# Supplementary material for: Non-classical microwave–optical photon pair generation with a chip-scale transducer
Source: Springer Nature journal article supplement (doi:10.1038/s41567-024-02409-z), 2024-02-23
Supplement: MOESM2 [file 41567_2024_2409_MOESM2_ESM.zip]

Archive with 48 entries (48 files):
- FigS10/data_key.txt
- FigS10/figS10.txt
- FigS11/figS11_a.mat
- FigS11/figS12_b.mat
- FigS12/figS12_a.mat
- FigS12/figS12_b.mat
- FigS12/figS12_c.mat
- FigS13/data_key.txt
- FigS13/figS13a_data.txt
- FigS13/figS13a_model.txt
- FigS13/figS13b_circles.txt
- FigS13/figS13b_triangles.txt
- FigS2/gOM_S2d_piezoLength820nm.txt
- FigS2/gOM_S2d_piezoLength840nm.txt
- FigS2/gOM_S2d_piezoLength860nm.txt
- FigS2/gOM_S2d_piezoLength880nm.txt
- FigS2/gOM_S2d_piezoLength900nm.txt
- FigS2/gOM_S2d_piezoLength920nm.txt
- FigS2/gOM_S2d_piezoLength940nm.txt
- FigS2/gPE_S2e_piezoLength820nm.txt
- FigS2/gPE_S2e_piezoLength840nm.txt
- FigS2/gPE_S2e_piezoLength860nm.txt
- FigS2/gPE_S2e_piezoLength880nm.txt
- FigS2/gPE_S2e_piezoLength900nm.txt
- FigS2/gPE_S2e_piezoLength920nm.txt
- FigS2/gPE_S2e_piezoLength940nm.txt
- FigS5/s5_coilcurrent.txt
- FigS5/s5_frequency.txt
- FigS5/s5_magnitudeS11.txt
- FigS6/data_key_for_S6a.txt
- FigS6/data_S6a.txt
- FigS6/data_S6b.txt
- FigS7/data_key_for_S7.txt
- FigS7/figS7a.txt
- FigS7/figS7b_data.txt
- FigS7/figS7b_theory.txt
- FigS8/data_key_for_S8b.txt
- FigS8/figS8a_axis_limits.txt
- FigS8/figS8a_data.txt
- FigS8/figS8b.txt
- FigS9/data_key_cdagc.txt
- FigS9/figS9_bath_b.txt
- FigS9/figS9_bath_c.txt
- FigS9/figS9_bdagb_meas.txt
- FigS9/figS9_bdagb_sim.txt
- FigS9/figS9_cdagc.txt
- FigS9/figS9_na.txt
- FigS9/figS9_time_us.txt
