# Supplementary material for: Non-classical microwave–optical photon pair generation with a chip-scale transducer
Source: Springer Nature journal article supplement (doi:10.1038/s41567-024-02409-z), 2024-02-23
Supplement: MOESM2 [file 41567_2024_2409_MOESM2_ESM.zip › FigS2/gOM_S2d_piezoLength820nm.txt]

4.93375494822238,0.331718049173413
5.0073162453371,0.701523061247223
5.04261936065534,0.474949725256902
5.08780529482051,0.353965018562521
