# Supplementary material for: Non-classical microwave–optical photon pair generation with a chip-scale transducer
Source: Springer Nature journal article supplement (doi:10.1038/s41567-024-02409-z), 2024-02-23
Supplement: MOESM2 [file 41567_2024_2409_MOESM2_ESM.zip › FigS2/gOM_S2d_piezoLength840nm.txt]

4.93028010496901,0.313689547561047
5.00495062687532,0.676331491553672
5.04086011543096,0.537823950383623
5.08889150618901,0.34643965076005
