# Supplementary material for: Non-classical microwave–optical photon pair generation with a chip-scale transducer
Source: Springer Nature journal article supplement (doi:10.1038/s41567-024-02409-z), 2024-02-23
Supplement: MOESM2 [file 41567_2024_2409_MOESM2_ESM.zip › FigS2/gOM_S2d_piezoLength860nm.txt]

4.92389988387118,0.296059299937116
4.99758472554172,0.64341191076642
5.0359542494282,0.59255487767378
5.08827299773382,0.351858701820759
