# Supplementary material for: Non-classical microwave–optical photon pair generation with a chip-scale transducer
Source: Springer Nature journal article supplement (doi:10.1038/s41567-024-02409-z), 2024-02-23
Supplement: MOESM2 [file 41567_2024_2409_MOESM2_ESM.zip › FigS2/gOM_S2d_piezoLength880nm.txt]

4.91559882784747,0.275373267370954
4.99073266656937,0.59084236592382
5.03200380097849,0.658543591906484
5.08825537556658,0.35144684141274
