# Supplementary material for: Non-classical microwave–optical photon pair generation with a chip-scale transducer
Source: Springer Nature journal article supplement (doi:10.1038/s41567-024-02409-z), 2024-02-23
Supplement: MOESM2 [file 41567_2024_2409_MOESM2_ESM.zip › FigS2/gOM_S2d_piezoLength900nm.txt]

4.90668731649953,0.23735384365399
4.97945968101946,0.524379518889578
5.02667068410969,0.700640028864652
5.08773462925078,0.376190855251964
5.13134044311951,0.107534232294613
