# Supplementary material for: Non-classical microwave–optical photon pair generation with a chip-scale transducer
Source: Springer Nature journal article supplement (doi:10.1038/s41567-024-02409-z), 2024-02-23
Supplement: MOESM2 [file 41567_2024_2409_MOESM2_ESM.zip › FigS2/gOM_S2d_piezoLength920nm.txt]

4.89313479167409,0.195363892001789
4.96732485969043,0.46226344808253
5.02186422519405,0.733449109288828
5.08441788252862,0.397347023232713
