# Supplementary material for: Non-classical microwave–optical photon pair generation with a chip-scale transducer
Source: Springer Nature journal article supplement (doi:10.1038/s41567-024-02409-z), 2024-02-23
Supplement: MOESM2 [file 41567_2024_2409_MOESM2_ESM.zip › FigS2/gOM_S2d_piezoLength940nm.txt]

4.8735726198936,0.153552735597137
4.9531431606411,0.40707726355417
5.01660552162178,0.741031633148249
5.07983189071311,0.421060622740593
