# Supplementary material for: Non-classical microwave–optical photon pair generation with a chip-scale transducer
Source: Springer Nature journal article supplement (doi:10.1038/s41567-024-02409-z), 2024-02-23
Supplement: MOESM2 [file 41567_2024_2409_MOESM2_ESM.zip › FigS2/gPE_S2e_piezoLength820nm.txt]

4.93375494822238,0.209581398396301
5.0073162453371,1.32104913767725
5.04261936065534,4.36882419081158
5.08780529482051,3.6467479573122
