# Supplementary material for: Non-classical microwave–optical photon pair generation with a chip-scale transducer
Source: Springer Nature journal article supplement (doi:10.1038/s41567-024-02409-z), 2024-02-23
Supplement: MOESM2 [file 41567_2024_2409_MOESM2_ESM.zip › FigS2/gPE_S2e_piezoLength840nm.txt]

4.93028010496901,0.0779586195879766
5.00495062687532,1.81974996191123
5.04086011543096,4.21826653587729
5.08889150618901,3.70088391782515
