# Supplementary material for: Non-classical microwave–optical photon pair generation with a chip-scale transducer
Source: Springer Nature journal article supplement (doi:10.1038/s41567-024-02409-z), 2024-02-23
Supplement: MOESM2 [file 41567_2024_2409_MOESM2_ESM.zip › FigS2/gPE_S2e_piezoLength860nm.txt]

4.92389988387118,0.456116213136338
4.99758472554172,2.41062411753288
5.0359542494282,4.1962310935643
5.08827299773382,3.75514722855144
