# Supplementary material for: Non-classical microwave–optical photon pair generation with a chip-scale transducer
Source: Springer Nature journal article supplement (doi:10.1038/s41567-024-02409-z), 2024-02-23
Supplement: MOESM2 [file 41567_2024_2409_MOESM2_ESM.zip › FigS2/gPE_S2e_piezoLength900nm.txt]

4.90668731649953,1.87301866418259
4.97945968101946,4.04405441583548
5.02667068410969,3.88757639766408
5.08773462925078,3.86168388629902
5.13134044311951,1.764184993086
