# Supplementary material for: Non-classical microwave–optical photon pair generation with a chip-scale transducer
Source: Springer Nature journal article supplement (doi:10.1038/s41567-024-02409-z), 2024-02-23
Supplement: MOESM2 [file 41567_2024_2409_MOESM2_ESM.zip › FigS2/gPE_S2e_piezoLength920nm.txt]

4.89313479167409,2.82538236643525
4.96732485969043,4.53890170758493
5.02186422519405,3.51342807384622
5.08441788252862,3.97644248373499
