# Supplementary material for: Non-classical microwave–optical photon pair generation with a chip-scale transducer
Source: Springer Nature journal article supplement (doi:10.1038/s41567-024-02409-z), 2024-02-23
Supplement: MOESM2 [file 41567_2024_2409_MOESM2_ESM.zip › FigS2/gPE_S2e_piezoLength940nm.txt]

4.8735726198936,3.94393669015044
4.9531431606411,4.50684684831943
5.01660552162178,3.0883429589636
5.07983189071311,3.61438282890906
