# Supplementary material for: Non-classical microwave–optical photon pair generation with a chip-scale transducer
Source: Springer Nature journal article supplement (doi:10.1038/s41567-024-02409-z), 2024-02-23
Supplement: MOESM2 [file 41567_2024_2409_MOESM2_ESM.zip › FigS5/s5_coilcurrent.txt]

0,0.00025,0.0005,0.00075,0.001,0.00125,0.0015,0.00175,0.002,0.00225,0.0025,0.00275,0.003,0.00325,0.0035,0.00375,0.004,0.00425,0.0045,0.00475,0.005,0.00525,0.0055,0.00575,0.006,0.00625,0.0065,0.00675,0.007,0.00725,0.0075,0.00775,0.008,0.00825,0.0085,0.00875,0.009,0.00925,0.0095,0.00975,0.01,0.01025,0.0105,0.01075,0.011,0.01125,0.0115,0.01175,0.012,0.01225,0.0125,0.01275,0.013,0.01325,0.0135,0.01375,0.014,0.01425,0.0145,0.01475,0.015,0.01525,0.0155,0.01575,0.016,0.01625,0.0165,0.01675,0.017,0.01725,0.0175,0.01775,0.018,0.01825,0.0185,0.01875,0.019,0.01925,0.0195,0.01975,0.02,0.02025,0.0205,0.02075,0.021,0.02125,0.0215,0.02175,0.022,0.02225,0.0225,0.02275,0.023,0.02325,0.0235,0.02375,0.024,0.02425,0.0245,0.02475,0.025,0.02525,0.0255,0.02575,0.026,0.02625,0.0265,0.02675,0.027,0.02725,0.0275,0.02775,0.028,0.02825,0.0285,0.02875,0.029,0.02925,0.0295,0.02975,0.03,0.03025,0.0305,0.03075,0.031,0.03125,0.0315,0.03175,0.032,0.03225,0.0325,0.03275,0.033,0.03325,0.0335,0.03375,0.034,0.03425,0.0345,0.03475,0.035,0.03525,0.0355,0.03575,0.036,0.03625,0.0365,0.03675,0.037,0.03725,0.0375,0.03775,0.038,0.03825,0.0385,0.03875,0.039,0.03925,0.0395,0.03975,0.04,0.04025,0.0405,0.04075,0.041,0.04125,0.0415,0.04175,0.042,0.04225,0.0425,0.04275,0.043,0.04325,0.0435,0.04375,0.044,0.04425,0.0445,0.04475,0.045,0.04525,0.0455,0.04575,0.046,0.04625,0.0465,0.04675,0.047,0.04725,0.0475,0.04775,0.048,0.04825,0.0485,0.04875,0.049,0.04925,0.0495,0.04975,0.05,0.05025,0.0505,0.05075,0.051,0.05125,0.0515,0.05175,0.052,0.05225,0.0525,0.05275,0.053,0.05325,0.0535,0.05375,0.054,0.05425,0.0545,0.05475,0.055,0.05525,0.0555,0.05575,0.056,0.05625,0.0565,0.05675,0.057,0.05725,0.0575,0.05775,0.058,0.05825,0.0585,0.05875,0.059,0.05925,0.0595,0.05975,0.06,0.06025,0.0605,0.06075,0.061,0.06125,0.0615,0.06175,0.062,0.06225,0.0625,0.06275,0.063,0.06325,0.0635,0.06375,0.064,0.06425,0.0645,0.06475,0.065,0.06525,0.0655,0.06575,0.066,0.06625,0.0665,0.06675,0.067,0.06725,0.0675,0.06775,0.068,0.06825,0.0685,0.06875,0.069,0.06925,0.0695,0.06975,0.07,0.07025,0.0705,0.07075,0.071,0.07125,0.0715,0.07175,0.072,0.07225,0.0725,0.07275,0.073,0.07325,0.0735,0.07375,0.074,0.07425,0.0745,0.07475,0.075,0.07525,0.0755,0.07575,0.076,0.07625,0.0765,0.07675,0.077,0.07725,0.0775,0.07775,0.078,0.07825,0.0785,0.07875,0.079,0.07925,0.0795,0.07975,0.08,0.08025,0.0805,0.08075,0.081,0.08125,0.0815,0.08175,0.082,0.08225,0.0825,0.08275,0.083,0.08325,0.0835,0.08375,0.084,0.08425,0.0845,0.08475,0.085,0.08525,0.0855,0.08575,0.086,0.08625,0.0865,0.08675,0.087,0.08725,0.0875,0.08775,0.088,0.08825,0.0885,0.08875,0.089,0.08925,0.0895,0.08975,0.09,0.09025,0.0905,0.09075,0.091,0.09125,0.0915,0.09175,0.092,0.09225,0.0925,0.09275,0.093,0.09325,0.0935,0.09375,0.094,0.09425,0.0945,0.09475,0.095,0.09525,0.0955,0.09575,0.096,0.09625,0.0965,0.09675,0.097,0.09725,0.0975,0.09775,0.098,0.09825,0.0985,0.09875,0.099,0.09925,0.0995,0.09975,0.1,0.10025,0.1005,0.10075,0.101,0.10125,0.1015,0.10175,0.102,0.10225,0.1025,0.10275,0.103,0.10325,0.1035,0.10375,0.104,0.10425,0.1045,0.10475,0.105,0.10525,0.1055,0.10575,0.106,0.10625,0.1065,0.10675,0.107,0.10725,0.1075,0.10775,0.108,0.10825,0.1085,0.10875,0.109,0.10925,0.1095,0.10975,0.11,0.11025,0.1105,0.11075,0.111,0.11125,0.1115,0.11175,0.112,0.11225,0.1125,0.11275,0.113,0.11325,0.1135,0.11375,0.114,0.11425,0.1145,0.11475,0.115,0.11525,0.1155,0.11575,0.116,0.11625,0.1165,0.11675,0.117,0.11725,0.1175,0.11775,0.118,0.11825,0.1185,0.11875,0.119,0.11925,0.1195,0.11975,0.12,0.12025,0.1205,0.12075,0.121,0.12125,0.1215,0.12175,0.122,0.12225,0.1225,0.12275,0.123,0.12325,0.1235,0.12375,0.124,0.12425,0.1245,0.12475,0.125,0.12525,0.1255,0.12575,0.126,0.12625,0.1265,0.12675,0.127,0.12725,0.1275,0.12775,0.128,0.12825,0.1285,0.12875,0.129,0.12925,0.1295,0.12975,0.13,0.13025,0.1305,0.13075,0.131,0.13125,0.1315,0.13175,0.132,0.13225,0.1325,0.13275,0.133,0.13325,0.1335,0.13375,0.134,0.13425,0.1345,0.13475,0.135,0.13525,0.1355,0.13575,0.136,0.13625,0.1365,0.13675,0.137,0.13725,0.1375,0.13775,0.138,0.13825,0.1385,0.13875,0.139,0.13925,0.1395,0.13975,0.14
