# Supplementary material for: Non-classical microwave–optical photon pair generation with a chip-scale transducer
Source: Springer Nature journal article supplement (doi:10.1038/s41567-024-02409-z), 2024-02-23
Supplement: MOESM2 [file 41567_2024_2409_MOESM2_ESM.zip › FigS5/s5_frequency.txt]

4.90001800036001,4.90005400108002,4.90009000180004,4.90012600252005,4.90016200324007,4.90019800396008,4.90023400468009,4.90027000540011,4.90030600612012,4.90034200684014,4.90037800756015,4.90041400828017,4.90045000900018,4.90048600972019,4.90052201044021,4.90055801116022,4.90059401188024,4.90063001260025,4.90066601332027,4.90070201404028,4.90073801476029,4.90077401548031,4.90081001620032,4.90084601692034,4.90088201764035,4.90091801836037,4.90095401908038,4.9009900198004,4.90102602052041,4.90106202124043,4.90109802196044,4.90113402268045,4.90117002340047,4.90120602412048,4.9012420248405,4.90127802556051,4.90131402628053,4.90135002700054,4.90138602772055,4.90142202844057,4.90145802916058,4.9014940298806,4.90153003060061,4.90156603132063,4.90160203204064,4.90163803276066,4.90167403348067,4.90171003420068,4.9017460349207,4.90178203564071,4.90181803636073,4.90185403708074,4.90189003780076,4.90192603852077,4.90196203924078,4.9019980399608,4.90203404068081,4.90207004140083,4.90210604212084,4.90214204284086,4.90217804356087,4.90221404428089,4.9022500450009,4.90228604572092,4.90232204644093,4.90235804716094,4.90239404788096,4.90243004860097,4.90246604932099,4.902502050041,4.90253805076102,4.90257405148103,4.90261005220104,4.90264605292106,4.90268205364107,4.90271805436109,4.9027540550811,4.90279005580112,4.90282605652113,4.90286205724115,4.90289805796116,4.90293405868117,4.90297005940119,4.9030060601212,4.90304206084122,4.90307806156123,4.90311406228125,4.90315006300126,4.90318606372127,4.90322206444129,4.9032580651613,4.90329406588132,4.90333006660133,4.90336606732135,4.90340206804136,4.90343806876138,4.90347406948139,4.9035100702014,4.90354607092142,4.90358207164143,4.90361807236145,4.90365407308146,4.90369007380148,4.90372607452149,4.9037620752415,4.90379807596152,4.90383407668153,4.90387007740155,4.90390607812156,4.90394207884158,4.90397807956159,4.90401408028161,4.90405008100162,4.90408608172163,4.90412208244165,4.90415808316166,4.90419408388168,4.90423008460169,4.90426608532171,4.90430208604172,4.90433808676174,4.90437408748175,4.90441008820176,4.90444608892178,4.90448208964179,4.90451809036181,4.90455409108182,4.90459009180184,4.90462609252185,4.90466209324187,4.90469809396188,4.90473409468189,4.90477009540191,4.90480609612192,4.90484209684194,4.90487809756195,4.90491409828197,4.90495009900198,4.90498609972199,4.90502210044201,4.90505810116202,4.90509410188204,4.90513010260205,4.90516610332207,4.90520210404208,4.9052381047621,4.90527410548211,4.90531010620212,4.90534610692214,4.90538210764215,4.90541810836217,4.90545410908218,4.9054901098022,4.90552611052221,4.90556211124222,4.90559811196224,4.90563411268225,4.90567011340227,4.90570611412228,4.9057421148423,4.90577811556231,4.90581411628233,4.90585011700234,4.90588611772236,4.90592211844237,4.90595811916238,4.9059941198824,4.90603012060241,4.90606612132243,4.90610212204244,4.90613812276246,4.90617412348247,4.90621012420248,4.9062461249225,4.90628212564251,4.90631812636253,4.90635412708254,4.90639012780256,4.90642612852257,4.90646212924259,4.9064981299626,4.90653413068261,4.90657013140263,4.90660613212264,4.90664213284266,4.90667813356267,4.90671413428269,4.9067501350027,4.90678613572272,4.90682213644273,4.90685813716274,4.90689413788276,4.90693013860277,4.90696613932279,4.9070021400428,4.90703814076282,4.90707414148283,4.90711014220284,4.90714614292286,4.90718214364287,4.90721814436289,4.9072541450829,4.90729014580292,4.90732614652293,4.90736214724294,4.90739814796296,4.90743414868297,4.90747014940299,4.907506150123,4.90754215084302,4.90757815156303,4.90761415228305,4.90765015300306,4.90768615372307,4.90772215444309,4.9077581551631,4.90779415588312,4.90783015660313,4.90786615732315,4.90790215804316,4.90793815876318,4.90797415948319,4.9080101602032,4.90804616092322,4.90808216164323,4.90811816236325,4.90815416308326,4.90819016380328,4.90822616452329,4.90826216524331,4.90829816596332,4.90833416668333,4.90837016740335,4.90840616812336,4.90844216884338,4.90847816956339,4.90851417028341,4.90855017100342,4.90858617172344,4.90862217244345,4.90865817316346,4.90869417388348,4.90873017460349,4.90876617532351,4.90880217604352,4.90883817676354,4.90887417748355,4.90891017820356,4.90894617892358,4.90898217964359,4.90901818036361,4.90905418108362,4.90909018180364,4.90912618252365,4.90916218324366,4.90919818396368,4.90923418468369,4.90927018540371,4.90930618612372,4.90934218684374,4.90937818756375,4.90941418828377,4.90945018900378,4.9094861897238,4.90952219044381,4.90955819116382,4.90959419188384,4.90963019260385,4.90966619332387,4.90970219404388,4.9097381947639,4.90977419548391,4.90981019620392,4.90984619692394,4.90988219764395,4.90991819836397,4.90995419908398,4.909990199804,4.91002620052401,4.91006220124403,4.91009820196404,4.91013420268405,4.91017020340407,4.91020620412408,4.9102422048441,4.91027820556411,4.91031420628413,4.91035020700414,4.91038620772416,4.91042220844417,4.91045820916418,4.9104942098842,4.91053021060421,4.91056621132423,4.91060221204424,4.91063821276426,4.91067421348427,4.91071021420428,4.9107462149243,4.91078221564431,4.91081821636433,4.91085421708434,4.91089021780436,4.91092621852437,4.91096221924438,4.9109982199644,4.91103422068441,4.91107022140443,4.91110622212444,4.91114222284446,4.91117822356447,4.91121422428449,4.9112502250045,4.91128622572451,4.91132222644453,4.91135822716454,4.91139422788456,4.91143022860457,4.91146622932459,4.9115022300446,4.91153823076462,4.91157423148463,4.91161023220464,4.91164623292466,4.91168223364467,4.91171823436469,4.9117542350847,4.91179023580472,4.91182623652473,4.91186223724475,4.91189823796476,4.91193423868477,4.91197023940479,4.9120062401248,4.91204224084482,4.91207824156483,4.91211424228485,4.91215024300486,4.91218624372488,4.91222224444489,4.9122582451649,4.91229424588492,4.91233024660493,4.91236624732495,4.91240224804496,4.91243824876498,4.91247424948499,4.912510250205,4.91254625092502,4.91258225164503,4.91261825236505,4.91265425308506,4.91269025380508,4.91272625452509,4.9127622552451,4.91279825596512,4.91283425668513,4.91287025740515,4.91290625812516,4.91294225884518,4.91297825956519,4.91301426028521,4.91305026100522,4.91308626172523,4.91312226244525,4.91315826316526,4.91319426388528,4.91323026460529,4.91326626532531,4.91330226604532,4.91333826676534,4.91337426748535,4.91341026820536,4.91344626892538,4.91348226964539,4.91351827036541,4.91355427108542,4.91359027180544,4.91362627252545,4.91366227324546,4.91369827396548,4.91373427468549,4.91377027540551,4.91380627612552,4.91384227684554,4.91387827756555,4.91391427828557,4.91395027900558,4.9139862797256,4.91402228044561,4.91405828116562,4.91409428188564,4.91413028260565,4.91416628332567,4.91420228404568,4.9142382847657,4.91427428548571,4.91431028620572,4.91434628692574,4.91438228764575,4.91441828836577,4.91445428908578,4.9144902898058,4.91452629052581,4.91456229124582,4.91459829196584,4.91463429268585,4.91467029340587,4.91470629412588,4.9147422948459,4.91477829556591,4.91481429628593,4.91485029700594,4.91488629772595,4.91492229844597,4.91495829916598,4.914994299886,4.91503030060601,4.91506630132603,4.91510230204604,4.91513830276606,4.91517430348607,4.91521030420608,4.9152463049261,4.91528230564611,4.91531830636613,4.91535430708614,4.91539030780616,4.91542630852617,4.91546230924619,4.9154983099662,4.91553431068621,4.91557031140623,4.91560631212624,4.91564231284626,4.91567831356627,4.91571431428629,4.9157503150063,4.91578631572632,4.91582231644633,4.91585831716634,4.91589431788636,4.91593031860637,4.91596631932639,4.9160023200464,4.91603832076642,4.91607432148643,4.91611032220644,4.91614632292646,4.91618232364647,4.91621832436649,4.9162543250865,4.91629032580652,4.91632632652653,4.91636232724654,4.91639832796656,4.91643432868657,4.91647032940659,4.9165063301266,4.91654233084662,4.91657833156663,4.91661433228665,4.91665033300666,4.91668633372667,4.91672233444669,4.9167583351667,4.91679433588672,4.91683033660673,4.91686633732675,4.91690233804676,4.91693833876678,4.91697433948679,4.9170103402068,4.91704634092682,4.91708234164683,4.91711834236685,4.91715434308686,4.91719034380688,4.91722634452689,4.9172623452469,4.91729834596692,4.91733434668693,4.91737034740695,4.91740634812696,4.91744234884698,4.91747834956699,4.91751435028701,4.91755035100702,4.91758635172704,4.91762235244705,4.91765835316706,4.91769435388708,4.91773035460709,4.91776635532711,4.91780235604712,4.91783835676714,4.91787435748715,4.91791035820716,4.91794635892718,4.91798235964719,4.91801836036721,4.91805436108722,4.91809036180724,4.91812636252725,4.91816236324726,4.91819836396728,4.91823436468729,4.91827036540731,4.91830636612732,4.91834236684734,4.91837836756735,4.91841436828737,4.91845036900738,4.91848636972739,4.91852237044741,4.91855837116742,4.91859437188744,4.91863037260745,4.91866637332747,4.91870237404748,4.9187383747675,4.91877437548751,4.91881037620752,4.91884637692754,4.91888237764755,4.91891837836757,4.91895437908758,4.9189903798076,4.91902638052761,4.91906238124763,4.91909838196764,4.91913438268765,4.91917038340767,4.91920638412768,4.9192423848477,4.91927838556771,4.91931438628773,4.91935038700774,4.91938638772776,4.91942238844777,4.91945838916778,4.9194943898878,4.91953039060781,4.91956639132783,4.91960239204784,4.91963839276786,4.91967439348787,4.91971039420788,4.9197463949279,4.91978239564791,4.91981839636793,4.91985439708794,4.91989039780796,4.91992639852797,4.91996239924798,4.919998399968,4.92003440068801,4.92007040140803,4.92010640212804,4.92014240284806,4.92017840356807,4.92021440428809,4.9202504050081,4.92028640572811,4.92032240644813,4.92035840716814,4.92039440788816,4.92043040860817,4.92046640932819,4.9205024100482,4.92053841076822,4.92057441148823,4.92061041220824,4.92064641292826,4.92068241364827,4.92071841436829,4.9207544150883,4.92079041580832,4.92082641652833,4.92086241724834,4.92089841796836,4.92093441868837,4.92097041940839,4.9210064201284,4.92104242084842,4.92107842156843,4.92111442228845,4.92115042300846,4.92118642372848,4.92122242444849,4.9212584251685,4.92129442588852,4.92133042660853,4.92136642732855,4.92140242804856,4.92143842876858,4.92147442948859,4.9215104302086,4.92154643092862,4.92158243164863,4.92161843236865,4.92165443308866,4.92169043380868,4.92172643452869,4.9217624352487,4.92179843596872,4.92183443668873,4.92187043740875,4.92190643812876,4.92194243884878,4.92197843956879,4.92201444028881,4.92205044100882,4.92208644172883,4.92212244244885,4.92215844316886,4.92219444388888,4.92223044460889,4.92226644532891,4.92230244604892,4.92233844676894,4.92237444748895,4.92241044820896,4.92244644892898,4.92248244964899,4.92251845036901,4.92255445108902,4.92259045180904,4.92262645252905,4.92266245324907,4.92269845396908,4.92273445468909,4.92277045540911,4.92280645612912,4.92284245684914,4.92287845756915,4.92291445828917,4.92295045900918,4.9229864597292,4.92302246044921,4.92305846116922,4.92309446188924,4.92313046260925,4.92316646332927,4.92320246404928,4.9232384647693,4.92327446548931,4.92331046620932,4.92334646692934,4.92338246764935,4.92341846836937,4.92345446908938,4.9234904698094,4.92352647052941,4.92356247124942,4.92359847196944,4.92363447268945,4.92367047340947,4.92370647412948,4.9237424748495,4.92377847556951,4.92381447628953,4.92385047700954,4.92388647772955,4.92392247844957,4.92395847916958,4.9239944798896,4.92403048060961,4.92406648132963,4.92410248204964,4.92413848276966,4.92417448348967,4.92421048420968,4.9242464849297,4.92428248564971,4.92431848636973,4.92435448708974,4.92439048780976,4.92442648852977,4.92446248924978,4.9244984899698,4.92453449068981,4.92457049140983,4.92460649212984,4.92464249284986,4.92467849356987,4.92471449428989,4.9247504950099,4.92478649572992,4.92482249644993,4.92485849716994,4.92489449788996,4.92493049860997,4.92496649932999,4.92500250005,4.92503850077002,4.92507450149003,4.92511050221004,4.92514650293006,4.92518250365007,4.92521850437009,4.9252545050901,4.92529050581012,4.92532650653013,4.92536250725015,4.92539850797016,4.92543450869017,4.92547050941019,4.9255065101302,4.92554251085022,4.92557851157023,4.92561451229025,4.92565051301026,4.92568651373027,4.92572251445029,4.9257585151703,4.92579451589032,4.92583051661033,4.92586651733035,4.92590251805036,4.92593851877038,4.92597451949039,4.9260105202104,4.92604652093042,4.92608252165043,4.92611852237045,4.92615452309046,4.92619052381048,4.92622652453049,4.92626252525051,4.92629852597052,4.92633452669053,4.92637052741055,4.92640652813056,4.92644252885058,4.92647852957059,4.92651453029061,4.92655053101062,4.92658653173063,4.92662253245065,4.92665853317066,4.92669453389068,4.92673053461069,4.92676653533071,4.92680253605072,4.92683853677074,4.92687453749075,4.92691053821076,4.92694653893078,4.92698253965079,4.92701854037081,4.92705454109082,4.92709054181084,4.92712654253085,4.92716254325087,4.92719854397088,4.92723454469089,4.92727054541091,4.92730654613092,4.92734254685094,4.92737854757095,4.92741454829097,4.92745054901098,4.92748654973099,4.92752255045101,4.92755855117102,4.92759455189104,4.92763055261105,4.92766655333107,4.92770255405108,4.9277385547711,4.92777455549111,4.92781055621112,4.92784655693114,4.92788255765115,4.92791855837117,4.92795455909118,4.9279905598112,4.92802656053121,4.92806256125122,4.92809856197124,4.92813456269125,4.92817056341127,4.92820656413128,4.9282425648513,4.92827856557131,4.92831456629133,4.92835056701134,4.92838656773135,4.92842256845137,4.92845856917138,4.9284945698914,4.92853057061141,4.92856657133143,4.92860257205144,4.92863857277146,4.92867457349147,4.92871057421148,4.9287465749315,4.92878257565151,4.92881857637153,4.92885457709154,4.92889057781156,4.92892657853157,4.92896257925159,4.9289985799716,4.92903458069161,4.92907058141163,4.92910658213164,4.92914258285166,4.92917858357167,4.92921458429169,4.9292505850117,4.92928658573171,4.92932258645173,4.92935858717174,4.92939458789176,4.92943058861177,4.92946658933179,4.9295025900518,4.92953859077182,4.92957459149183,4.92961059221185,4.92964659293186,4.92968259365187,4.92971859437189,4.9297545950919,4.92979059581192,4.92982659653193,4.92986259725195,4.92989859797196,4.92993459869197,4.92997059941199,4.930006600132,4.93004260085202,4.93007860157203,4.93011460229205,4.93015060301206,4.93018660373207,4.93022260445209,4.9302586051721,4.93029460589212,4.93033060661213,4.93036660733215,4.93040260805216,4.93043860877218,4.93047460949219,4.9305106102122,4.93054661093222,4.93058261165223,4.93061861237225,4.93065461309226,4.93069061381228,4.93072661453229,4.93076261525231,4.93079861597232,4.93083461669233,4.93087061741235,4.93090661813236,4.93094261885238,4.93097861957239,4.93101462029241,4.93105062101242,4.93108662173243,4.93112262245245,4.93115862317246,4.93119462389248,4.93123062461249,4.93126662533251,4.93130262605252,4.93133862677254,4.93137462749255,4.93141062821257,4.93144662893258,4.93148262965259,4.93151863037261,4.93155463109262,4.93159063181264,4.93162663253265,4.93166263325266,4.93169863397268,4.93173463469269,4.93177063541271,4.93180663613272,4.93184263685274,4.93187863757275,4.93191463829277,4.93195063901278,4.93198663973279,4.93202264045281,4.93205864117282,4.93209464189284,4.93213064261285,4.93216664333287,4.93220264405288,4.9322386447729,4.93227464549291,4.93231064621292,4.93234664693294,4.93238264765295,4.93241864837297,4.93245464909298,4.932490649813,4.93252665053301,4.93256265125303,4.93259865197304,4.93263465269305,4.93267065341307,4.93270665413308,4.9327426548531,4.93277865557311,4.93281465629313,4.93285065701314,4.93288665773315,4.93292265845317,4.93295865917318,4.9329946598932,4.93303066061321,4.93306666133323,4.93310266205324,4.93313866277326,4.93317466349327,4.93321066421329,4.9332466649333,4.93328266565331,4.93331866637333,4.93335466709334,4.93339066781336,4.93342666853337,4.93346266925338,4.9334986699734,4.93353467069341,4.93357067141343,4.93360667213344,4.93364267285346,4.93367867357347,4.93371467429349,4.9337506750135,4.93378667573351,4.93382267645353,4.93385867717354,4.93389467789356,4.93393067861357,4.93396667933359,4.9340026800536,4.93403868077362,4.93407468149363,4.93411068221364,4.93414668293366,4.93418268365367,4.93421868437369,4.9342546850937,4.93429068581372,4.93432668653373,4.93436268725375,4.93439868797376,4.93443468869377,4.93447068941379,4.9345066901338,4.93454269085382,4.93457869157383,4.93461469229385,4.93465069301386,4.93468669373387,4.93472269445389,4.9347586951739,4.93479469589392,4.93483069661393,4.93486669733395,4.93490269805396,4.93493869877398,4.93497469949399,4.93501070021401,4.93504670093402,4.93508270165403,4.93511870237405,4.93515470309406,4.93519070381408,4.93522670453409,4.9352627052541,4.93529870597412,4.93533470669413,4.93537070741415,4.93540670813416,4.93544270885418,4.93547870957419,4.93551471029421,4.93555071101422,4.93558671173423,4.93562271245425,4.93565871317426,4.93569471389428,4.93573071461429,4.93576671533431,4.93580271605432,4.93583871677434,4.93587471749435,4.93591071821436,4.93594671893438,4.93598271965439,4.93601872037441,4.93605472109442,4.93609072181444,4.93612672253445,4.93616272325447,4.93619872397448,4.93623472469449,4.93627072541451,4.93630672613452,4.93634272685454,4.93637872757455,4.93641472829457,4.93645072901458,4.93648672973459,4.93652273045461,4.93655873117462,4.93659473189464,4.93663073261465,4.93666673333467,4.93670273405468,4.9367387347747,4.93677473549471,4.93681073621473,4.93684673693474,4.93688273765475,4.93691873837477,4.93695473909478,4.9369907398148,4.93702674053481,4.93706274125482,4.93709874197484,4.93713474269485,4.93717074341487,4.93720674413488,4.9372427448549,4.93727874557491,4.93731474629493,4.93735074701494,4.93738674773495,4.93742274845497,4.93745874917498,4.937494749895,4.93753075061501,4.93756675133503,4.93760275205504,4.93763875277506,4.93767475349507,4.93771075421508,4.9377467549351,4.93778275565511,4.93781875637513,4.93785475709514,4.93789075781516,4.93792675853517,4.93796275925519,4.9379987599752,4.93803476069521,4.93807076141523,4.93810676213524,4.93814276285526,4.93817876357527,4.93821476429529,4.9382507650153,4.93828676573531,4.93832276645533,4.93835876717534,4.93839476789536,4.93843076861537,4.93846676933539,4.9385027700554,4.93853877077542,4.93857477149543,4.93861077221545,4.93864677293546,4.93868277365547,4.93871877437549,4.9387547750955,4.93879077581552,4.93882677653553,4.93886277725554,4.93889877797556,4.93893477869557,4.93897077941559,4.9390067801356,4.93904278085562,4.93907878157563,4.93911478229565,4.93915078301566,4.93918678373567,4.93922278445569,4.9392587851757,4.93929478589572,4.93933078661573,4.93936678733575,4.93940278805576,4.93943878877578,4.93947478949579,4.9395107902158,4.93954679093582,4.93958279165583,4.93961879237585,4.93965479309586,4.93969079381588,4.93972679453589,4.93976279525591,4.93979879597592,4.93983479669593,4.93987079741595,4.93990679813596,4.93994279885598,4.93997879957599,4.94001480029601,4.94005080101602,4.94008680173603,4.94012280245605,4.94015880317606,4.94019480389608,4.94023080461609,4.94026680533611,4.94030280605612,4.94033880677614,4.94037480749615,4.94041080821617,4.94044680893618,4.94048280965619,4.94051881037621,4.94055481109622,4.94059081181624,4.94062681253625,4.94066281325626,4.94069881397628,4.94073481469629,4.94077081541631,4.94080681613632,4.94084281685634,4.94087881757635,4.94091481829637,4.94095081901638,4.94098681973639,4.94102282045641,4.94105882117642,4.94109482189644,4.94113082261645,4.94116682333647,4.94120282405648,4.9412388247765,4.94127482549651,4.94131082621652,4.94134682693654,4.94138282765655,4.94141882837657,4.94145482909658,4.9414908298166,4.94152683053661,4.94156283125663,4.94159883197664,4.94163483269665,4.94167083341667,4.94170683413668,4.9417428348567,4.94177883557671,4.94181483629673,4.94185083701674,4.94188683773675,4.94192283845677,4.94195883917678,4.9419948398968,4.94203084061681,4.94206684133683,4.94210284205684,4.94213884277686,4.94217484349687,4.94221084421689,4.9422468449369,4.94228284565691,4.94231884637693,4.94235484709694,4.94239084781696,4.94242684853697,4.94246284925698,4.942498849977,4.94253485069701,4.94257085141703,4.94260685213704,4.94264285285706,4.94267885357707,4.94271485429709,4.9427508550171,4.94278685573711,4.94282285645713,4.94285885717714,4.94289485789716,4.94293085861717,4.94296685933719,4.9430028600572,4.94303886077722,4.94307486149723,4.94311086221724,4.94314686293726,4.94318286365727,4.94321886437729,4.9432548650973,4.94329086581732,4.94332686653733,4.94336286725735,4.94339886797736,4.94343486869737,4.94347086941739,4.9435068701374,4.94354287085742,4.94357887157743,4.94361487229745,4.94365087301746,4.94368687373747,4.94372287445749,4.9437588751775,4.94379487589752,4.94383087661753,4.94386687733755,4.94390287805756,4.94393887877758,4.94397487949759,4.94401088021761,4.94404688093762,4.94408288165763,4.94411888237765,4.94415488309766,4.94419088381768,4.94422688453769,4.9442628852577,4.94429888597772,4.94433488669773,4.94437088741775,4.94440688813776,4.94444288885778,4.94447888957779,4.94451489029781,4.94455089101782,4.94458689173783,4.94462289245785,4.94465889317786,4.94469489389788,4.94473089461789,4.94476689533791,4.94480289605792,4.94483889677794,4.94487489749795,4.94491089821796,4.94494689893798,4.94498289965799,4.94501890037801,4.94505490109802,4.94509090181804,4.94512690253805,4.94516290325807,4.94519890397808,4.94523490469809,4.94527090541811,4.94530690613812,4.94534290685814,4.94537890757815,4.94541490829817,4.94545090901818,4.94548690973819,4.94552291045821,4.94555891117822,4.94559491189824,4.94563091261825,4.94566691333827,4.94570291405828,4.9457389147783,4.94577491549831,4.94581091621833,4.94584691693834,4.94588291765835,4.94591891837837,4.94595491909838,4.9459909198184,4.94602692053841,4.94606292125843,4.94609892197844,4.94613492269845,4.94617092341847,4.94620692413848,4.9462429248585,4.94627892557851,4.94631492629853,4.94635092701854,4.94638692773856,4.94642292845857,4.94645892917858,4.9464949298986,4.94653093061861,4.94656693133863,4.94660293205864,4.94663893277866,4.94667493349867,4.94671093421868,4.9467469349387,4.94678293565871,4.94681893637873,4.94685493709874,4.94689093781876,4.94692693853877,4.94696293925879,4.9469989399788,4.94703494069881,4.94707094141883,4.94710694213884,4.94714294285886,4.94717894357887,4.94721494429889,4.9472509450189,4.94728694573891,4.94732294645893,4.94735894717894,4.94739494789896,4.94743094861897,4.94746694933899,4.947502950059,4.94753895077902,4.94757495149903,4.94761095221905,4.94764695293906,4.94768295365907,4.94771895437909,4.9477549550991,4.94779095581912,4.94782695653913,4.94786295725915,4.94789895797916,4.94793495869917,4.94797095941919,4.9480069601392,4.94804296085922,4.94807896157923,4.94811496229925,4.94815096301926,4.94818696373928,4.94822296445929,4.9482589651793,4.94829496589932,4.94833096661933,4.94836696733935,4.94840296805936,4.94843896877938,4.94847496949939,4.9485109702194,4.94854697093942,4.94858297165943,4.94861897237945,4.94865497309946,4.94869097381948,4.94872697453949,4.94876297525951,4.94879897597952,4.94883497669953,4.94887097741955,4.94890697813956,4.94894297885958,4.94897897957959,4.94901498029961,4.94905098101962,4.94908698173963,4.94912298245965,4.94915898317966,4.94919498389968,4.94923098461969,4.94926698533971,4.94930298605972,4.94933898677974,4.94937498749975,4.94941098821976,4.94944698893978,4.94948298965979,4.94951899037981,4.94955499109982,4.94959099181984,4.94962699253985,4.94966299325987,4.94969899397988,4.94973499469989,4.94977099541991,4.94980699613992,4.94984299685994,4.94987899757995,4.94991499829997,4.94995099901998,4.94998699974,4.95002300046001,4.95005900118002,4.95009500190004,4.95013100262005,4.95016700334007,4.95020300406008,4.9502390047801,4.95027500550011,4.95031100622012,4.95034700694014,4.95038300766015,4.95041900838017,4.95045500910018,4.9504910098202,4.95052701054021,4.95056301126023,4.95059901198024,4.95063501270026,4.95067101342027,4.95070701414028,4.9507430148603,4.95077901558031,4.95081501630033,4.95085101702034,4.95088701774035,4.95092301846037,4.95095901918038,4.9509950199004,4.95103102062041,4.95106702134043,4.95110302206044,4.95113902278046,4.95117502350047,4.95121102422048,4.9512470249405,4.95128302566051,4.95131902638053,4.95135502710054,4.95139102782056,4.95142702854057,4.95146302926059,4.9514990299806,4.95153503070061,4.95157103142063,4.95160703214064,4.95164303286066,4.95167903358067,4.95171503430069,4.9517510350207,4.95178703574072,4.95182303646073,4.95185903718074,4.95189503790076,4.95193103862077,4.95196703934079,4.9520030400608,4.95203904078082,4.95207504150083,4.95211104222084,4.95214704294086,4.95218304366087,4.95221904438089,4.9522550451009,4.95229104582092,4.95232704654093,4.95236304726095,4.95239904798096,4.95243504870097,4.95247104942099,4.952507050141,4.95254305086102,4.95257905158103,4.95261505230105,4.95265105302106,4.95268705374107,4.95272305446109,4.9527590551811,4.95279505590112,4.95283105662113,4.95286705734115,4.95290305806116,4.95293905878118,4.95297505950119,4.9530110602212,4.95304706094122,4.95308306166123,4.95311906238125,4.95315506310126,4.95319106382128,4.95322706454129,4.95326306526131,4.95329906598132,4.95333506670133,4.95337106742135,4.95340706814136,4.95344306886138,4.95347906958139,4.95351507030141,4.95355107102142,4.95358707174144,4.95362307246145,4.95365907318146,4.95369507390148,4.95373107462149,4.95376707534151,4.95380307606152,4.95383907678154,4.95387507750155,4.95391107822156,4.95394707894158,4.95398307966159,4.95401908038161,4.95405508110162,4.95409108182164,4.95412708254165,4.95416308326167,4.95419908398168,4.9542350847017,4.95427108542171,4.95430708614172,4.95434308686174,4.95437908758175,4.95441508830177,4.95445108902178,4.95448708974179,4.95452309046181,4.95455909118182,4.95459509190184,4.95463109262185,4.95466709334187,4.95470309406188,4.9547390947819,4.95477509550191,4.95481109622192,4.95484709694194,4.95488309766195,4.95491909838197,4.95495509910198,4.954991099822,4.95502710054201,4.95506310126203,4.95509910198204,4.95513510270205,4.95517110342207,4.95520710414208,4.9552431048621,4.95527910558211,4.95531510630213,4.95535110702214,4.95538710774216,4.95542310846217,4.95545910918218,4.9554951099022,4.95553111062221,4.95556711134223,4.95560311206224,4.95563911278226,4.95567511350227,4.95571111422228,4.9557471149423,4.95578311566231,4.95581911638233,4.95585511710234,4.95589111782236,4.95592711854237,4.95596311926239,4.9559991199824,4.95603512070241,4.95607112142243,4.95610712214244,4.95614312286246,4.95617912358247,4.95621512430249,4.9562511250225,4.95628712574251,4.95632312646253,4.95635912718254,4.95639512790256,4.95643112862257,4.95646712934259,4.9565031300626,4.95653913078262,4.95657513150263,4.95661113222264,4.95664713294266,4.95668313366267,4.95671913438269,4.9567551351027,4.95679113582272,4.95682713654273,4.95686313726275,4.95689913798276,4.95693513870277,4.95697113942279,4.9570071401428,4.95704314086282,4.95707914158283,4.95711514230285,4.95715114302286,4.95718714374288,4.95722314446289,4.9572591451829,4.95729514590292,4.95733114662293,4.95736714734295,4.95740314806296,4.95743914878298,4.95747514950299,4.957511150223,4.95754715094302,4.95758315166303,4.95761915238305,4.95765515310306,4.95769115382308,4.95772715454309,4.95776315526311,4.95779915598312,4.95783515670313,4.95787115742315,4.95790715814316,4.95794315886318,4.95797915958319,4.95801516030321,4.95805116102322,4.95808716174323,4.95812316246325,4.95815916318326,4.95819516390328,4.95823116462329,4.95826716534331,4.95830316606332,4.95833916678334,4.95837516750335,4.95841116822336,4.95844716894338,4.95848316966339,4.95851917038341,4.95855517110342,4.95859117182344,4.95862717254345,4.95866317326347,4.95869917398348,4.95873517470349,4.95877117542351,4.95880717614352,4.95884317686354,4.95887917758355,4.95891517830357,4.95895117902358,4.9589871797436,4.95902318046361,4.95905918118362,4.95909518190364,4.95913118262365,4.95916718334367,4.95920318406368,4.9592391847837,4.95927518550371,4.95931118622372,4.95934718694374,4.95938318766375,4.95941918838377,4.95945518910378,4.9594911898238,4.95952719054381,4.95956319126383,4.95959919198384,4.95963519270385,4.95967119342387,4.95970719414388,4.9597431948639,4.95977919558391,4.95981519630393,4.95985119702394,4.95988719774395,4.95992319846397,4.95995919918398,4.959995199904,4.96003120062401,4.96006720134403,4.96010320206404,4.96013920278406,4.96017520350407,4.96021120422408,4.9602472049441,4.96028320566411,4.96031920638413,4.96035520710414,4.96039120782416,4.96042720854417,4.96046320926419,4.9604992099842,4.96053521070421,4.96057121142423,4.96060721214424,4.96064321286426,4.96067921358427,4.96071521430429,4.9607512150243,4.96078721574432,4.96082321646433,4.96085921718434,4.96089521790436,4.96093121862437,4.96096721934439,4.9610032200644,4.96103922078442,4.96107522150443,4.96111122222444,4.96114722294446,4.96118322366447,4.96121922438449,4.9612552251045,4.96129122582452,4.96132722654453,4.96136322726455,4.96139922798456,4.96143522870457,4.96147122942459,4.9615072301446,4.96154323086462,4.96157923158463,4.96161523230465,4.96165123302466,4.96168723374467,4.96172323446469,4.9617592351847,4.96179523590472,4.96183123662473,4.96186723734475,4.96190323806476,4.96193923878478,4.96197523950479,4.9620112402248,4.96204724094482,4.96208324166483,4.96211924238485,4.96215524310486,4.96219124382488,4.96222724454489,4.96226324526491,4.96229924598492,4.96233524670493,4.96237124742495,4.96240724814496,4.96244324886498,4.96247924958499,4.96251525030501,4.96255125102502,4.96258725174504,4.96262325246505,4.96265925318506,4.96269525390508,4.96273125462509,4.96276725534511,4.96280325606512,4.96283925678514,4.96287525750515,4.96291125822516,4.96294725894518,4.96298325966519,4.96301926038521,4.96305526110522,4.96309126182524,4.96312726254525,4.96316326326527,4.96319926398528,4.96323526470529,4.96327126542531,4.96330726614532,4.96334326686534,4.96337926758535,4.96341526830537,4.96345126902538,4.96348726974539,4.96352327046541,4.96355927118542,4.96359527190544,4.96363127262545,4.96366727334547,4.96370327406548,4.9637392747855,4.96377527550551,4.96381127622552,4.96384727694554,4.96388327766555,4.96391927838557,4.96395527910558,4.9639912798256,4.96402728054561,4.96406328126563,4.96409928198564,4.96413528270565,4.96417128342567,4.96420728414568,4.9642432848657,4.96427928558571,4.96431528630573,4.96435128702574,4.96438728774576,4.96442328846577,4.96445928918578,4.9644952899058,4.96453129062581,4.96456729134583,4.96460329206584,4.96463929278586,4.96467529350587,4.96471129422588,4.9647472949459,4.96478329566591,4.96481929638593,4.96485529710594,4.96489129782596,4.96492729854597,4.96496329926599,4.964999299986,4.96503530070601,4.96507130142603,4.96510730214604,4.96514330286606,4.96517930358607,4.96521530430609,4.9652513050261,4.96528730574611,4.96532330646613,4.96535930718614,4.96539530790616,4.96543130862617,4.96546730934619,4.9655033100662,4.96553931078622,4.96557531150623,4.96561131222624,4.96564731294626,4.96568331366627,4.96571931438629,4.9657553151063,4.96579131582632,4.96582731654633,4.96586331726635,4.96589931798636,4.96593531870637,4.96597131942639,4.9660073201464,4.96604332086642,4.96607932158643,4.96611532230645,4.96615132302646,4.96618732374648,4.96622332446649,4.9662593251865,4.96629532590652,4.96633132662653,4.96636732734655,4.96640332806656,4.96643932878658,4.96647532950659,4.9665113302266,4.96654733094662,4.96658333166663,4.96661933238665,4.96665533310666,4.96669133382668,4.96672733454669,4.96676333526671,4.96679933598672,4.96683533670673,4.96687133742675,4.96690733814676,4.96694333886678,4.96697933958679,4.96701534030681,4.96705134102682,4.96708734174683,4.96712334246685,4.96715934318686,4.96719534390688,4.96723134462689,4.96726734534691,4.96730334606692,4.96733934678694,4.96737534750695,4.96741134822696,4.96744734894698,4.96748334966699,4.96751935038701,4.96755535110702,4.96759135182704,4.96762735254705,4.96766335326707,4.96769935398708,4.96773535470709,4.96777135542711,4.96780735614712,4.96784335686714,4.96787935758715,4.96791535830717,4.96795135902718,4.9679873597472,4.96802336046721,4.96805936118722,4.96809536190724,4.96813136262725,4.96816736334727,4.96820336406728,4.9682393647873,4.96827536550731,4.96831136622732,4.96834736694734,4.96838336766735,4.96841936838737,4.96845536910738,4.9684913698274,4.96852737054741,4.96856337126743,4.96859937198744,4.96863537270745,4.96867137342747,4.96870737414748,4.9687433748675,4.96877937558751,4.96881537630753,4.96885137702754,4.96888737774756,4.96892337846757,4.96895937918758,4.9689953799076,4.96903138062761,4.96906738134763,4.96910338206764,4.96913938278766,4.96917538350767,4.96921138422768,4.9692473849477,4.96928338566771,4.96931938638773,4.96935538710774,4.96939138782776,4.96942738854777,4.96946338926779,4.9694993899878,4.96953539070781,4.96957139142783,4.96960739214784,4.96964339286786,4.96967939358787,4.96971539430789,4.9697513950279,4.96978739574792,4.96982339646793,4.96985939718794,4.96989539790796,4.96993139862797,4.96996739934799,4.970003400068,4.97003940078802,4.97007540150803,4.97011140222804,4.97014740294806,4.97018340366807,4.97021940438809,4.9702554051081,4.97029140582812,4.97032740654813,4.97036340726815,4.97039940798816,4.97043540870817,4.97047140942819,4.9705074101482,4.97054341086822,4.97057941158823,4.97061541230825,4.97065141302826,4.97068741374828,4.97072341446829,4.9707594151883,4.97079541590832,4.97083141662833,4.97086741734835,4.97090341806836,4.97093941878838,4.97097541950839,4.97101142022841,4.97104742094842,4.97108342166843,4.97111942238845,4.97115542310846,4.97119142382848,4.97122742454849,4.97126342526851,4.97129942598852,4.97133542670853,4.97137142742855,4.97140742814856,4.97144342886858,4.97147942958859,4.97151543030861,4.97155143102862,4.97158743174864,4.97162343246865,4.97165943318866,4.97169543390868,4.97173143462869,4.97176743534871,4.97180343606872,4.97183943678874,4.97187543750875,4.97191143822876,4.97194743894878,4.97198343966879,4.97201944038881,4.97205544110882,4.97209144182884,4.97212744254885,4.97216344326887,4.97219944398888,4.97223544470889,4.97227144542891,4.97230744614892,4.97234344686894,4.97237944758895,4.97241544830897,4.97245144902898,4.972487449749,4.97252345046901,4.97255945118902,4.97259545190904,4.97263145262905,4.97266745334907,4.97270345406908,4.9727394547891,4.97277545550911,4.97281145622912,4.97284745694914,4.97288345766915,4.97291945838917,4.97295545910918,4.9729914598292,4.97302746054921,4.97306346126923,4.97309946198924,4.97313546270925,4.97317146342927,4.97320746414928,4.9732434648693,4.97327946558931,4.97331546630933,4.97335146702934,4.97338746774936,4.97342346846937,4.97345946918938,4.9734954699094,4.97353147062941,4.97356747134943,4.97360347206944,4.97363947278946,4.97367547350947,4.97371147422948,4.9737474749495,4.97378347566951,4.97381947638953,4.97385547710954,4.97389147782956,4.97392747854957,4.97396347926959,4.9739994799896,4.97403548070961,4.97407148142963,4.97410748214964,4.97414348286966,4.97417948358967,4.97421548430969,4.9742514850297,4.97428748574972,4.97432348646973,4.97435948718974,4.97439548790976,4.97443148862977,4.97446748934979,4.9745034900698,4.97453949078982,4.97457549150983,4.97461149222985,4.97464749294986,4.97468349366987,4.97471949438989,4.9747554951099,4.97479149582992,4.97482749654993,4.97486349726995,4.97489949798996,4.97493549870997,4.97497149942999,4.97500750015,4.97504350087002,4.97507950159003,4.97511550231005,4.97515150303006,4.97518750375008,4.97522350447009,4.9752595051901,4.97529550591012,4.97533150663013,4.97536750735015,4.97540350807016,4.97543950879018,4.97547550951019,4.9755115102302,4.97554751095022,4.97558351167023,4.97561951239025,4.97565551311026,4.97569151383028,4.97572751455029,4.97576351527031,4.97579951599032,4.97583551671033,4.97587151743035,4.97590751815036,4.97594351887038,4.97597951959039,4.97601552031041,4.97605152103042,4.97608752175044,4.97612352247045,4.97615952319046,4.97619552391048,4.97623152463049,4.97626752535051,4.97630352607052,4.97633952679054,4.97637552751055,4.97641152823056,4.97644752895058,4.97648352967059,4.97651953039061,4.97655553111062,4.97659153183064,4.97662753255065,4.97666353327067,4.97669953399068,4.97673553471069,4.97677153543071,4.97680753615072,4.97684353687074,4.97687953759075,4.97691553831077,4.97695153903078,4.9769875397508,4.97702354047081,4.97705954119082,4.97709554191084,4.97713154263085,4.97716754335087,4.97720354407088,4.9772395447909,4.97727554551091,4.97731154623092,4.97734754695094,4.97738354767095,4.97741954839097,4.97745554911098,4.977491549831,4.97752755055101,4.97756355127103,4.97759955199104,4.97763555271105,4.97767155343107,4.97770755415108,4.9777435548711,4.97777955559111,4.97781555631113,4.97785155703114,4.97788755775116,4.97792355847117,4.97795955919118,4.9779955599112,4.97803156063121,4.97806756135123,4.97810356207124,4.97813956279126,4.97817556351127,4.97821156423128,4.9782475649513,4.97828356567131,4.97831956639133,4.97835556711134,4.97839156783136,4.97842756855137,4.97846356927139,4.9784995699914,4.97853557071141,4.97857157143143,4.97860757215144,4.97864357287146,4.97867957359147,4.97871557431149,4.9787515750315,4.97878757575151,4.97882357647153,4.97885957719154,4.97889557791156,4.97893157863157,4.97896757935159,4.9790035800716,4.97903958079162,4.97907558151163,4.97911158223164,4.97914758295166,4.97918358367167,4.97921958439169,4.9792555851117,4.97929158583172,4.97932758655173,4.97936358727175,4.97939958799176,4.97943558871177,4.97947158943179,4.9795075901518,4.97954359087182,4.97957959159183,4.97961559231185,4.97965159303186,4.97968759375188,4.97972359447189,4.9797595951919,4.97979559591192,4.97983159663193,4.97986759735195,4.97990359807196,4.97993959879198,4.97997559951199,4.980011600232,4.98004760095202,4.98008360167203,4.98011960239205,4.98015560311206,4.98019160383208,4.98022760455209,4.98026360527211,4.98029960599212,4.98033560671213,4.98037160743215,4.98040760815216,4.98044360887218,4.98047960959219,4.98051561031221,4.98055161103222,4.98058761175224,4.98062361247225,4.98065961319226,4.98069561391228,4.98073161463229,4.98076761535231,4.98080361607232,4.98083961679234,4.98087561751235,4.98091161823236,4.98094761895238,4.98098361967239,4.98101962039241,4.98105562111242,4.98109162183244,4.98112762255245,4.98116362327247,4.98119962399248,4.98123562471249,4.98127162543251,4.98130762615252,4.98134362687254,4.98137962759255,4.98141562831257,4.98145162903258,4.9814876297526,4.98152363047261,4.98155963119262,4.98159563191264,4.98163163263265,4.98166763335267,4.98170363407268,4.9817396347927,4.98177563551271,4.98181163623272,4.98184763695274,4.98188363767275,4.98191963839277,4.98195563911278,4.9819916398328,4.98202764055281,4.98206364127283,4.98209964199284,4.98213564271285,4.98217164343287,4.98220764415288,4.9822436448729,4.98227964559291,4.98231564631293,4.98235164703294,4.98238764775295,4.98242364847297,4.98245964919298,4.982495649913,4.98253165063301,4.98256765135303,4.98260365207304,4.98263965279306,4.98267565351307,4.98271165423308,4.9827476549531,4.98278365567311,4.98281965639313,4.98285565711314,4.98289165783316,4.98292765855317,4.98296365927319,4.9829996599932,4.98303566071321,4.98307166143323,4.98310766215324,4.98314366287326,4.98317966359327,4.98321566431329,4.9832516650333,4.98328766575332,4.98332366647333,4.98335966719334,4.98339566791336,4.98343166863337,4.98346766935339,4.9835036700734,4.98353967079342,4.98357567151343,4.98361167223344,4.98364767295346,4.98368367367347,4.98371967439349,4.9837556751135,4.98379167583352,4.98382767655353,4.98386367727355,4.98389967799356,4.98393567871357,4.98397167943359,4.9840076801536,4.98404368087362,4.98407968159363,4.98411568231365,4.98415168303366,4.98418768375368,4.98422368447369,4.9842596851937,4.98429568591372,4.98433168663373,4.98436768735375,4.98440368807376,4.98443968879378,4.98447568951379,4.9845116902338,4.98454769095382,4.98458369167383,4.98461969239385,4.98465569311386,4.98469169383388,4.98472769455389,4.98476369527391,4.98479969599392,4.98483569671393,4.98487169743395,4.98490769815396,4.98494369887398,4.98497969959399,4.98501570031401,4.98505170103402,4.98508770175404,4.98512370247405,4.98515970319406,4.98519570391408,4.98523170463409,4.98526770535411,4.98530370607412,4.98533970679414,4.98537570751415,4.98541170823416,4.98544770895418,4.98548370967419,4.98551971039421,4.98555571111422,4.98559171183424,4.98562771255425,4.98566371327427,4.98569971399428,4.98573571471429,4.98577171543431,4.98580771615432,4.98584371687434,4.98587971759435,4.98591571831437,4.98595171903438,4.98598771975439,4.98602372047441,4.98605972119442,4.98609572191444,4.98613172263445,4.98616772335447,4.98620372407448,4.9862397247945,4.98627572551451,4.98631172623452,4.98634772695454,4.98638372767455,4.98641972839457,4.98645572911458,4.9864917298346,4.98652773055461,4.98656373127463,4.98659973199464,4.98663573271465,4.98667173343467,4.98670773415468,4.9867437348747,4.98677973559471,4.98681573631473,4.98685173703474,4.98688773775476,4.98692373847477,4.98695973919478,4.9869957399148,4.98703174063481,4.98706774135483,4.98710374207484,4.98713974279486,4.98717574351487,4.98721174423488,4.9872477449549,4.98728374567491,4.98731974639493,4.98735574711494,4.98739174783496,4.98742774855497,4.98746374927499,4.987499749995,4.98753575071501,4.98757175143503,4.98760775215504,4.98764375287506,4.98767975359507,4.98771575431509,4.9877517550351,4.98778775575512,4.98782375647513,4.98785975719514,4.98789575791516,4.98793175863517,4.98796775935519,4.9880037600752,4.98803976079522,4.98807576151523,4.98811176223524,4.98814776295526,4.98818376367527,4.98821976439529,4.9882557651153,4.98829176583532,4.98832776655533,4.98836376727535,4.98839976799536,4.98843576871537,4.98847176943539,4.9885077701554,4.98854377087542,4.98857977159543,4.98861577231545,4.98865177303546,4.98868777375548,4.98872377447549,4.9887597751955,4.98879577591552,4.98883177663553,4.98886777735555,4.98890377807556,4.98893977879558,4.98897577951559,4.9890117802356,4.98904778095562,4.98908378167563,4.98911978239565,4.98915578311566,4.98919178383568,4.98922778455569,4.98926378527571,4.98929978599572,4.98933578671573,4.98937178743575,4.98940778815576,4.98944378887578,4.98947978959579,4.98951579031581,4.98955179103582,4.98958779175584,4.98962379247585,4.98965979319586,4.98969579391588,4.98973179463589,4.98976779535591,4.98980379607592,4.98983979679594,4.98987579751595,4.98991179823596,4.98994779895598,4.98998379967599,4.99001980039601,4.99005580111602,4.99009180183604,4.99012780255605,4.99016380327607,4.99019980399608,4.99023580471609,4.99027180543611,4.99030780615612,4.99034380687614,4.99037980759615,4.99041580831617,4.99045180903618,4.9904878097562,4.99052381047621,4.99055981119622,4.99059581191624,4.99063181263625,4.99066781335627,4.99070381407628,4.9907398147963,4.99077581551631,4.99081181623632,4.99084781695634,4.99088381767635,4.99091981839637,4.99095581911638,4.9909918198364,4.99102782055641,4.99106382127643,4.99109982199644,4.99113582271645,4.99117182343647,4.99120782415648,4.9912438248765,4.99127982559651,4.99131582631653,4.99135182703654,4.99138782775656,4.99142382847657,4.99145982919658,4.9914958299166,4.99153183063661,4.99156783135663,4.99160383207664,4.99163983279666,4.99167583351667,4.99171183423669,4.9917478349567,4.99178383567671,4.99181983639673,4.99185583711674,4.99189183783676,4.99192783855677,4.99196383927679,4.9919998399968,4.99203584071681,4.99207184143683,4.99210784215684,4.99214384287686,4.99217984359687,4.99221584431689,4.9922518450369,4.99228784575692,4.99232384647693,4.99235984719694,4.99239584791696,4.99243184863697,4.99246784935699,4.992503850077,4.99253985079702,4.99257585151703,4.99261185223704,4.99264785295706,4.99268385367707,4.99271985439709,4.9927558551171,4.99279185583712,4.99282785655713,4.99286385727715,4.99289985799716,4.99293585871717,4.99297185943719,4.9930078601572,4.99304386087722,4.99307986159723,4.99311586231725,4.99315186303726,4.99318786375728,4.99322386447729,4.9932598651973,4.99329586591732,4.99333186663733,4.99336786735735,4.99340386807736,4.99343986879738,4.99347586951739,4.99351187023741,4.99354787095742,4.99358387167743,4.99361987239745,4.99365587311746,4.99369187383748,4.99372787455749,4.99376387527751,4.99379987599752,4.99383587671753,4.99387187743755,4.99390787815756,4.99394387887758,4.99397987959759,4.99401588031761,4.99405188103762,4.99408788175764,4.99412388247765,4.99415988319766,4.99419588391768,4.99423188463769,4.99426788535771,4.99430388607772,4.99433988679774,4.99437588751775,4.99441188823776,4.99444788895778,4.99448388967779,4.99451989039781,4.99455589111782,4.99459189183784,4.99462789255785,4.99466389327787,4.99469989399788,4.99473589471789,4.99477189543791,4.99480789615792,4.99484389687794,4.99487989759795,4.99491589831797,4.99495189903798,4.994987899758,4.99502390047801,4.99505990119802,4.99509590191804,4.99513190263805,4.99516790335807,4.99520390407808,4.9952399047981,4.99527590551811,4.99531190623813,4.99534790695814,4.99538390767815,4.99541990839817,4.99545590911818,4.9954919098382,4.99552791055821,4.99556391127823,4.99559991199824,4.99563591271825,4.99567191343827,4.99570791415828,4.9957439148783,4.99577991559831,4.99581591631833,4.99585191703834,4.99588791775836,4.99592391847837,4.99595991919839,4.9959959199184,4.99603192063841,4.99606792135843,4.99610392207844,4.99613992279846,4.99617592351847,4.99621192423848,4.9962479249585,4.99628392567851,4.99631992639853,4.99635592711854,4.99639192783856,4.99642792855857,4.99646392927859,4.9964999299986,4.99653593071861,4.99657193143863,4.99660793215864,4.99664393287866,4.99667993359867,4.99671593431869,4.9967519350387,4.99678793575872,4.99682393647873,4.99685993719874,4.99689593791876,4.99693193863877,4.99696793935879,4.9970039400788,4.99703994079882,4.99707594151883,4.99711194223885,4.99714794295886,4.99718394367887,4.99721994439889,4.9972559451189,4.99729194583892,4.99732794655893,4.99736394727895,4.99739994799896,4.99743594871897,4.99747194943899,4.997507950159,4.99754395087902,4.99757995159903,4.99761595231905,4.99765195303906,4.99768795375908,4.99772395447909,4.9977599551991,4.99779595591912,4.99783195663913,4.99786795735915,4.99790395807916,4.99793995879918,4.99797595951919,4.9980119602392,4.99804796095922,4.99808396167923,4.99811996239925,4.99815596311926,4.99819196383928,4.99822796455929,4.99826396527931,4.99829996599932,4.99833596671933,4.99837196743935,4.99840796815936,4.99844396887938,4.99847996959939,4.99851597031941,4.99855197103942,4.99858797175944,4.99862397247945,4.99865997319946,4.99869597391948,4.99873197463949,4.99876797535951,4.99880397607952,4.99883997679954,4.99887597751955,4.99891197823957,4.99894797895958,4.99898397967959,4.99901998039961,4.99905598111962,4.99909198183964,4.99912798255965,4.99916398327967,4.99919998399968,4.99923598471969,4.99927198543971,4.99930798615972,4.99934398687974,4.99937998759975,4.99941598831977,4.99945198903978,4.9994879897598,4.99952399047981,4.99955999119982,4.99959599191984,4.99963199263985,4.99966799335987,4.99970399407988,4.9997399947999,4.99977599551991,4.99981199623992,4.99984799695994,4.99988399767995,4.99991999839997,4.99995599911998,4.99999199984,5.00002800056001,5.00006400128003,5.00010000200004,5.00013600272005,5.00017200344007,5.00020800416008,5.0002440048801,5.00028000560011,5.00031600632013,5.00035200704014,5.00038800776016,5.00042400848017,5.00046000920018,5.0004960099202,5.00053201064021,5.00056801136023,5.00060401208024,5.00064001280026,5.00067601352027,5.00071201424029,5.0007480149603,5.00078401568031,5.00082001640033,5.00085601712034,5.00089201784036,5.00092801856037,5.00096401928039,5.0010000200004,5.00103602072041,5.00107202144043,5.00110802216044,5.00114402288046,5.00118002360047,5.00121602432049,5.0012520250405,5.00128802576052,5.00132402648053,5.00136002720054,5.00139602792056,5.00143202864057,5.00146802936059,5.0015040300806,5.00154003080062,5.00157603152063,5.00161203224064,5.00164803296066,5.00168403368067,5.00172003440069,5.0017560351207,5.00179203584072,5.00182803656073,5.00186403728075,5.00190003800076,5.00193603872077,5.00197203944079,5.0020080401608,5.00204404088082,5.00208004160083,5.00211604232085,5.00215204304086,5.00218804376088,5.00222404448089,5.0022600452009,5.00229604592092,5.00233204664093,5.00236804736095,5.00240404808096,5.00244004880098,5.00247604952099,5.00251205024101,5.00254805096102,5.00258405168103,5.00262005240105,5.00265605312106,5.00269205384108,5.00272805456109,5.00276405528111,5.00280005600112,5.00283605672113,5.00287205744115,5.00290805816116,5.00294405888118,5.00298005960119,5.00301606032121,5.00305206104122,5.00308806176124,5.00312406248125,5.00316006320126,5.00319606392128,5.00323206464129,5.00326806536131,5.00330406608132,5.00334006680134,5.00337606752135,5.00341206824136,5.00344806896138,5.00348406968139,5.00352007040141,5.00355607112142,5.00359207184144,5.00362807256145,5.00366407328147,5.00370007400148,5.00373607472149,5.00377207544151,5.00380807616152,5.00384407688154,5.00388007760155,5.00391607832157,5.00395207904158,5.0039880797616,5.00402408048161,5.00406008120162,5.00409608192164,5.00413208264165,5.00416808336167,5.00420408408168,5.0042400848017,5.00427608552171,5.00431208624173,5.00434808696174,5.00438408768175,5.00442008840177,5.00445608912178,5.0044920898418,5.00452809056181,5.00456409128183,5.00460009200184,5.00463609272185,5.00467209344187,5.00470809416188,5.0047440948819,5.00478009560191,5.00481609632193,5.00485209704194,5.00488809776196,5.00492409848197,5.00496009920198,5.004996099922,5.00503210064201,5.00506810136203,5.00510410208204,5.00514010280206,5.00517610352207,5.00521210424208,5.0052481049621,5.00528410568211,5.00532010640213,5.00535610712214,5.00539210784216,5.00542810856217,5.00546410928219,5.0055001100022,5.00553611072221,5.00557211144223,5.00560811216224,5.00564411288226,5.00568011360227,5.00571611432229,5.0057521150423,5.00578811576232,5.00582411648233,5.00586011720234,5.00589611792236,5.00593211864237,5.00596811936239,5.0060041200824,5.00604012080242,5.00607612152243,5.00611212224245,5.00614812296246,5.00618412368247,5.00622012440249,5.0062561251225,5.00629212584252,5.00632812656253,5.00636412728254,5.00640012800256,5.00643612872257,5.00647212944259,5.0065081301626,5.00654413088262,5.00658013160263,5.00661613232265,5.00665213304266,5.00668813376268,5.00672413448269,5.0067601352027,5.00679613592272,5.00683213664273,5.00686813736275,5.00690413808276,5.00694013880278,5.00697613952279,5.0070121402428,5.00704814096282,5.00708414168283,5.00712014240285,5.00715614312286,5.00719214384288,5.00722814456289,5.00726414528291,5.00730014600292,5.00733614672293,5.00737214744295,5.00740814816296,5.00744414888298,5.00748014960299,5.00751615032301,5.00755215104302,5.00758815176304,5.00762415248305,5.00766015320306,5.00769615392308,5.00773215464309,5.00776815536311,5.00780415608312,5.00784015680314,5.00787615752315,5.00791215824317,5.00794815896318,5.00798415968319,5.00802016040321,5.00805616112322,5.00809216184324,5.00812816256325,5.00816416328327,5.00820016400328,5.00823616472329,5.00827216544331,5.00830816616332,5.00834416688334,5.00838016760335,5.00841616832337,5.00845216904338,5.0084881697634,5.00852417048341,5.00856017120342,5.00859617192344,5.00863217264345,5.00866817336347,5.00870417408348,5.0087401748035,5.00877617552351,5.00881217624352,5.00884817696354,5.00888417768355,5.00892017840357,5.00895617912358,5.0089921798436,5.00902818056361,5.00906418128363,5.00910018200364,5.00913618272365,5.00917218344367,5.00920818416368,5.0092441848837,5.00928018560371,5.00931618632373,5.00935218704374,5.00938818776376,5.00942418848377,5.00946018920378,5.0094961899238,5.00953219064381,5.00956819136383,5.00960419208384,5.00964019280386,5.00967619352387,5.00971219424389,5.0097481949639,5.00978419568391,5.00982019640393,5.00985619712394,5.00989219784396,5.00992819856397,5.00996419928399,5.010000200004,5.01003620072401,5.01007220144403,5.01010820216404,5.01014420288406,5.01018020360407,5.01021620432409,5.0102522050441,5.01028820576412,5.01032420648413,5.01036020720414,5.01039620792416,5.01043220864417,5.01046820936419,5.0105042100842,5.01054021080422,5.01057621152423,5.01061221224424,5.01064821296426,5.01068421368427,5.01072021440429,5.0107562151243,5.01079221584432,5.01082821656433,5.01086421728435,5.01090021800436,5.01093621872437,5.01097221944439,5.0110082201644,5.01104422088442,5.01108022160443,5.01111622232445,5.01115222304446,5.01118822376448,5.01122422448449,5.0112602252045,5.01129622592452,5.01133222664453,5.01136822736455,5.01140422808456,5.01144022880458,5.01147622952459,5.01151223024461,5.01154823096462,5.01158423168463,5.01162023240465,5.01165623312466,5.01169223384468,5.01172823456469,5.01176423528471,5.01180023600472,5.01183623672473,5.01187223744475,5.01190823816476,5.01194423888478,5.01198023960479,5.01201624032481,5.01205224104482,5.01208824176484,5.01212424248485,5.01216024320486,5.01219624392488,5.01223224464489,5.01226824536491,5.01230424608492,5.01234024680494,5.01237624752495,5.01241224824497,5.01244824896498,5.01248424968499,5.01252025040501,5.01255625112502,5.01259225184504,5.01262825256505,5.01266425328507,5.01270025400508,5.0127362547251,5.01277225544511,5.01280825616512,5.01284425688514,5.01288025760515,5.01291625832517,5.01295225904518,5.0129882597652,5.01302426048521,5.01306026120522,5.01309626192524,5.01313226264525,5.01316826336527,5.01320426408528,5.0132402648053,5.01327626552531,5.01331226624533,5.01334826696534,5.01338426768535,5.01342026840537,5.01345626912538,5.0134922698454,5.01352827056541,5.01356427128543,5.01360027200544,5.01363627272545,5.01367227344547,5.01370827416548,5.0137442748855,5.01378027560551,5.01381627632553,5.01385227704554,5.01388827776556,5.01392427848557,5.01396027920558,5.0139962799256,5.01403228064561,5.01406828136563,5.01410428208564,5.01414028280566,5.01417628352567,5.01421228424569,5.0142482849657,5.01428428568571,5.01432028640573,5.01435628712574,5.01439228784576,5.01442828856577,5.01446428928579,5.0145002900058,5.01453629072582,5.01457229144583,5.01460829216584,5.01464429288586,5.01468029360587,5.01471629432589,5.0147522950459,5.01478829576592,5.01482429648593,5.01486029720594,5.01489629792596,5.01493229864597,5.01496829936599,5.015004300086,5.01504030080602,5.01507630152603,5.01511230224605,5.01514830296606,5.01518430368607,5.01522030440609,5.0152563051261,5.01529230584612,5.01532830656613,5.01536430728615,5.01540030800616,5.01543630872617,5.01547230944619,5.0155083101662,5.01554431088622,5.01558031160623,5.01561631232625,5.01565231304626,5.01568831376628,5.01572431448629,5.0157603152063,5.01579631592632,5.01583231664633,5.01586831736635,5.01590431808636,5.01594031880638,5.01597631952639,5.01601232024641,5.01604832096642,5.01608432168643,5.01612032240645,5.01615632312646,5.01619232384648,5.01622832456649,5.01626432528651,5.01630032600652,5.01633632672654,5.01637232744655,5.01640832816656,5.01644432888658,5.01648032960659,5.01651633032661,5.01655233104662,5.01658833176664,5.01662433248665,5.01666033320666,5.01669633392668,5.01673233464669,5.01676833536671,5.01680433608672,5.01684033680674,5.01687633752675,5.01691233824677,5.01694833896678,5.01698433968679,5.01702034040681,5.01705634112682,5.01709234184684,5.01712834256685,5.01716434328687,5.01720034400688,5.01723634472689,5.01727234544691,5.01730834616692,5.01734434688694,5.01738034760695,5.01741634832697,5.01745234904698,5.017488349767,5.01752435048701,5.01756035120702,5.01759635192704,5.01763235264705,5.01766835336707,5.01770435408708,5.0177403548071,5.01777635552711,5.01781235624713,5.01784835696714,5.01788435768715,5.01792035840717,5.01795635912718,5.0179923598472,5.01802836056721,5.01806436128723,5.01810036200724,5.01813636272726,5.01817236344727,5.01820836416728,5.0182443648873,5.01828036560731,5.01831636632733,5.01835236704734,5.01838836776736,5.01842436848737,5.01846036920738,5.0184963699274,5.01853237064741,5.01856837136743,5.01860437208744,5.01864037280746,5.01867637352747,5.01871237424749,5.0187483749675,5.01878437568751,5.01882037640753,5.01885637712754,5.01889237784756,5.01892837856757,5.01896437928759,5.0190003800076,5.01903638072761,5.01907238144763,5.01910838216764,5.01914438288766,5.01918038360767,5.01921638432769,5.0192523850477,5.01928838576772,5.01932438648773,5.01936038720774,5.01939638792776,5.01943238864777,5.01946838936779,5.0195043900878,5.01954039080782,5.01957639152783,5.01961239224785,5.01964839296786,5.01968439368787,5.01972039440789,5.0197563951279,5.01979239584792,5.01982839656793,5.01986439728795,5.01990039800796,5.01993639872798,5.01997239944799
