# Supplementary material for: Non-classical microwave–optical photon pair generation with a chip-scale transducer
Source: Springer Nature journal article supplement (doi:10.1038/s41567-024-02409-z), 2024-02-23
Supplement: MOESM2 [file 41567_2024_2409_MOESM2_ESM.zip › FigS5/s5_magnitudeS11.txt]

0.85442135984486	0.868812693536645	0.867009463370948	0.855091041823288	0.849118155713354	0.849897218669887	0.853587188486164	0.851913775493867	0.845628951243549	0.850427298123259	0.871659682812901	0.860818668083142	0.864647982681472	0.845602252723135	0.852095378155459	0.854992833603399	0.85212049441257	0.842940526832379	0.866222922384823	0.844030138556894	0.858141494918945	0.851781344846009	0.84198094165586	0.83609127221801	0.849426096326427	0.860030256350496	0.851194515599011	0.849776613274163	0.8397645067098	0.859127420869608	0.841886214176773	0.856750183822574	0.853909061075073	0.862704011633795	0.849650252111017	0.843818736186018	0.863779954994277	0.841423215898662	0.847321338756429	0.838078841152116	0.861978686187319	0.847288871939646	0.848710225370217	0.860937354412029	0.856616008712719	0.85974827526454	0.845115117115512	0.845123018888018	0.844692893405056	0.848943911668712
0.871090086712895	0.855636290527344	0.842026455298103	0.858042978789127	0.842863923671049	0.848282167851736	0.849649007920708	0.860087792105443	0.853139424783155	0.849731002966269	0.860959943977252	0.856184145722992	0.864044989089419	0.841084388350238	0.853019168159367	0.852204629628115	0.86928594476328	0.864783188846152	0.866000472968669	0.840232023361217	0.836996264566771	0.841484417618187	0.84910634390815	0.836329697220433	0.855963762883471	0.850372930064129	0.854000174100985	0.845438608777738	0.871041653170801	0.864192440009635	0.847481577510579	0.840108975400553	0.853407564438096	0.860956952359817	0.84524136817302	0.856621092459188	0.866345537334795	0.850772587579619	0.870254040726961	0.839342925133421	0.858719909300086	0.861264121289422	0.860230305807155	0.850047294718004	0.865456737757503	0.853482924943519	0.849451129775809	0.855447288927825	0.85082133486904	0.846845572139484
0.847830358584893	0.853781118934202	0.86141221544741	0.867173720017339	0.852469189313288	0.85325428716	0.861505413625773	0.845970613155196	0.845528877783382	0.85801296220734	0.85981065146688	0.853161956684242	0.865759358943258	0.862989553315134	0.84604471194837	0.848582451230241	0.869389217312099	0.855223268963591	0.856739110142231	0.863202540162512	0.861859684170323	0.868512337405755	0.853759464244963	0.855901679987519	0.850087148658272	0.877223149898486	0.857184343784787	0.86298403255193	0.870371628459782	0.855723025455869	0.849728705624809	0.828226047883388	0.854246677233762	0.852926956358807	0.846303436385421	0.853930983331832	0.866829803722604	0.857310183667838	0.860406780390462	0.849304919647919	0.856578779039461	0.8515680038322	0.855782722539192	0.851311073874892	0.840001026400508	0.84003049151771	0.861251458736645	0.86736744915993	0.857741580206846	0.84926218101059
0.841481999730022	0.859836367004693	0.851487551312129	0.863230535411559	0.862742394844004	0.847346227646401	0.855962191817837	0.871965009076035	0.840934839084156	0.8660623733896	0.868594976571936	0.846531012347195	0.869607699692109	0.849771933388702	0.852502089470173	0.848331167896754	0.853751803671308	0.86035293553589	0.848204398932631	0.85601576817847	0.867697873750584	0.853096626353547	0.840023709023025	0.859281409152431	0.840238049886768	0.862655470119718	0.838639394404128	0.834677172501672	0.843441754711847	0.858847068528788	0.860115465895402	0.840094610678934	0.854396551105913	0.844158627177266	0.858875024449841	0.838195836485426	0.855758455054192	0.84333528325935	0.840076395078385	0.8505024769038	0.850313019368844	0.861390350458823	0.846319348767772	0.846053737377084	0.863289226447728	0.836924768378684	0.853455116456839	0.856109623364386	0.854290861138744	0.85381551657066
0.85308029329267	0.843939380267757	0.85260268764464	0.849107308620108	0.859624903632849	0.839980283716123	0.857282238059604	0.862397040427167	0.84783655649651	0.843961100974147	0.855112357068811	0.846059481559455	0.829785820139525	0.876472442818197	0.858898714890083	0.849228579440312	0.840383891423354	0.865979151701096	0.844558298159981	0.837397256560125	0.835114550080799	0.838671139644811	0.845244239828863	0.841328194800064	0.851604172758104	0.872185852385323	0.850915492555356	0.841460938427122	0.855189393778018	0.84768070398066	0.857579948812251	0.847633754481327	0.859425699274783	0.838310941939937	0.835583679823503	0.835667383989131	0.859766790776377	0.853925628188705	0.857577971279017	0.840819825188558	0.856220269891807	0.839402854858449	0.846508518679993	0.82831404334404	0.844465364032219	0.838410272165712	0.858969345116538	0.834861142005872	0.854845991113649	0.85480295644949
0.863441315602111	0.864489658791738	0.838173624284639	0.866219583655952	0.851032312415967	0.862368278464485	0.844361995231546	0.863964665834475	0.838924121364631	0.857396002720665	0.841337162898	0.856638648200107	0.854600655370413	0.851813495215639	0.843939842456055	0.860218962132409	0.863471471299408	0.853247596280253	0.852960339858596	0.854046810303587	0.8640704395591	0.835273419601978	0.852417401714548	0.858951165296861	0.846596921337533	0.863185543282668	0.870991725625963	0.878485703952462	0.832230312220633	0.856791129908974	0.869978864964604	0.846036916110556	0.84567124645568	0.860033307397233	0.850517650962016	0.85157298803875	0.857474615902882	0.859230532164047	0.846289042885326	0.838678459096334	0.84549248645411	0.825168998754193	0.861198684948442	0.841332646732057	0.844109203939387	0.848923575486768	0.861575224686985	0.844413943446325	0.850310254329954	0.860577318664606
0.851413205692768	0.828517304345507	0.857732862310175	0.850410288859511	0.85454652386178	0.845810747755459	0.843112924358496	0.84112573357871	0.848622023942518	0.850065810178604	0.862676291915352	0.851043486574488	0.853775381057536	0.868678827065674	0.855915733722219	0.844382955619531	0.854621526696039	0.852906568001846	0.839985266518679	0.848357626367303	0.847983840690104	0.857057172774452	0.853831290476037	0.839605168163461	0.852097667867392	0.85347481197911	0.853167567354068	0.849486860956182	0.831512074239955	0.852297661469171	0.859268025645812	0.846920014757225	0.859300478869886	0.841619594390948	0.854257306745191	0.842113844439153	0.837633941493551	0.835618340084377	0.861639283925485	0.85437553743859	0.857615781474525	0.84857635957096	0.860264511345101	0.846019105639183	0.848148785877085	0.83169673475035	0.852001322071757	0.844649190927471	0.849905836926285	0.841116195156377
0.861839155080335	0.849429997235613	0.865486147624188	0.859218229984061	0.848749333773885	0.843033499254672	0.843103167298091	0.864947483584121	0.849555278297327	0.859746976941071	0.867458237866002	0.861584923807071	0.8497226549642	0.858938106441249	0.851003115201957	0.863848616640225	0.855745369018664	0.850705654722282	0.848808964427747	0.850549330536381	0.86254710659551	0.845111579233795	0.85826243979048	0.861252602525468	0.834657370274964	0.852178040977214	0.857292433418869	0.845738740964284	0.857776627770965	0.837214746853328	0.855484300064111	0.844358542573212	0.859516804580195	0.848619583120044	0.841677526781099	0.858312699940484	0.835556102361083	0.840547335825911	0.848716884071584	0.851518457061707	0.855117841101053	0.848077582197173	0.8467344156708	0.832323214500032	0.849555589981785	0.835921842014831	0.845759026354828	0.866234484472715	0.85078482247646	0.861304068090872
0.845700078607982	0.844264902479457	0.865270790981032	0.856174347761465	0.834698810161652	0.843971876891165	0.855138621224545	0.856329462196074	0.866638488206377	0.845748289663662	0.852608227942601	0.859111888939671	0.848778798404124	0.840007786269168	0.85680079468718	0.856978086099289	0.85640651804948	0.860540684251534	0.864160708434435	0.846885891255036	0.846349018512932	0.871824281368162	0.869331574371328	0.865094961007238	0.857358010646267	0.861938795398651	0.844275018335018	0.832914569482053	0.866914421808029	0.855433656044229	0.854100925307742	0.8545403420393	0.8446785932761	0.85599988525955	0.85969835641376	0.823563337170757	0.837759465164811	0.837838651860403	0.861501771692029	0.853701934293592	0.864818983791921	0.844402497800947	0.853793972006615	0.858819122557963	0.849523101244596	0.844078107685524	0.856236859579729	0.847908933916138	0.832646693473541	0.839283901952707
0.846633567259813	0.842347741010959	0.863691729291471	0.857585228874208	0.840651728991362	0.847328994740173	0.85668811028532	0.851310746321732	0.843769660011933	0.846900806763677	0.849228694158813	0.854012465199572	0.855804027199803	0.846184379992827	0.839850422445706	0.855150120722	0.863017674835662	0.851950486110836	0.862512276963878	0.843819408753073	0.862259336920517	0.856233951999082	0.857365407240526	0.844331159100083	0.849669197080705	0.857030884944109	0.859256685406632	0.841258619119056	0.855328605736693	0.853460179041831	0.843353027609291	0.845582916091013	0.854458608526813	0.843780569104338	0.843441533896024	0.847511993609515	0.85357610635305	0.848256720023357	0.845468787042437	0.858939266418759	0.844579876143485	0.851050609143173	0.845525438002156	0.847952967974565	0.847284626440596	0.844886674519431	0.85968285616193	0.844983485575683	0.844317374016461	0.856556478080333
0.858143835262797	0.835101768534433	0.848144540481515	0.852330280557348	0.837530775258218	0.849232224777445	0.837267213160465	0.841040234271592	0.862246554862196	0.845804397464643	0.85177552893167	0.845650259508919	0.856470743932047	0.855045022388067	0.862025497476471	0.865139568105822	0.857500400689023	0.860033424899362	0.847332396838282	0.846660005377361	0.864995421696762	0.860369777496541	0.847553377923748	0.84729370855568	0.855454669181044	0.863440621233292	0.862289601553703	0.843479937606163	0.856489171912868	0.851684359684079	0.839230686952115	0.869461552477257	0.852547191811915	0.858396302941264	0.85493588577042	0.843324113554931	0.842223254499341	0.844517606980963	0.848710873613629	0.837975297186762	0.861536257583302	0.859987871361525	0.866777783056706	0.856437226201542	0.849435816270275	0.852736692168512	0.8451942953066	0.855943724808985	0.84203919633355	0.845664743654736
0.851155301649801	0.841924284876424	0.863368075236094	0.840410434837084	0.848595755871885	0.838402412882487	0.830476523409883	0.84140984421166	0.844637412154145	0.826093802925985	0.856442044687586	0.862663003808657	0.845577985886536	0.870315253260329	0.84592857328176	0.844724585957012	0.849681760058421	0.84702195336268	0.85651148846186	0.844406369978795	0.853891926489355	0.857943129737721	0.859905299732851	0.845970725342513	0.85087556858037	0.850906629185419	0.852946083600412	0.847006957578063	0.842141203612311	0.860051500436511	0.839547599372546	0.835265156715453	0.848190537854096	0.850032240046744	0.859638465042362	0.845137736045223	0.845078367337319	0.844059650344236	0.840854524832923	0.843039703868604	0.852894606724917	0.850243441144243	0.853153013874381	0.835515029052798	0.868137278016063	0.846746343899615	0.847369382727465	0.857724674929656	0.837887849038231	0.854472917652016
0.861995541147336	0.857366331557807	0.837350983209363	0.85019367152025	0.849880420566832	0.862367887517949	0.870007371343644	0.845567182237895	0.838464875621649	0.845029425967258	0.865660779063791	0.850777320483066	0.8548948783877	0.862577995604584	0.826611661524541	0.859972828112841	0.84148895526484	0.854514282222713	0.861372904203667	0.846809848370553	0.856492978803718	0.848600232932395	0.852102548462694	0.851990827144088	0.858859204430139	0.841812015626069	0.844768954964329	0.856576167345326	0.864963540527665	0.846103290926578	0.858410301421222	0.831455229970348	0.849234196212547	0.846204799024848	0.85982875094085	0.856355044597302	0.845697329037531	0.84916278646742	0.854708565014031	0.844632692771981	0.857025817926315	0.84163520838243	0.852668759812535	0.847283390020765	0.867157951995097	0.862261543969946	0.852397556083866	0.847075758560195	0.835019064373355	0.851766642761753
0.844236829166462	0.846372984581766	0.843563770675237	0.864110512422273	0.855483193460265	0.851825682713212	0.858726471073316	0.849549543262483	0.860814397523308	0.842055468148625	0.863993855107826	0.855666930329316	0.846787063500564	0.867484988133399	0.852191857830872	0.862660188773582	0.853967808125037	0.861752054840325	0.845019343087002	0.852836735515099	0.844328823458253	0.866253636537398	0.853817034065645	0.848248243278049	0.850435257435818	0.852941143278531	0.84999624432639	0.843024696710409	0.836310774619664	0.848544062707168	0.850900094764967	0.849684975130402	0.85270100976848	0.856437129825605	0.829606745597666	0.851006683566446	0.847873027162678	0.849540990787379	0.843965276561822	0.854211093540164	0.84324997808221	0.848571786918751	0.847351507017054	0.843226070659793	0.847059330730899	0.851240593987196	0.849769532979621	0.855612520476071	0.844151928060583	0.856969756331551
0.849752319327051	0.856618911171924	0.847534598730507	0.833207220737216	0.856252655602735	0.835398524246542	0.860083086308108	0.854410678784142	0.855143742780477	0.845930859406968	0.843387655073556	0.847254179373446	0.847282258768603	0.844659760612742	0.850846066131832	0.851453737746362	0.853957706062081	0.855632172906184	0.839199876652696	0.862030397065773	0.852455652124951	0.837395724549626	0.854746454575762	0.843587375291454	0.848683009224232	0.858373419427496	0.844674400800064	0.834700858510877	0.835638663297523	0.854821559215629	0.842894055642919	0.86306736026355	0.863797695195932	0.860899728455453	0.843493740956436	0.840480214052314	0.85764063681664	0.853455835210632	0.85085161200593	0.862449186247932	0.861243009686711	0.847023304903746	0.853863001338462	0.838717342574848	0.845860960800683	0.845221877105303	0.850530959877031	0.839466904095161	0.842403444707449	0.839308806652597
0.857557882369369	0.853384301064929	0.862189693413911	0.860074134919251	0.848718305827552	0.833710763353746	0.862560812507219	0.840189565015782	0.854524528773759	0.843206298186904	0.838391324396539	0.85200700870841	0.853840774157869	0.850350356610924	0.839435344782355	0.855317772279767	0.847815646039532	0.837646304887777	0.849796359864152	0.855359669978883	0.838691170132901	0.840181355908668	0.864405364440745	0.84288307726523	0.854972780331405	0.854327058773683	0.836978647586164	0.869559150321461	0.840251301884512	0.850544738532712	0.835256851602436	0.843781607972763	0.851347211763723	0.850482227408105	0.854142983406078	0.856867928396885	0.836489115116521	0.848554731731486	0.836924454748772	0.85687264788873	0.855444837550808	0.855463502120158	0.843341691152861	0.83364177936962	0.839898799230786	0.838228897529821	0.848859599628489	0.849916533332343	0.849576122930166	0.848431046396963
0.853296625133617	0.83378000527478	0.836006050279828	0.842469393943154	0.850197687764251	0.863665077198793	0.842842493262454	0.855339135278599	0.852680961897747	0.845773221521465	0.860478637840348	0.842887669579913	0.858136515124781	0.85619014756884	0.846353541466975	0.856960877505658	0.849568034667015	0.851989208463346	0.840586493548451	0.848170817813699	0.857090022075759	0.823725672033501	0.848160421666942	0.838450975237451	0.855437854633423	0.8446820349758	0.845198673995301	0.84934382694356	0.863605745934777	0.834139956803748	0.836379997939424	0.847450851854116	0.851761821402078	0.852113823718813	0.855356324196153	0.846168939158482	0.848793068986787	0.839919232319308	0.84828351244409	0.851288088757652	0.857651985218486	0.842789298482323	0.859510147258184	0.83620862414842	0.8434037298511	0.839426361411918	0.845723001510936	0.832709389843263	0.841742573944248	0.845989846797106
0.861051851994177	0.856772509858204	0.853158525687827	0.854518025623496	0.853443211683422	0.849252828680522	0.847895387749362	0.847951109362867	0.833889333475518	0.859033253016216	0.844915633214439	0.847698883701962	0.840055090526836	0.856399985263404	0.841164674366975	0.832639501146006	0.840319258645239	0.841237578933096	0.832923264734569	0.837303164114319	0.847964076876779	0.846208965096903	0.86134451772882	0.860265566105577	0.865008703003808	0.845572314492766	0.838396326123843	0.855044953906811	0.844071727570937	0.826526008929074	0.855202110498691	0.842188102645528	0.851978354256516	0.865740145342829	0.849159269483633	0.848745122408821	0.85571558093075	0.851906820844256	0.874067475404544	0.841960732532538	0.862807571901444	0.85090202411139	0.830636651098958	0.841553663657643	0.844451606641339	0.849202110922633	0.846199499696302	0.848810719965819	0.845371940261376	0.854409023331547
0.847675705326666	0.837749213771169	0.857722453846842	0.850076172794088	0.840736970838904	0.849714304860065	0.860343884490122	0.854677121998737	0.841513728172475	0.842119258555655	0.844349976834952	0.835910305501701	0.824547018160693	0.859686660456258	0.859298378631634	0.853130827321333	0.845122538052559	0.842120120856772	0.84731624772987	0.859252198641124	0.841180690894757	0.846186322045846	0.840862860164953	0.836769609978722	0.862758558113177	0.843930399981027	0.838332259843325	0.841984722851646	0.858173881171372	0.836617721442824	0.837140868843988	0.845902986910131	0.864083966993181	0.861865594294936	0.845723531939678	0.850814490867126	0.853397946271022	0.836551896450687	0.867021725828525	0.857178790532165	0.837275468454113	0.844268759919902	0.848950845901681	0.851206931053317	0.852788689879162	0.845279453338567	0.845830338442845	0.855556420057622	0.839421021516252	0.8425976527715
0.847517342732677	0.847824749230286	0.842216615294384	0.858150159798987	0.843399984889238	0.850538533182056	0.851141365678084	0.864844302277644	0.85414685064546	0.851852776736905	0.859679660936206	0.840378044399238	0.843150617196525	0.854803131270907	0.856378280108661	0.854387725171429	0.84073729761242	0.842063709606441	0.84547049916412	0.854165212274687	0.873447150374809	0.836931151889651	0.83897983321708	0.864997521005417	0.864157058263427	0.849189602090634	0.842881386680992	0.85081107787474	0.846893473719302	0.854975005266807	0.855498301721403	0.849192416234305	0.849896234879814	0.847370941906417	0.850082796027738	0.846443473010392	0.83730621195266	0.834547622405214	0.848447606616527	0.862670228440265	0.851667799284362	0.861361394375895	0.862926079513299	0.838268697561247	0.850844142896752	0.842362684058575	0.844552868707653	0.857751126990018	0.847109789708251	0.857487706901299
0.84543117523705	0.855452157530999	0.874078020940871	0.848669161742243	0.846467573499672	0.840355334008876	0.854774743438049	0.867910384725823	0.842061974677213	0.847542357858857	0.858066751375579	0.848394893137749	0.871971414666107	0.852161041957131	0.851868095254654	0.839005148485396	0.861588823355915	0.843904360208472	0.85446420652978	0.845509646895076	0.86169870020667	0.856024108922768	0.853925790081631	0.848943689933548	0.85013959017323	0.85876210552311	0.841773314308756	0.847875353963984	0.855811711553481	0.849993401442734	0.831013261828542	0.826946003990224	0.858095837934053	0.845770467838411	0.835743591420913	0.840143856879721	0.84316787275255	0.848057613547233	0.846802347954536	0.844172066356539	0.860018595144289	0.861600484421693	0.854466110232238	0.842595267554067	0.843715783524656	0.844435833338177	0.855803814214518	0.843737437514063	0.849682041613457	0.857399452834687
0.845413914877434	0.847673506503936	0.848095940973789	0.85721268948147	0.858982670404309	0.855370962684411	0.8541682733383	0.836129647685746	0.85601917485331	0.849564967839244	0.842951077319859	0.852548855204332	0.856912655701273	0.849427973058428	0.844331725620201	0.836194793006918	0.85285484592754	0.84992225004244	0.850473667717418	0.858572119855491	0.863843624161731	0.851932460872295	0.857088634351901	0.852525823755921	0.853067495708649	0.841130982233888	0.840872939356332	0.852961515865226	0.84561670641949	0.843129959006257	0.859452886702039	0.86228673180285	0.860003612622708	0.859389979955344	0.860407250296749	0.834756292897507	0.866176866690052	0.842568866501237	0.853836378710724	0.841468658225297	0.853999821645846	0.842541559000324	0.852401393568209	0.829558733899738	0.849552063708415	0.853313235809113	0.856420878865047	0.854771835455668	0.84550305173497	0.852911321703605
0.847686825667856	0.849865542251294	0.862237665018389	0.855215403049963	0.859373583785558	0.846060604147712	0.840443995151277	0.861535984194982	0.857171313044004	0.849377083551902	0.847465652434768	0.864261411155152	0.848432597302157	0.853077808319656	0.857563265770778	0.85813877388805	0.836435011263575	0.849658458055011	0.858942017189678	0.845844583765426	0.867539764924255	0.838724425364382	0.830910535553438	0.838792134961281	0.859717723517338	0.8684777085039	0.847615203612249	0.838768813948216	0.828319326293484	0.850214720565176	0.839098837271422	0.851857125316644	0.856739758410293	0.844696283215505	0.843815927832385	0.850133583254758	0.837323457011541	0.841635464017787	0.861674963854397	0.84292131352627	0.845276869166903	0.861187935394686	0.838644225630614	0.833578157988704	0.84860218674794	0.859961417482043	0.85585281527218	0.844298704831449	0.84664401605296	0.838173449442229
0.855662997815666	0.856008546061167	0.852335176479124	0.843843045296236	0.850434125471004	0.846839220586501	0.85642133122598	0.83917115486191	0.861120106248887	0.840606410724218	0.85371509300731	0.847231979643905	0.85011457115517	0.859833223340982	0.86089972080553	0.842366238722361	0.86038501666114	0.8474979694516	0.858830553631625	0.874144047720429	0.853926328291909	0.857016616206883	0.850983538203963	0.84188844339289	0.856203273882305	0.852613794442997	0.848041885349108	0.838198738291409	0.85659718645557	0.852980163198061	0.851675621457845	0.858182595156639	0.863082350552007	0.86319600046912	0.847378630632595	0.844081904436398	0.850975217120317	0.844430919229797	0.859284785761256	0.839782694712034	0.844805924243924	0.851968913770656	0.844628858748736	0.845675415876648	0.846325413644814	0.856507717081034	0.847247616002571	0.844130012955189	0.849727422809766	0.848062189636222
0.842388152767015	0.846294394831456	0.844326079494469	0.850830249919843	0.843034873452176	0.851995724256397	0.849754707149738	0.845095212292355	0.855392828571816	0.847590149339654	0.846354602043131	0.84661294943064	0.870782875899265	0.839868852198398	0.863261999472024	0.838860829773205	0.844117245732979	0.847494764585873	0.847669219450152	0.84229056744452	0.84771573380077	0.85428289053473	0.84874748447177	0.861922153624957	0.858936789815613	0.8512580192493	0.851573907867555	0.83613366855458	0.852798379004409	0.833842140600475	0.83857708562394	0.853870948728012	0.838458436635506	0.844840516995862	0.844344054400466	0.845113922068277	0.835444827560866	0.86073992440039	0.85793292619991	0.838942291339108	0.836211296532658	0.85026598760373	0.846618370003164	0.822974586825539	0.86099718086921	0.847985047398747	0.843021056697015	0.846575694916749	0.871382610945835	0.838786597641514
0.855250891691392	0.850498726800273	0.850937953515702	0.844885037857288	0.855509312460645	0.855128302412692	0.855330950957576	0.860446269530584	0.848349503589661	0.85367447224417	0.854446799563166	0.846705273966145	0.84291891941263	0.850668629042075	0.857939989296647	0.848912870807568	0.829727394514955	0.844422862832629	0.848611102626529	0.837367940936116	0.838839466344781	0.846435415205855	0.848919757660454	0.840820340624602	0.854632275841019	0.859564511531525	0.839417824970461	0.837000313745382	0.845863673482359	0.852834558278674	0.84997263795274	0.830786472681653	0.85455256537439	0.849743622883776	0.844548958774168	0.823626369459427	0.842129415204862	0.858354620993925	0.853002808679944	0.834838931501632	0.83870704913193	0.847819682822211	0.847491549250006	0.833828169813551	0.854888319437301	0.844587558819824	0.858289012153498	0.842595375463549	0.866064726297724	0.845057971655533
0.853653691594469	0.848806650651614	0.838152793134949	0.843469064460803	0.853933917446776	0.856881250181764	0.843023525346557	0.858206020576291	0.85456100620573	0.844914185410532	0.848797021761303	0.846947788877419	0.853061382389671	0.851003118330396	0.850302710724194	0.848388957241775	0.85956656301332	0.849713546846316	0.842476258681901	0.862870976535174	0.842234226603175	0.84265941826823	0.853982112968434	0.843426793303999	0.841859546045796	0.849406148968377	0.857587117942481	0.853197867471235	0.841880504896679	0.829236517074897	0.8363977433979	0.848783494465624	0.856453918351455	0.830932210723968	0.852467602294544	0.857788968468099	0.858787904063268	0.846692132732587	0.839539420785691	0.833722393847106	0.856027179530182	0.843507866846359	0.85507025858212	0.846101108781383	0.838924414242982	0.853898894667594	0.836695302400608	0.834163053294302	0.847664649085217	0.856580398429123
0.8468301707399	0.853395994993998	0.840715859453119	0.846323646679105	0.849710600415351	0.849847344042752	0.837409979719085	0.856462920300956	0.850906457033156	0.838373018427511	0.841045089833252	0.851824762124103	0.85642659148515	0.858314434266601	0.838456722276719	0.85435941334413	0.85230957346825	0.845932778473321	0.854876369476994	0.851078232302027	0.857134204323713	0.827464795365007	0.854986639646082	0.849329961605827	0.869410231140515	0.853396935094126	0.84109914823691	0.84293453916973	0.832538713652085	0.831733988531165	0.840795123857448	0.85938283947131	0.848838801734062	0.852152327656568	0.857859043615406	0.859631946780321	0.852354575459164	0.843036067231224	0.853008661811661	0.854016986493833	0.846618295062843	0.835845397882182	0.846305123010616	0.84156328972262	0.84871362699836	0.841563660816347	0.836727054091815	0.836477012288839	0.85014989368563	0.847347995562145
0.845963540174248	0.84741333786935	0.850739145407613	0.829330958582197	0.837190336227683	0.862475990989132	0.833995361634228	0.842541106675496	0.827379559321738	0.85472630162498	0.836656744175384	0.860213626850988	0.861634203241592	0.856261834195673	0.858568532794562	0.854154048665239	0.863336699803358	0.848035604105374	0.853255215868471	0.854188610295533	0.84153782591893	0.828228210089677	0.84358517441373	0.843447281650424	0.845106746394369	0.851860851542834	0.85188520169253	0.846490437329769	0.830602738704574	0.8461977014897	0.854118448051017	0.843153069420944	0.84932586186428	0.865609365388225	0.84604606165016	0.854507652006592	0.836389931568523	0.839797807699726	0.851519365625411	0.846447519537048	0.836484876568658	0.838877408200105	0.844315823429194	0.84411997686979	0.852011323737945	0.847000906250394	0.852255359797133	0.838774781691044	0.837170269211174	0.837892220759659
0.854183616431655	0.839170313322469	0.836385167883045	0.848758985124944	0.849187955249796	0.857727143045102	0.871409976764619	0.839767164775562	0.858728440137971	0.844945247556499	0.844758038375995	0.875039242198715	0.852952578606148	0.849849652237451	0.840590083103038	0.850698523230892	0.854839560710499	0.85020274064586	0.850702530855785	0.844302802611026	0.83963982891733	0.844979484870496	0.837505864885303	0.837745990396416	0.863708057231364	0.838991014175731	0.837695270256151	0.846113309018976	0.857715656444112	0.852079978945496	0.852774002920688	0.842420848845677	0.860548344242055	0.84796618637429	0.853351852484616	0.828868453828185	0.8550852876222	0.845321601709693	0.847692835175215	0.840974616549152	0.847241943713054	0.838037229799392	0.839854610896002	0.8542667468937	0.847663976489341	0.82639137422942	0.862838154922946	0.849807413216001	0.844428471724058	0.836587068179255
0.849076383328825	0.852463601193827	0.835127698144262	0.846253653029718	0.848079384529373	0.844889693758923	0.838610833823696	0.844800593050946	0.85776720371068	0.849134143787826	0.848372544023683	0.854317734611339	0.840707853291062	0.842547093395621	0.836013090693306	0.859199078598941	0.86126115957181	0.842437548358142	0.836045658565976	0.848053831510565	0.855981489829288	0.855901436953294	0.847685331222572	0.840300005999691	0.851502186352586	0.843420368206517	0.834815973093854	0.84665825461517	0.84056175995049	0.841668456217332	0.835997983103837	0.842636205571026	0.853575557029747	0.848428831992908	0.84705660504853	0.85090931313304	0.84604204393168	0.830660445764938	0.840562824745153	0.828362756456617	0.84959235354796	0.833674471568972	0.853336555270487	0.832766080227314	0.837932119348885	0.837392491343898	0.844252752997974	0.847958822771999	0.851772838063978	0.849603070537292
0.853853342103539	0.848795072495475	0.86344914660572	0.830369564684881	0.848296480812891	0.833164881857353	0.852234295176627	0.844081197529964	0.833230898950364	0.86403290802399	0.84464085058894	0.843001622763358	0.852215756893293	0.852086323690077	0.846879190623263	0.853341989250732	0.845019173552812	0.860070690127413	0.844396211524448	0.848384372853857	0.85609629940901	0.84414960289724	0.84316775948771	0.858031596173243	0.852125318813358	0.843089728047135	0.840095480569146	0.839337633660321	0.842788505409885	0.844472305293395	0.830294284438611	0.848144575257479	0.851060314184451	0.840062098664046	0.83064815304129	0.851515384957916	0.85197403389217	0.848288533873356	0.847878858423578	0.835707476007042	0.85221270447224	0.84831686636354	0.866790723036031	0.840744666939862	0.844326087600333	0.844606265183515	0.848465511212947	0.849776916351246	0.832073447507767	0.857685955283598
0.846686844115047	0.850751611366188	0.840785002987729	0.841725113795962	0.850869242558652	0.83624881956234	0.840137491944605	0.844176872990585	0.850987115608282	0.851175215543826	0.837585158575833	0.850203523855264	0.853109869652784	0.834121349304804	0.848287080995245	0.839666471103881	0.861719155735456	0.848579004781202	0.841582089158238	0.840274722085213	0.851088882207134	0.848375073257407	0.849387410924369	0.83548353277314	0.838100796266156	0.839647153258046	0.844286610136514	0.848503169523024	0.857331065687946	0.836191495358947	0.850663624675422	0.840265012356248	0.849238541877551	0.848172413445563	0.845545456500584	0.848251545166949	0.858393657524869	0.848109453636674	0.826990060217494	0.866872279676066	0.853704503666278	0.850183794019096	0.84082878566084	0.856361433598275	0.841989853246616	0.840481996453908	0.84985848447493	0.832104418217909	0.841685713331662	0.848377453345965
0.847449586987901	0.829468120998839	0.84319671170517	0.846723687302026	0.854542368004977	0.845087472009406	0.842390107296209	0.851871036921226	0.85390181984838	0.849671357867811	0.854948601600941	0.856331934033499	0.859381464539504	0.839401466413473	0.859629089841683	0.840783434018344	0.84750177632678	0.856053019667826	0.840870239753198	0.847205201035764	0.859716397665169	0.840953886897469	0.849355998842296	0.857447070742691	0.851525056731557	0.839628622791599	0.847093413263373	0.848603817444568	0.843995712768671	0.840058605276207	0.840435625229997	0.845785094834693	0.835518236148552	0.850146356537381	0.848019779578687	0.849450721494103	0.843073237379041	0.839056593044422	0.847070170801998	0.832876535888484	0.859084843352752	0.852439202129705	0.844031451899257	0.854027596965523	0.836387061641125	0.843210763298382	0.852647279828695	0.857106997853117	0.840871562161689	0.838480889877542
0.849412843353732	0.836999996221355	0.851592766686796	0.849157822430361	0.857159695798965	0.852179084816654	0.857778729486043	0.842833491984082	0.842591951351371	0.844180514048169	0.837657676779839	0.851690744503327	0.847951498031868	0.860939844519329	0.841236840677576	0.849516114101919	0.859119921768218	0.849239530391383	0.871845346765316	0.851828861555918	0.83680600695369	0.846957417983163	0.839631745848474	0.826664269903369	0.853323014433566	0.847714222669808	0.843211860543312	0.865816151264639	0.856168962736494	0.855130062358572	0.835328394980234	0.833972815532487	0.859482149439417	0.839683136221298	0.8399030054624	0.837092447060135	0.864357167517324	0.860676829178699	0.854606387086832	0.861053136219022	0.841349333883272	0.857249155336952	0.843663268182618	0.849421569880321	0.837368366439949	0.833979588644817	0.855133111519712	0.854970746468237	0.8445509373771	0.830267949015007
0.85185738995767	0.833998255943767	0.836678467642395	0.855521307847241	0.847758851195117	0.844776680140011	0.850102487350589	0.850543086067998	0.840268172514639	0.82406972411937	0.856532938971392	0.832319178642046	0.854601073133359	0.848036931485493	0.846190609043148	0.82932739242985	0.855082012042124	0.852372293210917	0.858750768702017	0.829680744442262	0.859788877827437	0.850887462308175	0.833054138268403	0.83796136760255	0.838548590910741	0.847615503385585	0.855993021680333	0.837308524281338	0.864870121791675	0.850009282669732	0.851452574174752	0.846274651270138	0.856172116820701	0.848329559185592	0.843433517703317	0.842818863382926	0.867528270302825	0.834424546051759	0.850997312786225	0.835955419582976	0.841270476541391	0.840739830869132	0.823746036137308	0.833825811221464	0.868403467819107	0.848213235820771	0.844454457256024	0.823798629328633	0.838418709252203	0.841451038792839
0.846096219201769	0.844187304524099	0.849691345922935	0.847966393098087	0.834168649575209	0.841671091446632	0.842728729127458	0.850962028657364	0.842142498357207	0.837975313118351	0.836499539920236	0.850801010315125	0.859781934764985	0.844109537542584	0.84390137329372	0.852387380513762	0.850384595197366	0.85023026337026	0.854454546233444	0.847713421431156	0.84990429003988	0.86948688828511	0.847770164495913	0.84514952275757	0.852304321615626	0.84607319235676	0.827481199015708	0.84772960074416	0.851899800715622	0.854293827703356	0.831834129419917	0.829632338950534	0.840826723561499	0.845953252263443	0.829540402650563	0.834703442874474	0.852447471485724	0.833841153144565	0.852150918187049	0.849172510982738	0.838874206422498	0.840550462275275	0.834111457767984	0.840706945227754	0.844144934480332	0.840990118083381	0.85024711644648	0.847331712478859	0.852393488110193	0.837792980484796
0.851530246776809	0.847383074568604	0.839906850451771	0.832630007049352	0.845861844534223	0.850272792964439	0.847419410125198	0.852144490625335	0.846362791944776	0.837522516879857	0.845833679807162	0.849833895155678	0.850238936205339	0.84645104353196	0.86017058398135	0.835329597093538	0.84236399287411	0.855731756065238	0.840105937809998	0.838920711913158	0.841532489898416	0.868891503748659	0.850292650442918	0.850485912573069	0.847032485364175	0.856386851212608	0.852034011188888	0.841491037298722	0.848411966676694	0.844392509260849	0.840499754085419	0.826106274126567	0.850652390041185	0.845868484964065	0.850701390558965	0.831339288408156	0.839515871590831	0.84983939508451	0.836100050656361	0.843514252000628	0.848249091892909	0.843958730146405	0.849392538046323	0.829671973376757	0.836634339247782	0.836036751389083	0.855599763048086	0.851450476605493	0.840283257737009	0.852862276426393
0.847106867032294	0.846463938311675	0.839299637976646	0.859331245736731	0.837098561579066	0.829968171368517	0.838385523935368	0.842358149291116	0.838970217530461	0.854708900954331	0.861423183829964	0.853258806319615	0.836083853477433	0.859887172386828	0.847329438473508	0.84644106216447	0.858417634400581	0.83224738866701	0.839642939294301	0.838568632549752	0.844095709142159	0.855590692157414	0.853510309960362	0.851008760796298	0.85161430881273	0.844181321533799	0.847312480644072	0.843426509103105	0.866236266058396	0.844212309306299	0.835813143032485	0.845098238589872	0.848589553693638	0.84978309769819	0.848896834287892	0.842910454168704	0.818890598973659	0.836636101423202	0.822684552105455	0.834052207945779	0.844393879886678	0.823420092804053	0.853990230808652	0.831971737788228	0.858624539031492	0.848348914067691	0.850056322152106	0.85157130060462	0.844210658752139	0.857308095437316
0.855583054260622	0.840800097792322	0.84010567320042	0.842235722876481	0.835913251487344	0.836491732815792	0.832725566873906	0.853158006534566	0.843290780854213	0.864938750257257	0.851442564659302	0.84795444401685	0.861471184547435	0.853700128672923	0.8586194468312	0.841644269432795	0.851770414031187	0.841711133028266	0.843258654371013	0.853460041496822	0.840866430682133	0.851163272704472	0.847814866985058	0.84115971787363	0.846488159113227	0.866636091531224	0.834527597935699	0.826041125649153	0.840075784973146	0.845236584399072	0.84886599013371	0.852075510254644	0.85303675495192	0.850016041313279	0.852658183714474	0.830122466026452	0.844081640971874	0.841790524696444	0.851819801854223	0.840309010225708	0.846027682636607	0.849194373372871	0.835974853723758	0.833914032772143	0.857635913316248	0.851431110180112	0.864983227643309	0.861308068265656	0.843280644127275	0.851299295584853
0.851379386359737	0.842773844649011	0.852636421569018	0.841280376156311	0.840589970079928	0.840328242236958	0.853956609704263	0.850919292862446	0.841746318368031	0.849097497956282	0.849957163288575	0.852442047693264	0.848498066158959	0.847084909377611	0.853088484137151	0.849145037961904	0.838092720168241	0.852274843913868	0.849370155888633	0.849187394263618	0.846902682958265	0.855605288336228	0.843681669160964	0.849039741371655	0.844351500801883	0.85252999338659	0.840947519767535	0.837729871103711	0.856767507609402	0.840556575586096	0.847194201994569	0.85904216284704	0.849755303756648	0.847200400128848	0.8309507711692	0.832406288081238	0.848018230346497	0.842057042301531	0.841486331521918	0.837128103474663	0.852179986658694	0.851053439113494	0.840459775103947	0.840348587322055	0.842866636331206	0.854480928020429	0.863802020361941	0.844433474212553	0.852620274742508	0.867796910044802
0.836474663282249	0.846882053740816	0.842902457743443	0.846421272588249	0.843340607302989	0.843808145004614	0.835345513718377	0.848722107236181	0.849083497636967	0.842440725941843	0.851216003959673	0.842540127150537	0.844546689553987	0.851582519356661	0.848532319426754	0.828650118556555	0.858588824757753	0.840188602751845	0.853110482152669	0.83122302887512	0.875624381961428	0.850881833846285	0.855639399326418	0.840443470225482	0.831299502044642	0.850649878203471	0.849787101959443	0.843404576239548	0.854933603650701	0.859149054050873	0.841571860785634	0.842185569743319	0.831309354788607	0.851135549934917	0.835343750066118	0.840310307968862	0.827666393160647	0.844944541228951	0.840628892496936	0.840473574158444	0.844922243717373	0.826934938095977	0.852086842261643	0.833578864662416	0.838066957765748	0.839812109002489	0.844933835030568	0.86039505484639	0.841493688870926	0.84671569271924
0.83055828222922	0.836663669368688	0.841748399347178	0.834389408998322	0.851734768934916	0.845356251052043	0.857590133466628	0.851922099365974	0.839132819502484	0.848231945645555	0.832324479228898	0.832382524663005	0.862965408627534	0.844987505323518	0.829943287974302	0.847701287494738	0.842798516080531	0.841491118818129	0.842471660779296	0.852052133668635	0.848324304158577	0.848916995221336	0.862413676942931	0.849920862546083	0.839561465249916	0.838331219293744	0.839913172526075	0.833897653504963	0.854735065883959	0.837546221294748	0.835697708954725	0.84037810900063	0.844062295579977	0.846865608248544	0.849674773145058	0.83898882020268	0.83712464076737	0.842812982898403	0.851064827644843	0.840213317281351	0.840537957141404	0.82378281498475	0.850244713037095	0.827190641018871	0.835176946914999	0.83979875122235	0.855344160066855	0.847669556519169	0.841500022305797	0.835989746061838
0.835486445195826	0.844202487586611	0.847971511304768	0.841635193239767	0.866412666569149	0.840827674919813	0.843655529548116	0.838503965085005	0.844110373915662	0.848816524564969	0.845192331933615	0.850475480956792	0.842720174186001	0.834542055311155	0.841809989144552	0.831612306642596	0.85335494954126	0.844179610012348	0.834492558483268	0.835230121725233	0.851196048072572	0.858455653469681	0.846715317461486	0.850247750290762	0.836837977769323	0.86839343993531	0.843958109715601	0.82745832586437	0.848265757317909	0.843596178263085	0.843005531563863	0.837665865892853	0.84517156922177	0.850369392222976	0.839666414486739	0.842407503753941	0.850861520944189	0.835293116226411	0.853142830008687	0.837431929623079	0.824163651924255	0.821227558420611	0.851634647714868	0.847514037484945	0.836890637164599	0.834345941493382	0.844173260353639	0.83441501256099	0.843906351132911	0.831477321844751
0.840733325172911	0.829551415770175	0.82474693728868	0.844297041811596	0.841759962309128	0.834363899941782	0.840426207207288	0.838175077256761	0.852801254708125	0.841898313867998	0.855797906285799	0.843891345729479	0.8396134822036	0.844053973705831	0.845148558577294	0.859476989499585	0.835055001807676	0.845581369585262	0.844920610467919	0.839339783254736	0.842071710841124	0.842888449434516	0.850272090564664	0.851432044660026	0.859231299606365	0.844087265119199	0.840284853461689	0.849788724124815	0.836194773096476	0.840690390858324	0.840370274973053	0.857300768846634	0.846722345781998	0.853030940538998	0.842904935598834	0.846092771986618	0.837334340552291	0.835041505706893	0.8395524547647	0.834760851694944	0.845365458489694	0.839491775091357	0.847710487888122	0.849173738615432	0.869287709708159	0.838687624584065	0.849863101028231	0.84682152147233	0.834307968628448	0.845417898800714
0.854499811702221	0.834661439054505	0.837558595086068	0.836009573051011	0.840670407444933	0.848185984007389	0.855532740468359	0.843794857119835	0.848976248246522	0.842884053678354	0.839497266589059	0.849322372552811	0.848284167843335	0.845569418315407	0.840982303408079	0.864208632998987	0.849363461504412	0.847384290012255	0.813387769217085	0.839818494748878	0.84260358362984	0.840387919432676	0.837731990815775	0.839350075366332	0.861219732716855	0.852338438041078	0.852838084503087	0.844305715959231	0.866471886400354	0.850565682749483	0.854190053494889	0.850240595286825	0.833239612660228	0.838580323178637	0.83123948467147	0.842038448472168	0.839721661399331	0.838053434517155	0.852711311047486	0.842059495294265	0.855171100028934	0.841585078249343	0.839959666390093	0.82446051070284	0.837165731193591	0.842026543797499	0.828883440072766	0.848219115722403	0.843126030016689	0.848732168555362
0.839576558917066	0.850617266704569	0.838848327936303	0.857520748570086	0.851034100803811	0.854589415531415	0.845420164223874	0.835784779566482	0.845087059214333	0.835005505757779	0.830648855340777	0.847008323477673	0.854411730501104	0.856001718966706	0.837183441652111	0.849335255293085	0.849307705348887	0.855816810949179	0.835816000751903	0.839196818818241	0.856046925686132	0.837905825024714	0.849760555939305	0.8671765945195	0.850325728125348	0.836837813185683	0.850680556686591	0.838211326275017	0.851509930219802	0.842296921708619	0.846595523840826	0.838307043342412	0.832101958220555	0.853014318801094	0.843755298102078	0.844933190041811	0.83960198414284	0.835097806466409	0.855420056730694	0.850789712001493	0.845120606285091	0.84775114173256	0.823662866525035	0.838336990118162	0.833756515987969	0.836850750756424	0.849012547971086	0.84363473440086	0.844939631044546	0.844501043790502
0.846045732874762	0.856876803945451	0.846460455382613	0.822930594957315	0.859466985310041	0.846407917265717	0.844716983953621	0.840070736423073	0.835245400862725	0.845254245516151	0.830731765170317	0.854459610865035	0.838874883319815	0.847204067795195	0.83264493532247	0.844433256908762	0.827275533201776	0.841831485989725	0.838630457925583	0.839989730763708	0.854343756189934	0.834684609153108	0.841236711093057	0.840124258568303	0.848556807883367	0.841362635127241	0.848192192833425	0.844885282022231	0.841612095322678	0.853873893438027	0.840505474171836	0.839249294423614	0.848199891466181	0.84600806171866	0.837997164851288	0.833170307221642	0.853973739059705	0.844459336470956	0.84235994937241	0.830089324418888	0.86229606584511	0.844395350720025	0.842598830260872	0.84034189643843	0.829087974246691	0.835425388095525	0.858494047619196	0.84095604397154	0.84883254412329	0.847875938675618
0.845699303298044	0.857175347478928	0.830323911281204	0.842334378484643	0.841529912913057	0.844746002872358	0.841376741345066	0.842985618724347	0.849050031899575	0.846773041369319	0.830280131762686	0.836328400614926	0.843266020917862	0.83270120762316	0.844864107271574	0.835848155546712	0.863040353225677	0.824524763974528	0.841389082749167	0.840583323636741	0.83884353325282	0.846666244573185	0.838570871499112	0.844366613194456	0.847221327591882	0.837862101805873	0.839214357725299	0.841525197684953	0.832530606353417	0.826224157336414	0.842468591057764	0.850015102724614	0.850510621506487	0.842500501514771	0.846673401386824	0.847421725628147	0.848727540613811	0.844086523213562	0.85629087399407	0.840419085059295	0.836570071054695	0.837916039320519	0.828394096531121	0.843787585268034	0.844668200352122	0.848850322390082	0.834035245245296	0.843216003848838	0.836075834845772	0.837748964219925
0.85615499744365	0.829075259101531	0.844704423624642	0.837253418443425	0.827525428064162	0.842457123025948	0.8471266968935	0.836846073717513	0.858343868102393	0.848801391694658	0.841123718355478	0.844289266251502	0.839259832429928	0.84914114912442	0.838472225809102	0.857495859300685	0.833977498210879	0.834701976206599	0.854005014516115	0.834827788228337	0.838027177893691	0.845744871265073	0.833460637199931	0.836807245048928	0.84953298492859	0.841017707620346	0.838459073225294	0.848309354406651	0.846970350187993	0.850465823312295	0.836738968035633	0.821434603481678	0.841264046552463	0.837905842303432	0.841561548627315	0.852261910711855	0.850500349162785	0.843003421176586	0.843537773083634	0.853567734368288	0.83769840962451	0.84943838115655	0.842741684459031	0.8363174892274	0.863274426749088	0.852433690576214	0.854505722252851	0.845863441496129	0.841527929542585	0.831440166656163
0.838039082611839	0.830972500076391	0.839196583783502	0.854298811573335	0.844481855792008	0.84072957906613	0.846827513596341	0.841250133752835	0.849345800008137	0.846000121512008	0.856387398884072	0.845674089240928	0.847165259959315	0.852735381163806	0.83431491984151	0.848157680533442	0.832366129927874	0.853526916435495	0.838682088368516	0.842045678104999	0.840679335375766	0.835113066376234	0.849692764862951	0.830392914694335	0.851115091245951	0.835289417356428	0.860821681566282	0.851177162462279	0.838775926474057	0.842243497326931	0.825113842198891	0.831869881819056	0.85746388702871	0.85140683572117	0.844143689820843	0.844793035621685	0.841313949190551	0.836329442956913	0.83845872875081	0.853039620568893	0.845766262738552	0.848780211190611	0.84623462798789	0.827860541081131	0.854380848377704	0.84659060252824	0.83021202419401	0.841794949899697	0.834894396570503	0.836501309109602
0.841732613131188	0.847411224030055	0.843695440637075	0.846018330894649	0.845868049710512	0.8597310753601	0.848727960432394	0.842805085154611	0.848827251378944	0.852809058611009	0.837819633848197	0.842426978728768	0.836687230861588	0.854174639637908	0.835605363225999	0.831091578838625	0.849118553334038	0.837472035607191	0.855729191755893	0.836092651944739	0.847368029618833	0.855905371943556	0.851058628719772	0.846277588978189	0.846242752803388	0.829651146711626	0.834080712793189	0.851572985805441	0.847538525822245	0.85440338353255	0.833541484039723	0.851693802064515	0.844017365974314	0.828388838493921	0.83908608185599	0.846725189345862	0.825199192305124	0.848512507335943	0.847577918341711	0.850440432791999	0.847039016753541	0.835914574545682	0.842298774775714	0.861521407701844	0.830466293204113	0.847286706838705	0.839694580441989	0.834377806763084	0.847650735691374	0.832356754876195
0.843569827874645	0.844291279966986	0.845194138704643	0.82904034484544	0.841493248932218	0.846284210184921	0.853811099754685	0.843612888731189	0.840613403030156	0.83491366306553	0.841665661577523	0.844258145628242	0.833251882188961	0.848100388578303	0.850390212370574	0.851772637487429	0.837098950732544	0.83888148225232	0.834321727963297	0.849059154252951	0.855947004411383	0.831581513135547	0.856987459614358	0.835502897745473	0.833862030227741	0.85913438336204	0.84050315591449	0.86309466372069	0.848206988822084	0.83638213097507	0.855463717884587	0.844480916238066	0.84503766499207	0.852157284644333	0.833798103835769	0.826996350455915	0.829566677570312	0.853608167743416	0.841885301950965	0.834670918380583	0.84660589330966	0.843157631881708	0.83751131580286	0.837126366073401	0.830460926012396	0.84407284404831	0.834347776058311	0.844601105311173	0.854254451793773	0.836523600107866
0.852813847946836	0.861194684135074	0.849504334808673	0.833067903826383	0.85178524448223	0.837275363189986	0.847824854665722	0.845919475135436	0.835503782037253	0.837622583658924	0.852021833445466	0.837552771608819	0.838363154519221	0.849932840491482	0.83741176442922	0.84600205819977	0.840844322405925	0.840801989276596	0.832588093908149	0.841098835143433	0.850035718036527	0.844222005675781	0.846183875204932	0.850981673772918	0.828237367327872	0.837009379755051	0.835165219747308	0.840377265461383	0.854769511068069	0.838689406944189	0.8355816972782	0.840794153944836	0.862069428158668	0.849647872201995	0.846116948469616	0.837419329095152	0.844944342908827	0.840110177916945	0.842298547104561	0.83991644070925	0.837828288451454	0.84926410951302	0.842781084552153	0.835265818440507	0.844891796343512	0.821663733646082	0.845425997460071	0.839623601243488	0.843268979144751	0.850813946588201
0.825981738787087	0.851208381275685	0.836556331830833	0.840411098352365	0.843761680490194	0.84639269717827	0.8312545079324	0.845459661485666	0.858564312179039	0.835117984261529	0.859433287114218	0.857516740786389	0.844518818964275	0.82944634355599	0.849473544054148	0.845089093387396	0.831842943699399	0.834478651910942	0.831994550028047	0.844840755539673	0.855675270419687	0.842066762483089	0.840121208057346	0.856781944188247	0.846341436367829	0.847658143613557	0.838441283864051	0.852637955084857	0.840892960217551	0.847640788534008	0.835960737934533	0.843944808958734	0.846344960391104	0.834105725158358	0.842548588455031	0.838456024448266	0.84265644090532	0.840546928266484	0.843328953658183	0.847990798309079	0.846000838599887	0.85162843526099	0.845852865832283	0.837709532459141	0.838934312989916	0.833283729199562	0.843224604524208	0.833263796103048	0.845933966259378	0.831525125976176
0.842332420598493	0.833857402365066	0.844904249611398	0.827824082379948	0.840495981567692	0.850178915068877	0.842279324648184	0.837719217762179	0.853913274123561	0.83997385004426	0.846888677997856	0.842347365807169	0.832060117729124	0.850071376450446	0.85732124828213	0.829564391721577	0.842967112283126	0.843137230922985	0.847424724692962	0.837917108507283	0.844482710204018	0.846778811860991	0.848562762609023	0.840989384658287	0.860663899603613	0.846146861386538	0.834692630580452	0.836169959852432	0.836004496609534	0.818859300750096	0.83373908399193	0.858668773417133	0.84501852549952	0.844335770785551	0.837623601451492	0.835592722392765	0.837066719444787	0.851684315299928	0.867388107545673	0.834799430928484	0.831923058328644	0.849365205734069	0.843840235703236	0.855470475463451	0.841638546445193	0.860431628506027	0.828055270558264	0.818872335512965	0.847495431872656	0.847537978522337
0.848260531499354	0.838656069783468	0.835330025420682	0.827060628545635	0.834518281532994	0.841688114352201	0.824221572953419	0.853692309270058	0.840343617339478	0.853309787822632	0.840718156302287	0.840607945472099	0.839216180519041	0.846872733590941	0.841402752933367	0.84757830952514	0.833590766331884	0.850956385917971	0.837370878971144	0.846377926886484	0.844122525744529	0.833181802816751	0.827810854319793	0.828015905039017	0.840676155815426	0.844024351312921	0.852864202633319	0.831845934718868	0.832669608462974	0.846484684840691	0.836069599098776	0.848673602156817	0.838765952642423	0.851151640967161	0.843103888485415	0.854648623824216	0.842224099828054	0.849708938557079	0.834142899072621	0.839732336179893	0.847283802609313	0.826782235825596	0.845406356810074	0.828144538404903	0.828253260944204	0.859550554298129	0.83784250480329	0.841210103942635	0.85140912884663	0.832882931193011
0.856461327176735	0.842904214198958	0.83326023921309	0.846192357752001	0.842877908217957	0.853735153839091	0.828690234397908	0.842435450377796	0.85033479290945	0.859116543981706	0.837806115673883	0.852994517617445	0.863347595275144	0.841031007390101	0.840456317146438	0.846613275564366	0.841273133777527	0.848100475071375	0.850973058371233	0.855292705937267	0.838141338061027	0.845788444734871	0.843527891437243	0.842331976270427	0.832955634666605	0.844191148463541	0.843965728971036	0.834590544633314	0.835308172522151	0.857904135516581	0.831373229404879	0.836743828880346	0.853620523691673	0.838710501833614	0.848776017624468	0.845959028686051	0.835669824113359	0.839116389730475	0.859749765558181	0.85251410157576	0.850931132561213	0.83980204784742	0.830538624775701	0.836017509128412	0.839150198086508	0.858620823417165	0.833597232946768	0.837844128223096	0.84030103001189	0.840557148824189
0.841902015731611	0.836896449924626	0.836222920131864	0.829070072926889	0.843228846837292	0.842654822782698	0.844527453290679	0.840419913095919	0.840366187068983	0.848316602394062	0.852141478928745	0.844659879814962	0.865481401995201	0.848170420628585	0.837150477463552	0.859965159119765	0.840895068952344	0.835434869685994	0.847811582533811	0.846471549709818	0.839971995206007	0.839244255648694	0.843433578050754	0.837583824437753	0.838008270819174	0.851267291597385	0.838612542674879	0.849361013533323	0.836431592548374	0.849788747701864	0.837495703166668	0.848275258123001	0.846941454867054	0.829511164538486	0.840701041513298	0.837779521800368	0.853663354115922	0.833951874893648	0.853456390917007	0.844171442004175	0.8451420879718	0.830025007108775	0.831966502168595	0.835616504663387	0.838956962198864	0.847511087071295	0.84420686376266	0.826784832822349	0.841713175833006	0.842301554815062
0.846155744534801	0.833407564165504	0.838950716120452	0.850434384482916	0.842017806970867	0.831055095834743	0.823100959847146	0.847647151306259	0.841936159815749	0.830482361253712	0.831342815105591	0.830123473095941	0.836898209891812	0.857717451287864	0.842341568003123	0.826093205901348	0.862352209814665	0.830427810370151	0.821845217690794	0.835881450981569	0.843554333748098	0.832890544413777	0.834426735700835	0.839088685066853	0.851291023097712	0.823555751353962	0.843444941878269	0.844331271791628	0.847532679877892	0.837373994528568	0.828901989545921	0.841683128470795	0.850914678011929	0.849114483809873	0.833076365161273	0.847169369556196	0.826050372454741	0.835760289895764	0.838146538079937	0.846336783903935	0.840999917087056	0.832416684349877	0.84946599671785	0.848419128948302	0.826751307339997	0.828709841009075	0.836899343603981	0.829538766665045	0.84764777334797	0.84314078298236
0.847895467078556	0.837731997101826	0.832937688419486	0.860976539163127	0.843835869041546	0.829761682539932	0.842808154177053	0.846280843417903	0.838235669233636	0.832823903121461	0.854510071983278	0.832412164384518	0.836240843170879	0.845573285802807	0.848212823263368	0.847454549187307	0.840046458470973	0.838271026511986	0.850996474274389	0.849044590890768	0.845866104829296	0.834153007972389	0.836304524881306	0.838760290297908	0.842979508526316	0.852475308830142	0.841969305584512	0.841972336277242	0.841676941449337	0.850419515671068	0.824117747189871	0.826097944081323	0.854794079922663	0.839982949557976	0.841121195104321	0.838628952335534	0.837615682495582	0.854153693104356	0.836086375251497	0.839756556671197	0.843022427490819	0.84358282867083	0.829380919315958	0.833910262020988	0.843247053810263	0.842225280922761	0.843300590016787	0.848371375427727	0.82537531353748	0.825602971354841
0.849426353421329	0.834243465526541	0.839738716094945	0.848205672019779	0.830461944303985	0.845591070170083	0.839551602836495	0.831383082153215	0.848490541129401	0.851893560298334	0.849261093625057	0.825458597753591	0.829962641762151	0.8357715237572	0.840539013957122	0.842021906514011	0.853392608051974	0.836898359303652	0.838557616429731	0.843730871534798	0.858904251035845	0.844571060165034	0.818885330678686	0.822631163198621	0.842569487255915	0.863268286963192	0.834695836242577	0.852256408509813	0.836606900524911	0.832673269499006	0.844060337777581	0.839958650822717	0.83183879664999	0.834347747236386	0.835629237467204	0.847711060987499	0.84049253005596	0.843458396166408	0.85370254453055	0.851000977783471	0.840740838685856	0.83419442297119	0.842649456847341	0.81977597483172	0.837167776427816	0.843689889133963	0.834174669166581	0.8439659390234	0.841134754314768	0.833479589947355
0.847404481625324	0.839125066361343	0.835879660264912	0.821535748796836	0.846231166273605	0.850582669166231	0.84957292584011	0.829928514728805	0.834754283542001	0.847993016223675	0.845855330146476	0.8350510708222	0.839846014141251	0.824859342766529	0.838207444703743	0.833004352666479	0.85549835227658	0.826938060154981	0.838927912777089	0.844208322312971	0.84914340764758	0.849397452228464	0.827627873066575	0.832822542035118	0.850258693584999	0.836893552913921	0.831211144971243	0.844706960933401	0.834249895572187	0.831937002857836	0.843155452057177	0.838618461262308	0.831190108156382	0.837392217179451	0.833397230294476	0.833978998989359	0.848131065316717	0.854973808620965	0.841307822129318	0.848160414446537	0.831048698698564	0.825915011889382	0.841221035488138	0.815974185672687	0.832854333675651	0.851026804750803	0.837872429053581	0.857507469563109	0.83493508651681	0.854840287630399
0.842405785782065	0.833251077372282	0.847173166093166	0.835316221011484	0.838267381029719	0.848198254420523	0.837565829052417	0.837850960643831	0.829438034965369	0.839159105631028	0.841998557685895	0.844173840955578	0.829792051476021	0.841683540504785	0.844245273897798	0.859670184250905	0.840377308213279	0.838888221688383	0.835601609020528	0.837744616275575	0.84280475243404	0.84985136134908	0.834765997501887	0.843511745504	0.848290247463403	0.854011486754744	0.830968354146922	0.837461211199507	0.841213238979555	0.829775190268025	0.838945544823613	0.832961315471016	0.841340020639025	0.820403788446805	0.838732369043213	0.843622033510177	0.835346652477391	0.856580106347938	0.840303787101597	0.843801559584058	0.835406469609764	0.853260129703205	0.838588141642158	0.851201031326629	0.839286269726314	0.829767003500539	0.832639046916172	0.84528968273409	0.833507667386863	0.820404476364144
0.842727941309554	0.839990328547706	0.827059954388319	0.839421011958336	0.842716364697497	0.848764735739103	0.828116086460606	0.83825425124388	0.836706524115916	0.841376904845423	0.830116197868782	0.833819988406166	0.842101450990374	0.847829386751237	0.845477589464264	0.847059312399653	0.83524514853517	0.84556360657241	0.834353125813571	0.838362578922957	0.835996885463662	0.84673750028926	0.849063505922638	0.845820031118137	0.850571580390505	0.837703415954918	0.83599343872883	0.834686473392118	0.839443147671322	0.844641613169387	0.828670347214969	0.849186354903734	0.847430439976401	0.846275280407245	0.840936143400673	0.844728402169878	0.841227957620323	0.838765201386342	0.829556133842711	0.834214030069592	0.834587907591756	0.829938333769811	0.84674008479459	0.847906453542753	0.848026739698667	0.843708547835871	0.852709066872356	0.844440789724907	0.83027502295922	0.844576562114981
0.837794736846397	0.849159005389225	0.848684008142838	0.834768993321509	0.828217628548172	0.843075945210849	0.824421894995961	0.828532577070186	0.845008462602993	0.834112640799733	0.848010355582409	0.83428422771689	0.848210490031741	0.844817823360384	0.833564219877214	0.843008301641889	0.827614761600616	0.831887992992408	0.84397791944638	0.838096155285058	0.843210269363674	0.817236852097011	0.847536282688184	0.820620360261713	0.84461457174854	0.816807423174703	0.828924934514464	0.847443872801546	0.846539260110028	0.820438119834761	0.827413796210458	0.831684083560032	0.852747684752562	0.845473315403475	0.842221776287915	0.852994364790227	0.838757831455052	0.84022989372235	0.828693960131877	0.844089879005726	0.843178317511884	0.836416392977214	0.844881897474638	0.858653150079163	0.848460537102859	0.824643319529595	0.843716507380542	0.832262418778252	0.845453538237128	0.835536229573508
0.833453834662146	0.847070880914073	0.837387752425933	0.835329321135894	0.8467997661086	0.854958072973634	0.848785870773827	0.85059453530046	0.838211487792677	0.851377205309892	0.842259229895474	0.840891811344561	0.844153166973875	0.84869662930514	0.849127862350353	0.838545893798241	0.836305560194469	0.831708692223469	0.841733084914321	0.840355586944465	0.841532908219708	0.828288796954167	0.844236409315141	0.830767963039144	0.84649585497036	0.838366668263199	0.844626190655147	0.845501349902467	0.829202595504671	0.843463529289421	0.82614442027752	0.837780369136122	0.843372784456105	0.840921475378709	0.84010467012145	0.845337930664032	0.830810222830451	0.842904131792026	0.840765912722997	0.851236415053735	0.835427204474053	0.830954972672666	0.841497897333208	0.835393734444878	0.846098074534653	0.83794205817383	0.851978408875194	0.84311584449278	0.828024493146245	0.831734257792547
0.830299921398412	0.823965368185471	0.850095472926457	0.833263416907035	0.849810442556721	0.847402866302384	0.826607834925451	0.832070759904346	0.834368395802738	0.843126722048449	0.83972799149711	0.825933977836488	0.832498292075744	0.845619070313232	0.844941155886005	0.820975566809836	0.846237120048706	0.843867062314242	0.839501936579618	0.864162927113376	0.832218168583696	0.8355740822772	0.834882609164654	0.831399504641738	0.836389928302131	0.838793786262357	0.837969658504234	0.848074206624601	0.823390684699088	0.850487286778119	0.83280096808187	0.840062429458641	0.8422851555765	0.825253438313099	0.833573626514398	0.850356448453101	0.843319679694594	0.827135568695711	0.84705107228262	0.832229348922103	0.834322610350814	0.853547398103058	0.84744760934853	0.842042499552343	0.835292963910307	0.843013630423368	0.833341958469688	0.825748496059273	0.848824179751814	0.840264101914059
0.827111015069961	0.840579249866277	0.840274001450872	0.833795680534671	0.836322766590965	0.831737811811046	0.843429412329369	0.848269076671231	0.821052718390949	0.846498979916751	0.845653877224235	0.846635187165879	0.835485192596931	0.848347761592101	0.843937869210271	0.850484781190041	0.866077944381657	0.8477804501301	0.845511217112891	0.828672794643544	0.851635969927162	0.838109463378664	0.859902165255648	0.845102890362594	0.833824863601552	0.83889306481467	0.841706366981615	0.852871385189234	0.844129179969258	0.849205200560188	0.823609109046514	0.841279221358025	0.850289308212606	0.830417548139033	0.832450149916659	0.841250281140683	0.846286877505422	0.824340207312373	0.845518564506657	0.837012532540936	0.847379219716049	0.851164536760911	0.83594771596044	0.848918729354209	0.848828606875462	0.840950524143257	0.846513448875669	0.836885953203195	0.836523972872643	0.842262102157334
0.853422850905077	0.840025976424053	0.840804127177576	0.825512555869012	0.838770479982109	0.830842448703847	0.842193171199075	0.853225771749856	0.849536722413574	0.848538359609093	0.844373537257188	0.837835268150204	0.825454936197229	0.845612968934505	0.852038932143088	0.849930937595303	0.837369747795859	0.83378677436183	0.837362766698562	0.822346236804194	0.83498022879339	0.832464177855943	0.832468668162819	0.860423197724078	0.834632207238231	0.844283028209341	0.835167580436416	0.832980125056005	0.833970493727713	0.819508535765538	0.837254067593118	0.832806514897289	0.84614322078929	0.830138684272886	0.849547485632246	0.839780152169292	0.843489292508442	0.837181731314976	0.847434021386494	0.828278034849922	0.845036600803493	0.844787666326524	0.827638173572184	0.827037664324936	0.846468277987481	0.84761516219547	0.838589833816374	0.843999146246485	0.841465734036246	0.834232397534069
0.852547711435502	0.84637899749839	0.838227998711461	0.849215444500222	0.853163327281959	0.839567984756916	0.840260913846879	0.854485313918367	0.834626611953664	0.839187329059008	0.851257842326203	0.837824899819395	0.844368507220347	0.859305144502872	0.825310587100605	0.836253246889416	0.858674546323848	0.822276649722787	0.836589912451633	0.846379676517502	0.865806384524753	0.838455074644593	0.831233063147258	0.82413557693019	0.837422342863268	0.859737689472346	0.8230770274609	0.840437235459274	0.841418857445209	0.829745911924089	0.830643024490111	0.829520001060512	0.834535947006155	0.831766164121204	0.852143930635893	0.840723058081612	0.827458071774465	0.83902011919271	0.846402527601083	0.841523962335219	0.83529225233901	0.838574801774094	0.843845353570293	0.845888358454599	0.828718826953801	0.845437138422294	0.851284192322851	0.813942311308446	0.837355764374165	0.852551538338273
0.830425376487239	0.844087627078638	0.858841587981952	0.834225006738793	0.843295053725308	0.83137554111044	0.833233025679356	0.845379467822155	0.848486672555899	0.830410137070738	0.835136249051301	0.829031929645954	0.834378849996752	0.839430323566937	0.829075416258242	0.822534079482348	0.839051710658149	0.834871714574053	0.842346788261903	0.837946534237304	0.832446133870069	0.838255223511031	0.832688564282282	0.836599350027325	0.820237468868594	0.84922588172393	0.833495766448544	0.848003072429916	0.821831969893601	0.841234240271403	0.83340436132333	0.854669444660811	0.855295995727714	0.852233397536108	0.8388774885916	0.823318269313629	0.847126809851854	0.860806441190824	0.853894919771154	0.829755937150705	0.830865992856538	0.85728061140159	0.832609652941756	0.836496922864202	0.838074206344723	0.842322916756288	0.84007331276044	0.834119735032189	0.846197895797334	0.839714311706366
0.842506598244215	0.845421026765061	0.848082217184938	0.840127029990829	0.831098106650373	0.827787323964405	0.829518806860129	0.839284144501867	0.83033985841876	0.837620116606605	0.846079768620443	0.834428899983601	0.849334355117007	0.823001481739286	0.8458448501387	0.849682479294178	0.843458287359926	0.825251776955623	0.83319258022781	0.83557082344289	0.844367774270075	0.841131161231255	0.851712717355601	0.830213379987245	0.847020966262227	0.836826210782217	0.856946108156038	0.847470965916632	0.842971365622471	0.848267653750236	0.837088884137635	0.828098499448032	0.839416918231194	0.846743789581147	0.85679945356107	0.840787493565235	0.831941128163758	0.851887047539509	0.83612043130433	0.820651183741018	0.854604539823966	0.827382569285695	0.833087570873404	0.841936716713339	0.840936485270335	0.816474327609153	0.837216417846163	0.835166428829527	0.830474024031668	0.847424410833547
0.84631310928945	0.850391561970208	0.833278656018829	0.838975641180075	0.843371644150721	0.83541054379455	0.835576471382447	0.831926034799498	0.849251282502181	0.846916357727583	0.839155967399159	0.844712232558515	0.83336222151697	0.83056558856067	0.836562008740648	0.830881315993817	0.840645985439558	0.832331009493673	0.812855749033261	0.852268976247545	0.822853561997475	0.852403641334727	0.832698049321253	0.834732309783159	0.851761195016679	0.853212530323398	0.827770633818063	0.830660383259764	0.828906827253701	0.835232395815899	0.851017744478448	0.843305057341597	0.835165555432781	0.84953472679685	0.849289634598989	0.839499043304235	0.803966269709237	0.826773374856583	0.844795370672953	0.830214587123395	0.844669997745229	0.837205115928587	0.840592816688706	0.833251328871856	0.844244144074305	0.828218203736541	0.855538011700416	0.827751425214351	0.831020595534066	0.842156919348174
0.846498505683	0.844360227783998	0.826751984801746	0.83419157466039	0.842090515358851	0.856322443907103	0.833593532378109	0.839284302574498	0.83822267568903	0.833509796857001	0.82547725184645	0.826832426242798	0.83829806971059	0.845930528470732	0.841123273414736	0.828936701822574	0.839428319105066	0.833808655583975	0.835183289379105	0.839172986214687	0.833294399264703	0.845441301768686	0.834559833767876	0.842215128168888	0.854346651382208	0.836429670607789	0.828745672218633	0.842094895545297	0.832917197429346	0.843373231879323	0.839286828815395	0.85781287814195	0.838984275783529	0.847057233649038	0.81897039959736	0.839766288889227	0.839565205467891	0.843344903633075	0.840333594834157	0.836597972843255	0.852753966329001	0.833795701226597	0.830642993090628	0.837564373585734	0.841476085406242	0.849482842728671	0.845315442746642	0.82939496516763	0.83445745832085	0.842896480688287
0.855597015021727	0.845341084962239	0.818159586879037	0.851111921405629	0.859751306116155	0.841134207143088	0.848109186647882	0.838738280639265	0.845242569571692	0.843904225134219	0.840580743890004	0.829879093108277	0.819517326073685	0.83109011916475	0.862790615193011	0.8353308357638	0.841170445658851	0.838733019572619	0.835152432366512	0.836107666823428	0.838131357750018	0.832210813557663	0.825673864417584	0.839884906768542	0.838946214675312	0.836564496810725	0.839116559040518	0.838913230004074	0.834230841623822	0.835521215817337	0.843619001040808	0.838660089183657	0.849636081516898	0.838974093587078	0.825172078257471	0.830564314243327	0.840481202055486	0.847149576399289	0.837220863947109	0.838951179187559	0.833880427769072	0.835486442441242	0.846108433092017	0.842813806229529	0.817893471562771	0.83436340492882	0.83047656815394	0.822128491618055	0.839030454462404	0.831045356010453
0.849541123336334	0.84711259432052	0.830459979915687	0.833275727302162	0.838356311039133	0.837157240372353	0.816064989652382	0.837801977737506	0.857773032928316	0.849006521572892	0.848520205095331	0.841896052937036	0.849198423782277	0.854885454742856	0.855719953914513	0.838319915219845	0.849830920022377	0.829628393899667	0.843661179664277	0.844087906863783	0.829319914331074	0.83782854572763	0.827707172704524	0.832166419422907	0.834996404739559	0.823240747295515	0.830085291615401	0.840660048454267	0.828833379483072	0.845927369251136	0.829948448755594	0.842635102183651	0.820782909627459	0.847507475514908	0.830067775542148	0.833276443774622	0.839911530597316	0.84315399805238	0.839844554519677	0.827864092868541	0.844874727384935	0.83062822396249	0.842536565012113	0.849761439217164	0.83667352903262	0.828937530286352	0.848410871174323	0.85094257098056	0.840526705913386	0.830641848990541
0.842586674105878	0.841027984812249	0.825027678299175	0.832419172037398	0.850768552297712	0.82570099103887	0.832498602920742	0.826976826112539	0.832856608156059	0.831116313307351	0.848454753685174	0.835810935192856	0.844117699488079	0.840295187217958	0.856744883905508	0.830865696689549	0.844446013111131	0.843852992905385	0.836445873599143	0.845532434979063	0.831771420138943	0.843106514621214	0.831270715700995	0.847677107758746	0.833142425114925	0.820697104015944	0.832932142780793	0.835266605003972	0.835876335020849	0.824798147016457	0.838555427167599	0.836437371530583	0.838935347502199	0.82640311983933	0.822854771600361	0.832666042767188	0.833811922939935	0.835278006944169	0.838636613743258	0.832064175015739	0.830940678315767	0.835607729520825	0.850211104837046	0.833809251954306	0.826270816794601	0.840673102848233	0.837783471899225	0.824706375585736	0.848932031470326	0.826237327518639
0.843897682488642	0.834311742377451	0.827557700195264	0.831955535609686	0.8477938145415	0.841442461673363	0.829128819565578	0.838194300268001	0.842054619797652	0.821088540255704	0.840846909273197	0.83112334330293	0.839495356923398	0.852315945453391	0.856635154716266	0.826783877110993	0.841112990006803	0.832757220161383	0.852699662199059	0.833714967179818	0.849450396351167	0.831320602769475	0.844380327021092	0.840005939683213	0.845371976679233	0.832488226790693	0.848763071500968	0.844602791560253	0.837292139965853	0.829485739020002	0.820694798624538	0.841797545329168	0.836456234808618	0.848013059752648	0.831561621692827	0.853944308734569	0.835470490230427	0.822730570639927	0.860368378983396	0.835961212486488	0.860594478366686	0.841777034512828	0.819040697528559	0.841397857973448	0.830558608067315	0.851002288374996	0.826696813214019	0.834201787141589	0.827327750211981	0.8336985929446
0.834848227449298	0.844089480966691	0.851916806459325	0.835346093934627	0.846169885629341	0.839445107634817	0.832227983123745	0.840995012010013	0.838725249553127	0.842952107365937	0.832524190326829	0.841479291715354	0.850317064715148	0.83716117848781	0.836795252073117	0.847840797466054	0.840960791728196	0.842839158343329	0.841212786529626	0.823656355434795	0.842167366673278	0.848773445612743	0.844881430748877	0.839499978910461	0.832952412820457	0.831141405343044	0.841440360994506	0.847149504736715	0.832559846618158	0.848466053289016	0.829006478691125	0.84680372931953	0.843746272565076	0.844937201596786	0.853861579838105	0.82866444499559	0.829571663476448	0.837212282044131	0.828705930755069	0.827479741494073	0.835959488947326	0.836779230777727	0.835831135145087	0.833997505760139	0.823830612767635	0.833532681854632	0.847493307388409	0.832165078588718	0.836389278270084	0.831809365073492
0.840800186728447	0.837728763337585	0.84228632533239	0.825466190132985	0.845265286217889	0.844259337324562	0.84837908187495	0.843035013924234	0.845228399401903	0.850004433034005	0.833130270222057	0.841123166544712	0.854044282517732	0.840969924694574	0.853023238566973	0.835881118821496	0.847073643678883	0.825163786177525	0.856731553044048	0.843205388956436	0.829224629105524	0.847705074261902	0.850010769272733	0.846432645397513	0.832004003969074	0.849816545549152	0.839879138967811	0.850172613401393	0.842757913998298	0.827470292149756	0.828590861065877	0.829518446665694	0.82663930234046	0.843260261362726	0.848235637923161	0.831353371837002	0.836704477597676	0.842599463506792	0.85165595643841	0.835584119202315	0.856626028167844	0.83650866838425	0.831107088420684	0.827329497554239	0.836447284701878	0.828402368964749	0.836478219992601	0.833786642202243	0.837196906005571	0.841843305380372
0.851810184835123	0.835803513708395	0.829128130658327	0.849258207994562	0.848953932955269	0.832334986976358	0.841153659855537	0.829585030457431	0.833392666106029	0.855870434688965	0.846480002335715	0.832723705252605	0.823624833831461	0.842264109041253	0.842508592084217	0.854043832849707	0.853434790535131	0.841151843768305	0.824666332113896	0.849016892993436	0.844101230978297	0.84291573113228	0.827770219749244	0.81586468067787	0.847310150545302	0.839804537241344	0.838756348246671	0.83189694247484	0.828999554295269	0.834159350894898	0.817583980273018	0.838653831880719	0.830608798516372	0.833606351401631	0.850040986710698	0.841630029626155	0.823375729656122	0.819519694201344	0.845220409685917	0.83009062890625	0.851559964038047	0.826104703799544	0.848942243611754	0.841510363224821	0.831131072494075	0.831105722195667	0.839497414242372	0.844851262596109	0.844419129997316	0.833682458498849
0.838250539462191	0.831052759920567	0.843550665421526	0.849575149466909	0.84926262331611	0.829555906039521	0.835669519502714	0.827653544919747	0.830821279494648	0.842036588983896	0.829106162445329	0.852612551681487	0.841038027307428	0.839612915723239	0.83516151568435	0.846442176910514	0.836798648686005	0.837294941024947	0.847959772466181	0.833275914728809	0.841978496970641	0.826627773530926	0.842819958680082	0.832367176763168	0.843415316095477	0.823480985519076	0.834659119968	0.843993269262234	0.8297896479501	0.833095360501403	0.843176557117943	0.843938611938931	0.829266778400013	0.827407089841759	0.834558514297912	0.827413994621653	0.837173819469193	0.841322545443781	0.839913611687892	0.845131516627884	0.831556550949758	0.825672544147202	0.845264427904508	0.829291784018614	0.82785739437828	0.832194631066251	0.852619202463442	0.833075768509885	0.830270461975698	0.836816212011454
0.83976518658222	0.831699508338378	0.852498094383374	0.821760452137425	0.833216890036052	0.834629314196158	0.866591611072343	0.826437458140076	0.838608132536616	0.843190177829162	0.862321863348966	0.838705029841662	0.831269668799313	0.84218983070988	0.839082719737456	0.829635652740203	0.834358405764721	0.840131166844276	0.829974186972304	0.844382681795167	0.83834367861598	0.834600584682206	0.827599602031526	0.816912714247215	0.826946026035532	0.852645700870151	0.83243139480509	0.84019879896633	0.836531468672653	0.844515371559888	0.853805092460428	0.829238629563276	0.825817235374402	0.821355221256185	0.849128588145807	0.832246293910724	0.842647313849908	0.833201278651012	0.848398935114446	0.849842395214779	0.820829297172616	0.826598968507255	0.836773088107742	0.835110208711485	0.830676322092941	0.83923171018256	0.838417343581825	0.83795449977215	0.830637121672303	0.818279864809853
0.840433358742039	0.831977627658568	0.844383803098018	0.823949846625867	0.843219847524567	0.834409215700862	0.840912558910219	0.833824164444522	0.833524493648709	0.834346945813179	0.836014806914221	0.837973701686604	0.83390101705833	0.822679513073468	0.83332514940191	0.829479264737378	0.832220765997797	0.838069664750322	0.83654462039635	0.84658427336275	0.822270379616063	0.836683823151073	0.842867882317647	0.847085377229122	0.85287989224095	0.833020086250253	0.836677258756084	0.839176431045387	0.818727310494015	0.835147771408167	0.821986010632341	0.839064986300361	0.837002826227546	0.83993788910146	0.832592757838331	0.829681799609523	0.832856610402508	0.815826105275941	0.849876990113066	0.82736467134649	0.848815849414257	0.831176198875512	0.829004738607556	0.833357019417402	0.816326251398237	0.834899899242978	0.835398884458623	0.83059150123466	0.821417838920123	0.840737641212928
0.837125797664848	0.834996067579732	0.832293721480501	0.831796785042683	0.833627294211624	0.836899310028933	0.834938352538511	0.829927563217163	0.836561941198877	0.829499604182432	0.856730103699773	0.846849691711568	0.828217467700745	0.839396574577723	0.842483573173305	0.837781633084804	0.827836718358032	0.829548524890321	0.818218692894789	0.835564711045148	0.834404509705923	0.82791813115944	0.837827413577925	0.83514149968583	0.831007558360211	0.83416995971802	0.827539872729994	0.825129476193153	0.835412805228701	0.83178928439527	0.841240835930492	0.834169492209081	0.834016904969565	0.825631710889853	0.842213227073589	0.831275027069726	0.828159345898786	0.839025759602285	0.839167004413251	0.834077875064446	0.83060434886575	0.835058411824303	0.819840488710758	0.825888426135257	0.831506186565084	0.837916424786349	0.819692237126203	0.829914348768589	0.848706936680887	0.838785136453452
0.833641924185786	0.835350875137204	0.850885784507084	0.825900174167675	0.842698583204705	0.844755672389127	0.841515913313023	0.839360890389051	0.846024183504847	0.844550155812959	0.829075830612657	0.833886465575845	0.832425889968259	0.845934315792197	0.850136668261658	0.850961836070189	0.839117245733992	0.840862445670033	0.818413096212561	0.837711452950205	0.847426116386498	0.830231482048739	0.83262407219303	0.846979037486039	0.827756016634148	0.823005973262948	0.830293821803526	0.836625845823293	0.825579218606433	0.827853238791353	0.819245984809656	0.84269004491303	0.840540637147034	0.831139760659208	0.849283216780212	0.841444940956155	0.838921748001726	0.83411090932381	0.836292854962851	0.833541922646141	0.845232248443764	0.824858138612876	0.834750884697718	0.841540011869865	0.842784296967977	0.844469624295495	0.838857471078106	0.839185703893908	0.814637706874183	0.826121935215821
0.830961276351141	0.838278569210816	0.846811516480444	0.846047411019437	0.837577803600461	0.838051895268062	0.834418039221651	0.823422067481844	0.851241590068538	0.832177513610748	0.81980508634044	0.829977565277591	0.84562254308411	0.839158649552708	0.841219166888042	0.827861111401742	0.831717850294572	0.827519892895011	0.847728751049164	0.842188785585182	0.818302023693418	0.831950510125493	0.853074172466814	0.829810712532035	0.851735124357251	0.818075137186446	0.838143178185923	0.836224794535514	0.828626011575296	0.832649331780931	0.828679904872757	0.834801738686095	0.838102041312557	0.828233349691319	0.836893679519962	0.847908776214224	0.832050901438445	0.833560391112147	0.839177332753931	0.845415192395892	0.833558247538722	0.827851038148935	0.841374073641021	0.833877902262561	0.835678994714797	0.838512606297801	0.848173071979935	0.829340197836627	0.832602359232412	0.834678619153406
0.830796224520408	0.854180540585442	0.828131179137021	0.841942127536259	0.843786511516343	0.853899201473794	0.836456986504205	0.831199289846881	0.845454746847256	0.849133144282331	0.827604210420328	0.847415387055515	0.837957541680574	0.828118909326494	0.830355691492078	0.835912601743725	0.833338058373339	0.844496076684153	0.839025953091305	0.836154909337024	0.827541921467024	0.839214656384034	0.84959238232262	0.820009804049359	0.832820861771854	0.846997792863795	0.829254457992372	0.81861642575844	0.836440295505713	0.828638202464469	0.82666008447416	0.832469414742693	0.82040699760595	0.826390396141696	0.844046282399053	0.818751214615127	0.833458995419998	0.823508383467659	0.846124923352686	0.825791182592257	0.823792809337255	0.827951250755091	0.829881892041318	0.828818217541988	0.832128324946102	0.83545315821292	0.838257942113371	0.832021103848148	0.843331302072686	0.825209837666723
0.839852511370712	0.835084117146953	0.81381649063093	0.843885757950359	0.824686338429258	0.830742109640229	0.831198344579195	0.831847059030625	0.824261365004488	0.835021022525054	0.829607643665955	0.840643812073468	0.830774925601922	0.846682215674231	0.826888351139859	0.846106214405061	0.838017042180603	0.830445276866527	0.834359481615707	0.823930068173942	0.848070122758336	0.85036539836598	0.841328868284159	0.831173401097878	0.865851495694489	0.846300394580998	0.828187983212837	0.826248637086524	0.820354080250744	0.831150314938789	0.836559721368022	0.852402882823234	0.830649287165514	0.826813428448746	0.837083688646293	0.823161583134084	0.834200596774758	0.830311752621468	0.821968612688753	0.831558082613133	0.848372633916533	0.817031628198132	0.82940183634135	0.820008143641049	0.831158768279264	0.848630306231762	0.840569324141103	0.833438049010441	0.826233507735395	0.849737518534904
0.83906614862591	0.831615848430474	0.839205042946191	0.832753768737397	0.837610032196889	0.840523608453209	0.825912465709019	0.832247138445073	0.846046952804033	0.830283180097129	0.844225959026028	0.847527323699376	0.835939711708965	0.83958273442174	0.838067945667245	0.841268690744293	0.833338257233303	0.839251513709517	0.848038807470959	0.83797583527602	0.847323709499735	0.825093270597076	0.823952528412874	0.823862020040784	0.843020678912622	0.841864649168307	0.833516583776812	0.831826809807776	0.814969594673764	0.828156544660495	0.834049599670848	0.835420676502456	0.827484686376871	0.831986424674309	0.844327547224025	0.837167826999502	0.832036214557767	0.822327132455493	0.845238739671814	0.819996063901672	0.853999532368848	0.843592990772687	0.842969531536248	0.838458180399378	0.837471083315855	0.847839823823917	0.830948317176359	0.824072687415108	0.841020056121363	0.833636334841881
0.848124003692121	0.843170862626742	0.841633093337856	0.838900536786475	0.830954971123163	0.845023963757709	0.841036832798749	0.825445568110731	0.841988111502931	0.844855882529762	0.836275411640419	0.830594254629712	0.833346573626241	0.831240094957044	0.827459962905476	0.831453415406769	0.832561897759469	0.838223533808391	0.833810176917435	0.830456833202017	0.839466233131971	0.842648390499115	0.826736296689112	0.85163771904438	0.821831185207911	0.828472324059368	0.83581322836489	0.838387690987425	0.841391955010292	0.837453327818392	0.823399964726516	0.837336750151708	0.847832701573771	0.833749219507852	0.84321917244077	0.834770163652996	0.830963712438664	0.834294184408424	0.845580076413761	0.83253090827048	0.834664654490649	0.836421111239636	0.819795818592953	0.833318408854751	0.831464049955421	0.830822897525597	0.832315702958598	0.826929673909626	0.834175129538894	0.84275237092766
0.855273268649854	0.830677986082509	0.842573628116231	0.826342521699073	0.835013648024907	0.821968143614639	0.836481605967051	0.830359895636187	0.850801085566836	0.843933953850882	0.840645254782025	0.826104756716119	0.832212678372333	0.842806676829457	0.833268495958265	0.849080851237627	0.823006911889181	0.842814667585577	0.830897700411449	0.828739445412271	0.838027771147447	0.828572900076072	0.836521881351918	0.840813865946749	0.838014295311975	0.833708456795408	0.85029578965694	0.822187980928232	0.838352894657093	0.834235106773305	0.83470763616793	0.833546438350534	0.827881854761451	0.818118012667637	0.838984157497915	0.828422304852162	0.834017480676998	0.830080388029171	0.848377290471648	0.830341064620723	0.840736309585905	0.831187945393124	0.836721970482478	0.837509908487342	0.845883552729081	0.842391304244685	0.835090564207299	0.835637062879173	0.838205661495761	0.834328034837016
0.833833402522502	0.836367338700496	0.847267956187893	0.849201778862333	0.849164911528794	0.832061801677394	0.846932945546608	0.836912352943448	0.840029104709351	0.843540755248575	0.851183256991509	0.843171458217122	0.836062036243038	0.83996063076069	0.830966026962207	0.825274123674879	0.836018426697127	0.831300543691936	0.828394105855393	0.839666226688718	0.837055195504381	0.84349798207368	0.839072242363469	0.851593100265879	0.837813041556142	0.844531329215377	0.834804953081712	0.854638339170619	0.854776209431267	0.831846281184212	0.833291370656748	0.842243268350121	0.852272770138038	0.81984488036844	0.842485220058685	0.836397657061374	0.828918450115254	0.826198581321242	0.836294417161994	0.839395166684868	0.836632445375496	0.831086029837247	0.838121816660352	0.829072348925178	0.846316231751487	0.8255555334085	0.852458356656266	0.839484438305647	0.839258191911488	0.836847027333011
0.836865586480208	0.839107704553103	0.829420979153243	0.83228141030236	0.827344680767552	0.831189606607709	0.827956304518788	0.810161539207667	0.831019171315693	0.836009434614196	0.845412026461978	0.845921112580222	0.839148645702298	0.845641228340689	0.829217267869847	0.843880433984231	0.849410602468046	0.822316928056576	0.836534245347479	0.838758585995122	0.841540437872003	0.82689119368911	0.828737990033383	0.841259154601457	0.845220750565961	0.838691953975528	0.827063285649469	0.813320072217121	0.8361233250455	0.831402373998186	0.83026521608178	0.847261901897842	0.833072199424418	0.850173399522619	0.839064798648299	0.839499209563803	0.83515499454899	0.832610229178525	0.842318587895773	0.817925330966126	0.83188738589081	0.831624158214514	0.830377202579878	0.835610045186686	0.821141009863879	0.831706350682366	0.821604845525631	0.845303363275043	0.835148525515705	0.823652278862104
0.832025403113679	0.836611376523297	0.831614961995274	0.825471821039782	0.830899325058667	0.841476883168161	0.812638205999045	0.832012952381823	0.834681935451061	0.841244103015761	0.845055066770837	0.84089948904064	0.824180600079089	0.85139974037215	0.831180680355804	0.837376683162696	0.844682154183007	0.833637291299411	0.846418961757671	0.83516345816215	0.835185902440652	0.834662760479622	0.848962778135755	0.831693106000518	0.842571812144357	0.845555845397501	0.814859129275885	0.830430150656965	0.834187839531227	0.846988419555775	0.836053980133071	0.827094493012076	0.84277605049486	0.828304980042057	0.823392915802583	0.828684951986913	0.837045415448341	0.844235761119872	0.847246774040876	0.832603429838053	0.818465859825151	0.820289809746403	0.844944914909122	0.839225903998986	0.828386641946737	0.829182044186156	0.830937032997414	0.827273649819882	0.82457380532095	0.834680878036542
0.837210390280632	0.839848902803006	0.823706876980119	0.833860774461956	0.846514649307838	0.836318256521736	0.833179884134029	0.831822447023464	0.835319765917467	0.837558867457149	0.834331210273264	0.828468316271809	0.821809390019854	0.819238843013334	0.830742698876046	0.832887502418156	0.850753928838905	0.845734020646226	0.822896125710202	0.833307146461202	0.823733096218711	0.837693877810195	0.839816087071829	0.836703296211866	0.83331119884265	0.834564903816414	0.833046321768369	0.837249618693826	0.827578717298035	0.8287429743249	0.829004080632936	0.841854233320055	0.831310809229654	0.832402116314285	0.847807797756224	0.840661932647921	0.823015350915618	0.825627355758624	0.821456940048252	0.826625646347522	0.842799790867473	0.816851366777825	0.85369480593166	0.845755552493694	0.836405823616262	0.830266649857193	0.831639566822732	0.841855986309709	0.838690306964472	0.829274318181992
0.843394025624153	0.835960202462383	0.835117856618553	0.834279848262638	0.830230204211884	0.821525871881831	0.846598955480948	0.826125774842723	0.84393474304084	0.841395267791034	0.830339434887515	0.841757710179584	0.827589293186018	0.823104441100773	0.833437250765055	0.824508868538376	0.829063631892496	0.836277946488765	0.842546549691521	0.84623287680008	0.837343729876123	0.841253569414295	0.833109183479136	0.818065525330521	0.836008636103565	0.845763912113149	0.809459383377275	0.832270745526423	0.83249881407572	0.828191862644483	0.837184094326494	0.85314162643111	0.847292909132398	0.831754579016785	0.838909868152207	0.823825976020583	0.838890276899253	0.8188062608529	0.835255504479972	0.848503126984839	0.844905034089737	0.82241788982183	0.846267740615601	0.830098102138539	0.829652882867535	0.826331463334876	0.831950982937672	0.831477098425531	0.826675039005443	0.830557831419827
0.828252786999019	0.841119702467498	0.828717996102735	0.832651937469404	0.841109611316246	0.827141704568253	0.8356537311281	0.831936783474763	0.829884612917667	0.824769432646795	0.83737377668113	0.837806679384884	0.830693248282188	0.841039402610389	0.815409409818817	0.835128315632308	0.837546712428342	0.843257297832476	0.823302415828714	0.841323943731047	0.821281320745484	0.835117892499947	0.823552414738542	0.818241818082058	0.848286540972628	0.813732442530282	0.836408948825488	0.848379114647351	0.831851204736683	0.832007677132443	0.837083296904598	0.823719822381102	0.838377131513026	0.82538226740538	0.845480182172758	0.824221210459124	0.830775611139497	0.836141658762325	0.829978140579687	0.826495586753496	0.830967436665389	0.823619730186567	0.838868736719975	0.829893885465743	0.83083291351774	0.814250800371448	0.839387040682966	0.82069421189766	0.837937445293169	0.838960211374249
0.836513527246488	0.84736734670354	0.825287653483867	0.832855712516357	0.843101595178991	0.837148014526419	0.83147794716343	0.827916765090995	0.838554899727307	0.817360135035474	0.825159654020631	0.837152708478458	0.830773197284011	0.833283037309908	0.844730850236806	0.827922339494249	0.857479582717998	0.824619360464271	0.813197399121601	0.833522087510934	0.839860013685658	0.824743652985726	0.820882323671785	0.828859679004778	0.835833891968376	0.855992287766958	0.829992735574725	0.843590115317722	0.830700790533698	0.839346673773079	0.827599169463179	0.827281994533505	0.838477025004414	0.833722540089375	0.843397353823292	0.820741788678652	0.849733146514084	0.84238965139277	0.822707646389328	0.828471805772185	0.833382488730334	0.83709298572584	0.830248989585693	0.839109750789405	0.835896800815133	0.823613755328323	0.830165049027673	0.826288287422241	0.84515258228718	0.816145138030715
0.830032905159726	0.829387446861784	0.82354307880871	0.821833146916207	0.830981027911149	0.825607946159554	0.840906497652235	0.82857857246097	0.833479083137855	0.826124235181262	0.834885913200694	0.829707382760212	0.826647060394794	0.837506485881032	0.839196503184703	0.830124537884477	0.853811854879708	0.831852888317072	0.837279622287496	0.816441182692758	0.832062885455125	0.836560926181729	0.826335637222773	0.821502467005165	0.833239817762034	0.844727200674117	0.825826856484641	0.835585718112531	0.812715165581039	0.831333258925225	0.834429282430257	0.824284764144107	0.838593703060166	0.843910026335829	0.830189777263127	0.828564215051859	0.837399960530989	0.827069259567217	0.822842430745829	0.815661893589419	0.83388622701962	0.825218255860316	0.859017298417624	0.832288865662375	0.838696232049445	0.809826228303883	0.83431505665235	0.829381504110677	0.843688406580413	0.838037923533737
0.842007181983913	0.843114139843344	0.852660030161514	0.834837695507302	0.821679572542895	0.840019232436977	0.845678567442344	0.847070081304999	0.83324851704412	0.836043411583481	0.838022152452153	0.844349266208199	0.842831731028427	0.82405692647817	0.830371591870584	0.828580808087575	0.825073120082611	0.834355319612533	0.833157238987077	0.826465561754002	0.830869842382828	0.850400713001152	0.83032773300891	0.840406927528137	0.840641643539423	0.855446945124827	0.845885037553762	0.831937506028702	0.827120054448926	0.813923186780499	0.838307693231322	0.846822482297143	0.832112734997348	0.82474455716499	0.857922446836316	0.825710623443449	0.841834626910318	0.834081227571096	0.829705800320976	0.817444761517721	0.838268001639709	0.832840077278281	0.823926839771076	0.823942746329697	0.840708286063558	0.838501926259288	0.828694052770433	0.838887852102227	0.821230200381963	0.821496997563202
0.833273277486114	0.823399916016618	0.829677403672124	0.8065445660692	0.825918404123487	0.849162497766212	0.822899769424702	0.840178296420231	0.827403810679629	0.828236070660281	0.849599998279663	0.825346812251607	0.841199445833221	0.848593481840883	0.825961609433835	0.829512699378039	0.84155840200853	0.839744511150951	0.82615944083791	0.829103303646788	0.824355478045066	0.837856160136192	0.842730918842792	0.829278729417367	0.834778308256232	0.850417799257047	0.834669626320542	0.837727032776297	0.821450166353609	0.839652014552962	0.83548764667581	0.830718029552739	0.835351580118697	0.835375879634425	0.851258294864454	0.83114687814576	0.824124224908042	0.827878623344176	0.849951549011349	0.833992662199326	0.854562858939827	0.827809742707879	0.830590563028488	0.829794145536666	0.83177918055211	0.824714250140109	0.830477585297875	0.838726402478713	0.836879532903709	0.821137157018737
0.83096375903453	0.83503250550607	0.81871708737116	0.832155923944401	0.847620356888973	0.805880831427063	0.833065024885799	0.844831510842946	0.834754202812352	0.81536124691983	0.826286689322972	0.820425925902657	0.826828703557885	0.830962898102447	0.842518138745277	0.842164758680981	0.841820828484978	0.836780893402421	0.824582818822468	0.82678524343461	0.822724065810366	0.841144334217022	0.832309386514458	0.814748391958368	0.825293047578447	0.83828013966128	0.825350418714692	0.816875534051739	0.831755008261668	0.840539282449073	0.830222914393669	0.852598332092456	0.832671908069072	0.820423521598997	0.836637568299337	0.826563404488902	0.83301202076736	0.823092988936699	0.838233631831298	0.830413483244368	0.841572865239812	0.821864262423161	0.827890421853545	0.822371234604565	0.839770723677537	0.829120736796701	0.850464090749199	0.829623184352068	0.823909188997732	0.820654239758731
0.835131215902964	0.826377828303745	0.85160426050139	0.82690431881578	0.826664495448449	0.826970759020536	0.835103347716521	0.84063818870235	0.842025906250248	0.845933251347947	0.84036974696572	0.840080139764859	0.82948478968928	0.850753021778489	0.840540099560817	0.821037955632594	0.824518521724757	0.844901646372944	0.815003324270584	0.821750502724085	0.842673081190982	0.831605020856069	0.821444034674687	0.82303741323466	0.822034647176453	0.833043573268619	0.819854007684932	0.835854238178923	0.843382862101812	0.821792700632504	0.818351635948219	0.823744125489939	0.842650607502792	0.838223795807077	0.831497469503646	0.837464798060365	0.814536710921801	0.816597676489999	0.821363373270303	0.833290083164658	0.832191235461889	0.826540085666136	0.836946657392812	0.823850167360697	0.825809048937933	0.830217434792009	0.848889838537064	0.826158590045008	0.826776310798731	0.829340361368337
0.82989525180016	0.822876686702111	0.827806816604848	0.826886595427356	0.841550984147266	0.809930277600373	0.842794248240554	0.842641921895678	0.841815284746842	0.839660342435291	0.831214900054557	0.835687162093299	0.832501041017171	0.83305628488893	0.844755497642075	0.840699617039658	0.843244931554379	0.837457463959034	0.849915292358669	0.840186777779454	0.84374157233296	0.843946252183923	0.837616845373618	0.826997256006053	0.839209960619313	0.830270522299946	0.817575180408166	0.821121504441208	0.833624577295796	0.820690019543586	0.833310719031364	0.836842283505175	0.833874067243689	0.827187915536679	0.8300540003377	0.827232468805159	0.813112336745068	0.839304957890373	0.831675075632272	0.838846784563365	0.853934189815442	0.840259405386191	0.837611408580964	0.839529371548715	0.81493148493747	0.827345773611145	0.838273290306248	0.831060465365479	0.808210951322015	0.836006763717158
0.826839302085469	0.829229710630688	0.82761106587818	0.821573624485313	0.837500732810871	0.841775055995375	0.820149073607631	0.833628990755027	0.843415347976324	0.833442246855388	0.824337227850096	0.837844475811016	0.83113101457027	0.81719244154093	0.829302564424535	0.825556005948946	0.837729610685582	0.815718508402019	0.833445711383968	0.832800062314308	0.825094988099637	0.839605356978164	0.817370943951092	0.833687618690124	0.809729135376548	0.836877136745077	0.817502601214798	0.845498012348649	0.827364872369117	0.829838740284229	0.828285182769551	0.829262132513556	0.820870013139054	0.848493076015902	0.840146951876701	0.837702103389026	0.824532413179551	0.829324613341594	0.822319874925836	0.827667678368381	0.827813680510671	0.840103587246775	0.823472535945555	0.83955426421731	0.835691633824094	0.836049681205816	0.839372987475183	0.813660041432794	0.825846548127284	0.831047634524649
0.825948802320454	0.83074436272439	0.83393460627703	0.836677678195759	0.836360182646399	0.829027545782366	0.841804553983696	0.837612952901099	0.833725800953474	0.827705006052653	0.826712000352729	0.843153111635208	0.835306234846029	0.838974095575717	0.837204385536647	0.834437418738039	0.851390728580855	0.839965245498489	0.830971142090134	0.828503975209849	0.824094444752749	0.825679128326172	0.836089917849404	0.831164002010448	0.823808769008963	0.815734214349183	0.835842036240807	0.82645270943282	0.833844278147354	0.833064109703888	0.835070732186099	0.82806184031388	0.833172869257905	0.84298928405552	0.828933783009689	0.837739501728734	0.826024970157843	0.836836735748931	0.823679331723393	0.839379570212632	0.826275344865754	0.844305186613505	0.821347338765415	0.831705975211954	0.828031861096881	0.827964037793324	0.831219563639708	0.820319973644833	0.827908693137582	0.837785972293319
0.832773414606705	0.826281269499112	0.821275729828568	0.838304270495029	0.842480419517067	0.828588332748396	0.819262075115134	0.834944436460054	0.838599384044453	0.829019388542561	0.834899931463328	0.815733963620912	0.851039400405399	0.823122032156925	0.858542890904273	0.821815644923885	0.83597266745999	0.837546612939168	0.820264507871095	0.837855488598049	0.836450256914542	0.836126363785164	0.826332734028753	0.833629736004622	0.834955824948553	0.837746875263418	0.831802560271082	0.82610948658027	0.835192718670423	0.820401623310112	0.839418375738567	0.829308181415676	0.835735316132143	0.825799015769634	0.831875873282375	0.816088420874675	0.825616127057312	0.840200181054914	0.830508135058099	0.837615985032809	0.839559553625067	0.826506317425738	0.828179283570051	0.819467041928635	0.834544687708435	0.827618424661542	0.842002405744038	0.826930947424801	0.844213263034028	0.829735246460047
0.837116031703937	0.835862355345464	0.838423952056682	0.828880333725943	0.833233470049601	0.825801363836563	0.83286462651551	0.821766613180063	0.823576615825223	0.837620721702484	0.835111055906912	0.830769403329374	0.828157378617935	0.835678843985207	0.832837811641198	0.813268471539339	0.832521269405471	0.823651535240449	0.840764659620172	0.838871271211753	0.82864993402581	0.820287277385096	0.834462854714372	0.827788589681041	0.847549624244593	0.828915656313858	0.823996523944946	0.827174913207571	0.832957554646531	0.824059053544858	0.82331685916261	0.833656286954482	0.83019972485554	0.837943441652376	0.846630516637721	0.837461457873455	0.819993593252816	0.81030360923304	0.834926541007316	0.823940465193298	0.838701547016173	0.830445493481532	0.834502603550207	0.822992346392774	0.83960527555915	0.828850595071023	0.813113546167121	0.823235083352928	0.824637235178718	0.818569028424038
0.827203194974976	0.835124782067687	0.831066542518126	0.83587453367797	0.829159001064892	0.840800978994294	0.811082334453901	0.849105416655087	0.84980549518651	0.844998163259217	0.832559964989897	0.814057427148618	0.823349057218933	0.836485178744424	0.821059103584782	0.835230424523192	0.842080145877904	0.836565769163731	0.835851831391644	0.832012653884469	0.824790683953009	0.836644230742319	0.824640662232275	0.841839901548527	0.830140143022016	0.832486375284971	0.84331779942908	0.822403447697975	0.825310305054914	0.822534151940181	0.832146450133408	0.837332396973511	0.815085277477037	0.810665174444948	0.843782269091663	0.827945587959367	0.840903960498757	0.820747390757882	0.820063602694978	0.826111565110141	0.828075682940419	0.833081393696418	0.828811944397302	0.817540708198508	0.819972684144642	0.833692725552421	0.850958071592725	0.834390395273365	0.819020262902593	0.830707539481172
0.819493819766688	0.836095569689801	0.829719770045401	0.836567076917141	0.834254023877166	0.838529439177175	0.84449164504269	0.820013576063097	0.8461141532356	0.823810919714909	0.811490248586627	0.830511152496425	0.818051455479428	0.830851110750813	0.843528756708758	0.830167530554773	0.847423093594862	0.824042410887212	0.812027060919766	0.841614338118728	0.813691652034302	0.825957026098961	0.841253031329722	0.83463252387037	0.814652937016746	0.830373339992981	0.834499826437424	0.840857869174298	0.818912879471952	0.826378473264178	0.834644302233282	0.832042037997353	0.831251416781677	0.838058124263975	0.850552841060377	0.827895494438994	0.828276642640619	0.819191409067349	0.842131048761583	0.834680856893639	0.822849396161962	0.814562446379494	0.830837110344301	0.829278987017714	0.835757531553789	0.840681330626139	0.834075132048521	0.820729297175966	0.830883313962456	0.829409660167561
0.842932394090342	0.829404986052129	0.829338288309763	0.842387406340508	0.830469101214451	0.831568162290121	0.826992808768177	0.845017941865289	0.830101143414756	0.821006551279165	0.841834870365512	0.818769327903819	0.838166327689503	0.840651345365721	0.832134443602683	0.828638890103766	0.834737855634141	0.842095826872462	0.824021197391192	0.837190855061537	0.832859563259399	0.836341005572492	0.835624953486273	0.846354475916525	0.843403383405808	0.829996564686426	0.825626568282571	0.832103578505984	0.81899653499801	0.830153358299869	0.833800793064733	0.832959910228381	0.840569897317664	0.816566162031065	0.838363364742074	0.828127826984381	0.834071838868897	0.819628018594794	0.82792481731464	0.837831770741453	0.830614885361102	0.83979224971688	0.831786310622363	0.808660396248889	0.827777022017823	0.845972458995139	0.824182182552817	0.843343319948553	0.824850801526783	0.828113296204914
0.824260267061198	0.824605416900736	0.827051137555436	0.838182027016041	0.848110181345515	0.834022021434908	0.825412842855225	0.813352370015123	0.840411990544964	0.82012951260049	0.829007774373928	0.815205548990142	0.826975903960837	0.843945337868373	0.831607821341614	0.833405986226855	0.839242344801467	0.832055039233959	0.818526741623402	0.846534794888904	0.830393244212544	0.83551020888134	0.827590732749783	0.81556016847329	0.836691295940565	0.832053915123413	0.830507792444014	0.830125813685719	0.829190350849719	0.825657007617497	0.82346232798344	0.83027303062796	0.833598999273541	0.82913878461999	0.834139649869449	0.832214269632176	0.836721990433446	0.831946069363307	0.844873338059537	0.834031507827975	0.816077914506922	0.836832464687917	0.838439618189152	0.816433872585822	0.828402473449952	0.828085912882148	0.833920754136182	0.828899960093362	0.832194853153708	0.847990440870546
0.835096755384161	0.831685014236235	0.822700864050575	0.820693829980868	0.849003246129147	0.84193012893535	0.849494800382858	0.832895863265298	0.823782476896675	0.825986391541119	0.842835071854485	0.834180265488309	0.847384307741658	0.844399580267147	0.830241387150198	0.843858200375544	0.829219363672771	0.820266528933375	0.839741834852079	0.826592732023869	0.832246768369774	0.82718300172858	0.828607945416499	0.834451775547486	0.828738403236154	0.832278204195674	0.817785656607927	0.82066348938162	0.834781208520811	0.840922044261845	0.824706531005713	0.835104826399133	0.833952316209669	0.829635170726418	0.828153169185921	0.840661782508607	0.841621259489135	0.82877860152918	0.839886871243439	0.819165168868758	0.831793231207777	0.824982020537747	0.816903206721162	0.81597955195927	0.830121186468769	0.830279964220375	0.817865225027703	0.825285993566165	0.839685485564379	0.822510693605223
0.829442416272223	0.847927466596913	0.819095173646805	0.819410225716917	0.854205264301478	0.831162156779817	0.831733849837033	0.825898800853458	0.834421333533602	0.822338403106888	0.81982412664994	0.836135375309947	0.828718010457326	0.831971758372931	0.831667964471496	0.838183800127448	0.810954494699268	0.842521903174646	0.823138061496616	0.833348548097066	0.83126223346637	0.820906920544401	0.832958528326877	0.823918154537915	0.825781817146331	0.83656355241087	0.820452981046847	0.838006770020526	0.818982875520565	0.837466895048511	0.824410670504702	0.818720713645395	0.812033261688206	0.828127779063298	0.834412558069428	0.831093586585647	0.816011110133072	0.810039994912273	0.814535750609773	0.830067140435894	0.830755104576074	0.8149243635943	0.833865285344668	0.837012649660349	0.839891597558916	0.825698951689011	0.834185418961214	0.82675103578226	0.844109021235033	0.841153740928637
0.839460522333084	0.837798899759008	0.836058792028581	0.824979213847647	0.821347456866406	0.819805504639645	0.830988217087857	0.834171186113431	0.834992606135132	0.83149412013955	0.833654580662469	0.827664961769411	0.825147994971623	0.832214012607099	0.831848135785367	0.829967425622459	0.839896229964293	0.832263628484276	0.822255443185809	0.824939657291789	0.817547831861951	0.823269345108978	0.83270651757881	0.822786518245503	0.828338302809779	0.830470981915966	0.82221622196384	0.82449638565925	0.831037802420001	0.833148113439485	0.83484491302388	0.838588991113044	0.829718726367813	0.826688159506428	0.829733298253171	0.832801962729805	0.834064904482924	0.830205681958078	0.840856204569453	0.839715356831394	0.805926217687197	0.823393690787672	0.822286363985134	0.82399980380947	0.832607447178322	0.819140543589509	0.840600034591793	0.8175912212326	0.83565179780301	0.833214988567431
0.824986484740401	0.828397147505554	0.820077343593903	0.835644332831318	0.852053027488511	0.826827999531214	0.829601754394015	0.81533827068962	0.824373221733902	0.831561713123399	0.835482996932465	0.830850573387274	0.827956501084755	0.827024253414739	0.82502347990479	0.843263555732232	0.846008847206139	0.835671707662542	0.838004034154513	0.825084350278198	0.831356795480109	0.820363990075782	0.83155037683423	0.835364739773512	0.837898678195817	0.817308232713054	0.812781614842212	0.814379060257857	0.825727957848317	0.814511567629515	0.822088490912296	0.825701329765935	0.826273737065778	0.83211168293807	0.837000051853887	0.816488059983348	0.817703609557486	0.816078501847431	0.83980320239068	0.829941881484636	0.827665713105677	0.834482997976289	0.830989283749838	0.820200553069433	0.815876164915859	0.827126418550099	0.831960445506169	0.827788576062547	0.83631897891347	0.834670862626921
0.836320613819776	0.824013634519312	0.838472196938845	0.831344618610382	0.83587798239549	0.82857337251319	0.823174274653613	0.832163271227926	0.828046858632086	0.820739920605184	0.843840566832117	0.82643045383787	0.827072610783117	0.839497663097474	0.835434014321572	0.847256335232864	0.82418023567321	0.837685028035224	0.83435742269634	0.829675500060819	0.849731471636988	0.809516203714062	0.817879438007332	0.826939671639869	0.825270796732227	0.829685427706773	0.815230103828082	0.828390492406561	0.814936854302837	0.80820876917692	0.832387236021566	0.840363039502799	0.842868913146654	0.826625927323185	0.830976562652275	0.813167774395145	0.812760738106955	0.824504539533343	0.829395628580687	0.834977971558171	0.819802041826986	0.826193099990477	0.809816593669627	0.845014205003993	0.827739988159519	0.831223648031838	0.836110323196067	0.838077278463587	0.824205134447378	0.81654108272588
0.824930225605329	0.831954079150968	0.842551824663042	0.809875752354941	0.830041551592005	0.833456676430393	0.842799921082868	0.839801215443243	0.831645177490379	0.834205881421129	0.840344135412157	0.846064824068409	0.81975430675256	0.839224938289955	0.837179639407231	0.824966900240159	0.824248222228349	0.827130367287446	0.830020849295645	0.833066569065808	0.831732633514375	0.829516834732813	0.82666362406466	0.850661573357016	0.834404393441471	0.827196370200858	0.823264081534142	0.818482327452197	0.828623257137679	0.826335447740496	0.830218280070403	0.823340062042291	0.836747397574032	0.817897249307592	0.827464052836211	0.832171808195297	0.837276524160364	0.828267227844825	0.829820827881033	0.823199757201974	0.818235601698768	0.841095711218275	0.825847067420433	0.83390888211918	0.817638946847325	0.816298832229675	0.828218042424486	0.815991379677175	0.830173127880944	0.827065185070098
0.83124052109402	0.837502686506282	0.82914656243527	0.847049652073911	0.82917289074253	0.834795690690252	0.842620647551805	0.821254014065021	0.84302319781985	0.820649406106915	0.834142471465434	0.816263249804348	0.818068622418287	0.850138887714509	0.829792310055965	0.826092431176401	0.826677964229704	0.837996755294742	0.819007798195173	0.834882725409782	0.838027049341475	0.818563125866383	0.835092697104677	0.844048421082422	0.830659916269589	0.838355296733668	0.836997909124481	0.834870087247115	0.850522477103706	0.815284772855432	0.838331346693157	0.848184570341165	0.836426469953488	0.838498620992514	0.833158690905993	0.821915381780813	0.835776591376854	0.836218303382795	0.842586757339607	0.823746684817902	0.829238666541603	0.843609762363337	0.831857596989562	0.818754720901975	0.834395492937781	0.81427367325488	0.839486750182841	0.82737384180617	0.832426778844767	0.821232151168591
0.830873518095086	0.8328365636304	0.824255499491316	0.813473395131215	0.823398211720847	0.817564945128397	0.819404963109752	0.833058421407402	0.829853882701215	0.839633471857369	0.827931179528714	0.829124537160239	0.829185427687703	0.857750656442865	0.828389150987231	0.82711106773207	0.815220241739638	0.820970286716572	0.834605050678564	0.818147236194466	0.834367758603675	0.827981747106603	0.826972240420056	0.820627282642478	0.826342945976485	0.840646748066349	0.824832642541652	0.82411952894718	0.826701404690053	0.824796552514162	0.827026891876392	0.836859678362279	0.825261580509891	0.822896370396461	0.818037958239357	0.822940012297713	0.825792008282139	0.825441136762156	0.839512698436295	0.831095354514481	0.829665447278258	0.81741181419291	0.831701100978946	0.836447866000018	0.830406668001855	0.820529796775409	0.835927985145331	0.823033648785838	0.83765251207013	0.815825615852745
0.833507978005521	0.816397645777277	0.842074378003272	0.8419907981289	0.831965148841974	0.821829791372217	0.817077114186635	0.828017980079203	0.818627869520109	0.826846801191125	0.826090855783936	0.830351344194012	0.821992799279205	0.83772695912856	0.834811043747416	0.828769298658775	0.820805616460001	0.823723494001978	0.824847122104419	0.828719077008406	0.839085978890113	0.83287766220809	0.832947603899007	0.849408615656633	0.834249034431534	0.831507388144905	0.82445969130523	0.831063247811843	0.828363509729063	0.826805015853856	0.830042733081942	0.826411957141267	0.815570553477619	0.822759557412229	0.820415179197946	0.820968535005639	0.823713871768143	0.822092221735861	0.836741269111681	0.83056759173121	0.816159069611216	0.820862551821137	0.821564471831357	0.835885980570545	0.834419610134528	0.84910826360212	0.821196480185268	0.824432744553663	0.823113451086957	0.828652873644876
0.830049171621433	0.826677730316971	0.825620849471533	0.816883185534362	0.842024650370501	0.83700161107566	0.823221259170968	0.827425913428391	0.836527126023361	0.821635384070171	0.824819797307183	0.831508861087841	0.820016880703404	0.826061324397543	0.821280284276971	0.822151113794858	0.835916271772659	0.816201915367865	0.830610772659142	0.821541022037029	0.836303451691419	0.823687234688323	0.81893303806187	0.827224910804325	0.819769012522893	0.821568886911178	0.817822059102709	0.818904665978363	0.820463344635049	0.826578223195312	0.826352365976332	0.832749809077955	0.822557832223581	0.842418954533256	0.822396014996402	0.824982623629186	0.828092430358179	0.828435766925709	0.822110380523622	0.828470261358806	0.823713135988034	0.815239713066966	0.823663354299327	0.832278141281705	0.826903561490429	0.830709378627805	0.827547007023421	0.820810279642453	0.836406147970862	0.823630007382051
0.844581099363887	0.825066672118638	0.825530551182777	0.823288590815616	0.840268927315368	0.824573559165251	0.820863000551828	0.826685406368264	0.842422130523651	0.821555030627599	0.812222105967962	0.815566719991103	0.840105854525905	0.821357374257109	0.835748860678408	0.83116701373993	0.839777527160612	0.836248071907017	0.81625984921302	0.82954858988569	0.827377667069279	0.844160190565858	0.841671775729804	0.823872774375335	0.821374662287918	0.823088132081051	0.835069771407002	0.830104408057499	0.827745186047066	0.822224742837868	0.817333986938333	0.825040540618555	0.841389832964287	0.805017777750044	0.835708174151756	0.833060582243467	0.816677568185428	0.825126478988404	0.835986722721547	0.82072208414596	0.833717120047291	0.831466101700812	0.831263482087993	0.826777935529871	0.82644865859225	0.828642875746976	0.821412192873653	0.838126797244835	0.822368726988811	0.832782596074374
0.832998701127186	0.826254516280212	0.823270095761063	0.819954219992809	0.834098750351022	0.827265075050927	0.82326066404538	0.834307454907631	0.839523169997706	0.851098999825747	0.826200613209415	0.835204401956902	0.823083950573182	0.821817957880417	0.809975052573215	0.826524755568626	0.834039973833333	0.828157682505576	0.829543089270585	0.826326034021644	0.815724851506927	0.823661736144507	0.809464533342696	0.827613397404655	0.835267891789189	0.83015734313244	0.83059841798345	0.829356948082067	0.830463615920777	0.828929494566153	0.817979001587506	0.820185340043222	0.825123918820187	0.818583848621951	0.83745203233513	0.840091525922008	0.8243212976459	0.813254920618089	0.823616688380523	0.816895277128606	0.838657252528963	0.815662867698501	0.824150331580729	0.828481220808014	0.821917796351831	0.833900728567772	0.833312342932612	0.819036903995555	0.819814111779056	0.820572763306302
0.813919954030597	0.826910710694428	0.825130059646666	0.814249927551186	0.838502117662783	0.829758252570464	0.833923721248937	0.838079003127065	0.826225061789351	0.81450126971089	0.825132477647515	0.823879999277164	0.819261152831941	0.826484799452014	0.833953176920621	0.821192850313906	0.830782675564388	0.820488654686615	0.822227383452015	0.826476977917818	0.828212369676659	0.839946383220723	0.836597305136309	0.814053227728476	0.842805477284123	0.818418220583846	0.849552563734615	0.824263180165609	0.820753352142033	0.827397318894079	0.816689334802003	0.831679994172027	0.814389066584901	0.82331817435548	0.833180057800973	0.826828599947295	0.817602358105453	0.836670157752861	0.833733134378496	0.820284366129974	0.827807104581248	0.82958274761537	0.831356741585378	0.814924854295941	0.83630702735886	0.835751577270055	0.832046123440377	0.82622343657666	0.835009373535608	0.833674644131853
0.812729313899686	0.834769360874667	0.822788340532201	0.839706642938383	0.818408897623677	0.819715076914275	0.834229353457769	0.824959800356691	0.816638472026209	0.834922295496163	0.838614042797347	0.833998255140669	0.839601125071317	0.842411417064355	0.819511206498482	0.834854131905617	0.819505432207192	0.804708258288049	0.825892009254866	0.835922802448662	0.820280653719721	0.819514175010035	0.811213951134705	0.820342862646366	0.843058359765459	0.809038408050641	0.825420898934479	0.848953794382449	0.821521124324168	0.825693899429393	0.826706263355976	0.837198303505981	0.837410382294186	0.823936461702467	0.833488689939131	0.829523583364249	0.845511467274792	0.840985931986612	0.827137055014748	0.821380999676008	0.831238469327162	0.824891680796279	0.833496586256452	0.825275937902393	0.826564272362493	0.830549763485749	0.822921621375499	0.816165576978542	0.828470674264718	0.825453839887283
0.811742603690931	0.848489004997015	0.82641249888772	0.836240471844772	0.824062952718425	0.839783503578832	0.82355378848543	0.829087341288658	0.836506232371646	0.829076366977913	0.834232631275191	0.838556713533991	0.822346165471797	0.828496580856554	0.8249572685554	0.827305662945494	0.832931495706267	0.833318422025856	0.832289632333504	0.837182704363551	0.839011004933096	0.824255406011938	0.819851526887111	0.822620560438711	0.837773078628808	0.844911418844593	0.841781918684865	0.82722876929395	0.826296972805044	0.82997965051632	0.836849896525736	0.828847624022238	0.832352081642659	0.814158551334117	0.830721054556716	0.823260992275332	0.827767765763472	0.817065094716011	0.831655104433462	0.815314565536507	0.835148218947749	0.828369290077847	0.840380486716856	0.815798599869034	0.829292130995622	0.825881569825306	0.836425120823567	0.821707787111743	0.828644631443853	0.827309846404628
0.83370013269381	0.843715323809954	0.842640894786848	0.833065227466858	0.822702846290925	0.834425460864645	0.833720424074817	0.831441337859579	0.824740951320842	0.827585795231746	0.840329843965062	0.826597609632783	0.816367550339035	0.826015116930028	0.815438475355034	0.827109219577361	0.818098835239501	0.808725894956545	0.836781229837784	0.809091414901227	0.820004959764231	0.83029543790842	0.832158955265272	0.832355994779249	0.841151420062664	0.843671941862954	0.824288572933193	0.818110064107546	0.846991072286255	0.81258654231278	0.84027655359273	0.835688031366721	0.816782871708876	0.831137763031353	0.838352829859325	0.830518320707269	0.828549237438584	0.83746104076451	0.822022108240616	0.819177569897897	0.838094276016042	0.814177857448093	0.835948331030723	0.828710165107641	0.826768143481966	0.815296541018773	0.834674944731879	0.835116246352683	0.835329496357909	0.81797068894611
0.819777355989016	0.821190488718017	0.822450230427579	0.83161387693244	0.817335077239353	0.831803324139203	0.838268345952359	0.821443615179371	0.831340372681209	0.809252650265379	0.83647949544002	0.827110193088557	0.825600413658251	0.823560640469368	0.831044904655799	0.815634720092633	0.839215593966904	0.819190978679181	0.829437598700423	0.825776318463484	0.825978677614299	0.823741120517056	0.826285753266607	0.822009318184246	0.819771848773952	0.822020767244321	0.827251501191059	0.836559896429816	0.819982041688992	0.83621792958571	0.822272007331607	0.814948007722285	0.84134286580021	0.821903726520199	0.836979815558584	0.823145045174732	0.833926085158962	0.824955083942537	0.826321750508478	0.813911374628627	0.838334649980585	0.832034250463862	0.825912441855912	0.836944637729443	0.82799993814007	0.836666848712577	0.823780083584754	0.828681287913992	0.83236377141738	0.831416993614365
0.834254409994449	0.819535472472878	0.836356938808964	0.823190109234542	0.831350575230821	0.83289025936745	0.833210113218839	0.836130307057327	0.822843977273047	0.825641159863458	0.822153719522748	0.825400561634322	0.830004165710266	0.829350198841131	0.834892625415027	0.827535641201941	0.843101899856151	0.823788016123971	0.822488492487867	0.820521015768391	0.843597222917079	0.836564498435916	0.821023232735015	0.820081823422877	0.83731637800719	0.822344274617348	0.821245454770278	0.80741036435511	0.826289905309442	0.816069099260024	0.824410266925046	0.83878830283213	0.843749898215694	0.835374508658943	0.833906896872389	0.831119521601959	0.820083909697586	0.82520236902696	0.840493098193887	0.830282097765418	0.842236443771483	0.838194051993019	0.820589589615815	0.822923480611581	0.826155947890417	0.831296132198997	0.850366946760116	0.820601324884475	0.826367627211379	0.840503437582362
0.828647455335338	0.840855803434103	0.836493276529452	0.83147590690324	0.826132856073068	0.823009763584174	0.832703858209732	0.822656865961337	0.819696320621775	0.809296254071749	0.826146496313667	0.811661053080275	0.812904809009705	0.846656329618647	0.842612087496644	0.810815102723241	0.833831050002863	0.845370013009793	0.847992557117136	0.832998564309033	0.816396280624706	0.833642635441298	0.822989847571435	0.821354217717078	0.83520553886815	0.83273105158094	0.824636031934569	0.831395848166014	0.802272815333295	0.812897895828638	0.825090703511617	0.82602856757807	0.833875467837535	0.827336583375156	0.816564163711059	0.826309374144106	0.838447000393523	0.828589685706467	0.8341389163023	0.824459044764111	0.823042628977787	0.823950324297642	0.827667046000103	0.807536630358955	0.819637729198271	0.828490697489321	0.825323504953875	0.821202950901024	0.816698889964692	0.820410731708642
0.826797185752508	0.820747412899998	0.837941874766561	0.832579471512559	0.825025053157779	0.845190726049113	0.822861289087469	0.818842615841515	0.823188812776389	0.831152891747362	0.829230699283878	0.822152978362521	0.821842236702438	0.820067798438602	0.827542284806867	0.830992298693249	0.835040346518224	0.821884422386396	0.823929654281749	0.818393933644086	0.837346585812155	0.820516359742095	0.821829444524911	0.841360898253405	0.820046644499149	0.824390142592856	0.811096418381401	0.843591048170666	0.833210317424358	0.82993299434552	0.821695777839598	0.832068638468888	0.822306552907588	0.826440014232438	0.841273574198556	0.809742983140348	0.835280804385355	0.830019374720061	0.833282365677701	0.824894167422297	0.85014453924804	0.821121295109298	0.834337504138039	0.813403116777399	0.836611296926854	0.832032295719369	0.824641803647666	0.822170455712428	0.823896439847844	0.818395386054904
0.830055545214745	0.81962142801366	0.816623410603207	0.835081296932188	0.827384408139853	0.822659155407503	0.827012526170943	0.819965440720669	0.820074696948845	0.830416042067803	0.836489799894534	0.844100952343185	0.833030324073582	0.832670453052363	0.822361013305409	0.838194462414287	0.830044544692788	0.832290511321859	0.829609335528528	0.794897351585293	0.823526494083117	0.817188952297669	0.808511405044053	0.817389010003918	0.825549344235119	0.824427080838043	0.842206929221734	0.824257937358389	0.824048937705654	0.818366338394565	0.807744396038871	0.816534216995774	0.829914140774592	0.822822983162691	0.843558407632362	0.817378627448373	0.820289695737779	0.822817915876698	0.826072414759598	0.843658277850697	0.812459104264416	0.80977628022908	0.832173552540802	0.823758184925071	0.819181231409929	0.809819441921538	0.833742444133892	0.824783957918795	0.82092533309153	0.837411671370984
0.821646248595713	0.826305012713076	0.832808958613162	0.844589766633834	0.839783532473588	0.815900432897899	0.81485765732342	0.823736600109262	0.83346765593293	0.812061665324608	0.83040698779018	0.820378451655763	0.817901247936724	0.829227678845338	0.814999904282148	0.829084139873021	0.817379482760662	0.842497721185614	0.82540583133376	0.816731101367495	0.816891360465553	0.835022601092034	0.833796826613919	0.823410018083546	0.818364258986175	0.827154953810235	0.818374111501098	0.822675723449067	0.809741301730051	0.832554712956017	0.812650750328672	0.821213982488852	0.829574432731661	0.826595152577554	0.827511091458808	0.825642374588683	0.832261565933969	0.827451473828415	0.826628025155501	0.811095033838043	0.838907077107856	0.82727903035334	0.824569039947088	0.824698110720104	0.825611407482471	0.831714216070986	0.823060846762811	0.820004159780986	0.836769124146108	0.826850535823865
0.826786395260255	0.812130622123864	0.825731828281123	0.837997704920973	0.82997079745378	0.833642892594454	0.825886723361026	0.816130011469495	0.825098045409105	0.80915891972211	0.840885706867023	0.823398851004842	0.82298232958167	0.832977715327994	0.819075222759885	0.828371179457831	0.835029472518834	0.834715372931142	0.825778775537845	0.838108792170087	0.827522853974019	0.828174815025483	0.820609198116632	0.815161931257486	0.816055201495859	0.827770341096829	0.822896386172208	0.832078451392146	0.811366748291831	0.82102060076444	0.800046430463544	0.81715907053689	0.832342219461817	0.822815994183625	0.831400118830789	0.828120103779187	0.831176120465762	0.818889744209804	0.817407338144411	0.835794224983878	0.826879596194065	0.83556024243439	0.823608083146409	0.819956626695211	0.830378939621476	0.827533498294908	0.806167213663574	0.822498221963028	0.811073534284045	0.815353016041932
0.828656637457793	0.833457165126377	0.818545989326615	0.826464912492107	0.840086946060783	0.832348206342899	0.812082399579153	0.837277157942818	0.821242193222552	0.820978781335757	0.835362421774644	0.832617409469409	0.821222018253764	0.833351655112178	0.823499289068139	0.825781136248931	0.832294316148442	0.843578611864338	0.832570676593182	0.815114000052977	0.820300928812097	0.832009630546075	0.832327469712785	0.823034511917587	0.812991231366637	0.846743779527892	0.828588083985556	0.836965086025588	0.816019976171471	0.830514432633599	0.823094619941929	0.823757715620627	0.839903106404035	0.82651137136551	0.824145060389487	0.815109139520544	0.816700082272436	0.818040513166225	0.826409045363922	0.828753529144521	0.829688188150381	0.829728321286266	0.811812930146087	0.81494629466068	0.827217319232209	0.821555540110352	0.823363574778763	0.819077962491787	0.822709149107557	0.842901112649357
0.819374295224915	0.815024297367056	0.817680862403287	0.833631249212297	0.826099725964857	0.818965157368203	0.834827690739264	0.838310427504984	0.833371737210911	0.823610748708077	0.830739228874286	0.833485327872571	0.809740960761072	0.831975079966075	0.835760530383291	0.829053448347248	0.832408756262891	0.819036079027204	0.823140906744243	0.806337681781142	0.844010211828548	0.821504480743695	0.830184813281706	0.818896406359278	0.822719440487416	0.822659020542864	0.807735253680039	0.832139621590496	0.822512691232537	0.824117817000056	0.844078731919688	0.837583862553657	0.820777767005948	0.817028143383809	0.816906930627109	0.820780406007241	0.823603156708778	0.825603221773983	0.824739592586779	0.818919482018125	0.822359633987819	0.811701222701878	0.817976393102036	0.826031173756128	0.809946327591996	0.816603269257698	0.837442263389557	0.819710572557097	0.819997271503622	0.830082031104724
0.824008494998102	0.821813907150054	0.814753381261054	0.805035051196126	0.83684130319142	0.811480791355712	0.827665750071353	0.826318574729735	0.807573747333333	0.824824081360403	0.820043182766853	0.810459744400686	0.814775464314454	0.826991100393142	0.827839890811162	0.818593143537551	0.820687797511124	0.826269239713776	0.80459480752094	0.829614213615239	0.83306330608525	0.827732910783924	0.824999225872768	0.829943401563841	0.824942301580946	0.819847051404724	0.804313260673063	0.821083013067886	0.814278224921886	0.81097034901265	0.839005936893621	0.821266065498659	0.810980632312546	0.824197639433887	0.819615761559375	0.814987187754403	0.837073999773263	0.810569270848567	0.823280871352321	0.820868763104185	0.827089436156831	0.825641831215641	0.814776446497057	0.808904587993937	0.829364222946057	0.821010117748123	0.828800540324873	0.831073364163243	0.814930776225326	0.809990557960504
0.819388977321848	0.824052281290645	0.816312961409738	0.82972088627152	0.834603740823635	0.826899632299393	0.820707657014145	0.816773538847234	0.833937771918552	0.852811968861442	0.817644615557771	0.825903287648601	0.817831399546372	0.810649825304217	0.838764863124398	0.824767037056526	0.835715069186274	0.826915940299194	0.812568314136564	0.826734064772131	0.823839535479265	0.830923905168606	0.823582939314917	0.812579074441614	0.828818411244891	0.840622025762618	0.818432742333636	0.80888942299407	0.826003207174178	0.826953640022254	0.826175309850461	0.823410097844484	0.813649454997457	0.824522113146398	0.829346027640576	0.836091001452877	0.823323091108747	0.820100873773338	0.823615118620302	0.813885826504979	0.848735472523455	0.824288206930243	0.8169149609315	0.814929480685978	0.813939598361053	0.809884860027986	0.82453156898721	0.818915629025745	0.828061637296939	0.827931104824377
0.833729573394436	0.823741061170115	0.829452272355801	0.818739575103726	0.841366719084475	0.821417366747939	0.826054337640467	0.83202927528853	0.832870860710162	0.820883375631339	0.821049935208958	0.837755819244973	0.823820173871809	0.82611008473324	0.824387035664318	0.823527788267417	0.819010683621166	0.824230872951781	0.82178975672986	0.818179694601626	0.835174813260437	0.835537336239697	0.818319756157439	0.826597330495484	0.833208906563218	0.832419540723326	0.832935008002481	0.820693393816327	0.823917146964738	0.824297370871242	0.820778864353391	0.828792784140207	0.825644532303783	0.836703405749902	0.804280851538654	0.824533103168144	0.824352843510589	0.816639279252942	0.83248757363902	0.826044787937258	0.846450924893142	0.834359663560267	0.830340749082514	0.824253263774381	0.821052567063401	0.821427087231435	0.827924562446681	0.829949662749224	0.826931814153029	0.831358973040352
0.819678123714047	0.817328240722472	0.819705789490433	0.81256567702861	0.830163614899837	0.832517331126702	0.831547192408231	0.819550625391299	0.833674443121898	0.82255166173919	0.820343221150165	0.823607694665161	0.833996724351146	0.839630716059057	0.82876022483583	0.822418990534297	0.825707199289447	0.824167363466544	0.82555891565955	0.819949472990233	0.807179537491802	0.82662219708258	0.838598469957114	0.823312409885472	0.832056875185428	0.830253029186375	0.825739615456785	0.823476179991856	0.827675533509072	0.81901767167397	0.81251794111065	0.820820539279657	0.835490388536282	0.816471876061416	0.826655796965443	0.83265680426015	0.826608371167136	0.826676793157824	0.840191271062524	0.822548398833793	0.837796942823326	0.832287196299261	0.822278833090261	0.806037016942353	0.818715030757523	0.809858428381172	0.809453134788742	0.82185012389534	0.8216647946197	0.818687600492282
0.814249127669697	0.80006716793787	0.818635014738173	0.824441775501837	0.830801096091116	0.820505462698726	0.820605200357847	0.810923669089774	0.82482593951761	0.825997741944416	0.84181315004563	0.82219610403869	0.834887250012421	0.818439999512194	0.822017358656973	0.825621726373234	0.817363378707886	0.839176911289708	0.822909213827131	0.832241982761387	0.817267671228299	0.809236096129053	0.826200307678839	0.823407233092955	0.831424315335597	0.828006253408812	0.828776191698037	0.828094651660072	0.818986369076661	0.825229329744548	0.801090546213736	0.818570648555904	0.817856016687141	0.827692520952414	0.818424922974943	0.820015495000938	0.812311301086864	0.828696286460229	0.823233943464049	0.822929093396931	0.833096569561204	0.830131729250636	0.821691103517862	0.827528271729863	0.823109592970062	0.823882208188338	0.82778728622948	0.835640581630775	0.834747796808429	0.827288792951716
0.837374293407087	0.830871828687908	0.827298092823427	0.831717994162021	0.818988553248845	0.824811730653496	0.815256952125372	0.807813633785031	0.807226110830977	0.839449699887187	0.8249178190712	0.828085150981387	0.821748334328953	0.830491282040822	0.843967100504913	0.835252173767026	0.826639570990105	0.825137053148515	0.818749480149229	0.81842400034721	0.823899532837359	0.810064173636991	0.820571969251981	0.811600949143876	0.817735067301661	0.807868301225462	0.838262114450481	0.843684684040986	0.812478576519039	0.804359538085074	0.818828632574935	0.823169738648785	0.814139327350781	0.82224462903741	0.82543643836756	0.821716448372683	0.826947106240219	0.809148254787288	0.836938854767381	0.812670045517429	0.840568364282378	0.812368935893342	0.820522664897778	0.842934699141031	0.83434670517016	0.822934195544821	0.823075575707717	0.831499927123773	0.814717292872244	0.811312663459232
0.821826173627842	0.832364307628315	0.812936349875643	0.825441609497503	0.842576066652881	0.81768649788241	0.8222812628069	0.813899812006245	0.813823327946255	0.819818900548438	0.825197683728141	0.830672032777799	0.832904776488527	0.825705883857782	0.81760317917676	0.825831843796814	0.814604997614452	0.796387931219762	0.828781238359858	0.820380087411179	0.813806892698863	0.831487260083947	0.821762444346364	0.816057039373208	0.809068397573043	0.821365328722629	0.824579657685975	0.818596516305821	0.829610215933237	0.807660078223251	0.824656109668585	0.834552353690264	0.827726875443534	0.811860751328216	0.825218578949852	0.820544353847424	0.829360449363885	0.819233691474613	0.824169539448977	0.807027889682014	0.843398921652182	0.819692951978266	0.828229722491697	0.826763931826001	0.815492108872794	0.825790516931849	0.81430522690237	0.822696003712699	0.826643186873551	0.812120081091433
0.824554617763267	0.827250867773188	0.81166324287748	0.827536875742553	0.825326712644768	0.844622249519006	0.816429258621512	0.831433660949243	0.818050001423499	0.827346768079447	0.824921375465559	0.827052418268054	0.824427866509283	0.822229159538892	0.820941041901691	0.828546529992469	0.841177298116029	0.829424200534946	0.814441429601206	0.830295111141123	0.828247053613635	0.827832111289089	0.830567098951379	0.818943451580332	0.830058050430738	0.823894133517142	0.824057822526489	0.825033659671525	0.818828691126669	0.807717532399309	0.809832364377317	0.837111253398261	0.829502759053469	0.821705389080765	0.833408867232946	0.815594484682643	0.824287839012785	0.821101641180953	0.833150519266443	0.816672305278462	0.820782966618481	0.816449262191625	0.831140389942368	0.819507732484346	0.84070261448575	0.814092140341826	0.806342795450239	0.818621556121028	0.815442916703096	0.823484433750411
0.828510095922809	0.806764189639218	0.808264360810826	0.821025731728316	0.811960271592919	0.818391224039005	0.822203908534484	0.8122569008571	0.827423803227678	0.838270211144457	0.826743175175675	0.815043847702415	0.813276588834866	0.820761039292973	0.823613665774849	0.827446093399488	0.828235234824829	0.816474753842106	0.828469483761223	0.838540387030213	0.81194874712048	0.827878841807193	0.83128986159577	0.817461313917199	0.821594571978457	0.821682360673501	0.820473189756689	0.829171307402008	0.833533153028071	0.817482284741795	0.832276627986799	0.827715246242606	0.817479631561877	0.827035095393378	0.827224239925675	0.81404826995088	0.815300755652713	0.836654610909305	0.82436938518542	0.828627994531137	0.816205846988006	0.818650101776365	0.821115584160393	0.821523195101064	0.827403207683925	0.823234183505657	0.824933205107095	0.831061390417494	0.822270657526118	0.825561723695573
0.836679825607052	0.804858802773942	0.820072423347331	0.827288994679053	0.816677703297082	0.810928404366676	0.824898017538301	0.813534249452099	0.816246680288574	0.823520420123214	0.792159542912568	0.837434913112876	0.810926330754181	0.823571867146913	0.821662683011582	0.835541118018756	0.831037630413987	0.812569321293428	0.828483051445126	0.818826775856655	0.829160996559092	0.832523789419847	0.80962982183211	0.831827163527577	0.826641800722949	0.832639703364219	0.820863454095913	0.824100798401737	0.810304260303217	0.819318000913416	0.816774102189624	0.822119053183213	0.826470237143053	0.83298408107048	0.818664712413511	0.805342359496848	0.826633443094639	0.816143752706449	0.838376389224559	0.825963535324657	0.824886273182918	0.81033907026337	0.810034947877005	0.826907569727192	0.816562052027953	0.82193894273013	0.824962936627337	0.82257186131311	0.816418753241041	0.825276504322236
0.833394538080403	0.811204472027624	0.8200406750732	0.808166022013146	0.82578344628529	0.820979402420439	0.831484612848117	0.832621756801843	0.828380366444583	0.804121349487724	0.817761773151068	0.819583040422659	0.824307566936027	0.828881474780426	0.82569726779143	0.827832933266822	0.810477259554062	0.820122636143851	0.803052072206781	0.83024726711826	0.822769535567318	0.822357213777161	0.819863329984618	0.828488949766258	0.828506746268064	0.833768314030824	0.830638104522413	0.820055642715212	0.821888439716869	0.820435757834126	0.825563807165267	0.827201385316805	0.816821727369528	0.822440363290615	0.825669065659867	0.814909006385963	0.818106634591282	0.829920546410636	0.830786140495098	0.827789070776476	0.826416273017996	0.833253155268804	0.819694263200951	0.808960179509377	0.826239908232673	0.806694039769119	0.802175665742022	0.825022863529517	0.823183539758268	0.841360533873355
0.804714990291084	0.825649208092832	0.824894867005902	0.820865148207334	0.829252476388758	0.817873925162671	0.816746221958447	0.828157600128903	0.802888946626237	0.819584563095374	0.831961005375176	0.812925451635339	0.814438141795788	0.826963692995752	0.830527660638925	0.831083077995168	0.8188244156509	0.808595780720201	0.815570434284664	0.809639504853998	0.809257983758407	0.820760665018827	0.817614274621951	0.816281325608887	0.814555857794989	0.824200102735936	0.825944620599628	0.822089375678633	0.814796256925234	0.809466890079437	0.826994722255914	0.835318027023707	0.820288304974392	0.820940613674801	0.829217024198358	0.824128340525725	0.827201424056958	0.812283806129221	0.844201690982924	0.819280539046975	0.830156163430188	0.83231903218299	0.8170359630968	0.826451863304858	0.833677171320463	0.83196906138492	0.816776562642026	0.809090953188193	0.830515142772201	0.820074847916468
0.822084145258318	0.830537516923548	0.813614828503276	0.836616165901513	0.828406910151557	0.825419669952114	0.823550685702355	0.816227878664671	0.838696773874284	0.825364885850304	0.825002895514392	0.824400297776072	0.823365166789678	0.827352987389954	0.822870846131828	0.819683284645938	0.821763544176341	0.817062096633381	0.817982967881385	0.817468606191749	0.82228788573955	0.821313212588612	0.811433647661871	0.816837837438585	0.811577710726912	0.813795751092766	0.819949939002084	0.826957937260247	0.81383674368381	0.81498309051718	0.815457391705731	0.82054110002804	0.834117744868152	0.818382417831814	0.811634223914504	0.810324599219842	0.817214083890487	0.817592829794329	0.836427463360106	0.820664029192236	0.813910278181674	0.829313154458344	0.817868585875355	0.832896358887578	0.819812329351327	0.816532145430027	0.829857050091005	0.815617539737364	0.823045281668452	0.830236722939267
0.817515113470263	0.826365582811623	0.828054579149499	0.813167168040519	0.828259511015139	0.838075618195977	0.819819621928172	0.823777231661003	0.807979892728479	0.821066436170351	0.808540714144618	0.824843607651128	0.818608478933206	0.835953940172832	0.820050390402574	0.832125129095184	0.803789864785801	0.838502216325769	0.825045633306413	0.818066869479788	0.810996564501562	0.823971892810443	0.810725683170465	0.832976183342351	0.822046109861949	0.818945557411355	0.809199595720664	0.836282393317162	0.809370691491539	0.806686199944077	0.829383529841904	0.82646652484665	0.822055482776666	0.811098812957264	0.826374317799033	0.820594543012724	0.818166532817757	0.82620895933216	0.819740852463121	0.822622979400007	0.828838521618432	0.824355072549018	0.809496058419902	0.817379130982741	0.826094110773717	0.83106133436191	0.827157724657139	0.825566463418241	0.819117864962684	0.825606383012545
0.824766926962821	0.819599450479937	0.809547814849811	0.807747961186768	0.816499670425196	0.828921098873222	0.808806373628914	0.825271718561183	0.826929971917144	0.812934986508886	0.830977594457525	0.833834602964063	0.832150747183276	0.832454749131841	0.835294929000723	0.841164346835231	0.819495997298518	0.81723101378711	0.837261283027545	0.805913310685001	0.819149194520055	0.811476231043774	0.833163220227202	0.833733437975837	0.824556439331422	0.816806937179644	0.815317512599284	0.82392716605429	0.816534157959384	0.815463602117189	0.833810211520807	0.824557739557294	0.815049481706483	0.801880108626609	0.817733577489515	0.821867714284093	0.844148556060299	0.816197986393028	0.811868705869136	0.812123977090829	0.826193156737102	0.821467976056913	0.830195263908977	0.825139604862129	0.827322298965279	0.821203743712339	0.821449824132439	0.837474443727422	0.805981876917176	0.813748945143823
0.828187441781851	0.814004898571334	0.823627536969206	0.825254428009848	0.808428364634538	0.81875891904083	0.814205806529276	0.833056986637577	0.821171808774039	0.821817750680199	0.817224778456983	0.834613639444682	0.816400975084715	0.820487274366518	0.815821661096661	0.83590952133303	0.829474742484892	0.81540916241538	0.829566549617028	0.807089435391497	0.813945007732676	0.827060130891181	0.813296654178602	0.824286911274523	0.824637636084648	0.819662020557196	0.811723006193192	0.810938648502186	0.809440729776846	0.824556754919937	0.824483757479135	0.828901525265384	0.824616855226745	0.815173433091511	0.817555074500533	0.805076611231498	0.812542002606271	0.823944313310822	0.821970111880402	0.817645856096029	0.798092051102467	0.818854240391816	0.820243645163062	0.824212945330761	0.830454549362562	0.833348625045064	0.825196517716238	0.834534279948536	0.813405589843261	0.828504452245037
0.828901441884495	0.81532429425813	0.827952364189845	0.813032413040823	0.820029222313213	0.831819795890068	0.82205756581157	0.828910955081345	0.82101948038097	0.810544413862143	0.814507963704498	0.831409046382	0.836652363942829	0.815376851366977	0.821090472742595	0.811180801428285	0.817263960832042	0.833318782355734	0.822628014565693	0.810608030478582	0.823622937315754	0.822424563374826	0.818709924565637	0.837683876584581	0.82624205404952	0.826659879917051	0.805303574165552	0.826142166758012	0.827015090578441	0.817410281902516	0.831546840904354	0.820525843439404	0.814670862800852	0.81288152811896	0.807921258599419	0.825324498007806	0.819410271822671	0.833605384909378	0.820346699106481	0.816236420362965	0.826927076624733	0.819983581485952	0.824096531794812	0.823924229637471	0.82470677403599	0.821677805335532	0.828627979974168	0.812701411384055	0.83419679783423	0.817730105614876
0.822861574881048	0.814318649708922	0.818092942153525	0.826465345334576	0.825235298296195	0.816102604157221	0.811033273467448	0.818673511344697	0.829057399539997	0.82233504266593	0.820239141999831	0.82045097679991	0.801461721717142	0.831363682707742	0.81073237978087	0.819382036220567	0.837917507618412	0.819095976970059	0.80768648882827	0.817795018449949	0.836541562346854	0.832810979090598	0.813069837604141	0.825540662098742	0.815920650469084	0.819468853797949	0.823858194528477	0.827090091775187	0.812920677521701	0.819322828783486	0.808022370282721	0.827693196818074	0.828185428280321	0.820466772183591	0.812983408794694	0.813111650139659	0.827773473142798	0.827491810868251	0.818241115350155	0.805111190513712	0.815210924317033	0.82385755282783	0.823712542023078	0.818115705636371	0.814689945334106	0.829136102029693	0.823572332996556	0.824200297018299	0.833048177982428	0.810163779899806
0.832878402428186	0.814229626148036	0.819824277639327	0.828983887391015	0.811562879679895	0.811460164703046	0.824237751913819	0.820914045551621	0.811392360692949	0.809886085157526	0.829487920156152	0.837482206299864	0.824761274671679	0.816411869542721	0.81743591959438	0.831371515457914	0.836314523550663	0.822592012874738	0.819181718592488	0.827709348124839	0.814150488074931	0.828255626249867	0.826816480307868	0.818006884816561	0.833040588725757	0.822798578806744	0.822237938033231	0.818234757194758	0.824900383095205	0.823735121710946	0.823162200973075	0.814520343702787	0.82224887725591	0.809557864991442	0.82909536128975	0.822491313147065	0.83116487895248	0.827836777352101	0.828116590471853	0.82983774551571	0.830653510155151	0.817640856078599	0.824834104164827	0.822877347106936	0.799991425264901	0.832857451036017	0.821161245969754	0.821769721485206	0.819992416486477	0.820877577997228
0.82870640945056	0.826841640388382	0.819345243726078	0.825819681489714	0.805855562266072	0.821101164887583	0.825752505225443	0.819099675424	0.82758023857988	0.818503441752322	0.818998876945462	0.820829698198297	0.831045168105607	0.805385609168776	0.82247476500216	0.822133996528139	0.799232565863866	0.815404074526949	0.820974150081226	0.818604306934656	0.837505526649261	0.825688050573769	0.817544798719097	0.824114307054378	0.815356893457148	0.835726503714524	0.823100476951777	0.819437157205866	0.822673486589664	0.834439435833189	0.819643382309425	0.829472765673007	0.807332426027258	0.819204172153953	0.823088309784243	0.820286602174211	0.81836541208093	0.798708382070361	0.809219055247566	0.821349415851889	0.825830528949979	0.826928305741165	0.828224908465	0.825640206379875	0.818935351116384	0.809108909485764	0.812422328069858	0.818640310083829	0.827147477568779	0.812266989640929
0.826481367289936	0.836993321759558	0.823003586648749	0.800011433501869	0.819671538304063	0.831152853816588	0.817258526301177	0.818020829063485	0.826994056670423	0.810009905671251	0.807639378814457	0.83173549095962	0.825711928289243	0.816176595365721	0.820976876446053	0.828860244871928	0.827864395110777	0.81873891442467	0.815939165802542	0.808302066965257	0.823520319131979	0.81968770896672	0.823296557084269	0.818539998459884	0.819133936460417	0.820010549066662	0.820970171195729	0.82724508268366	0.820661975119152	0.822528254655252	0.814494228264082	0.826186867063711	0.809133968132336	0.828944064956984	0.823295315131338	0.818919417325078	0.81910477915153	0.810282301784862	0.830215812451941	0.810539324792274	0.82633919388593	0.82696518930397	0.818901581318024	0.815875116390842	0.823034010629265	0.813227732925984	0.816279112239043	0.808871655443008	0.821149561069209	0.81449351941279
0.809435409652427	0.816168236752688	0.818316789997397	0.823909113394575	0.832839969322517	0.823970977628129	0.830520505790072	0.826077723498847	0.811555412505512	0.811936795457826	0.815447106134144	0.835517453344422	0.816745402556663	0.82157442990817	0.821856654258689	0.820928302071834	0.829584028215632	0.81840427522748	0.815530055491154	0.83259703295135	0.831886444504934	0.818660736978224	0.811471819327402	0.812684113379917	0.81435096558837	0.825135067732439	0.832057756949649	0.817293061145001	0.817808292700837	0.820507913271765	0.810009554885295	0.822652278712595	0.808819726295879	0.826129911977798	0.812615935100881	0.830070374185053	0.839989963501305	0.831418688177533	0.811689574763819	0.812344668503925	0.813824354957137	0.814902532174026	0.835081183297565	0.817770529406381	0.80640754490834	0.837557220242037	0.818027153848249	0.806736922421316	0.808112327297939	0.818886823510193
0.822666537593993	0.800990074640067	0.830950619412375	0.826239306183759	0.829870546659505	0.829057326048059	0.825639864307101	0.815659942932222	0.824665849659329	0.821061354977042	0.805729884574662	0.820448164821502	0.8146616833292	0.828484494038018	0.806834651516667	0.809612392085046	0.808480583279922	0.82092090874714	0.826044209466905	0.825761512118495	0.814975914708224	0.81458133088053	0.81734244454552	0.833539000214899	0.836925265776633	0.82243927639537	0.820979617057113	0.81342321605258	0.829071674059285	0.818228736510767	0.824712263733378	0.828901869832695	0.818179013745973	0.816953003207107	0.830027228746367	0.830047720494264	0.820802578608278	0.820035746427278	0.819088474904891	0.812006981444544	0.801327833477128	0.82356915259428	0.80940749212278	0.815732922873361	0.819545773656887	0.828170271163203	0.819161616984052	0.819002039787369	0.814228597455843	0.822879082072035
0.827608728669746	0.817938996631367	0.816601174372098	0.829422695368602	0.820708488549927	0.824286168283978	0.809574128066693	0.810093344414149	0.814271886286636	0.791004387289371	0.826098018189036	0.828761561632194	0.82980216243265	0.823215896847197	0.813615889935335	0.813343753433508	0.833118547228794	0.824702642563996	0.819088645450847	0.810662197086782	0.823093989410739	0.823559714393172	0.830909367726358	0.81583630773209	0.818423788901776	0.812772492208071	0.834900339313413	0.818683401069663	0.826621965213271	0.825842305990763	0.817994295919272	0.818521009167632	0.81567579215342	0.817237967888544	0.816047587011796	0.833102810526135	0.817437613235371	0.810936619545373	0.82736394835937	0.822902244409183	0.804523323590839	0.812799127334164	0.833769283272413	0.826879122452414	0.827904324378346	0.832315324516841	0.813011129838865	0.821368855814685	0.817668996870053	0.815975292091913
0.81825750540191	0.813982393127972	0.807580130392782	0.823570867308898	0.809070060551277	0.830933863162806	0.808800452658028	0.815659906138965	0.815832852476058	0.82811854963125	0.808110650272143	0.821509567006642	0.823249719789744	0.829546041981067	0.810266460070877	0.81619108088255	0.828898762504339	0.834522363245988	0.813807492722341	0.824204108268216	0.823022257055215	0.813003451740815	0.807881927400082	0.812124120517081	0.820188807012659	0.83355843905345	0.819640210542067	0.837545868188545	0.828401036402084	0.814796216107114	0.814191425767027	0.803274883514701	0.820270468981847	0.818174710074192	0.829863430401344	0.817316543129306	0.813073956863888	0.81575460654737	0.813309411436757	0.825738103059132	0.815918474752011	0.818276237852614	0.818316944033544	0.801356145226889	0.812397969197202	0.825691849570996	0.823114072130792	0.820274681635201	0.824639803966273	0.819921160403224
0.837241675334759	0.83299922738494	0.811208340865007	0.816743691610267	0.819771269668589	0.835282597749874	0.824320105551694	0.830968246918585	0.804905882352586	0.822284456029032	0.834338042703558	0.812421816307758	0.829113782405431	0.827646369291273	0.815860200032988	0.824348152128337	0.818843202634671	0.810248444033821	0.826895616884169	0.81350033397909	0.818018314965285	0.828970936162827	0.817549060400341	0.812990369435602	0.832871586087874	0.828410481310937	0.820099768962703	0.839035717496663	0.818775445612739	0.809144089180788	0.827835055560577	0.82032778724029	0.831099155265503	0.815777178779332	0.826983389052879	0.814485055786784	0.814068954659205	0.822108734765659	0.827797242042444	0.819620501970767	0.806930774614022	0.828115639412316	0.840891224724912	0.823259741756886	0.810044493944193	0.810568160444984	0.820345612253631	0.820926877003251	0.807096242494616	0.806141340474
0.810895260643414	0.819360961571599	0.811757137627032	0.828908010789417	0.814485998112436	0.816976014036996	0.821862826873757	0.816772433632523	0.810786485161424	0.817007619429128	0.813032077050636	0.822384486557211	0.83366717327213	0.812984574984207	0.822482465118544	0.825717836022014	0.833359854368607	0.815788314260804	0.846248100440132	0.829285380995935	0.841447140495954	0.829453138389641	0.800349460691393	0.814861565004718	0.822281780884881	0.830558669868947	0.817731578675094	0.819654019213255	0.827561842454426	0.821728899960094	0.812100481912608	0.797777689673892	0.818420566041878	0.810523217797853	0.823727144801864	0.821368730659079	0.819178669144411	0.814860454644364	0.815829486840135	0.81931142516356	0.811417560653877	0.812859263549541	0.812288175015346	0.80849061346048	0.801327699224929	0.82133572544996	0.814403157854776	0.81526375061544	0.809974157995322	0.820550747367628
0.823732616892747	0.825246112358185	0.808715371404674	0.800301064055719	0.806503602214485	0.815123289996298	0.824371403649966	0.815239387414751	0.833449674081611	0.832980587026701	0.836157364741589	0.822826505778654	0.804708897041488	0.812479528834141	0.835403071658405	0.824381181206326	0.814297198916944	0.821832417638911	0.834897012280751	0.827990849117575	0.823137057433104	0.823834680076217	0.810687608989235	0.80680027333193	0.817294792257669	0.817667446575989	0.830148260852886	0.841033435618229	0.824309841214688	0.816415245844295	0.809423308361165	0.824667724238503	0.816967089459095	0.809509624471632	0.809975848148018	0.825464653531607	0.805376605675235	0.82558131784104	0.819800493042881	0.816250853229957	0.811074266237149	0.818509459940248	0.833286151645274	0.807637990988055	0.823667031337468	0.824251648607291	0.805436457236935	0.812910072141559	0.80861478711067	0.831224778676871
0.805314345634928	0.815767988143141	0.811464666798307	0.832381488380904	0.823105100530513	0.82100282379177	0.847337868333482	0.820055447679535	0.814188773309541	0.82448529656776	0.824145001415613	0.821953159704471	0.819648442320823	0.823247254457363	0.824205602468053	0.819130514862902	0.824897309938766	0.820187177473168	0.844684172669589	0.814148854483694	0.815154075509758	0.808259572670454	0.809659763350713	0.818358267665556	0.829371553383701	0.826058664774348	0.810382029380218	0.817610825979771	0.82300429784361	0.819796904549008	0.828241900852554	0.823786718970088	0.822684046955304	0.827268019258136	0.82717328443467	0.824039354834683	0.82261342058474	0.816162096963979	0.833232368426238	0.812536643770024	0.81977446384917	0.827140576710496	0.81087799005932	0.801627297119081	0.818043805848084	0.803716841465338	0.8352003370651	0.826613231570011	0.793275024268207	0.81119239193654
0.814734015183901	0.818660330711382	0.808734232461319	0.824719607229501	0.819483451859259	0.832674251049299	0.813693481165856	0.811449147833615	0.819346877740413	0.811444302762676	0.842487790625222	0.830197198557278	0.827816781504244	0.824842847455965	0.815434739564976	0.81240447535084	0.839167366280748	0.814896220421911	0.823085096470024	0.815828439035805	0.820318380273609	0.821507234375148	0.801578831853069	0.801775575517888	0.834220907078974	0.828528636901374	0.813297516360173	0.825389815196241	0.830734510734894	0.805001641011849	0.81530718909167	0.827903352035805	0.830816790430035	0.819744149900111	0.82256314801426	0.827416210913143	0.829234982155248	0.807254718573157	0.816145421873716	0.800499936276581	0.812428526514636	0.80883024539061	0.816327444248186	0.795823984268896	0.831792472286494	0.824014555547427	0.810972718341096	0.809979510311345	0.822818362292947	0.815552345721842
0.819819265538945	0.806436429621764	0.820312574253167	0.820067662302702	0.819478140018971	0.810736595093815	0.803672247049032	0.838775231945227	0.814912358438509	0.830191508674434	0.841406066507459	0.827471726247813	0.810424749904183	0.819120378355309	0.815192729391425	0.824626456607467	0.829209597331971	0.826680212453321	0.807171806482231	0.810235574338318	0.816440921414431	0.809964067521795	0.819604910048779	0.813020792305482	0.817390919781395	0.830166944062494	0.833387789325636	0.807942690334795	0.816084280502933	0.820206915562591	0.808932828445343	0.816863026112767	0.818124696253617	0.802396471952325	0.829787216156234	0.810372031159234	0.832201408708	0.81710360284461	0.817647209287572	0.808803443066374	0.824485738431954	0.8201588066932	0.815977444025399	0.819938747492249	0.8151428742938	0.814303279149583	0.814598353495833	0.820848055705055	0.813972060231125	0.804611716624628
0.825942264916154	0.81111444234706	0.823219701645957	0.815824104541306	0.823157889619641	0.824626341299974	0.813312030046445	0.819153678353913	0.827228022599428	0.828858012275724	0.821909539170506	0.817564969110091	0.815749339544503	0.813713560834699	0.825061532914731	0.81196715926026	0.83198440933585	0.833505526719534	0.819334952203265	0.817302465614971	0.826013490712696	0.834693561282284	0.82177380151853	0.83020568901742	0.824475423566404	0.830894702841394	0.811744628063373	0.81294565426637	0.811760827356239	0.801109958772309	0.822379203710309	0.816135234455913	0.81821845155705	0.815362755008911	0.821933326179579	0.810386757453363	0.821214814444566	0.798815461534892	0.820746618828	0.808959053804944	0.809912413450192	0.798723550792742	0.826985759680063	0.813368913801567	0.821043758973502	0.811932477221344	0.807519687386873	0.810984665990636	0.82244182328969	0.808854825674539
0.833621504509572	0.808424419075347	0.822070253250242	0.809934116141122	0.814812114077179	0.818304428800958	0.818031484559256	0.826263496861296	0.82447740467331	0.818148092838521	0.812504601385372	0.822942064749931	0.798119383300873	0.829307789074111	0.833727619873147	0.828944762430834	0.838467978541059	0.810347975331057	0.822224903506185	0.804164635847047	0.819937300614939	0.822007819749501	0.818149015228574	0.823385386948256	0.820264784524549	0.816248372669604	0.822011201588324	0.81548509051417	0.813658819453477	0.812104600522214	0.812595962411046	0.827130856797963	0.817334745113734	0.805829688187471	0.829923789081074	0.81396337993603	0.827140146601658	0.823273078776199	0.818021593168305	0.814248786469987	0.82432528497744	0.815328747054015	0.834625402411518	0.80409614213333	0.809369315958241	0.804653722869253	0.841672143805214	0.809332304578429	0.814715339020182	0.806826696463939
0.827367336638941	0.818015359090776	0.805492429693772	0.81443136134966	0.821388153461941	0.811090291775098	0.83409548064133	0.812107137231022	0.821195917483593	0.823227371881419	0.833397001643127	0.823240729806041	0.812997897334572	0.831961840157319	0.834706549554981	0.809733614261372	0.824318591222534	0.825069009638653	0.812909016091851	0.829768814197755	0.81964625723568	0.819483571218329	0.813723200331969	0.813263030956634	0.823015730634067	0.803705527506091	0.820280849029924	0.815545214115689	0.820870999288755	0.81066811116984	0.821482842042675	0.819694169258939	0.819110061665677	0.829445605132567	0.826019222594029	0.817504891952438	0.815429877246959	0.813631683876763	0.812087507835625	0.827495290232274	0.824789463292338	0.819825046799725	0.813164097703516	0.819512197142355	0.783371248841786	0.80084461236113	0.826929073758324	0.811614665813946	0.809255859039488	0.824513511727772
0.824232388709845	0.820804489776332	0.81383164256602	0.813872128955248	0.812528491120826	0.827121114568805	0.827656415004066	0.811747903599591	0.811612307595408	0.827879772298084	0.808570770738539	0.814836609550424	0.826107548571233	0.803330548545186	0.833415628395325	0.827337024068882	0.812024345927649	0.81311813357986	0.813304181463096	0.804892859763284	0.84962808303562	0.827267812769147	0.825312753026057	0.80375231045052	0.798082912495461	0.815154166197097	0.818620267447902	0.815839364204544	0.818421841375702	0.827868585879719	0.822046079992227	0.810285505972928	0.808183211682946	0.819741151139752	0.819916943496163	0.810644025137954	0.822130137181481	0.81408006405535	0.807936418512423	0.822679123238137	0.826054927080315	0.821090624690864	0.827517728331716	0.810779500937314	0.80937997255419	0.80857204775214	0.819845915388453	0.81433621093291	0.819926867618047	0.821322300547523
0.8200766145105	0.82466508912342	0.817315237074218	0.814826774438377	0.818991903466392	0.817720422169741	0.8127916675777	0.823768586817895	0.823187233885062	0.795866143306614	0.823942423941725	0.815314415482293	0.814120995799542	0.826753193892213	0.808111383495893	0.824109816628036	0.818634011831374	0.812634905620013	0.816246003831563	0.812440512975461	0.81925392906084	0.811610277949808	0.813034924705999	0.819615396941743	0.815167220989198	0.815355781038293	0.822369340654426	0.813918337292499	0.796802313107789	0.79863122554069	0.812977674536	0.823184673119445	0.811753441677199	0.820037562664525	0.811580210587348	0.811462448758912	0.812705880799292	0.808120585840283	0.815010757860695	0.809331051835375	0.827142082768371	0.819695187858061	0.801008201595435	0.815931432156438	0.814965410893734	0.80958024865614	0.815428087629689	0.821896724251499	0.830709397509245	0.818633074320547
0.821213247840729	0.803127743294425	0.822976028717329	0.832225409667481	0.82950863591452	0.813955174364882	0.815923508517643	0.822704752204635	0.816898616671584	0.813358806174618	0.810646915047993	0.806050046370942	0.820748287209882	0.824339177159847	0.826093740245991	0.826204608087628	0.798971860712743	0.819102939618913	0.817363350764376	0.827833286832342	0.830204354189532	0.829153750129919	0.801522365853278	0.820728507651384	0.801147650124843	0.800219676425508	0.826333450552895	0.82401515996058	0.835925501180321	0.824717322118817	0.812446241960666	0.811266737232842	0.824542060502898	0.827420712840406	0.819504807992096	0.799664685034169	0.817360950768446	0.812224982774685	0.79222181206474	0.803486256743151	0.83238235730476	0.820073919915721	0.820507080108666	0.807497007014695	0.812313329354514	0.814948552087149	0.812667223970087	0.823858292968956	0.812948130732904	0.817939162224376
0.820003752291936	0.825982070947589	0.812958216745355	0.819176262177132	0.807091098119089	0.811616658304474	0.823784320309854	0.813908518408974	0.802216300259159	0.816645847515637	0.805716243517915	0.806159775057245	0.827749881783806	0.819726938579412	0.798108905540269	0.828156326517138	0.821179950589848	0.812217854894401	0.822504960534174	0.811934011336564	0.814612970480177	0.818933833899656	0.813341002559888	0.826988328025473	0.79221280174041	0.818801535278839	0.82104467483598	0.821467468907378	0.811164116007559	0.81587066976721	0.812616331937063	0.806943202961757	0.814749655064552	0.813226449994297	0.820032720370285	0.825130192350186	0.815176503352349	0.814377111895323	0.814378816948751	0.820226183368688	0.809364633645925	0.814202397303418	0.805831832819591	0.813565383331476	0.811391639538904	0.802458330186383	0.818013152784624	0.79967178115539	0.807985130862999	0.81806230574818
0.812224070060088	0.822768567278049	0.819270852272259	0.831577866511114	0.80951304440925	0.802748919375597	0.818474105628348	0.820824789116844	0.812671402962756	0.82141186919333	0.810765586646908	0.818437414380863	0.820837484082348	0.809646753953154	0.82375304448347	0.827570359244323	0.826726227876287	0.815530455039495	0.820151301600227	0.817932099031554	0.801567352482833	0.821940407735101	0.826024455536382	0.812090602556072	0.807562062865026	0.829841155164206	0.811273787489883	0.812236300463257	0.820237558428136	0.800951684335623	0.808761621246004	0.811630288963617	0.814351878638865	0.815927199028091	0.821951516410571	0.817532273610657	0.822188506182835	0.824398321273282	0.830443816284563	0.80574203643093	0.824462521378427	0.818258512025028	0.822972099406696	0.829620140494602	0.824918903694099	0.819993238863054	0.814705731635802	0.821601142261889	0.805898568634241	0.819334605214307
0.817601820662789	0.807473815945326	0.808636168304984	0.80658821008908	0.797929952254398	0.823177619020439	0.816157112428664	0.813344948076326	0.817367757279522	0.814694749580007	0.823442620450915	0.806677208961223	0.819324637857382	0.828001896296327	0.81570035285334	0.820642244411777	0.830539986410547	0.827584749680246	0.82807727113188	0.818533332763177	0.819618373302282	0.821205005649331	0.812181766212034	0.82657068356279	0.82428086074069	0.797378985659359	0.816869927978097	0.803653265470826	0.811823789771029	0.820967252264392	0.812545600741257	0.818079133546842	0.81196645310537	0.805220561926915	0.826878339259395	0.81655209800172	0.817979181324413	0.790800200896795	0.820844490512377	0.806849472791316	0.812967586121138	0.813168269749923	0.80434415933181	0.813777852647365	0.805658776072035	0.819591428206149	0.816421464841532	0.807229561953465	0.808572248020629	0.828367737549199
0.821673949441144	0.812585578196867	0.811564368865839	0.814039203681881	0.812316931891197	0.812928294167634	0.826849669042957	0.809875959131069	0.806615691942904	0.811614518881749	0.825066567712548	0.819788987836217	0.817685839165476	0.801573218703679	0.821571576987086	0.800599695226029	0.826538914658592	0.813375887831624	0.826200181363588	0.802491288661845	0.820099634605902	0.802106921907564	0.83062472226324	0.808195168644682	0.81771182282627	0.814517560476866	0.81564022448185	0.818336849220177	0.816743610305066	0.817673330814569	0.810870704197198	0.822620079304943	0.81350200348018	0.832896099708007	0.833879944640454	0.818474623726673	0.825388220465709	0.81639325523876	0.807886209455168	0.807918156397592	0.822965683563451	0.817453540200123	0.819505275909055	0.810089785638039	0.808628407154208	0.832268960475663	0.833831515941987	0.809495361727721	0.814493290289553	0.823109335159003
0.820953310054206	0.818593299526627	0.821115673755045	0.818790374486498	0.813681624217168	0.822650799360458	0.810021570477427	0.816437712991631	0.82650425725213	0.81015339250864	0.81560291317311	0.82809725675433	0.811655789293651	0.820737529350953	0.805437741956179	0.824627502254763	0.814565480440859	0.817843727297713	0.817504680941987	0.822328204249569	0.814081121069479	0.808109354790149	0.814376328683344	0.825649069886104	0.820091318017601	0.82261270786244	0.818497126289022	0.810838304133871	0.804743044626522	0.803175403583942	0.810636529614836	0.818073349384509	0.812962579828069	0.799321244550413	0.81856426450664	0.826443172282693	0.809760357931595	0.812183720619369	0.804118097237919	0.819639928304949	0.805244002130011	0.801007017523476	0.798945230973856	0.823583757187989	0.803624853628352	0.820715387668092	0.807054032154447	0.800971187600937	0.811222498408557	0.803511899697659
0.80722597487314	0.817866539170359	0.813049147781589	0.811459676377588	0.781349195649383	0.811625211213037	0.835401619253272	0.81850696184878	0.811422636841778	0.80413966110353	0.829325377384773	0.825127821543943	0.802950614848521	0.817350314200749	0.807100417484741	0.828269331103096	0.817990000174939	0.812215015465854	0.823905890018777	0.80290389676868	0.820398477184201	0.826433005004321	0.8201901270945	0.824546153371448	0.814591162023875	0.817793698391801	0.826896388639839	0.809065715598069	0.824727582376054	0.819851383289605	0.817117416793135	0.805925163786024	0.822027474904699	0.818489823503323	0.8230559630821	0.806008228455614	0.801284266117055	0.82829354877351	0.826325777311103	0.826398277079949	0.814465025701616	0.817112049945	0.828526187969563	0.799232063924193	0.823974018827232	0.811442098897218	0.820182655437531	0.811126669546064	0.805481055917446	0.814858345215052
0.826855075031827	0.803357815399969	0.801093654522616	0.814703856483317	0.816218177815649	0.821883977427825	0.831291054344984	0.811504507533125	0.818722143506166	0.810606764033074	0.81319595738392	0.826300851733892	0.807271159778526	0.823965134761259	0.816575045862757	0.829602549187241	0.814761842598906	0.817023221340628	0.803332004500452	0.82163587768928	0.813051074138173	0.828346270810626	0.820572203591231	0.823098385310358	0.825474864116788	0.81412221308762	0.813310092671128	0.826889901244885	0.810811874944586	0.810601637445973	0.814786550912469	0.808470998613369	0.81040582772297	0.813629602850221	0.826182378191371	0.806342675067503	0.817245190152185	0.827743653167985	0.829359719467469	0.80001525632712	0.804347074808245	0.813230959698092	0.808449465025075	0.813902834408782	0.799651239641406	0.808824780438786	0.807771180538341	0.805870868749974	0.82084874576391	0.828435070887232
0.819208012636306	0.807969262229794	0.817504407087158	0.816465539077661	0.799242987456554	0.80622547811882	0.804353779219308	0.818006309788892	0.820533528094905	0.802223295530676	0.820414102844634	0.81308302616404	0.807337791662713	0.81104043665358	0.815048530740007	0.804044278228124	0.821048124742063	0.824627761221895	0.820470222057587	0.817572008238546	0.818077987755967	0.814930299521794	0.820401178458829	0.82156059998243	0.813235519227202	0.816222207502358	0.805509486993287	0.816645695905692	0.82321756007135	0.819463790832984	0.805452167050362	0.815807584801459	0.810178538252288	0.8125496268634	0.818017055451169	0.812069573455836	0.833401894225068	0.828463214908063	0.829940834779751	0.79919922529079	0.816329481063609	0.814367048446188	0.818997119629125	0.802069164390641	0.81638285497917	0.800112314383739	0.81537279567633	0.828787258721509	0.809063820425843	0.810059450221915
0.83672459114159	0.813210033505925	0.821044790002847	0.81471917816261	0.787559304046022	0.823659464251301	0.818675605599136	0.817717688120714	0.800066460623099	0.811573489945978	0.816080721346658	0.824207256930829	0.82303137206205	0.807406020934285	0.824825940959345	0.814871694236197	0.818873944078166	0.823366019906866	0.807112170003346	0.822037191746238	0.824881003904054	0.820580523039925	0.81826693113323	0.820085154530014	0.803321745704546	0.805315350606984	0.812227850646045	0.818857592251206	0.827581377704688	0.801381532374031	0.810102642014103	0.794974140605494	0.819662531242842	0.800658140368006	0.806104180251114	0.815002209999827	0.807078404884896	0.830449375918295	0.828456251945273	0.825403874349498	0.805754231768342	0.805610254158008	0.806064290580199	0.818595014155027	0.811132760923803	0.814942110139757	0.809078330105788	0.800961414872686	0.806496285004384	0.81787296819592
0.811856268937194	0.820383524062089	0.818270214705763	0.814195569362529	0.806972082936103	0.807254275738275	0.829001699883234	0.818742163224037	0.808278064698813	0.827759154919644	0.818421378825728	0.813412723486743	0.80556117562415	0.826746903102952	0.813856975729781	0.813565338981077	0.824097744269464	0.808112458843725	0.809309034033434	0.802859824870082	0.822674770365961	0.810268462009822	0.822333184445343	0.811577086589582	0.824351689666496	0.818619466567208	0.818790781537342	0.825567050178761	0.814029608870521	0.82086526700548	0.816886360519967	0.820843051809394	0.810705065437068	0.812058871983312	0.823028258905336	0.808709731176566	0.82212338593765	0.816814762712338	0.816676262424664	0.821563814588117	0.81051795100482	0.79549144637715	0.821384558224804	0.80999970217959	0.816951368225755	0.806424142623523	0.811371260818528	0.808595766591695	0.828017747846137	0.817646927429731
0.803737551650413	0.805739986461554	0.826357341802998	0.824695396262126	0.822994994022535	0.809860558102898	0.801817367039952	0.826016792862363	0.809160657131905	0.797970345351884	0.816554301884412	0.808033930782028	0.811703677244889	0.833140955434864	0.803583461649862	0.83387669225356	0.802386669360627	0.820035944222175	0.806675594530757	0.823532627662326	0.829300793514351	0.816827116211789	0.818922290842863	0.829256512246289	0.82294958580876	0.815605933877765	0.824144780606197	0.811291795054216	0.817492690988567	0.809226815623676	0.817715431273793	0.83493417712763	0.815396460830717	0.812161607245763	0.820288104794361	0.814295150669916	0.8058690456245	0.822867662226294	0.833391495698828	0.811884336848992	0.808354836754062	0.825792555988295	0.806813350607942	0.818018984736039	0.802365934274056	0.813261035056511	0.803693588946853	0.824447609548899	0.821304946190284	0.806797604205352
0.803962110223489	0.824650100760077	0.823978061988678	0.825541931111264	0.799798334454964	0.81528143726958	0.806858908141211	0.812845713675243	0.805593580754417	0.801039054494196	0.789625495219158	0.828104266016599	0.808405477272223	0.818492974067209	0.825605420005082	0.81338658035299	0.824518507578907	0.792728026584314	0.828877624218744	0.829964104101514	0.808254541396261	0.82730475636856	0.841296057486448	0.813531638937982	0.813418474303867	0.814071187363687	0.818770883857535	0.820460305924222	0.818702770617436	0.814541888434218	0.80950024265066	0.82352553084144	0.821445396484608	0.807194791240973	0.826392858251893	0.823412945621208	0.816133161952217	0.810483493577749	0.812045120068715	0.823344940042361	0.819620860286388	0.822487533695936	0.799860749661946	0.813223162411715	0.838428393278175	0.814784471253869	0.819732372302395	0.82475660957016	0.824296455063509	0.836259829897867
0.821710736575008	0.807492627316926	0.80951174033482	0.806325396242628	0.814331020108029	0.803165625975861	0.826708342624193	0.8189510528395	0.811423667092183	0.802332808099049	0.81462409459015	0.808435007868948	0.827824659101513	0.813499301786082	0.818696584171867	0.812728659870652	0.812884357643496	0.816034776307883	0.814831566427883	0.803562321104685	0.812552971362324	0.817418729369445	0.818814413462057	0.824850415530453	0.817892411195356	0.822882795410256	0.820478623132575	0.828362300769006	0.833509387247145	0.810833321479594	0.817852577721771	0.810143690918453	0.817856258587377	0.813371457231237	0.831451782275929	0.81115809782974	0.824955257311804	0.819663435492657	0.827319406358771	0.805560121535251	0.809715953453808	0.806093593248638	0.819880699591692	0.813884743859393	0.79571203982446	0.809656081302991	0.808823984118345	0.818272684319967	0.814299490626948	0.794873235807791
0.817045750708175	0.816818809985142	0.806952897830638	0.80197521847708	0.815579405124597	0.820606608143098	0.808036267706353	0.81151661638194	0.814454417842482	0.819321204782254	0.811672210103948	0.8195951575264	0.823171732025509	0.815444579111245	0.812087785678009	0.810036176416547	0.807945783621185	0.818604577321466	0.820283173311696	0.820926272940027	0.820658209368692	0.806496151640041	0.805974092136915	0.830363614490814	0.817051950370605	0.804855806757941	0.801823013498903	0.819058296607519	0.791386777566245	0.802348416344603	0.794157037635751	0.812229973384865	0.805681215886525	0.8081116242812	0.818138504059283	0.802554275991083	0.814836748535796	0.791479847778728	0.813426945149813	0.825319741737959	0.809056750413423	0.811035704861826	0.804721955911945	0.803463951390675	0.811385123808866	0.810265626322912	0.81269830133109	0.811280762949356	0.829675020843598	0.804105810534444
0.813630126222435	0.81347758217548	0.821382115461719	0.814808336181482	0.807838787567514	0.824209524865248	0.81939606355442	0.807003375291878	0.81608455336817	0.799227800053043	0.815788226194634	0.828258575574108	0.806226813909963	0.803625690747436	0.800345953707212	0.826195724038235	0.812083905450982	0.804763276268828	0.813807197031058	0.81353240178587	0.801788888148931	0.806363702059391	0.819086804654478	0.819548493800541	0.800748497051197	0.811991591231267	0.826559382994469	0.82653976353262	0.81953188020573	0.803160330537172	0.814417607756101	0.816113910051512	0.810060332667823	0.822606014608911	0.794622166378842	0.806679135687394	0.804606814342711	0.824059546141963	0.814819845806289	0.810241917613696	0.818736532884387	0.815055506235328	0.821759525619458	0.815228701477861	0.813204060729181	0.814120512848123	0.823337514201626	0.8157270438622	0.803689412918001	0.824346914883748
0.809495891660574	0.811850104918878	0.811270444668982	0.8096349309118	0.81645412809509	0.831886830116511	0.813357369993653	0.824428522673748	0.796720399560901	0.826233477214708	0.806160121455286	0.816102211909365	0.8163493404852	0.817760192546007	0.813895832495651	0.821824824734957	0.793884201997366	0.80155400707162	0.820764626408704	0.814448597800849	0.806208409982973	0.810754275135966	0.824267403094116	0.811877419303509	0.800480461907355	0.810956365237712	0.79278960503087	0.813997158767796	0.800188012271723	0.809587746738013	0.817090451884497	0.802541115212453	0.810811256047246	0.815557489435346	0.808418159497932	0.811619321105708	0.814375278412992	0.827168305680481	0.809001849760145	0.814768992681311	0.795976319391633	0.797854269891359	0.812403507703194	0.807908484606404	0.806165661881081	0.801690712854761	0.820474111472809	0.807703118024006	0.828330920712642	0.833153873267086
0.808679687175494	0.819813676028181	0.801638176280897	0.800612776815251	0.80611264054708	0.823926217350407	0.806946560919496	0.802008162906223	0.804900705511764	0.80451839002812	0.827737019824853	0.81659119333822	0.824643763658184	0.824904342268353	0.818536026513082	0.815450860808522	0.798097657882378	0.813480659032043	0.832511725522899	0.821034856176647	0.83795942410144	0.811824995483043	0.80991577808341	0.809502661761607	0.797631935601729	0.822744881143591	0.815426444165719	0.814695820300353	0.815976110685926	0.817120853841374	0.810302814904825	0.827800737451963	0.793200944244875	0.803509326507676	0.81996730372875	0.818761727265687	0.809149633599909	0.815066626920433	0.803578962965878	0.816350553933051	0.810120018132938	0.806234349303667	0.812535536476719	0.81492759442894	0.800496472045149	0.815483745340714	0.804968477993653	0.821986587996384	0.801545818606887	0.818597389546498
0.817491850491438	0.808316427445047	0.820020296950703	0.813941960170957	0.809214561271714	0.812083298500755	0.829901408770796	0.804503647626757	0.804118608602548	0.800300825147763	0.816827208908327	0.82169743524081	0.812394039568735	0.796924995995	0.815502655499143	0.804007844768163	0.821250604493083	0.796795326532071	0.79080928929633	0.825380666958782	0.813994534504218	0.806933096003175	0.808056254086643	0.821985517270714	0.818094846119584	0.807302788036864	0.810154271730185	0.808014813392957	0.807532932241902	0.814169410447461	0.823632673273961	0.807937436291922	0.820078714232848	0.82237607967513	0.817450158476723	0.815730908613919	0.809450007497858	0.814297233015844	0.81722527118171	0.821520565362757	0.813091551501222	0.805138900768711	0.813116480429347	0.815665798375455	0.816415811049232	0.819009886011753	0.815528127659908	0.817669145496823	0.819446097841241	0.823377428544979
0.808855723656044	0.807712200955578	0.819533213718846	0.801103948919396	0.809661861690994	0.823966328685288	0.812964447399098	0.801729638920188	0.81377546079748	0.818908742185456	0.810036780383558	0.824905854179259	0.821979142179358	0.823069005115181	0.80685850793803	0.8349565316431	0.803580633545878	0.803605393669597	0.818047013602984	0.820934995254017	0.804540247329383	0.816077924335929	0.815096423903756	0.816051833504341	0.816133150843417	0.823982421863442	0.802928152925505	0.819542446874949	0.809034128865164	0.816555395165328	0.822604721443068	0.823077667464396	0.81237261763743	0.807791936639229	0.822383905590151	0.81009149652361	0.810036508772547	0.804101661233534	0.811605474454311	0.812079881482346	0.81180701241126	0.818413749225528	0.804126580847424	0.79443050354087	0.81733340760218	0.806180698406456	0.815045618605259	0.797055229266911	0.801580345634053	0.794603601683912
0.806728712068649	0.811974071603182	0.826626004996108	0.818149406398956	0.796173066452867	0.824437555983609	0.79806055117527	0.808372486733675	0.824727493440669	0.808115651351428	0.814463497007428	0.827318227929572	0.814563167439641	0.820200366253454	0.817207891579281	0.821588752062095	0.816710195193618	0.814640324041181	0.800545696493705	0.815724760152016	0.826167786761162	0.816115971308741	0.811468905177994	0.823717159609436	0.806991538048321	0.804291727457651	0.805644514060845	0.824726393714999	0.812893928856497	0.808913108068939	0.80216078971023	0.808281354366151	0.807406808341904	0.806084614165642	0.813312432580762	0.82862401950967	0.809385040421444	0.811677874656586	0.814379994511157	0.818561889134422	0.803162001046197	0.822711911745741	0.834115502731157	0.805893193511048	0.808425620446249	0.815714262996794	0.807848499279559	0.80153490926261	0.810685847276252	0.812362715369041
0.798393074131117	0.823199420399687	0.824273007591737	0.804508711500864	0.816593172680636	0.811288326133752	0.811744479976248	0.806486051256508	0.80838221709989	0.807923046796653	0.803220705501382	0.811860558467899	0.802564776982018	0.824855140542845	0.82872326619979	0.823978653337031	0.804722818669862	0.812057908834847	0.805513771173082	0.828273307679049	0.79061250857546	0.811508065490561	0.823230281975322	0.812917692560262	0.820560940963282	0.809198231008552	0.804326428593759	0.822556737400096	0.824989615725853	0.828018428996269	0.82073966294982	0.808087760654473	0.797473179553537	0.813952048818558	0.804571234783834	0.830643720717104	0.794606156258218	0.809059222663818	0.80168354664331	0.795474361260739	0.815590191861913	0.811847424648678	0.822813891791383	0.802948589397586	0.809966173788797	0.807106656695885	0.806962567879294	0.814055443876946	0.805181477504215	0.828617425816473
0.822831239987473	0.809054989890825	0.805138764105169	0.817198149517379	0.809521502257705	0.811413020585287	0.808844702991326	0.810649362743103	0.813761696349218	0.807993591206133	0.814574138597608	0.800157124020506	0.808808586807865	0.810314121819039	0.830197359701319	0.83049360351563	0.819441515257025	0.812243040452619	0.816890921366135	0.824734055095929	0.808965691174862	0.824615813781409	0.818884779446572	0.813524055227494	0.803610556592835	0.801603107911294	0.819041915538496	0.815671375318743	0.819296864983591	0.811557019953014	0.814080313301853	0.806434206317982	0.817582709382965	0.812192260831454	0.814787066202994	0.819139323868728	0.813335725724757	0.82032836175206	0.831920458044396	0.815139287894337	0.821718321967998	0.802380989741011	0.821530637020681	0.820511506048369	0.814348232631608	0.823363472989245	0.822603849587296	0.824862249464781	0.807830625761704	0.813550560420828
0.809551815829841	0.820928180719805	0.807837136733963	0.806308763171317	0.816290383093492	0.801878231777309	0.808878574560909	0.80174578584937	0.80919167476395	0.804962761380161	0.809395882302003	0.819643656603583	0.812094981774182	0.7895977798388	0.81940583942743	0.819859618915909	0.801515268048241	0.819715880618345	0.806228900596692	0.816510890827916	0.809618309814415	0.813127756409172	0.807664584948513	0.812296814143172	0.813492164024214	0.814598942672169	0.812038634183619	0.836666947967267	0.803543272077336	0.813359139957589	0.809438180994586	0.823346759320688	0.813332261426854	0.808304467683799	0.819685883168026	0.800686307284363	0.805792985840052	0.807284064200963	0.809463762475197	0.81227330346554	0.813745109003084	0.823026991579159	0.81667032764828	0.811505600322377	0.828179596975788	0.813188345923858	0.809312156161895	0.815767463157382	0.801078150849621	0.827782341617036
0.809317870568189	0.818290965217881	0.814033127601608	0.798570099999703	0.812829047819864	0.811181993122043	0.797458265371126	0.814140192644195	0.811878751677209	0.809887943441782	0.816908611536155	0.821956386530179	0.801831597506112	0.798846573013049	0.828468707469588	0.814108047694425	0.832776799247919	0.811967121308578	0.819825226039593	0.81482981975488	0.828041880394887	0.809525408783747	0.815375537617018	0.815063230584806	0.809689964475868	0.812499546017187	0.823920074013502	0.831662295874739	0.810467688256585	0.809330637431029	0.802413854056521	0.803627445284852	0.794805163066835	0.805899512405204	0.802263846011226	0.818648647033542	0.815715922079377	0.808156986751885	0.819463507165696	0.798874446295043	0.82321309847708	0.808499507063779	0.816299759422936	0.799405937395629	0.817653003975816	0.812007464598538	0.803161550764661	0.816407815364276	0.819819780118259	0.802454234192483
0.807225675746044	0.810711443519162	0.807824202128854	0.817309445310897	0.81748711881867	0.820271167205705	0.815010314696481	0.80882188738208	0.815236835674108	0.811111001276435	0.817037738306451	0.818575172818043	0.809881385519699	0.819600447976076	0.808227418385827	0.809747416754216	0.81583232470482	0.810846440922199	0.822013480567496	0.811475897377525	0.822693336882859	0.804266391761219	0.818360607073137	0.810612314964948	0.816723082628026	0.82972812357199	0.817581043992685	0.82028386490395	0.80268067595354	0.812273856998737	0.805169080609206	0.818687539278546	0.816971995660155	0.811560060546264	0.81638636903381	0.811112718890137	0.822658235249842	0.80944391821513	0.808008673883151	0.802543349691468	0.817224030953219	0.812890057322913	0.804765963294397	0.818239375089817	0.817736205093756	0.815136318624472	0.806277213888477	0.81508165494509	0.8114842671432	0.802170003428229
0.816702951609679	0.817528642996293	0.799633858968643	0.80061732527837	0.814300543691411	0.797454627374791	0.812586557764182	0.815121432843573	0.792714109496805	0.806046522588591	0.834952107657731	0.827552743082538	0.799671714447414	0.802347845393087	0.821657332242926	0.820415123227317	0.823031609231769	0.810279906494927	0.818865078931785	0.813179896653578	0.806575685341088	0.81829323215533	0.793696230296909	0.808588517095412	0.812593158528466	0.814941680926202	0.824087304965657	0.800246945645632	0.80646406534018	0.814556236900906	0.80427888701609	0.806789653556543	0.805154958055804	0.8156719154016	0.819391065389712	0.807193254812262	0.822211334438004	0.81125454085137	0.810610350373608	0.807846399990629	0.820007447856119	0.810722492309129	0.80997299237246	0.809043845027191	0.811871796630046	0.805016624897194	0.787871346360389	0.805907882175317	0.810392557856553	0.785507738058279
0.817647251639653	0.811778531045625	0.804846355932741	0.807555825430547	0.811166123565985	0.797739565496229	0.804586472140774	0.822569323853094	0.822932285963256	0.797748037720102	0.830464050560348	0.807106211349482	0.810778418548973	0.834441858141935	0.809592871041461	0.814748359202664	0.816610295310664	0.80502305933476	0.810014096961964	0.82293264130883	0.815736435212087	0.814408556565071	0.818827566466695	0.812059246049232	0.806486107786718	0.818711766601648	0.821736972918454	0.808631724379989	0.80434788230958	0.810386262192642	0.819526297158818	0.809168516876358	0.813836553829359	0.821844148700135	0.813769677116551	0.81480877916924	0.803996929296165	0.790224425207434	0.81508434016985	0.822309637771639	0.804621202944374	0.837370464828561	0.797434673499811	0.812270429183957	0.810672485470398	0.812226009466164	0.828605154806227	0.820438321598814	0.808029123410428	0.805970149642021
0.809627920006905	0.809800936099215	0.813060412349674	0.806593295278673	0.812361432074735	0.800905777381945	0.82323125009561	0.805968137656531	0.807941174448094	0.813845195957833	0.806154207712843	0.813566473596049	0.822515633596637	0.791395605130692	0.818737086538692	0.817253221639029	0.815908792850123	0.826503333530002	0.818910149620127	0.815461179330933	0.815039410086572	0.812538592068606	0.815122957373836	0.806415193006294	0.786064974540107	0.806435595320673	0.807867769268186	0.810839788112966	0.823767989740997	0.807380721074854	0.810021197477553	0.815102304468282	0.809690776341943	0.812634290437581	0.807127005159334	0.804431722039715	0.810155142463297	0.807514940620574	0.821853914638975	0.817560609460581	0.813526499732238	0.804273398450638	0.808668979092303	0.815083310963636	0.823909627184448	0.815103768587119	0.820969537160828	0.808708183294538	0.822763391138307	0.811778350221679
0.814508455170353	0.808729841306303	0.805498779262798	0.804113598532631	0.812633495260041	0.815676102126553	0.810619129507774	0.795909833784385	0.81413959357951	0.808943298296076	0.822560106842737	0.800481145973054	0.806101426385755	0.809230532527877	0.817323501919606	0.813981679330694	0.819883595676809	0.79589514013922	0.807162888003749	0.825535551681126	0.822990838221117	0.810027367738691	0.816236383224094	0.797748563895315	0.813510503159137	0.81367567443519	0.799141438311366	0.812087190822994	0.809891075347872	0.824451692704981	0.812031919019804	0.811262084494743	0.792409986562676	0.808421145444162	0.81715658474965	0.795779189108142	0.813323739347988	0.817028444374388	0.805357268023086	0.817058407538838	0.812778007286003	0.801438634430429	0.823766859377765	0.817544310959758	0.820429825596961	0.81982416152273	0.812363667448697	0.809208504289844	0.823000572647259	0.804471306483249
0.805289940629027	0.825907959098719	0.826226307690923	0.823266800357632	0.801183649683921	0.816918889572235	0.804905997938021	0.830786492437315	0.809576220274305	0.817745677424623	0.826256462116809	0.811059180254003	0.816673345154038	0.805040908440165	0.809906295131881	0.815977835287652	0.816960167292705	0.813366833988225	0.809509051190553	0.80673477476836	0.812614634033	0.806352572012094	0.807977372065195	0.813412402126387	0.820656876764413	0.816473032872237	0.814831999034388	0.808644362678765	0.813874809412586	0.787663238404872	0.812397716240186	0.798587117928917	0.812896142055373	0.812171784004952	0.80399244751986	0.811376447279775	0.807163576387814	0.800995873860072	0.790816899869545	0.797349664260855	0.831469484975911	0.809388601768475	0.808021142424179	0.815677443099254	0.81061487692027	0.798980057203047	0.803160652011975	0.806779262214768	0.80488233209237	0.810551378050019
0.811881112432006	0.805449209943194	0.803464214169117	0.808000250110215	0.820226286475949	0.799783033045874	0.809349898398921	0.811491453461628	0.80943495064535	0.818157941207733	0.812909713214141	0.810534623218427	0.819381713429852	0.809898590994171	0.806423542066902	0.802308637167902	0.807842349310089	0.820466251704015	0.803967500464269	0.805261957447736	0.799304023579815	0.810104697837413	0.823451476693188	0.811585291754799	0.825025221978662	0.82095984396058	0.807893120935891	0.816198421949288	0.826530226604416	0.80454799532792	0.81278352087223	0.808910953706572	0.79926035161061	0.818980606476747	0.812643135197683	0.811804655911253	0.805255712056697	0.802159825054339	0.793952202091563	0.813363230687222	0.809251214688283	0.810169342185128	0.813460780279751	0.800758957136056	0.800576507394627	0.809186038738491	0.811370577894213	0.816712533710361	0.816054419500862	0.814504781320745
0.798157838381923	0.815379703672996	0.803592653829906	0.797083646147579	0.81546455297257	0.799126639670829	0.80862635361671	0.814634006683322	0.80216597778819	0.804826814407467	0.822141351622726	0.811199208508848	0.805594524427044	0.808123548617063	0.818870020203845	0.813766458404912	0.820655874641362	0.798603904543085	0.829971153550399	0.81396368681171	0.812005694828702	0.813511032905999	0.804906954075356	0.812044896174799	0.796822236241621	0.818493225448796	0.834291102417086	0.809843359417648	0.808769363235386	0.811322284528163	0.797046714999277	0.794689349529966	0.810431356588086	0.807514889026646	0.803240518483601	0.819847517333041	0.813368760723871	0.808906962747172	0.802908408805374	0.809669585706041	0.824616633747251	0.804092571238487	0.818755106734072	0.804095597084629	0.816428898079177	0.797433734187443	0.811371463968205	0.812267199049327	0.815117551145166	0.825256620450669
0.822322886644016	0.810226285308832	0.802891134216596	0.816274689187332	0.822520264930753	0.800337768928628	0.793260294883267	0.815941720585714	0.803626311922263	0.804803982790021	0.820661723506542	0.817025453310005	0.814338510166936	0.812161594863301	0.802570892945041	0.804807858482332	0.798332174373248	0.821220423430463	0.818660517349126	0.806152305190959	0.797264302464756	0.831563439920862	0.809610377970466	0.816610854944142	0.78401022428198	0.802918651149569	0.84249646030268	0.810973339875948	0.811316787732221	0.798764114441489	0.816967427804462	0.817855040138942	0.795625422284269	0.825000850980163	0.810890036504654	0.808590986271209	0.785690278976068	0.801791924708192	0.806403366837037	0.813705311488965	0.820209542212819	0.812789096401038	0.811545057724884	0.819781148287538	0.805191482162616	0.810769579020696	0.811032214250356	0.823783417400399	0.818328842468606	0.821245704287309
0.826922787266685	0.821016745497271	0.804201375707295	0.805173360141536	0.80425598888105	0.812555780836882	0.808451168411833	0.801767260994015	0.79645975113421	0.798237483487865	0.79693809389037	0.809085688646253	0.798253816567025	0.820307564288959	0.81413698830221	0.831883007820338	0.817113980254881	0.801970998646293	0.814192894719567	0.809206396854003	0.804456714030132	0.826171638395743	0.805530525770278	0.812227815987528	0.815389474940203	0.804508387269208	0.814431063278366	0.814235536079547	0.806939773861757	0.811603153450543	0.80711121539571	0.806448393016963	0.804357292138751	0.815008341050506	0.810752316990811	0.810423123068544	0.805667780296786	0.791353763499744	0.811379742384316	0.784547011607246	0.807125048360129	0.800510271576389	0.801157800549008	0.812135619125172	0.798670864707476	0.816766960181865	0.805961163334097	0.814976150945242	0.788659778712835	0.819761573468989
0.797842639140548	0.816453432961987	0.809382913348482	0.812037433259064	0.812524841086607	0.803870167226982	0.805175363084386	0.795914616446291	0.814274299886275	0.823114511358311	0.798407421628341	0.814396388872945	0.79221840907241	0.813656457215423	0.810291992385659	0.821328792464804	0.808018295931121	0.825434778895263	0.815137978790377	0.814618834333062	0.816663283708249	0.81819047841725	0.813201957718589	0.813875748520814	0.812169225067479	0.82199340856508	0.803206218267648	0.800922578359504	0.813504482515089	0.823837311594839	0.798321233973885	0.800890456921102	0.806035222247197	0.829069089862752	0.815656768821717	0.811854026273166	0.811399574405245	0.825806470396549	0.8019988659159	0.808651650105523	0.812717130149735	0.819902710818916	0.807149448646228	0.805057067706899	0.806709372694053	0.803005427556845	0.814553317109615	0.80891860951401	0.787594401425567	0.806968028012574
0.81484864977255	0.806993788770225	0.796211803632969	0.806936793071267	0.819882391251715	0.828402748175655	0.805675558108184	0.798016038519036	0.808043088384645	0.800435253654924	0.80600799790505	0.808789890217252	0.805474913248742	0.811427734288019	0.796642536815031	0.813126335706612	0.818544099516969	0.80154176786975	0.808499020267169	0.804630321475689	0.805793408506574	0.822832158887027	0.810953092739856	0.797796367958409	0.802301580379702	0.799925792025157	0.814413900362355	0.800904096511447	0.786673183203623	0.800057750002726	0.802110905947126	0.821342503969895	0.806585469959877	0.800121763508592	0.821037810308607	0.821730917171905	0.812846194255516	0.820691238763108	0.805524587998216	0.816058811787387	0.809705336313007	0.80548389479622	0.798352807640409	0.782681465739299	0.812040568531064	0.809257096375729	0.805257452401307	0.812222157502572	0.808212109838332	0.809408610242797
0.809351916027044	0.804626972469362	0.809676686504348	0.80126956237052	0.813826920014563	0.802748098850969	0.820573544641966	0.811684405188853	0.796119979343133	0.813728392854222	0.808418887430697	0.802779239157997	0.799481872825378	0.811854273911195	0.814838743878643	0.811493286616418	0.806424015097638	0.812745932301197	0.801495451495379	0.801978114949064	0.794221113363946	0.810341575308906	0.83781566885562	0.813482045805269	0.810409892247564	0.801790258130337	0.802788918416787	0.814615412075751	0.811112016686223	0.808267850607214	0.800903574068514	0.80356663164927	0.809610536526171	0.806387030869789	0.823361808260877	0.819813372080039	0.813689310706856	0.816818742294712	0.787811378810058	0.798902653541278	0.814803856128289	0.805289568116231	0.811858105261028	0.820523644208853	0.804817117553371	0.810227817631794	0.811640333133837	0.805401631881249	0.813193055282004	0.805399287315198
0.81249991775676	0.818575591976871	0.808773404588412	0.813492103892562	0.782533225227627	0.8080215768437	0.824952328342095	0.796856212844474	0.804159172798544	0.814185682429415	0.797461183519576	0.817149952713413	0.808780813654987	0.805607205553576	0.817891567199336	0.805879994500113	0.813933878752352	0.795016206505394	0.813452931877634	0.828294276448514	0.794781919308469	0.810336629564805	0.81827796427475	0.816196620791652	0.807866816288538	0.817351435319589	0.803663822417335	0.80164636238749	0.812979803271189	0.785036347435479	0.813428722108775	0.814038449294673	0.795520261229511	0.809275725937045	0.809106030792929	0.81465620658425	0.811110651868308	0.814470673818209	0.819040755972439	0.804816787198945	0.824715114289857	0.812945806820504	0.818602943080468	0.802171639096558	0.807162453176139	0.817689019269548	0.805427044390295	0.80290257076915	0.805171690971856	0.804589698344894
0.806285444336148	0.802142807306836	0.808804019335652	0.803567930863938	0.80152063583196	0.813145619166529	0.816143870759811	0.823174325318838	0.806380575962286	0.791997724549152	0.815076210626247	0.806781677517864	0.811249516814399	0.79696923815807	0.803587149582908	0.832398503053263	0.817085164413563	0.784292603637545	0.809800735928424	0.798454864272165	0.815802169656064	0.807151780590786	0.806298846863604	0.805880286120699	0.822535465281837	0.820202909504554	0.80550882436233	0.801186890049622	0.81686275879045	0.795458875195951	0.799649119911765	0.802341250386639	0.827658705799109	0.802151826571804	0.824199206512138	0.810921771764575	0.802011605252158	0.805006408373413	0.817792687871533	0.793394176012102	0.808941117839259	0.803064288629908	0.804639447530305	0.814629066018196	0.811305293093855	0.803779119591489	0.810910078428189	0.819758722497773	0.817227918911107	0.801955525552816
0.802074643105854	0.805763950385782	0.787526546382292	0.816399458954098	0.804597026230577	0.804949935825094	0.813241550738372	0.815829029983325	0.82953057481416	0.804428259834562	0.814093182660973	0.810090681082684	0.805435417623191	0.795675145867127	0.801607645242121	0.816434785767589	0.80273026447239	0.811420222679523	0.807102170058998	0.811979669009923	0.820040163397957	0.829275181556237	0.808472461746261	0.820122266146547	0.825446426384824	0.800425549537711	0.81723667786305	0.818100991728196	0.819046533170942	0.802275916655873	0.80002639052145	0.807478781002725	0.815106092883015	0.794958230894322	0.82161954420146	0.801191644765837	0.815390330332665	0.805481559791691	0.813976704337922	0.817783111972426	0.816894013637634	0.809670484163399	0.801365566198503	0.807686333638456	0.793260346651119	0.809319251650554	0.822167312153996	0.800953710921456	0.810822219791875	0.816431054023903
0.802966173874062	0.797845522180622	0.803186172771682	0.80521893122375	0.806028274899614	0.80093305055282	0.808206016833577	0.805680771352253	0.784905257385208	0.802690021431605	0.808073221197874	0.795970810574742	0.79857480377174	0.812647152080717	0.800539664796378	0.809706402998118	0.813044674084622	0.815422552023287	0.806227750928921	0.802417392736719	0.809572963427213	0.810891366211907	0.804275269790562	0.812721489227651	0.808019169966835	0.81491914587591	0.817400731775013	0.796785136435409	0.788101730978185	0.796143735905534	0.809288255828479	0.800535501800859	0.802357488916688	0.813274554826288	0.801139717136102	0.819183545284105	0.822070312706792	0.808972588482027	0.808100947795885	0.805415778064256	0.783055563405657	0.80298272789301	0.810242549948206	0.809185428275582	0.820319046241219	0.817854761765172	0.810163053504077	0.805161095107873	0.805479412947313	0.809440216754648
0.816535241752897	0.812647939676831	0.813644101869053	0.811641385564311	0.80901547601736	0.813394712559044	0.821441711546025	0.811651737578737	0.801948065256898	0.808173972088583	0.812690123143191	0.802926233873674	0.800453291606705	0.821492286584346	0.817450602331689	0.81978225306201	0.799271831509834	0.810014167064237	0.816257842998156	0.811995386318006	0.810074694193234	0.801927004063198	0.810173522593899	0.806296051175604	0.812602942000471	0.808503258324649	0.802106946905281	0.806396594030787	0.805986524389358	0.799813030544177	0.811444016772298	0.792943714654267	0.803442445448629	0.785649257605323	0.803711170941201	0.815474549812369	0.82155510667856	0.806471106703787	0.816017854831875	0.809323829242991	0.814097861017321	0.81617867966016	0.802499227693955	0.796824719729132	0.802801264593582	0.794519073013641	0.822264587949003	0.819462947451657	0.810063318558102	0.807041924520329
0.798206096249356	0.795890115652369	0.803950741112678	0.806039139986844	0.816069117447375	0.805404050727026	0.796310928256223	0.805256433095215	0.809840725425811	0.795989621934574	0.809021560700921	0.814773487497642	0.80461933014355	0.815761291046236	0.808013687392593	0.794519717340531	0.825864490802474	0.803118006122676	0.806324647948536	0.808210501199718	0.801503317760627	0.808586264826717	0.81974027078791	0.805203252374553	0.804902609862146	0.825302644450113	0.819305326877807	0.811894772681116	0.814362110400165	0.805909916096818	0.811326122610008	0.819040310231875	0.798263554505642	0.801601892617495	0.795256737989751	0.805754141672552	0.80586593339693	0.810941266967149	0.810960302069069	0.81148093657971	0.799664834393227	0.794018062997807	0.798216256624164	0.828866575115484	0.812851403296771	0.808860014222498	0.806280832938075	0.818179620610854	0.802584535115906	0.797497899100133
0.805048243815331	0.816527943258089	0.797531265394386	0.799065692691361	0.812327236948248	0.796965560498464	0.806182215169584	0.810973252365393	0.793040090566975	0.802920621084922	0.811853489787137	0.814350713268465	0.796204675985492	0.814508865133642	0.804499062570158	0.80916036083643	0.810335972517424	0.804728276440547	0.79198702209802	0.81519059914673	0.815683270403602	0.795878257642305	0.79455443378531	0.815864312605885	0.811572142120664	0.798799079407624	0.826133988045927	0.80675668558768	0.798612760039338	0.803630257081889	0.807803420833662	0.828112480137925	0.811871751888495	0.812567556708751	0.797126254646776	0.810904571644448	0.809712422481871	0.811866009481136	0.818289708683239	0.810674712728797	0.800096951171851	0.821575496060633	0.821393958334062	0.809003546950268	0.815880449802908	0.808255534153519	0.794861993987024	0.803491721791393	0.797399586313074	0.83502695306508
0.804712784366582	0.807868829179435	0.812456267649267	0.794862794955939	0.796804659336148	0.804271854369406	0.794769304865076	0.81664630833015	0.799481464769716	0.804139208087101	0.803834952927486	0.806556265891948	0.805021151695965	0.809754761629413	0.812325443950242	0.809573251368274	0.824755525910424	0.815354646694333	0.800249618666354	0.806895338222925	0.807487650731638	0.794337997241477	0.786924179139066	0.807980201231279	0.817592582469919	0.80885213135568	0.80696683163995	0.81343038830615	0.806623633165989	0.802169931259791	0.803463391103346	0.810998584171751	0.820401599606827	0.806892507032707	0.805445380898595	0.813284668257184	0.811121239334568	0.813157345104467	0.820957132666104	0.823988347923003	0.817220623650254	0.81275360231995	0.802081974388888	0.808376932764285	0.804887929790668	0.804518013010754	0.814303540294415	0.814463551282114	0.80562209751241	0.811112487388195
0.811828035081764	0.80073496216088	0.815690212151472	0.818865365866606	0.818616648486921	0.797408364502424	0.815406399313509	0.804729591916007	0.798566183942784	0.791226489721739	0.804353575396927	0.821802567131565	0.811730544132277	0.810852980551972	0.814615790424542	0.815929228779181	0.803542959253414	0.812442607108543	0.800832134146106	0.813783918509451	0.809660749953161	0.811182393603676	0.791168238933696	0.809931995811866	0.808257054769511	0.813577579717144	0.798451014274657	0.799908658208588	0.809379030619983	0.805767120840702	0.802982885076656	0.812125226755975	0.820279155581079	0.81839440332874	0.793449981906788	0.789076730742551	0.802406068339607	0.813431380159523	0.811271023153161	0.810952150605811	0.80715706393153	0.809451952436276	0.803795356302169	0.813262991605448	0.802542997645109	0.802963228176559	0.793975188209396	0.796483422227053	0.81663762969984	0.812779933270191
0.811886111565897	0.80863899789037	0.784454274544368	0.817305128107337	0.803853744077944	0.799591971753747	0.806038256748768	0.798333623626557	0.816999827130561	0.797085462612715	0.807087561034217	0.806017196244138	0.819434333256163	0.808447037138417	0.811582779693445	0.820369604022597	0.80856666396612	0.802259334861147	0.815974621291868	0.81564698451501	0.803339111816637	0.814447416996153	0.818713885599588	0.793846465365447	0.806053519640373	0.796506161038072	0.806967793081627	0.793979098041413	0.809926037148027	0.802188300244336	0.813586549841257	0.810426625513679	0.814530233302363	0.795825761828986	0.805003738728649	0.803959272280714	0.796069066301989	0.806318989408984	0.811079990223652	0.802590697385696	0.824741584033795	0.808848900817101	0.810629443565999	0.807465495820606	0.804208915984013	0.802564850103747	0.804780554953088	0.808030234424615	0.814756346588331	0.805596115334299
0.794380390361415	0.807013328985477	0.798983896943933	0.822149070001375	0.812911139035844	0.803599351259441	0.803940288582265	0.80592888449569	0.807152122981805	0.809353374762659	0.799980437896353	0.80345715816493	0.806304962035707	0.804366155710304	0.811398521719285	0.796092818238781	0.817747541112779	0.804491105244626	0.792601146682362	0.807619217292804	0.800591908173725	0.814051663189751	0.810805509896569	0.801234174067438	0.796915677996122	0.817927929726162	0.826224349126504	0.804524822826678	0.817443316376551	0.815128010094775	0.810343008185445	0.831692076596609	0.796779768847706	0.826873812554225	0.810923927834507	0.828270624848695	0.810591854929223	0.81217431218185	0.813082067396537	0.802015448214294	0.810287662221559	0.810742627042381	0.806961222716414	0.784271704873907	0.815374009896499	0.80726711878205	0.789024980615702	0.80319097060635	0.808740778639173	0.802633275860106
0.8031454281564	0.815247033545444	0.797100347713466	0.808584279144415	0.81127161331782	0.791331967996532	0.798553925417876	0.803187509039525	0.810332659581665	0.802866134214093	0.794248127991705	0.807879951289313	0.802597137239561	0.808946222198651	0.829073488262347	0.816482767778643	0.811533728529934	0.817597987675008	0.820138975051003	0.817633697135391	0.816479122745596	0.816797963324428	0.811066135265813	0.798137832009709	0.794088166729805	0.807200892817001	0.801269957902817	0.804262187606802	0.802812175901889	0.802857209822818	0.802284005832138	0.814943162881443	0.801966100044349	0.800922696820821	0.799376160004791	0.80576374747126	0.803503789151081	0.804849667280697	0.791978431819515	0.793759859728165	0.812251631527339	0.806715557991307	0.789694641957933	0.805845559164837	0.816604273989137	0.796227501108577	0.804186376104133	0.818402717360562	0.811976900379189	0.814315525226249
0.816744221190887	0.804026248297945	0.813741706082445	0.803978644958804	0.800852537164417	0.792280055441576	0.801418149224954	0.810199023632103	0.811587395401238	0.798726455592092	0.801306922975914	0.812480517199514	0.805371173224559	0.814544319917936	0.804158755103178	0.809955347837142	0.809460918650438	0.804847474946937	0.819192048765901	0.788179906445526	0.793550258340805	0.798999581529263	0.821356756146298	0.811208272879147	0.819393340094029	0.801023176003401	0.803632131909606	0.809474428093218	0.809308110715607	0.817470585538559	0.817891655920239	0.823264974466228	0.813226221249421	0.799238342888148	0.813028640657063	0.813196586432135	0.810841350816345	0.805632613624839	0.821745207962738	0.810907648316301	0.817894503177264	0.815239358453784	0.791915707732669	0.822234323093057	0.790255938168985	0.784506797520831	0.81391673160918	0.811763906540163	0.798897586253431	0.797226707043818
0.814471600759416	0.791508625058518	0.794813441225829	0.804919647485221	0.831614045136503	0.803542454464851	0.80782892790598	0.804302949444417	0.799034960545749	0.799522580105007	0.795929884569911	0.800561920964193	0.80965255122528	0.8146721076736	0.803258510488485	0.80845347063063	0.815635911455134	0.813414744280704	0.806638473480312	0.807980657550701	0.79310175289019	0.792845464406324	0.822076414643225	0.794049544388791	0.812186403780684	0.788507407852822	0.808012725651778	0.805476170416868	0.814479562824414	0.805364329073888	0.81341941445986	0.825812755041069	0.792163329172744	0.790687836058056	0.810808303350571	0.821585014058105	0.819200313929174	0.804948465080286	0.816175320741891	0.810160242818545	0.800732748812366	0.808409037559649	0.811588163245829	0.811627212530411	0.805373873711646	0.800252089467437	0.814233416939453	0.803908489081916	0.82051993721611	0.779756131997129
0.795728882936882	0.78785572193311	0.821997212801388	0.806538756875025	0.810387611733335	0.788198369419171	0.809066815565726	0.804581370482953	0.811669037562814	0.80778346337798	0.80482707081316	0.817927521453279	0.81064667261383	0.802607216926813	0.802598337624847	0.799371279995656	0.8078075255773	0.792066734456867	0.816716689140794	0.816308278084758	0.800174693885983	0.815437227926849	0.812242880074997	0.80175646999625	0.818290101418821	0.80280699126381	0.793470003227018	0.809982474481268	0.805391085948207	0.801358587540891	0.814208296004218	0.797551629578725	0.809419358102682	0.809171132876547	0.810148075099535	0.813983669875957	0.825369109136984	0.803950002952256	0.810552171353889	0.805805911466338	0.801192242347995	0.789625032743167	0.818319381233849	0.796003914377876	0.812170026455649	0.809370483325315	0.809827863895532	0.800831622634691	0.794569310390738	0.80936356309883
0.79990863675385	0.798700860643867	0.79110369464517	0.8204942632641	0.799914044760318	0.803421473400978	0.782954142561069	0.815819831866782	0.811161904683745	0.819837743652597	0.815196552969149	0.824713313823061	0.809072882622259	0.808391755418043	0.816270133259029	0.817955213505744	0.808763941565287	0.809217492206552	0.786423941918553	0.803794228395223	0.800869020495807	0.806749330032805	0.790097253915509	0.784748291833522	0.79777512675754	0.799799633954638	0.796975396521827	0.797959577095074	0.802269331515097	0.798317414884745	0.797538339913374	0.799442836096086	0.808289558436109	0.812617414884201	0.795177600060051	0.814649062103868	0.803187187011105	0.793309061844318	0.798453630465215	0.794990946328479	0.804142337128142	0.796773341675673	0.806000372580142	0.793777037590517	0.81387438665962	0.813934484268883	0.813662182818137	0.804423125894103	0.81791821549191	0.81026185463484
0.796769273782487	0.806957088278467	0.791022326223802	0.794663910414015	0.798513904128434	0.793750538909231	0.807756665950744	0.823306514852518	0.800501981085211	0.804758599084147	0.803086380459702	0.799685795070209	0.798062713477098	0.80934034892778	0.795860577907066	0.800906104813825	0.804258604668072	0.814299494610625	0.798006715306739	0.823112393161415	0.812224957070906	0.799183602926183	0.797195857993803	0.814675636322418	0.808233256276059	0.813896357890431	0.810122653285002	0.807431282344468	0.807966893577682	0.800670744002699	0.817203293544349	0.809655441939745	0.815003394383949	0.793975334544777	0.797458824370325	0.790961630015644	0.800097198695456	0.811456756963407	0.798053263593522	0.793940653440967	0.80312801116523	0.815244513981687	0.816365004192651	0.818136333607646	0.813381258743457	0.814692148143238	0.793654414257182	0.811594693048483	0.802173282080621	0.808458226474216
0.800238300467745	0.80861647820363	0.804966319481243	0.799384742902518	0.802778467656251	0.789166919549775	0.787988430889049	0.800237090682327	0.811708252222865	0.797325769050067	0.814560424765972	0.804344266564642	0.7976154028183	0.823654203467699	0.8137013449932	0.80477084183764	0.816290913642018	0.802187053432964	0.8112090507606	0.792433231991069	0.797575588503262	0.806027650732854	0.805990032907624	0.799849153948564	0.815560062275476	0.803831586373597	0.80320366623668	0.804725492617189	0.833706506764333	0.779106672931199	0.803191488511877	0.799802704601519	0.814505344275438	0.80112172351015	0.804160413286622	0.809457111725487	0.787294123462907	0.792307948400985	0.809141040869267	0.797681635185164	0.796457642595935	0.814406614641984	0.820293596359145	0.809664930417404	0.793789847129917	0.794394034628767	0.81618242458755	0.808212649790543	0.804704510897354	0.807524531812661
0.795690244224115	0.792785003162117	0.797999081949423	0.806996395836994	0.787046202325205	0.807206939312793	0.801247840940153	0.796322440130066	0.784355289485784	0.79523141468956	0.809614108732094	0.800641930915024	0.788956148960152	0.808797965762397	0.787732350754225	0.807480464851454	0.808565486242817	0.811969399312039	0.808014911580342	0.816197770164808	0.814006365834977	0.803526360080321	0.797201262051358	0.796448315992889	0.81532030955151	0.807826179318868	0.813789132502883	0.817615877919516	0.804319503417938	0.794634970232962	0.800988352321661	0.823811292451243	0.80909903840089	0.805306870197017	0.789411367758024	0.805381884856499	0.815405178358602	0.812459766665449	0.815316470376056	0.80234639990268	0.820934813417078	0.794833511731702	0.802615880739677	0.80137126365204	0.816032114825404	0.803899091187011	0.807181604026046	0.806285677056587	0.804862414276493	0.813609769977784
0.79706774960876	0.813419587991029	0.800347667655397	0.820122337310229	0.804191525068649	0.80228885902962	0.794545462939831	0.812064159550457	0.795633882894983	0.786904086247352	0.78659440170626	0.811213834151563	0.812719669186215	0.797846295637392	0.802124878136946	0.809677253872191	0.826081378871262	0.813691025960839	0.802019172508752	0.80624765514244	0.808353629536583	0.813107258640718	0.784658942020277	0.813873986550323	0.813065415040011	0.791948974280345	0.799086630619745	0.793880900711497	0.794595808690072	0.808325633930108	0.805612724708262	0.801734486325796	0.812624779204577	0.810206168083845	0.806750929948915	0.789100894120244	0.803397452388641	0.807168701942201	0.79006852175156	0.800631255783961	0.80031919163929	0.799896219960253	0.805158165157014	0.805701374869075	0.820408074021327	0.796867210773578	0.779078654323046	0.799242174934772	0.807555588730916	0.796837069568432
0.80993295026631	0.801206892112746	0.804098648863858	0.816292455420894	0.823046619075238	0.805602443131545	0.822148177058612	0.792033371875225	0.795179752496366	0.80450320309714	0.824016725436929	0.808041981316171	0.803263969213135	0.818468664704148	0.817583440463659	0.810176080203051	0.817293086789069	0.797767297018795	0.802504551602312	0.810164779450061	0.811000663772081	0.812900880591686	0.817494760187566	0.795054381903334	0.794660432105748	0.812961214135979	0.815382982670338	0.814215019594985	0.82030656791102	0.800420451577798	0.799002993256721	0.824730267874188	0.814504647952702	0.815935051573255	0.797299835568038	0.804141088510133	0.800653516005559	0.794826514994172	0.795327820354305	0.817258644177974	0.804617915550444	0.805752785754754	0.812258586040394	0.801760783467021	0.796321187178888	0.801028311011316	0.805780299067146	0.804183806122569	0.797512845997316	0.787387532358956
0.810590110741596	0.800590130022641	0.783497395817731	0.815589116797483	0.801441718631152	0.801077016910672	0.799649706362034	0.801763773187153	0.800377336982454	0.799550881300454	0.809663959460545	0.791897334919161	0.802646252733536	0.798407321954781	0.791959895213103	0.817740292979792	0.811934285460995	0.802250209815625	0.808134568695443	0.821229532985231	0.810497638756725	0.800097508027799	0.804403688612662	0.80129712695158	0.808754554366894	0.811634513872293	0.8039523507983	0.808539964778101	0.804988227839243	0.78062032572604	0.803763048966762	0.810136759691779	0.813536077755099	0.788423611233882	0.807930930909353	0.811642651903725	0.810362554547077	0.807047195349212	0.808330697338923	0.808093461068376	0.811472516162366	0.805400769617657	0.796295964774897	0.822099557557088	0.817497550938678	0.81726136487245	0.813400619888281	0.797546747125994	0.791864965373294	0.818797405784593
0.802254246824697	0.808718544558465	0.796192411003631	0.802286096123131	0.804780776864542	0.798801824011786	0.816335833446919	0.795904058273735	0.809765725887865	0.786262422435963	0.7984369305368	0.795741540531774	0.793459543952141	0.802528816899638	0.798907250080932	0.811899533388539	0.808158627200867	0.811367664729974	0.800467673862916	0.809882017761235	0.806991602613502	0.80251564924418	0.799900278608949	0.809992087896415	0.790011510050287	0.798770610336747	0.805503483423156	0.809612170453606	0.801981358541104	0.800429140127183	0.797145699771112	0.809912477530147	0.812041755958402	0.807949817970368	0.834051013849284	0.812039363732718	0.809257554039776	0.795818722315535	0.800958109794636	0.78296136890863	0.811727202323003	0.803706439321412	0.812270408154538	0.80409377957134	0.814634905110289	0.819450493381127	0.798212389578504	0.799646038051065	0.824420574657472	0.805229026563123
0.805460170128283	0.794022035671398	0.80002105851993	0.813683729529163	0.797775509246748	0.785963169772336	0.804923588477661	0.797773996393274	0.804983194490525	0.806726898263765	0.801195484133669	0.813128757629909	0.812998867225991	0.824023320312846	0.79139622994803	0.803083105154741	0.79741559286803	0.802095420019255	0.793089539383836	0.80776628854926	0.796375401942047	0.806076144248018	0.796817316709648	0.812727373962242	0.811035872810015	0.809180229326289	0.795114502216969	0.801530670428947	0.80431976846549	0.802117249388393	0.801387005350806	0.801129364911304	0.7948642589544	0.809229714193615	0.798793192467007	0.79683469533508	0.80580427168796	0.800161065965459	0.810333497534027	0.804998990309827	0.807946178282284	0.802588857019669	0.805935435491633	0.805668223532133	0.816567225374437	0.802451263894321	0.804280598115139	0.799900468946087	0.807978822558926	0.799315487167995
0.793860936116924	0.806795230741634	0.813297745308148	0.818877591306938	0.796706264901254	0.796461365911449	0.789962433900421	0.810993545600074	0.809144457297093	0.801503635072341	0.801762920965515	0.821132896414653	0.803328549940935	0.798230323060184	0.799342248573659	0.816756809214543	0.806540159627442	0.806500077045126	0.79221333740807	0.804509527375163	0.80344896069446	0.798903240744037	0.806902643599097	0.809808147465389	0.803930732195363	0.795760943307943	0.821349957915963	0.81522465929568	0.805403320666237	0.808553784498175	0.791113197038453	0.808555776506099	0.803020150286583	0.8087370100726	0.805109105853618	0.813883411509951	0.815592771464407	0.816215718517944	0.820264960029112	0.791655265375319	0.806028761591736	0.796437872501369	0.815335449390324	0.787960244264249	0.794462881240076	0.814006204421369	0.802870651342161	0.826686738317803	0.801409433851562	0.797344821798679
0.80904064783812	0.786157714961044	0.806607528411109	0.791080675244126	0.809837327230718	0.8070455853227	0.812830807812474	0.806379817590189	0.787461059999104	0.82497742094566	0.81332872936651	0.800289121339837	0.799691440617827	0.798912683763603	0.813402224851238	0.801293131827643	0.807525659220753	0.819840245654027	0.817260275480666	0.789316087164833	0.809923672597658	0.806358358212233	0.810632877024534	0.803597289452487	0.794847489205675	0.804247291861759	0.800246520776859	0.812842163683016	0.777898166388676	0.803531209676198	0.792373720677599	0.804718947295301	0.800256833681164	0.813932966222087	0.806609112550672	0.809767338612872	0.799846610852382	0.803163034824586	0.795559007317636	0.799432506281214	0.812421030439921	0.809405533424635	0.812491348621404	0.806802170335346	0.826694285790161	0.812406800875437	0.804666664759804	0.788784260348889	0.808889929242156	0.809910202192469
0.796309680390169	0.794505406394064	0.793928199518957	0.795852235395206	0.811607155105482	0.808584693634954	0.800181228062606	0.807506692061611	0.797380035418378	0.813031796783778	0.807964550674733	0.813890546555852	0.805908951908556	0.817534046074433	0.795972872224545	0.803871429302017	0.816528127105016	0.803347779054381	0.799918772470508	0.796063497178419	0.801001202065166	0.800804790187336	0.80566446404518	0.791595628657602	0.820457715957449	0.802955800617202	0.805431118809046	0.782906417187746	0.802806954709067	0.798754365949518	0.795129191078562	0.787945349998888	0.805026347905935	0.808244214268865	0.818122949097491	0.795783532478015	0.80896401416486	0.802348053062272	0.814535783634974	0.809387754825557	0.807225583694204	0.807408620882091	0.813068126614166	0.801778404311869	0.792079868341511	0.811665098829155	0.794889831992535	0.81216519212532	0.802800662369133	0.80360537508575
0.810850471600518	0.803308598359297	0.795000945415209	0.808575334813543	0.795383935170059	0.812598981581338	0.782460904782582	0.816738016957659	0.810420184175588	0.809001775652136	0.798646250352742	0.788322327538654	0.808635096029813	0.807467728974924	0.815593084538103	0.818116777390622	0.800034990727362	0.794720630897929	0.804037300238089	0.818624040944379	0.793783201313098	0.828697777397342	0.800219297568909	0.805535511578217	0.810771938876597	0.809036614932883	0.805305805555476	0.79843176937548	0.810094407326942	0.80254126900453	0.790963524232755	0.806132687934683	0.818585673975006	0.810457911741636	0.782178161258212	0.806980497841995	0.795440630061008	0.804898760529737	0.799959999134054	0.826080317323187	0.805295561247993	0.788172582909304	0.813928316835998	0.809050373855925	0.798493117797282	0.805744590742004	0.800448168357769	0.799972064904869	0.813767113912162	0.80563669705765
0.803173562402203	0.814051596222581	0.809530369499288	0.804004397988459	0.809339225987458	0.824702465682287	0.808009365473956	0.803134148321235	0.801049390029634	0.807888896087196	0.806263298067176	0.815731549161891	0.799370651280356	0.791947643528576	0.817948743616834	0.825509686509602	0.806532261222426	0.80532909386596	0.800313757601344	0.795539970625373	0.799842158477929	0.80590716548228	0.801762570552969	0.808097446036729	0.791211557519939	0.816525674044121	0.788647915458738	0.798603730519703	0.800993579870966	0.811413671441203	0.805492487967579	0.813581150818679	0.807851197199236	0.812836628237854	0.788789241069122	0.807702819581068	0.799383652467139	0.811579979290589	0.808626551243183	0.800684908049982	0.797484375751216	0.817375601751696	0.800812999260918	0.794447815662351	0.805700692611472	0.803562853420054	0.781744381709156	0.811511792044125	0.81549581541566	0.814093921904129
0.822935108308402	0.794525696676037	0.813319390127801	0.80431179184992	0.79990273073606	0.807964439767067	0.805710652435785	0.806283734791055	0.805600441588614	0.804084962963074	0.799753691000187	0.814021778392753	0.786220897349459	0.801583281826084	0.800218911574332	0.809083932971951	0.803544259432009	0.803500643845021	0.798729148869902	0.808903029682862	0.812008338436344	0.808663045701067	0.807679824877529	0.808792894743449	0.809773406184588	0.794645583885933	0.812397357311271	0.802099045931105	0.807769595309027	0.807609037650577	0.811220966479924	0.791513488245511	0.801352021339284	0.803328079693752	0.803495142148245	0.808927789846181	0.812047646213136	0.801055765174401	0.803591986560855	0.795192739203509	0.7994734184598	0.804860809550614	0.80461708518752	0.817139040020341	0.782045174447142	0.792676367570048	0.808306800688671	0.799745377209248	0.80329145138904	0.795900577637222
0.805563405407122	0.812900151897822	0.810368062183376	0.79858868256211	0.814596541092175	0.810112340037287	0.80532807755702	0.813940142038963	0.804186018649787	0.798951799476503	0.8011646815623	0.808515540561656	0.798497007908503	0.804674472083037	0.799075536076694	0.807784188010184	0.791758862643869	0.812531557026635	0.809383305241731	0.807726759294202	0.81746276473963	0.807697135444169	0.810544046524227	0.797934172845174	0.800300478107829	0.812921700814014	0.805868742539158	0.796139907111917	0.79387888637004	0.787420804525018	0.804695538713873	0.813067865703676	0.812086619526146	0.790000691104742	0.80402889921936	0.797438353524119	0.794635613116123	0.813544274409087	0.813904172327005	0.798583729016452	0.809920876968226	0.810497100352399	0.818640906972826	0.798088858438886	0.798875384240481	0.805133165931337	0.812410156327555	0.803954451889357	0.796450731310634	0.785357429185835
0.797757663049501	0.796948709073211	0.796656987712228	0.814883706360804	0.805162093003557	0.798854833293017	0.804701627539786	0.816263957849228	0.80296283964455	0.807461131375129	0.819833173548452	0.801392643796917	0.805177830600441	0.812725922143425	0.807972749514348	0.799800472298241	0.805798792280946	0.795193369755866	0.805748510925063	0.794954444972814	0.800416443210318	0.815459648372552	0.808903209605356	0.798561161682781	0.799468220723889	0.812587521466517	0.802563322667578	0.794787419792632	0.806852576455554	0.810242429916227	0.804909759897261	0.797738322211329	0.789637619533149	0.803184572430634	0.813108642298778	0.793653402320152	0.811287039218297	0.806214325661835	0.807306562662921	0.797132401911811	0.794217627644986	0.790482835196016	0.793944979857192	0.792799074725914	0.793895996053214	0.782203065521739	0.792009121967329	0.799987313790547	0.807315188334299	0.820692057612093
0.811299473530521	0.808143195960303	0.805721648701602	0.81428447899604	0.798440637594532	0.807081593508958	0.792533431258011	0.811509433005825	0.803627327715126	0.804330617170827	0.808682979550286	0.804455182184561	0.795298321096438	0.814456016943574	0.803440087996892	0.798760129609939	0.810337144207116	0.799985861351681	0.804626848895325	0.81530761574167	0.789329546025981	0.811115232860809	0.792451006963628	0.802882697105982	0.796846475014821	0.819625076986742	0.803255908137081	0.794535194198337	0.795902076126996	0.782860073807977	0.795329354973378	0.806212051549875	0.802533101085396	0.806195635784634	0.80219697953518	0.816160771901918	0.794086392306855	0.796927512238471	0.804947613103348	0.802248615479857	0.800219933107176	0.789921461418093	0.784577797639857	0.804369329545782	0.811324465637051	0.804120263618704	0.814823618738189	0.817815128922315	0.812976034716149	0.799460862548324
0.810712451168956	0.787765700016372	0.796165905449069	0.815062511757073	0.810085014776527	0.784167451798812	0.812761899667769	0.803999648436224	0.795961184776557	0.807032585546375	0.799934901808883	0.795341271620856	0.805805850782638	0.799736193013297	0.80166220083806	0.798913569114514	0.796577669227856	0.802161230159915	0.807119162851992	0.792771488821202	0.791722525487129	0.806099554788358	0.810462085796283	0.822346574533006	0.794662309736035	0.803565945680436	0.796674424253677	0.796482049875308	0.811549169193895	0.791621094169846	0.794789851916509	0.803426129934563	0.808251180703017	0.792329279301526	0.808950207285968	0.810527490055731	0.78877122434681	0.808883268386985	0.813305068150988	0.811370628842044	0.795573752848243	0.808157900233735	0.796267797588936	0.803310085664103	0.786895573125538	0.813208670052102	0.79661151530874	0.807146282754536	0.813785072696598	0.804027422488792
0.794046486598989	0.796154932433229	0.7940180192994	0.798789158001427	0.80853158958216	0.813382316961695	0.78788367510057	0.803727753181237	0.792269830197762	0.803241426115611	0.801933123983358	0.808787068236048	0.791934524536434	0.804097147057286	0.797868026862198	0.813792923755575	0.803941791566053	0.802605950632456	0.80332085693009	0.796385479372363	0.804127034716496	0.784437828660115	0.815690233725771	0.808105395622611	0.786694996561962	0.802332441946137	0.793065709823663	0.797041304000894	0.804775152391614	0.81433576710954	0.797886073596753	0.809195086616922	0.796521503271693	0.808883652002372	0.811431469669014	0.803257710536052	0.794659429446744	0.793816547340865	0.817655695002932	0.815472725104864	0.807734519515954	0.801926050166136	0.795973665087004	0.796403672453937	0.80346339648132	0.808854290070909	0.805207865850137	0.801913389781969	0.810493973923283	0.804905845826684
0.797970733688837	0.806085071506358	0.807687669504491	0.809938819510629	0.793081576511551	0.788624569043352	0.816128604323383	0.814606354587542	0.812838827992361	0.795802967432114	0.79678759665902	0.792598576843794	0.790768165785737	0.797883448592756	0.814087397724308	0.815501965458836	0.802113773204542	0.79508193278654	0.808891110871963	0.794372269915566	0.803367469159054	0.796763449221952	0.801325931643644	0.81044960879964	0.784871875705832	0.793378175716454	0.820480122980221	0.811758505155784	0.803848268440236	0.799085468992766	0.80365987932585	0.799608164367433	0.802059333454771	0.792905229471672	0.805265339454683	0.801022134136328	0.800354388767294	0.786190972490395	0.806006013471401	0.802875221915394	0.812115886796491	0.800651470999561	0.819103573350152	0.802150565713389	0.793642824445014	0.806118618130594	0.80766479281453	0.80691701935161	0.800393447264234	0.787710873362985
0.790899904786127	0.809448912348323	0.789674315925452	0.787213326208137	0.801040493960842	0.791252001510864	0.801228461139019	0.801975861275986	0.797600049396032	0.799596047363406	0.794836637148114	0.800984582298686	0.792747589921149	0.811806692818305	0.807451910316302	0.819109504890919	0.809686786911946	0.794880880165626	0.811878823613021	0.813359576275443	0.805478153906371	0.788132267961618	0.80369428383458	0.791641282549981	0.805930141724977	0.809569972868624	0.798904531922224	0.81873446172925	0.79892273140185	0.806444743625344	0.804774568566076	0.800491977337642	0.7962067011546	0.793681633709515	0.801239108775185	0.806409978774313	0.812857635151506	0.802392421671639	0.807564312130512	0.814765331212059	0.792202639852151	0.797274947499369	0.812615664259612	0.816031885297789	0.805914362501199	0.790348650484325	0.784419995535717	0.80547654587082	0.80310376361957	0.810293182931151
0.786163695552349	0.804944052656961	0.80299774397394	0.794993458212375	0.795127670584123	0.799008369428758	0.812050643097311	0.806057111279908	0.78318570214745	0.79197339048704	0.790667473053997	0.813792183010325	0.792287461391776	0.797539200139406	0.803453816297892	0.793683020244914	0.798645595100957	0.788711973804329	0.809054619839365	0.793199179010762	0.814292442612795	0.803135331933603	0.813575560125127	0.802709344858847	0.779851336797781	0.788125532488351	0.796875350674742	0.808534882124818	0.80767212396229	0.788334425209297	0.798979234859438	0.784795958567739	0.803047881624866	0.795399975989971	0.805827367323263	0.79737961699958	0.808313859304227	0.800383771519407	0.810101663197143	0.809731414714605	0.796949257125459	0.825283939787072	0.803782635967627	0.796538829802604	0.801595776266114	0.794080262591386	0.817171713506889	0.801346239363971	0.812500747530965	0.793165314109238
0.795228542102994	0.797273293177565	0.800008824186497	0.807362970273851	0.780352930922403	0.806548687649281	0.798128449158399	0.804764987760615	0.794469098325176	0.785631673592593	0.809577765919312	0.816564251376353	0.786635870861865	0.803476196620517	0.795550785833909	0.7992582769697	0.78925116501098	0.809718362039131	0.799545291574778	0.797624371840716	0.821241831849989	0.784318348101861	0.795991613313287	0.791754136974905	0.797549492270625	0.796090921919783	0.803030527584687	0.805601793807349	0.796316609759615	0.800215205931243	0.803432849503345	0.804926102986809	0.81391998356626	0.80217863137167	0.813060883465074	0.812069192542471	0.795145553671241	0.796049267774704	0.791296814505346	0.802302041721335	0.791380519300865	0.792671781975181	0.791965901317078	0.8051521349705	0.795212323003272	0.804678520076647	0.790769765152132	0.798025209286118	0.80361934107029	0.803599435750303
0.79669782348577	0.794301905852369	0.790492930323583	0.784475550093071	0.794648551009604	0.799427947760031	0.807515299118915	0.810087356690066	0.792045614116983	0.785819010160818	0.78837178218577	0.810794599083348	0.805788531580348	0.799694727621598	0.807057207359819	0.809862731502898	0.80081171756802	0.790678460505505	0.795168466563498	0.809041354885972	0.799346386636801	0.806773480784364	0.785336940138104	0.794134725954017	0.808877841771984	0.807173746187793	0.807341501956536	0.794869158145836	0.798750214493	0.805531571131235	0.799643924275849	0.820652833894264	0.799658962479091	0.811557446945407	0.809319520599924	0.79322954624636	0.799357497260125	0.805453107494471	0.800784092695519	0.80762963863863	0.797490272936066	0.813699099403985	0.801832280647048	0.798603142479168	0.80288730263056	0.795880320748123	0.821976974407112	0.80275966755655	0.793612107501142	0.781814278392243
0.808854992675626	0.812225166557013	0.800163662595883	0.784499704812867	0.794211017173065	0.796619564981984	0.800518302759886	0.811675356970401	0.792681037511266	0.787923200729947	0.798108785534225	0.805681626806654	0.794161078099659	0.8182586665408	0.798484121129658	0.812776080659417	0.809754961425504	0.788925473129217	0.796974860049215	0.796972123593865	0.814193154057158	0.821040534670656	0.805250058814583	0.809191716700719	0.787492776231056	0.791627405910822	0.80930006548208	0.80482512772581	0.788317675405596	0.795657213869363	0.808638950818025	0.799536670412341	0.789520535894572	0.793266031960637	0.795342260421409	0.796006378644419	0.793172504197993	0.807167937686713	0.810202566895597	0.795981049540321	0.810821244962861	0.812973477302859	0.800013300687061	0.801651171557193	0.78782825624497	0.781141755826263	0.804523371723205	0.810431195894551	0.814979572387471	0.79179333511958
0.807080730847099	0.804866211361152	0.803637989082933	0.79667669628116	0.804383435262724	0.795958707887885	0.799281881238017	0.7915843552195	0.79032158190013	0.798274735717462	0.780383130806039	0.809690067906822	0.806541140319015	0.799246330078556	0.807091990058969	0.802584735724663	0.781290871536125	0.802813620948155	0.816412428839437	0.817461640817723	0.810037472787311	0.79804334188821	0.811068080046246	0.799436760066735	0.803426475918434	0.806903759623101	0.814104699326491	0.802635586396008	0.800322539631235	0.797170812544217	0.80376957171092	0.818540416324642	0.804385970991556	0.816460820868578	0.81838346750144	0.799447238546994	0.808521787180411	0.800349286808527	0.804729074258071	0.801882339110066	0.80603387624428	0.805273766963257	0.809890038568911	0.793293748454653	0.807780866105504	0.798380838778804	0.796320611679049	0.803365793044648	0.807971583109794	0.791756863433926
0.793387439559522	0.815191694684581	0.807001091639873	0.810071495410021	0.808952237032832	0.804138591110357	0.795527841198677	0.805459549054963	0.801340526757108	0.803044319703807	0.799622392515523	0.804036480325505	0.805379430139743	0.797820440303294	0.793718400625523	0.807063174605927	0.794926435591437	0.801753572664195	0.812598886994786	0.798506896169048	0.797694479825958	0.798539175720194	0.795226438214008	0.79209735420406	0.803541467778861	0.802711070116583	0.815545740831761	0.807450115987495	0.809632384275692	0.811627424674437	0.786623783855165	0.819105442679152	0.807295561500548	0.785897560109828	0.802350327442925	0.798639025978571	0.800394777523926	0.810194808823506	0.819410090480338	0.800348905371766	0.804757873445074	0.797525437237799	0.803305634196185	0.805750397801243	0.793732221180118	0.806619663339343	0.78790404103113	0.786748301931323	0.807202611328657	0.794370583248629
0.800346570191976	0.808682301752947	0.82109693028979	0.794851410249099	0.812769776202976	0.794832366915662	0.78820732745458	0.80873254308195	0.808257346838305	0.795596408534838	0.810103281132824	0.798459156550857	0.784873520238173	0.797780904754695	0.786436181672859	0.810098332745612	0.808915691583172	0.796025702768237	0.790094051108016	0.799802426793648	0.800195943845516	0.791164531742687	0.79040108886368	0.809487845139898	0.807529465761248	0.803370505253355	0.810318976828217	0.802345980205939	0.800872111859492	0.794928477121278	0.808256941094816	0.807671843347194	0.801850930085954	0.792111012871705	0.786954808699852	0.815135858103466	0.791871368726568	0.801905022501342	0.803929419830892	0.791865621879243	0.804341634438269	0.799145650240462	0.793875088689219	0.803002054027292	0.803918868491493	0.787143254324042	0.8024455453783	0.801388068094284	0.82128282961494	0.794452267573838
0.814112105236246	0.802809116549247	0.797973352127961	0.800835563453978	0.814103949039081	0.797808170652492	0.805449711703124	0.798700047390818	0.802208505345745	0.801066062633411	0.792492072171456	0.814832946766438	0.796014113116207	0.789804010917175	0.802229158820702	0.797988426086637	0.806743803578477	0.795055198620987	0.78619180223234	0.794292476868304	0.802779294967405	0.798545107153197	0.795213932097343	0.795584383753948	0.806771148103944	0.796780682952217	0.814132722839045	0.793209074179731	0.804804842227532	0.791598002774669	0.82050743485992	0.796889979720241	0.803423752399752	0.807347626925052	0.802561013564437	0.805979996341785	0.798744385877639	0.805237597114571	0.810581494117425	0.799506228911616	0.783087781272318	0.800011942189143	0.800773366993972	0.799061519923723	0.80402458223241	0.805927637312478	0.788407124742015	0.804438729668221	0.814780703021603	0.793001932325545
0.791534688755685	0.807974510908803	0.810835328545523	0.790088951971296	0.797546823467252	0.804193392286012	0.799907255692824	0.808191215966705	0.783457209487177	0.793025714086523	0.80268633581887	0.78660023171362	0.806536000223459	0.807650514600008	0.810250704832633	0.793763215912026	0.815638566250347	0.796138114497343	0.795054518124024	0.802841144919854	0.792262887006956	0.806206225609091	0.80915678441261	0.801434686124794	0.790204614722012	0.795861027213964	0.806686227523852	0.798874922758763	0.814329857954329	0.799390374832407	0.813051840200206	0.804495811396579	0.798039821413731	0.790086878221615	0.793675303624259	0.814865870365939	0.795228974197338	0.800418232536633	0.809121568569149	0.792680989212046	0.791287570832806	0.804432311084376	0.798147836473339	0.803631516413603	0.806167629601131	0.811559804466783	0.789528890762917	0.810913515769699	0.818876235850354	0.796424861319255
0.803716193240276	0.813439493565263	0.795744274780991	0.801969322062603	0.796582542306828	0.797779395431635	0.801320415804751	0.790075437186576	0.806719710262094	0.793515688679171	0.799370992151917	0.790796989567495	0.807620815713601	0.793118861544728	0.793610917590318	0.805318614969678	0.790990015034807	0.802560023165111	0.800406859550305	0.804789050307155	0.788432997839202	0.798536348968411	0.791500718104132	0.799726546935261	0.810017566898567	0.804762201363578	0.806111479815353	0.796447894315487	0.802309911044127	0.817215264624235	0.796241716572671	0.807540685567753	0.804314834565525	0.79755699024031	0.81315038842775	0.805792491211136	0.799378158197921	0.804014135056	0.806693780936823	0.799142454168951	0.804956328898049	0.809140500475149	0.786907520691767	0.795287657988911	0.79561657449274	0.810530254949789	0.802635630715735	0.792541466789411	0.802183460393939	0.805226414231101
0.79487021938142	0.797039843532786	0.800014294000787	0.813334245105414	0.799185633039326	0.785962432813695	0.80005987993909	0.795415116510252	0.787506969958644	0.790978853763829	0.783598403568209	0.809718884687492	0.783657077890245	0.805429733670783	0.802403153869336	0.80850277072496	0.782768212521678	0.812517428757394	0.784277365015671	0.801431048839491	0.80356408218606	0.797869077397036	0.78798521138884	0.78922013848492	0.806543755800411	0.793733959791891	0.797686067746801	0.803838110354438	0.798447740964856	0.802258859132677	0.795347092163347	0.787375605580848	0.812039767133612	0.800538827483789	0.802348581597678	0.802196090458484	0.804321532304021	0.799023988088767	0.80227202494114	0.797729027046659	0.813932156205499	0.796886371044577	0.811527012753424	0.80699111037609	0.806548980896086	0.794857086312202	0.79517422064223	0.808859111943018	0.816790635916241	0.794938485345912
0.814812935719257	0.790126610522217	0.805688428429044	0.802977448765571	0.796365559950654	0.817123741484624	0.794485505730817	0.785362159496156	0.804923703193132	0.795608644855322	0.800611803676901	0.803216490844344	0.789982494248702	0.794276803871975	0.812523704826629	0.796865916302449	0.786221004760481	0.791684098403486	0.805219951681103	0.806535528628779	0.792774083521737	0.786600864865913	0.795479919313652	0.810391471317291	0.807005210171892	0.796883079495879	0.800642723424373	0.803836837838764	0.803204618928349	0.798623990357404	0.809384145944307	0.80401817810752	0.793652725949931	0.792495928769955	0.800307676285302	0.808257597900466	0.801825170627902	0.811577229502673	0.801962149069733	0.789849887561122	0.802489080778863	0.801974728421153	0.815662416513412	0.78695285979497	0.806050084007468	0.790581865534879	0.791516241489287	0.814549012219958	0.802604823961952	0.806591094557979
0.785648871327766	0.793775841429923	0.807923106557229	0.798892673057057	0.805891030697513	0.810569639999912	0.79833968108262	0.808385751920458	0.805209358797475	0.807447938284104	0.798791828155236	0.79011779013749	0.808220097077449	0.79231126882079	0.797166911836162	0.797182442985269	0.797074359629749	0.789776809036766	0.804922960996149	0.796778579577373	0.792651073791688	0.789514581997982	0.784383965954716	0.802582502761711	0.795390597667835	0.797482116664973	0.7927301298588	0.790215796584835	0.785172158054856	0.806973595469364	0.798394480706327	0.792276644935647	0.805217240412587	0.807832840053377	0.797881849638482	0.804266398205765	0.78944336650041	0.813989029004652	0.803341961536474	0.7986654900384	0.789876274976469	0.799098592609047	0.82015454782581	0.80484906437998	0.778135302591	0.796015628144288	0.795154724347329	0.818306379048948	0.805681563006244	0.797813871805617
0.808806239237885	0.792253527057897	0.795636344895607	0.820468812181497	0.805746328024416	0.794786907815507	0.805072067380756	0.801426188807217	0.783905854233785	0.804619305242965	0.794634595925166	0.799245097323903	0.812120888062212	0.79859719361656	0.788445758743468	0.792344264040696	0.80401559994358	0.792224646359232	0.794344546066469	0.813998867856213	0.799526841557978	0.788611318858067	0.804958163588372	0.797820190637016	0.794356363896282	0.787557163461934	0.794333296078624	0.802998170148572	0.814481172447454	0.800308332511496	0.797514887538719	0.797316941307343	0.809177508748183	0.784314632529216	0.815197726748027	0.796502786018234	0.799234248073137	0.801496508458607	0.807597159822026	0.79827093724596	0.792787231109146	0.789485285841053	0.810088734357317	0.809770329165457	0.779609965800837	0.780046297613252	0.797839597563581	0.79859234523138	0.795197872297405	0.795426222955487
0.789185903363293	0.795338735193492	0.805985308301195	0.811688002401036	0.790267724816958	0.803400215374216	0.803112169444057	0.798838354532224	0.806618792320613	0.795682650633853	0.793434206328103	0.784308435992318	0.799601384540689	0.788574481873463	0.805024393138594	0.804980629840751	0.812072414657148	0.801974165045717	0.803710541180507	0.79267997997755	0.786943527854285	0.807935540762795	0.810443712648822	0.807272566266801	0.803058486716835	0.791887902836244	0.801068765314248	0.809556226008309	0.795800246797743	0.810924223354664	0.784019740216414	0.784692071255308	0.799549680436784	0.795464887172139	0.811317006797776	0.795535603908178	0.797026333473102	0.787999058441606	0.792244236404559	0.79591786495833	0.806099339028774	0.796105764034055	0.791819302158269	0.800524547036728	0.789460390422079	0.807118625781276	0.809899119064241	0.794279629314548	0.803935898423904	0.785283138948854
0.799416536756915	0.798703170269134	0.801181212229258	0.802617775826003	0.791579271125286	0.782230618296482	0.787533796907593	0.78973230079654	0.796674415799346	0.790608651201183	0.802037860001918	0.812603475192971	0.798607428018803	0.797065446987827	0.807078991479007	0.806232473070715	0.801307109405084	0.791340392193607	0.790147890498978	0.810668726521206	0.79952211184976	0.794076015664985	0.803149364110673	0.810744877857089	0.795460254956027	0.811365180495428	0.792682148467811	0.803084832752068	0.803972881018512	0.796010957130255	0.799558067961459	0.783565213265039	0.789772694704978	0.804556669171939	0.791972846742408	0.800589813910102	0.804394034290586	0.808210069606886	0.797819183442454	0.790931960658395	0.792241146812772	0.803423564768197	0.800370040825278	0.814151880528136	0.794649708349091	0.802962420495682	0.795816971899733	0.79304902415673	0.798333421188862	0.804899435620164
0.794422376882123	0.812680228487176	0.800876434235502	0.807927033648687	0.814198283012191	0.78693115186734	0.790749522364914	0.801289212828981	0.780481727049159	0.786611544357135	0.791072688024171	0.797583748560048	0.780579163271283	0.798985249938752	0.798050233032366	0.795208866126016	0.809522517586418	0.791941886357594	0.790705760200291	0.798781992658996	0.794910592428267	0.790683148660081	0.797002263727902	0.808547239472992	0.799861916111317	0.807155877442764	0.781408691686431	0.808866202496631	0.783378755797152	0.800217652629221	0.800041505142865	0.78586802101037	0.80916812787261	0.81450411646053	0.806634337008668	0.805845390728727	0.813378427286144	0.794043725419876	0.806248614143418	0.791218528223839	0.810953765488213	0.79453482729985	0.810661062277474	0.787024141294737	0.798055377286023	0.795825125927302	0.807383931951834	0.792666066487316	0.795708423916708	0.795662093670137
0.783102206602227	0.795516812775113	0.795064482239682	0.805267852932871	0.801235274771205	0.792804980584056	0.796748156719361	0.782873028523323	0.786164389145956	0.796790089575525	0.801922923518624	0.802151478087539	0.787507400725967	0.811538421991726	0.788268061197468	0.792063452595778	0.799607295009649	0.801577147705702	0.795548552622864	0.811521471126046	0.81373637072155	0.792883549451355	0.795121016741012	0.782862190990966	0.79514017391755	0.820921597146764	0.803873019417874	0.816151793435219	0.813408168389477	0.804741657027809	0.794074884545192	0.799967928086932	0.797456175877087	0.798862623302102	0.799013682831127	0.798592133724688	0.799000542401886	0.787463812867665	0.800846804870824	0.795751684688938	0.799268518674779	0.80636696301151	0.788081138882059	0.797762496278764	0.799724200352888	0.79866283305802	0.804541766691091	0.801082473760132	0.798912653625026	0.810600620924096
0.800170013847409	0.787975603272398	0.797781997310767	0.798542609483286	0.795278203038203	0.806756264869084	0.804330517516174	0.783653414559012	0.789588564430595	0.800686224303918	0.817281861716842	0.802200249980661	0.788614220296175	0.807183806154916	0.819747987572667	0.777161485300674	0.815204394114661	0.806887254024711	0.803427450770221	0.798238801422839	0.817359019220603	0.788578532313722	0.799134477471099	0.791654448747058	0.793770862488636	0.80132520890202	0.789368196492431	0.805668375777989	0.795537101438284	0.80862180841649	0.796492623805551	0.802491045517318	0.798484787071529	0.794579190489852	0.807967097743694	0.802210439559201	0.796116775480556	0.790309963418987	0.791794356040329	0.789384295738061	0.799467241834278	0.798944849418499	0.807118498832225	0.777750204343469	0.810403146502082	0.810781206112221	0.80389732351734	0.795966630339914	0.807963223376135	0.798985022684773
0.790170198802274	0.786466896945254	0.793010808131596	0.794436076451558	0.800146381535508	0.796346750393911	0.786551470650538	0.808914818828679	0.803807513387023	0.792057630850402	0.797081274601459	0.808456974171013	0.786172603267124	0.793992600129382	0.811588428445455	0.788279725337968	0.818468866910878	0.79011128511936	0.808291739555333	0.800170399794665	0.800566291750683	0.800210210598939	0.801692823770392	0.792338515837248	0.795378498767043	0.798394517223795	0.800534468418252	0.806029344965479	0.808864343982328	0.808267141892034	0.780404242598863	0.788019231444172	0.779442589904529	0.799085576650075	0.801718409610772	0.813758454533177	0.803496508887343	0.808270422798853	0.795425656795843	0.793722500816162	0.792347204179844	0.800346143352074	0.779294461581656	0.798763146836634	0.803490440019091	0.783896256655358	0.798083454282198	0.793493725096052	0.810448859733653	0.792956973571827
0.816378093982828	0.786770939905178	0.791190631401733	0.797321950282696	0.798824312435623	0.782430487450011	0.787042281736059	0.813817242357036	0.814827843020895	0.799227768628295	0.80618547510806	0.794067836285761	0.792051796587228	0.796257135660485	0.807781332953253	0.805542355970905	0.800936247610199	0.80208562679452	0.779153623938057	0.800115906618188	0.806125829079955	0.79553168504329	0.816803748659037	0.804613058217422	0.808170857618246	0.795434394446788	0.792803848423852	0.792628346636082	0.790045883412937	0.79462579167295	0.803631994934307	0.7929831429637	0.799619796046805	0.793148627918481	0.797294763607671	0.79342369227341	0.77755061027534	0.801250469033417	0.787911028981306	0.801898223828017	0.789035415915156	0.804537705357786	0.790143289182666	0.804317994819087	0.788626851128367	0.787548406745889	0.79097690719467	0.794119898860658	0.811706529750609	0.805521863795737
0.803643527907805	0.796367652928673	0.789184013576619	0.792575282664658	0.797471771458724	0.795224408413554	0.790688624641357	0.804480446352126	0.792896548678042	0.798117177046204	0.807498189971107	0.805101733315961	0.798024711867265	0.794729276358186	0.799645962061182	0.804050258745123	0.818351365802327	0.791365254661703	0.806411201351585	0.782991605897569	0.788389563485639	0.796051390942446	0.791838688385809	0.794529517577261	0.816310729680847	0.779076380085894	0.792741647042029	0.790954456522707	0.798264926783884	0.8004528123042	0.820903238467309	0.789277156503633	0.804879196440953	0.796003167343089	0.793377731013042	0.795695651218208	0.81380846174228	0.803020312554244	0.795898935656466	0.792936978347956	0.789587171492416	0.819142753870885	0.818562339265702	0.795929483148808	0.790977346348068	0.808060387012008	0.795028286695528	0.786873087453111	0.807516991383487	0.792569911984101
0.809593372446052	0.794744573843741	0.784679523980471	0.80926707804473	0.795364374376537	0.788888611918277	0.785186483866637	0.796116635255885	0.794396131286854	0.790408266606594	0.795010059634805	0.794155352081284	0.791805892859508	0.782094891219371	0.794724284874422	0.806703774240606	0.798126744427366	0.794441811102998	0.797593889854051	0.783159285474952	0.809339054623553	0.787199603827307	0.793098656340995	0.802420788103597	0.799706221752958	0.797149077857539	0.798241821234352	0.791905815744004	0.777940645162147	0.801372046768839	0.808326983412188	0.800047816751756	0.783075259852281	0.809930851658376	0.810369877557058	0.811282667146941	0.799666866236383	0.798526060092551	0.782689954382897	0.804489420532743	0.80859983145905	0.785553604733546	0.792346880481186	0.801614062097373	0.801963069901433	0.790011928545245	0.793674192396233	0.804727921346567	0.798327881828978	0.800499806306249
0.780811989740054	0.808665461414233	0.80110530847215	0.8000369951153	0.800904816831659	0.803340787685303	0.796328667835957	0.769226468846919	0.803904745862452	0.822254364629828	0.793442941108005	0.800392938452197	0.807985925570856	0.812093534523608	0.787909353267017	0.80136474958477	0.785871791327528	0.804778807844173	0.800912905036105	0.790495137928885	0.797828120169414	0.789047449937347	0.784850979590516	0.783409527368664	0.800200897320266	0.803753076374189	0.794943373456268	0.780935698361608	0.803055121025773	0.802122721177768	0.799725341634076	0.794074440714708	0.784908185779405	0.815852466895714	0.796508944845523	0.801006892032512	0.802197418694316	0.790931894149079	0.812285552336486	0.807951393662174	0.796766501144897	0.792207110283614	0.790302641439024	0.797858690339787	0.791936706569779	0.793213955780227	0.802668092154435	0.785419506511505	0.789813434618178	0.800877733727148
0.799339395258547	0.796296832195837	0.800775702449241	0.786130771835218	0.79240583868235	0.805777291923779	0.788484731459702	0.789983621768199	0.795882269469668	0.797921750475975	0.798651052907026	0.797667893066065	0.79344339702632	0.789853812071013	0.809548066203863	0.7999865736657	0.799261046473524	0.801935161095614	0.79225426204118	0.803589619619265	0.79081466785125	0.796222369216504	0.811821208117648	0.7802609295913	0.810739474829802	0.812585353554986	0.790608831445191	0.792105122102339	0.800963936106082	0.785919576311505	0.787554504449604	0.787598582504921	0.801959879968447	0.806622204612059	0.794411187375059	0.78886718942232	0.785768181859647	0.784721228833565	0.806763741601005	0.780383934265326	0.820758952090896	0.803308192246273	0.786023684099141	0.78021767377465	0.800971306682629	0.796297700097764	0.80366103548004	0.808114107859644	0.791333050173292	0.798247266649523
0.788568018534299	0.797684702466845	0.778667212139122	0.77734961146741	0.794836500771019	0.793598274222707	0.784029638290242	0.793410226221501	0.800392679333353	0.786693816101218	0.795388882367762	0.787205365936235	0.800099514158768	0.780897667465853	0.798037255627694	0.784181910229477	0.808541221772974	0.801660640123967	0.79347028621481	0.791307127988997	0.795199963002517	0.800682605102241	0.794959165961687	0.797708498938338	0.790174197621019	0.78468234682466	0.801782328378777	0.791693624210183	0.801258889201501	0.792948634264661	0.797682640033618	0.796739752786915	0.796779062483224	0.791886561407579	0.794186925761317	0.788513056555616	0.808915985518322	0.813507361260935	0.794091535046377	0.792438139059595	0.814071387703078	0.792801826946309	0.790095358817707	0.790361773432766	0.800392133799241	0.792873268126689	0.793514206834629	0.783038906412539	0.80834793798994	0.791638509553026
0.795243596741265	0.802452353672969	0.788258901969136	0.804639957079892	0.789711738003831	0.795463332320244	0.790055205412802	0.786516953012458	0.790130045937957	0.787524126147264	0.801205335258991	0.795311016948871	0.785759293703704	0.784197394265406	0.78877986670413	0.811282713731003	0.812991838542578	0.7934054554357	0.806828594624709	0.793233734877998	0.779957661215485	0.784539338706165	0.809512122586437	0.811300142188608	0.78949417210074	0.812280873369999	0.803738769475093	0.792012113382105	0.7962375437705	0.79473240554315	0.795298305668912	0.796207274584275	0.78997955071693	0.811787260311206	0.80755714848851	0.805581559093208	0.787870108212201	0.803276019681722	0.81763531856864	0.795866592313483	0.804809569799123	0.798437293294209	0.800422914410622	0.789081436918838	0.796428760925144	0.79873088441228	0.79975059695875	0.805274386792907	0.790830833493679	0.797947414954695
0.810804014602234	0.818915075693627	0.800046992989306	0.806725478068132	0.797851725834984	0.77061511572159	0.807614405452261	0.801910490632515	0.801938248387968	0.778988591537824	0.798006513573449	0.793929347395781	0.806580895495838	0.79582645451337	0.776005179338492	0.815355522789682	0.801293462459721	0.790661962692874	0.788766810771251	0.795372365659461	0.793262709201304	0.802968265620126	0.806824853389435	0.803461711870544	0.78791553047436	0.792184906802589	0.798795159069781	0.796628020619496	0.786474098341141	0.792437782421023	0.797127600876574	0.806344749717275	0.786249835780998	0.783025114543703	0.816167518745536	0.802029222366962	0.801534384065204	0.785640329521139	0.7966333223811	0.791049803536363	0.799761333090403	0.79811516532261	0.802193171451222	0.772209128672248	0.797058469670818	0.777739051038015	0.788369961211753	0.792593282124814	0.816916881029217	0.800959610710458
0.78626885283216	0.803495312821643	0.799918423256843	0.808781585863709	0.784685963601383	0.789864908071997	0.779639669757258	0.813751566790517	0.7921780773712	0.785198683135694	0.788085084783187	0.800447551299016	0.801481158379702	0.792857403008344	0.80214019345099	0.803470579308774	0.805833294979711	0.804041511310753	0.798036262408445	0.79587283188988	0.794254821774268	0.81400629310925	0.808588861002249	0.808387105973249	0.782079337464388	0.785661368063431	0.814270466119755	0.808826539431661	0.792564261251349	0.794933747611995	0.802642440918723	0.800164298589084	0.801705063336611	0.799733423290475	0.796175736749823	0.797171291303065	0.805023578272876	0.791328174415445	0.805257758162948	0.790070357821548	0.807186913712688	0.793085082283552	0.799456707428316	0.777795292037827	0.802430754147429	0.791813306968239	0.798820187461709	0.794342401485478	0.795107535465535	0.794474467075293
0.799630016353865	0.78091313162447	0.791014665728264	0.799869823216905	0.775687222663103	0.794893213848806	0.802697938681907	0.80005308038787	0.792743574616607	0.78974875069123	0.807720517267508	0.802997040483157	0.803423406690866	0.789430653802745	0.795570967826945	0.802773377662859	0.791591900363468	0.803171547492145	0.79543983009336	0.796535076318342	0.792352481820401	0.795254306133245	0.792816707323792	0.790942824096471	0.811474770649966	0.805847865447734	0.814024397160016	0.799803154776833	0.795159016699235	0.787702906447855	0.781672182977369	0.789676949395732	0.794166841478966	0.807304688690702	0.8092965921232	0.812119920170557	0.78658268969154	0.808856797333281	0.797698928601921	0.807425429588925	0.797231768655032	0.792068228464079	0.801450390368171	0.797170384733871	0.807642367254928	0.798910177393547	0.80113270448816	0.790811103907297	0.802816464636057	0.78865627333065
0.811893254577515	0.789887039252041	0.803569884707652	0.808816633462715	0.802399243509834	0.789819270706293	0.790072271455739	0.791821304555058	0.802279409965639	0.776327208966637	0.808389425245878	0.792976548192925	0.790965185671652	0.797495204540709	0.787934513316907	0.795689015777197	0.790902406618777	0.782985063533399	0.792863512414615	0.801979769137619	0.793389370997913	0.796066144267453	0.794344537665198	0.797749944690221	0.798599470035805	0.801075326677848	0.7981689371829	0.79345825337595	0.7904925102516	0.786804876879663	0.802470141805744	0.815122812282317	0.801015436662161	0.79768518135517	0.798427868134769	0.78375666865656	0.790755042971797	0.786547236650515	0.788994235045858	0.77345275650498	0.783764959068749	0.796709222815554	0.800211203551294	0.791056503083652	0.789845156259775	0.78322109198113	0.799394083213041	0.786326057939267	0.793829460309448	0.796689976520417
0.785071953458782	0.798233923150228	0.784843639201449	0.804908808719094	0.791975655088976	0.79480294281669	0.787369583871079	0.789735916028777	0.791493625850715	0.773046659755821	0.796955411358939	0.79349129392393	0.777120837698579	0.795897669288884	0.78986375950742	0.808323237804224	0.805717802983276	0.798228727271229	0.78532858353172	0.811041642479435	0.805991576740247	0.782344959511158	0.802509215146062	0.790419082446861	0.780118963060879	0.780480850600044	0.787058847263405	0.798385092933014	0.783792701628369	0.803169772582147	0.798991992506825	0.79597070118069	0.809272177957547	0.796786926868786	0.792469994274737	0.798334740380302	0.793831352958101	0.773663095433363	0.808075995740621	0.781530532053464	0.795489832233952	0.798367668591762	0.79292306116566	0.794803090147967	0.792747633079332	0.787197947885494	0.810824063019657	0.805362099437353	0.824257319956253	0.791907758994963
0.796325918901813	0.783154481250993	0.790360065684059	0.786352695938752	0.790921049897508	0.793550475117938	0.798126416477243	0.800266998442042	0.796485619990003	0.796818145987586	0.804204268342703	0.789800498965376	0.782512148050313	0.793580196278541	0.7834698750088	0.789641083345488	0.791396469447677	0.800202469448799	0.802766463899136	0.78008377591519	0.792990118800935	0.781527308345057	0.793117953466899	0.78403795021493	0.793082562021211	0.807610201321641	0.79626555254503	0.791152931764456	0.797355532536569	0.795230627758347	0.788904336051867	0.814745092974865	0.785729690561874	0.792704335902252	0.78645332891424	0.803276910676641	0.796750722244214	0.778638936359098	0.804470731397028	0.772907982150881	0.783089349528936	0.791886120172713	0.802384402303804	0.79391390538211	0.782084785450984	0.807177418364676	0.804312531403525	0.784815959997539	0.795814801479354	0.791183120752634
0.794018165250365	0.796084493944632	0.806871227116752	0.803279438762382	0.806875542049053	0.771814913261622	0.815493957499263	0.803162493117423	0.814119823885203	0.793179579980372	0.795735473010493	0.787902965906101	0.798550615305661	0.78331996291098	0.804504987029019	0.804283515009764	0.79086436164817	0.802214443550015	0.778270635105006	0.782827700186388	0.814556822470514	0.796667954636821	0.795930356231985	0.775567996318314	0.786833876597954	0.794370495941086	0.778900562786287	0.780891983341581	0.798768332110784	0.796335840490515	0.780938599298701	0.797473828643874	0.78155202874469	0.805402178859297	0.806929680224959	0.791241539224043	0.800810757488263	0.802492970511572	0.79537224990528	0.792421115186848	0.7950667967993	0.800883158941145	0.808631234618895	0.78742448576302	0.799678286648885	0.798564166342834	0.805157483335236	0.796454178433619	0.796294621433187	0.794925966915517
0.794852688661118	0.792174496791711	0.78754418089732	0.795925886214067	0.797234179950474	0.795820310865354	0.808365270837711	0.784613224679322	0.803407846007351	0.784388618872965	0.803822581117322	0.805665444137114	0.779866463192626	0.80431377301482	0.798557183556371	0.79525048506654	0.789789502720979	0.807373872666912	0.79550978289955	0.784129703296846	0.798973626052366	0.787549610404625	0.799557654822938	0.78658461439509	0.803327235838686	0.798921587922305	0.79632446404393	0.794220493194261	0.791485246499048	0.805244832405338	0.782667917790634	0.810080490668325	0.78573130327528	0.790667762667609	0.801079169754395	0.785035778137894	0.789446480375503	0.7807684341619	0.800518558796388	0.805307520280711	0.795231118234311	0.820237025423507	0.798344846693145	0.794242422081556	0.810739023351074	0.782516259643032	0.798140412927619	0.800625785733649	0.804698003704738	0.791307097848864
0.800092325654435	0.789096438597641	0.803196874289244	0.799746985252822	0.792883881038895	0.787370276209547	0.785768400088163	0.810784688350765	0.772644849281754	0.793571615812542	0.791428656126224	0.778399794797007	0.799885966339849	0.795690709052449	0.793693682473722	0.798875443591469	0.797497802582539	0.785878481707221	0.793119597308994	0.794542400786107	0.801174658048038	0.778529407838848	0.813034710465495	0.805295895250492	0.797639851303922	0.794293973891917	0.791652571294374	0.786174396344918	0.793808217176526	0.789276673814043	0.786117828241919	0.803606519282528	0.790845810307614	0.801741093828029	0.79152266383611	0.794240251223021	0.795480103894858	0.798740143289314	0.807864966048748	0.782838104740741	0.805156332524146	0.796919842519431	0.801609464742876	0.787246982571043	0.795438565428858	0.792565614258693	0.819201465907844	0.798593235695332	0.794820814745103	0.800772172050605
0.795650815030137	0.80792476778107	0.803809507411892	0.786316874588798	0.797017204634489	0.80153081406985	0.788312682978202	0.803138046789922	0.780884296120688	0.796233300925872	0.790660044343129	0.78851973771944	0.791252836583355	0.789395057180112	0.797228059540136	0.794079636936738	0.804881729787841	0.8088125836381	0.791905423216128	0.80073290925931	0.792535290086107	0.794557452042988	0.779656871670987	0.786070091790057	0.784894339916341	0.796208843063676	0.784171952253695	0.792973493041355	0.80354424370206	0.789000807337924	0.789258331890723	0.789470175993179	0.785229598565973	0.785022746610066	0.787244142004021	0.788977545288984	0.790360084966371	0.807957066567859	0.802200846780451	0.804684386561564	0.796486487261074	0.791388760284934	0.793687025751595	0.791765644175351	0.787949971369974	0.791224433684494	0.797904497970718	0.801348862231715	0.782923614253973	0.800202536511339
0.787394056495884	0.785480114974345	0.789823505513041	0.780317463328488	0.798408667013617	0.803957944789193	0.796986902897919	0.803744781669619	0.778007402447733	0.786051506460212	0.811246912732063	0.787929968874128	0.796465160415738	0.812092772536154	0.794440583260016	0.790844382893496	0.804664502158087	0.797476558504802	0.806689860078856	0.803712636935975	0.802529083137848	0.79678435866203	0.788964302876145	0.809577800692409	0.795794346984801	0.785840312117552	0.797093285067448	0.805739412735212	0.792558810255863	0.795215417888895	0.781488382237629	0.795835236096177	0.790131758165147	0.799849366222814	0.783363972669669	0.797218687024733	0.79518935257823	0.796751489157006	0.785575153088738	0.790988587759205	0.775963647001044	0.803146422598915	0.784519565011127	0.800956575049968	0.79954297345967	0.79797032245991	0.804087670284781	0.782637907289219	0.802397218857494	0.776027473343428
0.797374631027096	0.78456123903147	0.794119538996561	0.798230779735433	0.797865815829261	0.805350808275694	0.799499847696663	0.790939921642599	0.790471273254726	0.792358726930788	0.798527671109163	0.788782561159002	0.78128363193763	0.798774938021737	0.781126030415049	0.7960565823135	0.793251227755138	0.79458407414782	0.788575089618425	0.774734328304255	0.793071060894235	0.791316926622787	0.792477065915947	0.794560869521942	0.805015242847059	0.78509275516748	0.810289464048723	0.793373980927068	0.782388078839162	0.80645454823434	0.795344305832044	0.801456199796033	0.8031843763051	0.799089351401317	0.809080589636437	0.795652838005874	0.777761210123834	0.785535521045167	0.798465502905164	0.808457636219576	0.792890969614326	0.780097807973754	0.799747478487584	0.802451227709309	0.782163840636232	0.786177455751774	0.797755349534143	0.806998663514213	0.817192467457065	0.805433232687368
0.809732296140731	0.80593825352653	0.794348858250781	0.789295268024881	0.78329962260521	0.784362293377927	0.795619395428213	0.800072346184362	0.793755981066654	0.779729054822202	0.787200734639049	0.790607623269128	0.784156178574145	0.801501914065056	0.803190676480334	0.806081715093972	0.80695637844545	0.798172631180469	0.784284808139243	0.787603663216288	0.797357024294832	0.808100933958485	0.793952078541671	0.791108796792043	0.790385537313899	0.783655027391824	0.794931150500934	0.790828665849989	0.797053846344999	0.784368736076461	0.805331174354831	0.81145870727895	0.780193745172644	0.80949133010048	0.807336992051619	0.789892726622078	0.797518735875463	0.787867085625966	0.812598596956332	0.788281328550513	0.800246461802495	0.806312006928124	0.805948038314404	0.792987365140503	0.791094382076992	0.77890607018944	0.798320440757795	0.803161104984056	0.793184896649475	0.784375787548682
0.792392933136935	0.790108972801163	0.769194054559126	0.800388791145419	0.795951345334357	0.781675485313745	0.804311194146072	0.783789378555563	0.80294059634708	0.797355044673451	0.801854188381819	0.800195326206616	0.796274956839394	0.801676360574712	0.797816029076845	0.78885770488712	0.796377122424308	0.784873074458903	0.800200636716514	0.778094390894605	0.816296644343201	0.805188792108582	0.79990042202757	0.802467668101547	0.792840996729167	0.780678955966926	0.773259302953355	0.791495359232832	0.780499503090387	0.793512785163663	0.796498894409374	0.79270255747643	0.79172907166839	0.810215767854187	0.784533737067912	0.792428884597012	0.794567863214351	0.803526851919711	0.803197579023623	0.806396644233572	0.789730391194026	0.78662143211728	0.80408757718663	0.782572330043638	0.784020588915389	0.799238492173665	0.791143153920298	0.794174076984089	0.787976774599396	0.801579448488994
0.808075191036303	0.797374831791252	0.800237489210479	0.782523864005323	0.777225775998679	0.775368926442007	0.785829351003814	0.787950682087424	0.788898894473805	0.770810435585703	0.791241591390441	0.804504080562623	0.795163956385875	0.791892305495794	0.801160384797608	0.800132601286826	0.793786843976117	0.790941588985164	0.785500722951963	0.792014355171969	0.7914333515008	0.809091653693077	0.801283625203083	0.801727618682722	0.802613200250591	0.801798679415501	0.797552681546391	0.797078386560984	0.793192962923205	0.788969956417215	0.801061083552086	0.80340104909618	0.795953884106649	0.793832493244773	0.805933804533242	0.790393523126462	0.808588349411829	0.800209985675216	0.776370234627943	0.79148767832031	0.807440877691459	0.79370905990064	0.794941471987352	0.785556272836705	0.788051813202804	0.79570073131504	0.781971940894436	0.800990224161608	0.797283986187236	0.798696348903119
0.78783960934184	0.794474105859486	0.787949423342107	0.783878778353096	0.785783957411878	0.794251429086216	0.786529323371471	0.794196814114307	0.778639539682808	0.807543384965641	0.79818194219706	0.791929062048136	0.792108521138171	0.788410735300302	0.794724073398404	0.794154575416355	0.796766486763179	0.797771458427871	0.807811306286048	0.81079320929865	0.782985184999197	0.79161964483113	0.791031447415725	0.774020678607061	0.781874786120022	0.805282672416294	0.805472934948526	0.800076005159369	0.786823576348499	0.77994077434899	0.797973093010582	0.800895228902685	0.798245355754352	0.805571486897267	0.794788613834686	0.777411981539095	0.80152081955541	0.791473568544398	0.794418426501348	0.79007668253542	0.799068924969236	0.795938030981539	0.788718653378439	0.804779468533759	0.793042881467258	0.79039931527468	0.789488631970772	0.80009076421158	0.793190061518102	0.789745315777289
0.787271723993297	0.784385299388818	0.79492089514255	0.785773809820298	0.804980521125036	0.801427947893794	0.784914871598704	0.783732284924907	0.779444907476798	0.793706491983281	0.787695374770679	0.79167634038504	0.794614474240491	0.794144106502326	0.80270533443511	0.780152868055963	0.793168705245816	0.786921816598183	0.793628040480775	0.796454561186723	0.790613441608761	0.788559984450774	0.783961680366336	0.784296069315194	0.781778289382318	0.798318282788222	0.783519653266433	0.783335104715936	0.792033770234398	0.781053720312615	0.780654323944758	0.807599876713888	0.792260104477613	0.786435314425831	0.807095878044925	0.793223248494964	0.775909228892124	0.796946796499268	0.796085559380245	0.806530004618661	0.80750108716117	0.793274228685055	0.79568893414433	0.789582236253104	0.787153776725367	0.787178338549084	0.803199811701886	0.797742953866936	0.79866558523829	0.796764765652836
0.788055254540835	0.791896379973868	0.774411381841854	0.784373162772387	0.7981399914603	0.78235194332643	0.780491006565628	0.792328937550073	0.798974758303573	0.77604019442142	0.805022614143108	0.795908125096413	0.790545118547889	0.78821278963505	0.791848627336228	0.810112987788183	0.787983620233505	0.792408743129605	0.797348457255793	0.822343962427025	0.79217641297824	0.794146813032888	0.79706173986791	0.792791858831766	0.807337793070279	0.797614112518411	0.810258710869574	0.802762703391525	0.793557192196861	0.804034872243406	0.796247762874735	0.793057630711077	0.770821721057405	0.789580893718136	0.786367692749248	0.794895561509111	0.791266513359962	0.784618161773045	0.803776008158611	0.802959791014953	0.794510201602018	0.786622180454132	0.802410181379193	0.797253138294787	0.779857311243171	0.801676471102106	0.792561516621356	0.793354702587313	0.786622099485891	0.80086992077506
0.790962749478302	0.801871502397749	0.777632786109733	0.803702368478481	0.80129232791663	0.799451490024456	0.783003010816767	0.77808008560941	0.790876342375577	0.796845786819434	0.783015049199098	0.808048561923083	0.784604058291072	0.792656169120131	0.796054963580579	0.785543968547394	0.788565157466048	0.801277579847868	0.792826138295946	0.788528106316786	0.763934609612544	0.792898618025494	0.790938603813962	0.803619303561044	0.784537872944779	0.778472353909613	0.780028853814172	0.794334622727662	0.798756227455475	0.796952244146814	0.798589584128195	0.79301453832931	0.794534306581722	0.79988573947054	0.806408106358965	0.792795852784612	0.793835649405506	0.804830095813594	0.786768072771808	0.787036309873231	0.807431598624476	0.789361900227321	0.791057475049039	0.795322184638678	0.796109665152988	0.791626728210817	0.788415809479038	0.791537474628524	0.790077500254038	0.806618436354716
0.80474862219037	0.798236753530406	0.805809135886859	0.78899525132914	0.787971539902307	0.78766393511726	0.794589984906059	0.794932210021478	0.785221098780085	0.787025773330744	0.780661400291016	0.802740976897973	0.78867782712536	0.804595253854505	0.785594141593038	0.795648469743144	0.789120558387835	0.777325024785062	0.791676587881492	0.798933896784731	0.793746101199328	0.791332382593134	0.787999186831408	0.803725314830226	0.809126691340681	0.809148847169765	0.797590598975326	0.787391349677124	0.809131499619964	0.80338074952015	0.787952728484911	0.790717000401632	0.790000487584563	0.797403854087875	0.794516415615158	0.799181631844213	0.784684401555572	0.808991765078944	0.789988187623284	0.779985834915477	0.792614662984411	0.793343992337247	0.797942894460777	0.791223333885547	0.80987735775927	0.805243673240685	0.786784249561848	0.802182637717184	0.797555566744719	0.795512089874765
0.808838257769741	0.806440150044618	0.778403576086124	0.778091135145756	0.786491983095196	0.787913630535669	0.811728248957297	0.813493647739426	0.785883852160859	0.793156803858358	0.803227221948123	0.794545858518195	0.797107973271649	0.794906023615498	0.801792863027009	0.791087847826157	0.792478805564636	0.785613083199003	0.785475215930132	0.815375177311905	0.792444283373287	0.787668367962983	0.795162563839742	0.798988706121125	0.77839402149811	0.804017720531696	0.792338846273351	0.796778578360618	0.79430492628283	0.797107104068663	0.775005298763747	0.791354513158906	0.80391886500458	0.794622479379799	0.813222647042898	0.788513758774478	0.765996812499447	0.777612304844882	0.788622784964923	0.784379340144031	0.798806349785603	0.797177159685268	0.787475288205107	0.785665826118691	0.783788422990873	0.782599550632175	0.794787032246724	0.783637139023401	0.793218810791419	0.794815472772567
0.804445860942232	0.819380900017033	0.785604831337772	0.797235809635301	0.780446822853503	0.798618993001648	0.788202364849308	0.792344843457412	0.789077716165237	0.804244710635996	0.799561186879862	0.790515267621959	0.769377332570937	0.788441286618149	0.802447781754539	0.79875551478698	0.801125076267819	0.79688033884314	0.800082631224557	0.803001217530428	0.802800777890913	0.799847889939787	0.795315883680428	0.795215548582822	0.77044705740959	0.797467815559299	0.795931788082306	0.801930697973083	0.805191933859199	0.786707804693593	0.787356176201514	0.793515919406597	0.775001602612672	0.802480856487425	0.803915459951034	0.793418557054461	0.770449926895256	0.794594387617517	0.796571695468203	0.786362158393058	0.788977775657324	0.788681620002789	0.795531766836243	0.79519219960144	0.794055341550775	0.786267750477984	0.784528435037279	0.795543011622522	0.789882837042053	0.793598863043086
0.784821600744818	0.800883748880413	0.790062234231885	0.783031537626886	0.775134837076582	0.792323690122254	0.794510476586949	0.77882544673346	0.788194899358712	0.781765458416238	0.7887463376429	0.780276430967424	0.77720466274879	0.783163408219704	0.790950687041699	0.792033649073783	0.786188131182481	0.775721518866878	0.785382920564796	0.802352831326132	0.79050877711041	0.787908737118122	0.794851667539962	0.795193954147931	0.781995968776154	0.794208576758502	0.793846602838677	0.790062046981649	0.782786257338313	0.806247429234969	0.793418800829312	0.789733492685778	0.799291214396726	0.79509479666754	0.804216426265796	0.79198765764679	0.793486635701562	0.789879259779694	0.782188145319159	0.77263249216724	0.799690116513255	0.777370268998572	0.795944552858186	0.784759561925597	0.768031869922102	0.801281321849585	0.793157911134842	0.790962455387122	0.786826454294343	0.793057528916185
0.807070903800445	0.796268878073099	0.78561659282652	0.786666606022528	0.783116171837812	0.785374612430932	0.779721518907643	0.777554987539264	0.801783575144966	0.789551208380659	0.793610484696208	0.784405175283236	0.794892869897044	0.78825318839903	0.78535856107733	0.793386879437275	0.800577060368188	0.781022067468256	0.791495600240601	0.788600076066971	0.787047449773632	0.807373472270442	0.801362237377688	0.792944244882085	0.784918155828307	0.8026374810514	0.785174417797618	0.809780678834423	0.79050785043368	0.799120352925888	0.797014930240426	0.796126987769347	0.812717791635835	0.793953645348255	0.795819973966849	0.79602857274617	0.797358095122536	0.766795968499518	0.787128941378341	0.773286468014593	0.806278812495492	0.794990809522529	0.807222643868091	0.791897095106361	0.824524000892516	0.786882118065517	0.787642411513214	0.7904966296967	0.782953576842619	0.795900670065782
0.786651814617211	0.787617994152815	0.784406804606926	0.78913240733726	0.795629596450602	0.798916704880275	0.793740322352745	0.806085089979316	0.793893537920966	0.794806875135353	0.785857763571146	0.795849972588414	0.799308674739249	0.797836216440899	0.789490858895398	0.788941575088615	0.793090536277076	0.798222125994449	0.793385924158902	0.789526442227942	0.797877906123334	0.794073250099326	0.795936040237592	0.782640006886157	0.789743013325996	0.777947167893445	0.807520525817466	0.792704652086993	0.786765945913477	0.780413909359888	0.789766107264717	0.810285564935329	0.782629331850934	0.794597362111433	0.782101936894474	0.801416862398789	0.802297199059542	0.801374320648628	0.81447431522459	0.794883279459306	0.801631562816147	0.785623068785374	0.793511251473402	0.789464527650461	0.819971700703444	0.789504296834052	0.795547437090617	0.796158114256401	0.783841710129188	0.791890959880176
0.789108510985726	0.782925253186882	0.784974494388845	0.806524836652517	0.779778474635275	0.790675185397864	0.790817482163303	0.792422518416635	0.803766929029578	0.794950504445365	0.799353079289763	0.803861889848795	0.779325486480792	0.794898115677797	0.796064290825157	0.791489948975955	0.80767051081847	0.808224584041833	0.800272242521041	0.797463758145655	0.795783626313476	0.785489560227211	0.7877342098041	0.782951763150029	0.797205925407921	0.794416160985833	0.805528610884976	0.794636450074337	0.803265341164169	0.788909681278712	0.79055354282684	0.804678820470038	0.790398697353305	0.799435640126268	0.782010880098706	0.799584205406204	0.798564573320966	0.777740621011847	0.789887609684366	0.784500354459827	0.799162674139377	0.79821718336533	0.803803074464186	0.792926637654625	0.802475163774919	0.776925225664799	0.783968325029154	0.791163701483015	0.799452586146978	0.795878929483947
0.779188807100563	0.799001206246606	0.796297809689961	0.789359790400234	0.805987377064887	0.788782116433322	0.786931112657838	0.787512352839729	0.787692230552528	0.80201969431482	0.799511369251941	0.789332760551246	0.785729720442203	0.808390863823029	0.793874692850937	0.815370354574255	0.78611548421169	0.791987204055876	0.808158873931398	0.811357724262419	0.79618960673816	0.798765338282824	0.80232129932993	0.787215243139303	0.784055941208326	0.806923773417617	0.783180301717321	0.795060301740782	0.78194431026274	0.794179868252001	0.77833787912179	0.787637479473055	0.785029786886557	0.788335689800606	0.796959707333644	0.787648306844884	0.792946887468447	0.804116108859877	0.801309476543008	0.806405133409681	0.79209351698638	0.785536070062279	0.800766286468739	0.780645517838379	0.798166224417003	0.790075290796465	0.796115489046754	0.789314133820161	0.798742529836645	0.778532113995096
0.78935657517678	0.794349893422543	0.796850364976382	0.79990526524318	0.779621342152096	0.776249968126235	0.795134648827935	0.793507909289989	0.80959563415389	0.778124968069227	0.800639191701236	0.788332151490127	0.784072190969492	0.790212295772626	0.801534956549794	0.778310622868397	0.789517802274311	0.792027989349472	0.79673457689131	0.776537679325231	0.802916934367769	0.776563577032774	0.787090433593812	0.787670416593676	0.777502435959554	0.801155622590518	0.791425775612813	0.804122495266582	0.77659934237427	0.799570152219845	0.790452249858174	0.796217539006722	0.783530218952165	0.797010696064644	0.783750946165683	0.789100631273536	0.786656764515384	0.796909498069569	0.796042499045622	0.791456971632327	0.788887598239138	0.788725841698667	0.795120272344079	0.780382618942901	0.79582734224756	0.786249969000292	0.790513274936341	0.787165447769501	0.804752200018205	0.795701682160341
0.802602742009744	0.790744226018577	0.773354800017911	0.793326850461595	0.789333541698063	0.786273611616553	0.792262229064154	0.780062467299031	0.789417899614876	0.796664103685334	0.791766997121928	0.792817778564527	0.776549541685895	0.798754295419749	0.789818374226351	0.784766021907039	0.781624138464333	0.787169052251367	0.794080942917895	0.792493763714977	0.78097173356626	0.7951400888758	0.784824980823189	0.786545391046231	0.793552188724954	0.799421430838687	0.776659526240477	0.789283711749449	0.793237895969562	0.792191738342771	0.789897000141058	0.800210428019723	0.781608629697096	0.795449680794562	0.795932846390515	0.806065225864953	0.793828524964026	0.782457328873944	0.78650787820128	0.786540374057204	0.78998139443677	0.79171047786776	0.795413750750402	0.793822196432528	0.775058665912285	0.798246971059838	0.795112899536249	0.785031470039244	0.799770352452813	0.800936166265443
0.784580437266009	0.796100877649738	0.780372271072739	0.790305338799861	0.808001320302321	0.788575850518232	0.791933340833398	0.792258287791982	0.788281111263325	0.793252116067465	0.803102196769001	0.79922804921509	0.783455526327711	0.784917843264424	0.793941109822035	0.791378008686995	0.791657439554054	0.798060204510067	0.796133397124693	0.788075973163046	0.784318636349048	0.792034984727687	0.797295202018143	0.791899819754136	0.790163663743517	0.781477927285245	0.805164923950045	0.786432893787457	0.793235824965575	0.793552114352454	0.802395311498919	0.789526146652404	0.791929925732177	0.809720152968592	0.794596016039395	0.797166572740258	0.787685801981154	0.789298030926916	0.791627931292194	0.782945741045754	0.787549711130492	0.790404051457926	0.785740421734863	0.78724802351806	0.778415948291974	0.781313125637179	0.796696953468004	0.782139648319199	0.771535427511935	0.790599076332295
0.786407951758746	0.80139260357693	0.785450006765996	0.802334268321873	0.785127497802717	0.781926462397683	0.790230608646515	0.802482046874285	0.79294946566141	0.780328401904568	0.794684239168808	0.78353344780135	0.790150109807674	0.800129095007585	0.785647144281749	0.789668074109613	0.790409134592192	0.792215270787457	0.787646331267701	0.790797428357787	0.794456238407871	0.800774355090802	0.791233055766995	0.792555762468113	0.796139724996627	0.788338097255313	0.787640773030495	0.776387163520918	0.809071966579551	0.78709345145293	0.779309924415004	0.796934451140069	0.775776168450236	0.769698408570932	0.793264808750895	0.792400455346086	0.794711355391502	0.804516619906551	0.793859172857851	0.779606438090495	0.787500350509069	0.78481070672663	0.797868324580597	0.780247391989491	0.802810222249958	0.777839240197157	0.792780079269661	0.78055391514787	0.794653377417351	0.794992470706953
0.796528900668201	0.793615890348438	0.791495249974872	0.795216950289621	0.808307578484481	0.797389647772044	0.781158430266131	0.791403665628816	0.774088787849009	0.80166079385309	0.80734459998303	0.796313611130084	0.787659493523096	0.799715572268602	0.783304386200054	0.789313940674649	0.781980800883374	0.777984687997473	0.785028412810383	0.805772083698635	0.795927086388965	0.790421023669235	0.793245585731496	0.78380024413378	0.787866901528277	0.794446117202721	0.794900913838006	0.783471221392226	0.78543787982257	0.799219280597395	0.805344903428427	0.797000361379874	0.788237725882403	0.7975373407847	0.801359876119953	0.786510639395754	0.79357317244611	0.792709826366064	0.796015321801942	0.790199030407963	0.789745228072959	0.807574295153348	0.796453082161623	0.780493435409106	0.788279348309703	0.773927885679838	0.79459793843735	0.810198537302977	0.782952308321588	0.788055826573257
0.795066945265944	0.788907501790478	0.789989402221054	0.795078407750896	0.787904408630574	0.780302254222087	0.792913832846881	0.80621255725531	0.807907680227556	0.781295437913719	0.798930096627825	0.798243602915784	0.784280441280659	0.797400363955289	0.790444502225334	0.793919190795009	0.802255585777621	0.805901969140864	0.7787256246973	0.770207755229775	0.790684245232054	0.793636588056434	0.788186010078479	0.790911351405971	0.792771238683632	0.798313549669545	0.788365601024593	0.800166098460577	0.794366464568771	0.787880829781877	0.770997933679424	0.804946356939901	0.793967377382263	0.795045367585449	0.791199219505242	0.789966980276118	0.782935940734406	0.795001176074886	0.787478688071968	0.780836731551143	0.801904817989634	0.785793139885689	0.783377824375522	0.784105735275774	0.792864970366738	0.793532841267359	0.790452838806838	0.789990995327378	0.789965602442764	0.795780659350972
0.78512332473324	0.794226218937016	0.79016847803756	0.785295495410697	0.786276825501392	0.804976997965128	0.789820194154677	0.772017243606477	0.77811947145191	0.778823933181274	0.787046429730141	0.776207213444878	0.79274131483391	0.785913661515214	0.794199537082089	0.792893776410343	0.786479959800205	0.770203086084429	0.790155687671579	0.798362600799519	0.784730268486298	0.785677888286148	0.805213142772218	0.791353946242264	0.793595186057126	0.783863873667111	0.808069278734679	0.795086846051595	0.795018740923521	0.793025725561506	0.801194836872243	0.785143889693772	0.797895378467879	0.784081884992483	0.811796911319248	0.787673137958315	0.787684270137593	0.79550777553346	0.793861986413634	0.790203407858725	0.791114811490996	0.791063400056746	0.782956212400407	0.796509318047268	0.808212269710605	0.790780902729183	0.783077101888526	0.794647868726304	0.794340495218554	0.782167669250753
0.783831181623234	0.788213410384269	0.787925898989711	0.773077524298157	0.7799412545258	0.790404111941172	0.792836995190323	0.785266284951308	0.797126803390112	0.787806864119636	0.790751370328088	0.788622901268776	0.800361781812333	0.789724220088414	0.803392396497873	0.796614610440103	0.808554948635863	0.783388067917055	0.794728428276616	0.790035704247519	0.790662993131401	0.77659854160058	0.794753340053301	0.792808871874055	0.800125585774778	0.802566251899442	0.794686763386445	0.779881856681197	0.797013244389484	0.786808896280565	0.800966213821149	0.796991418977919	0.79102295773742	0.79131105678463	0.790936784281265	0.787805753811084	0.779084743063936	0.791440165032136	0.807390961401343	0.785970384889637	0.804014381398857	0.789671586341569	0.77465081173061	0.790525040893254	0.782511605287307	0.775464059617093	0.79956484986559	0.783074658792246	0.800881532327174	0.7969783115435
0.789989776019225	0.782250275621316	0.795887128847058	0.774440852803712	0.788885082962854	0.785700793405712	0.787467979799305	0.794107658847164	0.771358201897201	0.798549369595848	0.788621308227842	0.790137293026668	0.794977765320518	0.790845233138924	0.796244217379544	0.80204495865074	0.783423006198942	0.789188073983866	0.79176195214241	0.793441777112322	0.801873364213205	0.789623018661559	0.788718747567549	0.782092070489886	0.793861794694423	0.792240240803434	0.798571618298636	0.792795295535687	0.798406195998842	0.804984621786244	0.768975067521641	0.785846988469489	0.792592049140791	0.793945395497057	0.7993705324011	0.776440537722496	0.78803904964573	0.792660165066542	0.798457802218218	0.785594359008531	0.778101860503351	0.783759550973948	0.792873658954209	0.799218556782349	0.787253099358698	0.788799650205596	0.777739169099292	0.786573032164641	0.795538973842873	0.809907037581697
0.800655678695178	0.790299575025095	0.784909752644621	0.780405532766001	0.770605202654602	0.782900801314263	0.786389185310296	0.781955395161157	0.79099564947288	0.791918467199101	0.769112192512394	0.790198024028676	0.777419598613974	0.791152241920204	0.799488222754665	0.791223050827921	0.799400533281273	0.783628701979283	0.782430308293172	0.811100673836765	0.79074448504903	0.798510863901283	0.804385758593853	0.793236490786889	0.789461933554455	0.788260412581781	0.805437124325385	0.779511886304556	0.794056697884101	0.785183898227592	0.788077728067329	0.79415748691269	0.79092146434721	0.771641531337048	0.782726354315399	0.784385679852573	0.783764182068219	0.790525067918368	0.795266382783215	0.79353984874612	0.784479183893228	0.780062134440194	0.791527922148973	0.794903944350596	0.786120954939861	0.789779142435236	0.787721749935346	0.781034230463989	0.79293194233086	0.791160835141149
0.773321718488344	0.806797496884436	0.798231034782898	0.802663174950793	0.806175796956469	0.799877004119455	0.796236553002125	0.789687899837366	0.794540812165312	0.779951759414498	0.77952475428709	0.78858376293938	0.78148818332086	0.791186301469026	0.792669479994887	0.775777165436165	0.790950515900602	0.803912781556908	0.789387912359172	0.786295949037202	0.78974807436974	0.790188880684909	0.794570781435038	0.786663570539206	0.780967560664323	0.794663202499189	0.784153624340751	0.794345794219637	0.792833654485686	0.792598011963726	0.798119018119036	0.786848051283334	0.777989448501234	0.777665755904106	0.800040750972958	0.799533769881602	0.776854650628104	0.794649844120314	0.79253627242487	0.798129568639082	0.799425829988574	0.777850071919948	0.792686442407254	0.788244348647436	0.785219178440056	0.795081753534472	0.799289173879349	0.78674318261078	0.796610630183724	0.786981813528063
0.781662190983889	0.772400152601731	0.784200729987531	0.792491334170179	0.792839029304646	0.775668115950976	0.780664547332391	0.777170616088853	0.777389453005401	0.802815952471877	0.789130104501869	0.799019205163433	0.786346866096695	0.785334058206985	0.783368004139206	0.786573733243435	0.787731774296338	0.789591827592838	0.776868762698044	0.798864278984312	0.790581859395069	0.801820633262008	0.79671042121035	0.792017264180737	0.782641600109695	0.781189910084425	0.797431909379027	0.784731607130754	0.791386163772934	0.798194568483007	0.777223941920623	0.79005724782437	0.801037984616665	0.782481103725201	0.772740420421659	0.803168379866843	0.786281735787404	0.799789757306202	0.796150738576395	0.78664582206788	0.79286647872488	0.798046993043092	0.779518298814389	0.78524172865111	0.802088369064526	0.788083634619272	0.779561358412723	0.811782423293767	0.806878110675882	0.795542232539744
0.792798031365361	0.780898514015578	0.802127489462983	0.783385348319738	0.769772498208223	0.78390949838584	0.782400318810463	0.778572176408294	0.786846606907469	0.784660672120991	0.791676210141181	0.794713556732994	0.787213343002727	0.794375415077756	0.793067433029188	0.792258532966998	0.7973068939349	0.791066407510976	0.790100939217933	0.803444290566165	0.802893796681349	0.795103676774169	0.804410414271339	0.792504829845371	0.793234864631842	0.779699330642872	0.795571670741873	0.795750408270305	0.801023816419266	0.794196304452075	0.78350806393978	0.794647590741248	0.793644870264299	0.800824163017447	0.785970901666214	0.783244870730287	0.793816440719093	0.781518288478122	0.810886159861671	0.781306857916177	0.788608981850535	0.782537954154785	0.781585941983683	0.781395814506018	0.807319132820944	0.79668434336341	0.791989028674081	0.80018967792109	0.786225993738757	0.800040251784251
0.789207105357377	0.792916660300734	0.795156190326591	0.793471369482403	0.787369456267473	0.777426701725827	0.770327316345709	0.785515399840072	0.787537159088317	0.785039502557088	0.78473544885554	0.79127899337047	0.801665703533644	0.7940595813788	0.792279082767183	0.770654748414807	0.786440968748758	0.785018784996851	0.809616467617721	0.79723338202535	0.774899751696512	0.787924959230521	0.78724656291628	0.787147145347306	0.802035745499249	0.775981825988512	0.796927228151395	0.777916116355462	0.784178981058993	0.810612131018626	0.797214973315945	0.787603491990471	0.791350043796079	0.782817613301329	0.775690681608422	0.797344052041488	0.780725494642029	0.797403917895377	0.815420619216307	0.787582859535384	0.780465499547365	0.793589908527964	0.789583920908516	0.784837762402417	0.794127746568691	0.801399960170485	0.780086473217862	0.791690711243226	0.808115858637358	0.793939347247716
0.790382612659567	0.789574317169814	0.805429450914669	0.775072835033383	0.780233532955265	0.785007304591947	0.786664121597414	0.786203573277944	0.791042414860486	0.78087547957631	0.798941770769344	0.771540750607832	0.79290944807908	0.795353425693688	0.798702983214441	0.798201410543227	0.780413695294519	0.790624954110693	0.78258371610087	0.786531252271753	0.804332358966695	0.793144276234285	0.793145662980969	0.805410073060614	0.784581539497704	0.796381563985543	0.779838089724984	0.79977329039316	0.801238216551489	0.783883568842882	0.792548617993741	0.784111010331884	0.781589891344486	0.803504724292657	0.807210155236196	0.785959943067717	0.781137771620594	0.799164884954821	0.785652312722375	0.785974424378585	0.803690468846147	0.789111507560926	0.78567340823334	0.793540216869291	0.796433326171084	0.778691452773843	0.78901605250384	0.796525264267551	0.784053202749544	0.784564841194601
0.798364806559778	0.789019431575375	0.795345959522063	0.782083650832621	0.788521829876049	0.788637664450786	0.795612955707658	0.787455845697555	0.787059892837344	0.79196014919908	0.787926232096645	0.799568979876836	0.787958187788256	0.785069051397307	0.802815043073463	0.779716451405106	0.791652985255199	0.796551205538099	0.788264760699472	0.796603775367345	0.797260252496679	0.795568148376326	0.784902425210077	0.783798944718223	0.781052378629335	0.787722049328577	0.800467526632986	0.788389661138129	0.794827202946003	0.780664236737205	0.800867605807804	0.787496077274014	0.788878858514592	0.78730896772019	0.791459740906618	0.787172531232923	0.793112300934728	0.790348369160325	0.788227118797047	0.796457304208586	0.811482306219818	0.799857423607825	0.789978949405196	0.792246652636787	0.785039474065364	0.789173734558827	0.789321322934649	0.797535208060898	0.79105906196631	0.772295551497298
0.79237036435295	0.780571775880296	0.788661185335312	0.784102593324044	0.786841096891481	0.795251987175811	0.776462930460224	0.786086815198004	0.798061161806212	0.77318891128415	0.801761156125609	0.791862221488726	0.777859089006639	0.804621095742969	0.804749884826001	0.791988458488973	0.790718579199423	0.79501118652382	0.791995661620934	0.789411869303652	0.797921704442361	0.79859057632902	0.797190914405663	0.795950151575216	0.789949416710098	0.785717929802868	0.788558783524821	0.793933452431163	0.794944386604942	0.779728542056128	0.798677184904215	0.807967533996946	0.791394062153629	0.785435740973323	0.79477811257827	0.789339059075417	0.796863132324692	0.801240696596411	0.795133678521835	0.789554232019248	0.796446531134563	0.799595757445379	0.790583725363684	0.782521768523169	0.800864996208681	0.773319962466092	0.798464548027531	0.777980666282452	0.781310790688767	0.768568879992563
0.793657400632603	0.794307886158969	0.804453922608011	0.784069424615568	0.786931598912093	0.795411036108903	0.779645537884848	0.784199390727498	0.801900937283621	0.787887369076884	0.785060856243321	0.776446550678689	0.795714797177618	0.787170585813422	0.792611921920439	0.802721562870486	0.797205150544995	0.800131386645303	0.788444378952544	0.785419958284066	0.778954852997167	0.794100619389759	0.79754236850421	0.787021618412123	0.79017391494566	0.790143268393889	0.788282013413778	0.784384403003604	0.773527521907922	0.779353977427763	0.782701538120201	0.798730858738735	0.787476089667104	0.773667460173289	0.798029075245084	0.788433002634902	0.792114621304782	0.777848816097893	0.777317744587558	0.792967150384378	0.801265611623103	0.807039385105979	0.785904116754364	0.779010491736521	0.791235532847102	0.785831838880639	0.794972480180865	0.781691052612456	0.785742806743742	0.772546115082892
0.800472633627104	0.784797894864637	0.773933203981639	0.791932370422045	0.787866301360718	0.767615265196037	0.787083642229863	0.784620360395857	0.79200054005565	0.787300576789079	0.791408312636018	0.796898010492612	0.786296913451672	0.797539319683803	0.773116554342425	0.79909344741518	0.794889107436786	0.786485516903458	0.784249961383056	0.803227635143161	0.784305063399695	0.802533190425887	0.785686444999321	0.785808108582449	0.783438771641578	0.799356930006031	0.796172544272668	0.791585191222782	0.783259546057899	0.789424674813351	0.806665233440799	0.819083067730522	0.791687366851628	0.792066912614599	0.803324237802506	0.786201918101968	0.805006794373294	0.772301233419964	0.782958940769907	0.779586915186727	0.797945308219096	0.799050030162316	0.796656508512881	0.778169879862215	0.79215214011452	0.780154506015574	0.78920943117323	0.794262653501903	0.790336018615276	0.796650745395316
0.789677743235459	0.794142004161046	0.781624305600088	0.793723329881189	0.783123242841128	0.787682252034035	0.790657721509232	0.784162577365747	0.796824014027447	0.791470330004234	0.80127484575949	0.791881609177102	0.793713212598121	0.784573865329479	0.783890867778381	0.777684006230005	0.78716042522994	0.773041898236294	0.806935869149063	0.789938096356813	0.782727633918627	0.791884294246172	0.789972660518303	0.787198177993216	0.784524245386871	0.787646304140037	0.79164940797037	0.783677577801949	0.795509473944171	0.789985426612214	0.785985181590211	0.796771202470886	0.788505118887079	0.777948879089863	0.792327893166944	0.799310403841223	0.80245272725509	0.792835609058308	0.79761238066342	0.790188186133253	0.773519657561625	0.79176067873038	0.784075468108503	0.797683931341274	0.795820986877303	0.783462120383428	0.79637825242613	0.782476178804549	0.788145273770327	0.782812686396196
0.806667035430281	0.789427122525611	0.792392790034881	0.784687692544461	0.794360786424234	0.771894711901067	0.787144788927129	0.788603702016716	0.788180225256147	0.791010978360711	0.77899943459956	0.806008947635503	0.798410896006876	0.798773145231856	0.789429231898522	0.797793428374944	0.7830666985102	0.784813987004374	0.782394264052992	0.795055946648499	0.790912988354769	0.78652308287796	0.782077612524637	0.781586107538201	0.789463812561622	0.797277827872734	0.777759168454636	0.787207939875521	0.793829345155105	0.79274441039455	0.776690708474076	0.792720746738481	0.796765179217856	0.794647866949122	0.781658307578451	0.782184444123897	0.79280865608054	0.798790025048507	0.775656480425557	0.783975437519157	0.779766852644502	0.808448540697671	0.795117356856254	0.785006287793619	0.80054435940675	0.792906626181125	0.805560453023294	0.783943802391802	0.791471206717057	0.782378005999113
0.791408008043278	0.797751218123988	0.788314973865717	0.797034496258664	0.795148875759045	0.797542702804038	0.802596625471157	0.789677294881679	0.793484420712931	0.789816457729027	0.789391992783189	0.796547141692736	0.786862523043558	0.776364797086513	0.783522393689276	0.800097727815595	0.783710095928072	0.781855969158134	0.789759870395516	0.786454377009615	0.781887793081367	0.793291679225163	0.778262652434215	0.78474176421542	0.799399963346499	0.78562160154691	0.801265766948818	0.792559476995075	0.792992269639276	0.781059231462389	0.776691674349303	0.797481891347863	0.795219509111341	0.781111609954052	0.800517263745178	0.774673680855768	0.791498217002119	0.783469680641457	0.786302897908346	0.766970628739995	0.778361927598792	0.784373392332066	0.795520639567684	0.780105003889351	0.788361410249631	0.782439494090091	0.790170415214077	0.802010419163858	0.800534613174959	0.791840992980232
0.775783178185108	0.782492417351654	0.785326906146193	0.789686180628397	0.774596397762771	0.797796896934075	0.803392945976835	0.793024388401244	0.797285957150364	0.795081860797003	0.787066735361375	0.783802063889665	0.797737802807186	0.795196063029715	0.789307300424362	0.78099208611198	0.786454512648808	0.785122828406522	0.791326830071428	0.784531069597334	0.788176545249615	0.796252387153734	0.801957748641267	0.786041820730679	0.772156863698435	0.783121085773991	0.80217499444029	0.79336139440727	0.789779810808512	0.798742122715453	0.803908935398037	0.779357458400286	0.794779918425575	0.785627034370735	0.793009655417082	0.803556205691151	0.785505874061523	0.802748486419307	0.795045123451721	0.781090554687449	0.792824397164097	0.798405196853395	0.796865049788165	0.784908450065858	0.797070608454644	0.791091504468153	0.797187645872438	0.779093341855573	0.811480039245012	0.780507713095551
0.780256881458033	0.789661521108525	0.791152860016609	0.786552902660446	0.791396016896214	0.778244459113699	0.799727659380939	0.776741705480685	0.777722704054204	0.800016687407962	0.785139448619341	0.808443523099841	0.772199317306202	0.794011265589824	0.799297578679936	0.788009868953099	0.795453549180935	0.791708185267495	0.789778417494667	0.794876965890064	0.791479011120907	0.789189034918515	0.787673305274672	0.787250411409317	0.788364958533299	0.78890163315006	0.798046170224256	0.796902404783274	0.785462114553035	0.784813431245955	0.795618135966359	0.79261583864772	0.788814648951835	0.794818432257585	0.793044172343821	0.791948588954452	0.808202956336683	0.796536640661475	0.796856773194743	0.775131050450843	0.788992748648825	0.785619354934043	0.78193467876406	0.783720332829371	0.794620495639134	0.799822578477652	0.76506914131273	0.791158958554795	0.7950344967812	0.789626360913997
0.791647314194559	0.791995880084464	0.787609993820221	0.779290779496826	0.78735962981326	0.78410018729211	0.787229072664621	0.784709446623928	0.797004914662679	0.792294423747105	0.801753559612806	0.781430996771275	0.783713353447585	0.806300421619223	0.791667598015727	0.789165033659471	0.792357468383319	0.789771277677612	0.76891399164462	0.815256579928969	0.804522718274579	0.792026285715344	0.79152548686228	0.794665240715636	0.786608366224152	0.805581535845317	0.801349915967059	0.786134649699151	0.786641670750659	0.78761269534016	0.775123728164525	0.799697273563632	0.788911989826417	0.777958436333052	0.780151388562274	0.791096095730823	0.782479974101548	0.792845719309071	0.775177095242621	0.79548964189159	0.789378772385129	0.786904781187491	0.781353551543033	0.786854600415674	0.775082761018062	0.778862723720479	0.797272160806039	0.788390347633538	0.785944081187724	0.787014574154395
0.802173446120822	0.783736972972807	0.786450985350461	0.767918234838563	0.7945753070465	0.798962235356482	0.791496357975878	0.796473972798395	0.796726848979359	0.785787338316668	0.786061175266825	0.796761429813384	0.778933831935664	0.794328011671361	0.783026090866446	0.787118900495296	0.782815303876323	0.793439482178055	0.785175887782979	0.780451354808047	0.7748940917578	0.794859485087205	0.785640166899458	0.781319440693602	0.790480925636806	0.785020223662377	0.785241594713378	0.785117706284132	0.786335942083383	0.793896897944118	0.788454708839882	0.781676442143065	0.783744213491713	0.769652216613151	0.792181316790877	0.795511992133897	0.787104127307243	0.789892475869327	0.778835186898962	0.788361212907906	0.790730673503947	0.760578919997087	0.795707039836051	0.79051331319881	0.790635274624047	0.792191256522928	0.792439616808467	0.787136442232459	0.79449007364278	0.801244212110513
0.795828704694711	0.789874090132978	0.797962698054764	0.777553683034867	0.776227737358677	0.78708428078156	0.771960594014482	0.781094310644902	0.786013997024985	0.78878657031053	0.788409580962625	0.812036776097828	0.780980155694921	0.803908251073794	0.79721725050209	0.790478753791216	0.798936395412904	0.800396411151113	0.789856014123943	0.793051796125041	0.774100781363826	0.793630497484569	0.784067487543812	0.790508213837021	0.788704261783135	0.780562309953867	0.787926827596642	0.787752031233524	0.784268850535001	0.788867916565464	0.790144116714066	0.783442218029817	0.780539386340878	0.780051710634826	0.796133811521858	0.775797875173992	0.784826896500796	0.768681361596722	0.785878155043493	0.775779158333901	0.795638089015612	0.780512830186423	0.7877215742233	0.782498143348157	0.798688727751017	0.77719058000833	0.785695909910014	0.788612928021934	0.792284860318374	0.799112232593505
0.794613353675632	0.772871322941143	0.793733055805177	0.787751474682073	0.794723259254123	0.799904399444795	0.789141731093195	0.797640624095361	0.800787145031105	0.795972558778561	0.780885593373963	0.78774947806001	0.791507413020531	0.79144704003688	0.782427870113239	0.764339770821467	0.794767278149492	0.79430806142674	0.78429147776443	0.775160928941157	0.79347983038164	0.783229978473277	0.785834931236314	0.786666807553014	0.784252155206021	0.785212927624456	0.77241964152695	0.803982826466097	0.780956479556309	0.790868241823555	0.788346796554041	0.791765726342235	0.803507818289386	0.791713390863515	0.788573539523423	0.792875356723704	0.783471537300858	0.787888035223944	0.792772758024905	0.793049680433357	0.784800945482656	0.798040260516744	0.779197359997986	0.773209666978203	0.79691062041843	0.794720341646286	0.792017927513781	0.783034245697117	0.797015915237673	0.774141767976326
0.79185814727065	0.805207804319391	0.790131873255834	0.793895807616988	0.776722050014465	0.78508280854483	0.787881965896855	0.790996761379352	0.793544264552688	0.780350202462696	0.788783481198562	0.79428708521404	0.795517159766852	0.799095165111923	0.796278309236833	0.787973188609827	0.789220751511889	0.786058349432824	0.770797195879628	0.796286644425599	0.794763339702105	0.780125624460694	0.784093286255859	0.779215837635268	0.782926320283287	0.791817081157044	0.788888687147765	0.781918995851292	0.777446668014405	0.792136272644952	0.800289984897386	0.787098994553197	0.79345533191078	0.778763079842776	0.782424342075205	0.779649774620979	0.77313690534688	0.79350825562708	0.775359450792824	0.778713869262082	0.811176228666835	0.779102941335128	0.788829049071719	0.785010525935639	0.797750519560294	0.804114354460828	0.798195609933427	0.777623482725847	0.79379565456868	0.79620179789117
0.789658236656248	0.771961251419263	0.786956596385235	0.801743759392555	0.785233646539208	0.787796123567325	0.78374825746945	0.784793236074883	0.796328559090847	0.790006269852795	0.786714316475846	0.785729844298832	0.791987397267743	0.792850080357418	0.792731918331553	0.792742313959998	0.793910925902002	0.781368124253122	0.795698915555219	0.795033876739253	0.802148001543029	0.791039148250274	0.790240266741164	0.786052534711757	0.775878863498013	0.789984330918232	0.783949464865351	0.806447465862999	0.774752087384727	0.782067230979417	0.783264389422079	0.785929788099211	0.769997988313457	0.776081097407401	0.802327683922482	0.788137550986367	0.790308661095518	0.794714155259902	0.783538293852089	0.788523440983117	0.784438203365008	0.780413318732951	0.788863937465572	0.798309831688487	0.791594727154233	0.803686789301057	0.793619106982734	0.793780264521781	0.799108069232049	0.795765431174199
0.782226699042827	0.790513644572822	0.784115635497144	0.776486702876379	0.795222772329599	0.793804870695939	0.786329574014164	0.788228638213598	0.784947908202652	0.782254581339602	0.791344900417497	0.77960835157211	0.78425306791346	0.795985292878179	0.788049995006251	0.781603311985022	0.802329913343679	0.776440178913184	0.776754191600639	0.77989549670575	0.778690206954622	0.792785345199373	0.78312765036742	0.777117603285197	0.792202134985309	0.78610814093829	0.777986834067217	0.786509697060567	0.798551651643008	0.800576923850405	0.7774007687724	0.787721361485025	0.785961306090214	0.796617249650206	0.798824106896274	0.786216353773268	0.805337605938072	0.796311471086075	0.797164023781756	0.792143026098284	0.783139850943561	0.780261731204595	0.795573900439809	0.777785327538123	0.787626941712092	0.79396595637888	0.79526073922677	0.791798188129053	0.794364829386214	0.790179588010556
0.795391328771702	0.7858174219535	0.797449905811541	0.775543154658367	0.780142321289253	0.782274574184536	0.781799652473695	0.789039990482356	0.795069273599511	0.784490579881784	0.798984710577407	0.791833271398901	0.79285233065763	0.800286388936574	0.769409983895552	0.787892077467699	0.788279060831212	0.78795532895425	0.78448456895708	0.792532015513082	0.780612130902893	0.786414752844305	0.777691369799479	0.780494228570303	0.788786804093886	0.784321358286955	0.795420776049776	0.786213666014998	0.780535231917643	0.768884193066928	0.798585818664917	0.80045973106252	0.78799965890429	0.795899215641552	0.799186673040346	0.782340480691136	0.786290222623586	0.785786458514065	0.788177611480657	0.777866628335222	0.793358852727514	0.793216126863404	0.788635388202316	0.778343376733189	0.793545351583616	0.780671085672052	0.787183499677045	0.796443968649225	0.789334907014234	0.790247420509094
0.787468306158285	0.796894436788194	0.781286727156929	0.787157296381981	0.79991089565612	0.78833737708266	0.781573250831826	0.793197860542932	0.783375060010991	0.780621184798626	0.786814020743827	0.786822065203466	0.786285017173603	0.796444634790196	0.777317685331801	0.782038124128638	0.802842766813671	0.789999557265104	0.782293709947808	0.775090649219874	0.768951080012043	0.790679769840392	0.785309385647714	0.788655533701792	0.7891467502897	0.76734152781299	0.779437406834163	0.790234220752765	0.797303879239839	0.783369188468886	0.786221541363592	0.794810927553003	0.777851864180244	0.789690974354452	0.772251952330294	0.763686684110638	0.788252669294767	0.788291257617518	0.782262877324173	0.799553015826988	0.789207637735067	0.782180515675171	0.797464129407175	0.803475808070895	0.789068429668211	0.778605305395494	0.788238119251937	0.797810934951184	0.790142786625199	0.77031679854097
0.783270451738538	0.786537026428078	0.783465384319501	0.79065163475766	0.774456264271043	0.77811827275795	0.803534343593337	0.79418633281212	0.801175379027957	0.796226820705323	0.777675186881724	0.775763507039143	0.778138183159302	0.781553406598741	0.781834395640865	0.794452579945615	0.78269979503104	0.804201570577607	0.781912593593717	0.792741213742477	0.795850951173456	0.773851201692816	0.787010441679347	0.781506345841818	0.776117259276764	0.777676172295977	0.790716830771816	0.787638681879383	0.780277582813006	0.778349675833908	0.789765782001998	0.779909156515073	0.797739698435303	0.781663769552134	0.773286500930385	0.772642741973203	0.784848636604723	0.785748137242779	0.788549291347603	0.771890504387509	0.78245898836727	0.774037058658972	0.789702238880592	0.786110248421108	0.79501630997155	0.787610886231594	0.785078673996971	0.775752034229465	0.789701573100315	0.799722605976711
0.806963183481386	0.776668444917419	0.77450101846744	0.786212702908619	0.775463522225627	0.78804965408034	0.78608664917174	0.785633116439503	0.779803496165702	0.783533484605446	0.801227036166797	0.787345663664383	0.798694701741984	0.775043409111718	0.79698673858959	0.778741491844445	0.786879412809203	0.781016983399563	0.784496657587531	0.786198528349716	0.789800234644486	0.794736993506736	0.779229566986779	0.771871030419666	0.773439759340589	0.791338759462747	0.773940320374343	0.795509408958609	0.802006247757541	0.791027959370058	0.789774382715049	0.791610294484455	0.783214215266812	0.780951846865465	0.791651123064089	0.800108769570523	0.803893947833715	0.790107525915551	0.792276839197434	0.785442729293845	0.781770639211338	0.788683518086818	0.784328553898834	0.778819335026018	0.782448970186653	0.7964824551867	0.809362943460453	0.790714640262371	0.799101731577268	0.780155319318187
0.784690858619316	0.781258367177295	0.775686690092402	0.783788599701269	0.790803584599865	0.780133816977421	0.796320399877592	0.797465547055736	0.797739491710288	0.806551597849342	0.786666661163914	0.787945509233005	0.779808137856114	0.791339801898778	0.785782919992479	0.779119586499013	0.793427163998144	0.779480627064397	0.782227484285194	0.786933470453577	0.788135954387727	0.769778512106452	0.798495400249276	0.788512000652213	0.7954481866858	0.792098716314225	0.776063932984694	0.797576242992055	0.780733666455532	0.779475487506469	0.785867689612552	0.77837960318076	0.786239543385901	0.79004823686319	0.795360896625702	0.774923047828378	0.772355346468563	0.788741456017688	0.795958238116718	0.783937562788379	0.787471973430854	0.800359880048562	0.778384390913611	0.770677447082673	0.782572632897502	0.776741772090944	0.797602270906727	0.796994463119064	0.793115479600212	0.773638966459986
0.784280450597147	0.791300399296173	0.785432977625324	0.788541713826598	0.778713978922284	0.777000735348682	0.77171427845411	0.785412468924984	0.777063257257435	0.786681216348915	0.780909300966351	0.78871770980632	0.777208160101358	0.783729654594138	0.797854860760338	0.779656156327313	0.797227870483007	0.786175354413873	0.784931129734076	0.778386882049256	0.761928853794319	0.78829354319758	0.776590857116446	0.793022912120947	0.803224501486271	0.78453125440869	0.783200231547228	0.799739845984416	0.782512452692087	0.779092869395157	0.788817277026854	0.794702544231253	0.782413761559386	0.792258138133214	0.77567836534799	0.780968850390102	0.785275831543089	0.775046060309683	0.78628337073242	0.782359817897425	0.794282612449262	0.790119937308207	0.808167883739943	0.786818227438546	0.775957994451225	0.799134110352081	0.788515507540738	0.790920319764652	0.803505961237719	0.789317518720015
0.776329321702185	0.799739795254072	0.775970499300243	0.797469384580377	0.781825619805515	0.788126257410745	0.777637986056437	0.788379605866798	0.7831869545638	0.787436790405103	0.785750748348288	0.792449408497135	0.786461357126128	0.783515165134799	0.784439841252103	0.787903057196931	0.785643267747661	0.782830880543687	0.782106498895112	0.782111542039008	0.795891755177147	0.77954019647093	0.788079137260323	0.783239631925318	0.796576085549142	0.784063821117098	0.78794454438589	0.784018793171156	0.777484049633869	0.77705956431995	0.787644115133085	0.790416038136376	0.787868156253503	0.790249835718172	0.788700966212665	0.799649949135858	0.792729522464033	0.791149552054932	0.797946597021155	0.791007763245339	0.795681325641941	0.780221474955798	0.795916194313019	0.789810134516876	0.794816437231148	0.791671969768176	0.788017783654159	0.778869596589124	0.78458723465638	0.77579069565564
0.776222704265788	0.791476808690337	0.782556815038267	0.786712956034307	0.793327041793133	0.773515523690557	0.790810275729751	0.784171233317695	0.785707517058411	0.784980716497005	0.784419643155022	0.778476269639202	0.774906636494414	0.786491295750929	0.794293232108617	0.780979816331687	0.776565445583232	0.793626443183921	0.791431990789657	0.773010779778506	0.786241883673563	0.782019286757241	0.778319692932309	0.782571359105589	0.778535782496293	0.78478257791047	0.790735155094147	0.777118690554995	0.774644808467411	0.783238125718274	0.794466983251028	0.778040700196583	0.779579686634349	0.767649836258438	0.784983697205144	0.791978813441676	0.775391733503296	0.775272669680204	0.795289468215935	0.778481628178109	0.795270488001201	0.77886488158433	0.789150890269129	0.782323041269189	0.774249898200569	0.792996151084715	0.797217367378453	0.773396813925454	0.783124544327098	0.779210484005125
0.79778385783058	0.786878498332084	0.793264188263025	0.78494312920538	0.784592289129794	0.781974475021446	0.777855908598228	0.800720949644906	0.792519887041872	0.789781975872053	0.776224413573046	0.77780789637201	0.781873399491763	0.793744260812219	0.792868616839101	0.789602444976583	0.780380400973413	0.78476547955747	0.785100434664823	0.776660222239317	0.774521139350065	0.792919553220898	0.791593333474066	0.782859539668873	0.782842407244257	0.792810797273707	0.79085230348243	0.791239162512926	0.799264290093599	0.787362354488308	0.789233278794085	0.793059043226213	0.792094983677262	0.805429937512567	0.806269505483836	0.785534899646491	0.782874430816968	0.798018097447635	0.781572151785692	0.789250648363792	0.792362109686344	0.788644447850925	0.795956848910911	0.797989166454734	0.790349084812845	0.773127300241156	0.78668395280603	0.78791393153669	0.782824804083825	0.797276219968093
0.785945633421069	0.773064083153542	0.777537665563452	0.795226212991909	0.787590866043807	0.775528573778274	0.793554538908018	0.800764249583112	0.801545456707989	0.777593049943303	0.774243941455877	0.778938053438646	0.783764664370757	0.780212806887172	0.79478756978787	0.790775611550622	0.773971361522677	0.770537751417652	0.783263072334992	0.785597618926429	0.76838054307527	0.795393942112742	0.784387701403044	0.788819503254443	0.803638230303551	0.795240287042905	0.789588354492104	0.766912843569539	0.795394089909322	0.779202447984371	0.77582046976421	0.773164382466354	0.777068170271963	0.785631600576146	0.791262743052286	0.805294673060152	0.780223869478872	0.791922286985759	0.78619555401703	0.778696529627898	0.783365753116035	0.775366305915506	0.797979325487377	0.783790500966733	0.798204150831288	0.782800976968383	0.798227419972829	0.777389394953525	0.773170212006935	0.786815952585961
0.791528158858705	0.782603489604213	0.785628767636299	0.767023133404204	0.789205314358569	0.794639608015408	0.783836847737514	0.781953260378142	0.798725179578961	0.78281275848112	0.785704200492595	0.779670735443382	0.780538514896252	0.778260900205384	0.799822755241228	0.788689060784427	0.788387862550003	0.789030218961719	0.804496772605525	0.772523563547192	0.776369795429468	0.807785812407509	0.797288106291985	0.785103381712972	0.791615283771616	0.784568477471792	0.791192562846367	0.783167317532878	0.785560809896226	0.780536213913466	0.781540814822388	0.778307867102256	0.786234488555204	0.785638464207746	0.792184569875225	0.786012569977789	0.774285098843828	0.797824439242024	0.783633572083724	0.782141609038132	0.767273559744403	0.778574149146727	0.801697812718752	0.792308155078867	0.79183754192097	0.78597340485554	0.791729759881487	0.781216206995939	0.79225341278389	0.787103218280346
0.775616594308549	0.785587915223912	0.796765889119716	0.787825898922148	0.772847459058523	0.780818784138886	0.777415475772962	0.787798024046066	0.799611855875565	0.777163710313076	0.783642652278878	0.791410016960503	0.787635314087434	0.787646936463241	0.776663386930506	0.795100944201271	0.775946274894984	0.805615764215645	0.786540363697638	0.792576214228144	0.797281670792336	0.790700551598149	0.794530889795469	0.775143268404578	0.794420337103534	0.780816715117983	0.799230687120419	0.79390071166321	0.774563331738592	0.783536164602216	0.795915257600125	0.783364226748728	0.784795718577829	0.795483287882689	0.783298324314621	0.767652055173972	0.783815746053258	0.780666690050284	0.778079849411021	0.792107467755312	0.778135491658328	0.783826719227594	0.800925285278395	0.781640623022505	0.780446015582189	0.792974988737052	0.779902020200289	0.796132642156701	0.786864245857239	0.789645889805146
0.786366822298232	0.780685221561991	0.777149544236612	0.791758061925207	0.779953344196025	0.784746550592946	0.78613646079006	0.7734533060215	0.785041785185581	0.779638485624309	0.786481255034028	0.791484389889255	0.770978642662833	0.782162314147648	0.790802072630407	0.79550691229591	0.794669182671329	0.773979530803014	0.782970736769076	0.790815387013864	0.795423683212218	0.780306052413763	0.777706281364269	0.790517180579307	0.791956971707152	0.782358369258407	0.78965578776124	0.792826679303983	0.783710473215458	0.781719061058652	0.795041088799275	0.804280471949377	0.763681318000778	0.76608571213723	0.78056779538904	0.802596166890784	0.783653382249617	0.773767443502254	0.804184161999674	0.790613108467823	0.782741107682132	0.77595129292269	0.790526943584218	0.769996632117471	0.77815565784616	0.80444642793569	0.772942435410302	0.784054339137123	0.777630427642787	0.776837902353837
0.775882571726296	0.774356469191599	0.777295916711515	0.776683774139493	0.793822248852685	0.775240269005883	0.774599037005998	0.783222429254139	0.76897528248601	0.788087930257979	0.777945848616288	0.793613200418691	0.78712997390582	0.768525572114823	0.791061222178333	0.797153913660396	0.788881728457013	0.784036234906205	0.795602347999804	0.784865545844663	0.789407889870666	0.782763902050557	0.78354443687274	0.774351950978164	0.786429427800644	0.778902021686388	0.786112683654292	0.797856221592404	0.788202845608623	0.799553887179585	0.783082363049974	0.794383905379308	0.79566965488221	0.79497241374761	0.787963821128182	0.776831779040372	0.775769187683107	0.773656158947218	0.801220296658545	0.794450074551272	0.776998884313132	0.772116093436667	0.776638990167931	0.771170146131569	0.790817598322633	0.779319022613528	0.787253657959262	0.788726679857166	0.775068264644145	0.792362226410059
0.783922303597377	0.783729677576255	0.784902134942066	0.781091190865335	0.790806805345321	0.792316155908444	0.789416221464323	0.790136427321262	0.785538286788252	0.787288551188476	0.794904227188035	0.798402708025412	0.798262138631086	0.787793941742298	0.785514839714495	0.788612378316947	0.791966163540772	0.791161922138265	0.78423049534666	0.766707313151219	0.7882243401429	0.785567277123174	0.775427238446247	0.79320437568535	0.783000338163544	0.783118021059349	0.785254664442967	0.78129390747432	0.80362724985836	0.77890288879717	0.794497377139832	0.774251382563652	0.780919790191788	0.789621323884581	0.797102149458602	0.795583616805172	0.776102189668385	0.790894567043635	0.787614648840714	0.793140387864965	0.779203858411841	0.786388360190335	0.788663959225735	0.782199463496012	0.780118229079509	0.779125382490871	0.794905684235536	0.808768587017355	0.815737324670604	0.775102954461667
0.770206742512595	0.769002399740415	0.794570800593305	0.800766678816399	0.775847104815654	0.77860759909357	0.787538517200432	0.780631711407708	0.788743478702791	0.789865439840489	0.775004525335549	0.775197957379229	0.795831080304395	0.777144077479322	0.801322906496415	0.794723300064643	0.797613691169487	0.768890998984147	0.778500305483717	0.779492693362823	0.799496556671977	0.779063360622761	0.782774497118556	0.785844151843176	0.790621375130687	0.794426876819403	0.8042802527301	0.792155931493315	0.781861534184122	0.790642260186648	0.782796638293525	0.803582167668534	0.766533196556099	0.792875535812141	0.792500091342666	0.798702707840781	0.778543376768542	0.778813368151729	0.78275001853916	0.796618688202432	0.797387303416954	0.783243650564623	0.791162059870597	0.789022414649311	0.77684079579891	0.793896220440456	0.778753748597241	0.771404797814401	0.769649904572838	0.803729135155207
0.795196663249326	0.784996094021621	0.763865006053228	0.778777232691615	0.790127913467301	0.795441172676128	0.768222694572756	0.780544217978638	0.79361314728702	0.776484751692728	0.776248541155468	0.790797320472375	0.797183722205952	0.784828834253946	0.781121232465244	0.785519663679175	0.787157676072969	0.788892199706162	0.774296133784749	0.787659750937768	0.783604040791836	0.786334135841839	0.78943549128686	0.784708637799051	0.791523815160314	0.789266214304749	0.780160698364515	0.782517526890493	0.787627873618868	0.785218523813798	0.784089402161205	0.797733656537109	0.784379814866695	0.791542180544751	0.789389664435469	0.7814845420316	0.775575833664536	0.802325736528853	0.79027792489335	0.798283798646236	0.776784724873436	0.788415004503671	0.803710714874167	0.787733595325974	0.802136595598473	0.779730997972405	0.803192070353517	0.790439778926726	0.770799308343094	0.7890270940587
0.80964828148202	0.773835856122581	0.794389352473124	0.784648108034265	0.796435920780861	0.789437518760483	0.789040859220065	0.766273822758147	0.776037292278849	0.791001735305796	0.772801099860711	0.796417822295912	0.787812530583852	0.79333837257165	0.788911152746057	0.7871487590932	0.791209024055018	0.795116399930099	0.797041992291347	0.772810821950991	0.775525105388875	0.796477517905517	0.79385350107352	0.77323825318333	0.78152462771164	0.777902843315076	0.784812605892674	0.799447719915373	0.782002227944795	0.762973932773825	0.793213373998645	0.798429709527566	0.787909949962305	0.774643697927168	0.788588943272645	0.801405682167721	0.79249711517807	0.786477709255147	0.795227906868079	0.783893037541016	0.782437215013112	0.770936205472865	0.800649969220106	0.797481795237613	0.770544004414181	0.785206807570459	0.792523244326589	0.797295536321648	0.784319357623374	0.789790791567459
0.79092963043698	0.775237116887194	0.772907183192517	0.778904769297871	0.787081796985588	0.790052225855525	0.784146043682307	0.792818870172764	0.784926832679165	0.775135296806182	0.797021835526971	0.794109737815302	0.793280631418109	0.770402148504638	0.790673438314625	0.789252596304239	0.775379359118488	0.793620129832416	0.778673930282846	0.791964451784473	0.773330335741794	0.783820360928202	0.789544802566286	0.783847559571529	0.779279199904613	0.78863801231004	0.780643815935885	0.772757011357196	0.780231685036417	0.793281338749633	0.777574221541438	0.784595236433216	0.7876319595349	0.792110524067459	0.793426164426291	0.794103990197791	0.784062858492126	0.781841127595189	0.785746980146361	0.796430145874378	0.783663491524139	0.780691783252573	0.790502870950383	0.777813500183398	0.787207104458375	0.774867669147218	0.771689063528679	0.793628888924041	0.775892414994608	0.78260696511003
0.788404771172554	0.786847028368764	0.802509920355211	0.779173621347262	0.781526207905627	0.769068315710783	0.778685930573885	0.770896366518783	0.778928434811621	0.789617731915147	0.797249998186318	0.785512522822866	0.790336363058807	0.792655958917653	0.783806681373479	0.790220145055204	0.783995920308595	0.785927039896921	0.79535655550603	0.776634896803636	0.773246026760031	0.789032612551176	0.777724940783947	0.793750364686945	0.78279065083421	0.78056378979484	0.783928108931109	0.776136419385888	0.790744000244686	0.773950686707741	0.799280588693499	0.781196155160378	0.774754485748977	0.791299366096442	0.792747337404405	0.781005015084511	0.795344421263484	0.791266350263301	0.793357302838226	0.782097171162498	0.784374902197338	0.791620755392344	0.786395894132617	0.7825750865818	0.78449106225416	0.773518254233748	0.782030353551117	0.777313315646953	0.784684226825524	0.796040653428122
0.769052694504564	0.789493233219379	0.799094440728873	0.792233055795216	0.778908434034945	0.787870676614	0.772379215012035	0.792116833792049	0.767898782800975	0.788513533987004	0.78836908097037	0.789546738407392	0.786354348861373	0.781999922427323	0.790018275229128	0.776129544863829	0.781854629129229	0.785084679613539	0.78117094792244	0.79054528062324	0.776239225337295	0.779243804312172	0.782742848083074	0.791101873625478	0.77132331236174	0.782534560286372	0.789628390863517	0.791486960005156	0.777131845744823	0.790641256716055	0.798365136210911	0.789642208261818	0.784485785360234	0.793517388750943	0.795774156653296	0.771193664712426	0.794953008357199	0.785768327994549	0.784197766873849	0.774762721630293	0.787768492585841	0.781268668935318	0.786043968937684	0.775798157080842	0.786369052222966	0.778694837199649	0.79254963266542	0.777997373386297	0.786328714059582	0.782125920334966
0.786432270749051	0.782705284607775	0.759766190308123	0.779038047890982	0.790146507764603	0.796808301899086	0.781166101380014	0.777293672250692	0.788045784200742	0.777065853202357	0.790727792255018	0.788533656178596	0.787843434939269	0.792304320206638	0.801860870194319	0.782824333844718	0.765160465313611	0.795020708783474	0.790402708321346	0.792651564493939	0.798546111146838	0.794134909229492	0.790784160763808	0.768708502979881	0.787829856444328	0.776339797051904	0.778046025520745	0.778724641401615	0.78315620461242	0.792176455162474	0.779663029860493	0.783421562998993	0.771485123068943	0.7919300569148	0.792320205298106	0.783322654662584	0.787984818511427	0.77821069408237	0.783556344808189	0.797022635134826	0.790442252773714	0.784207278434557	0.767898794958043	0.785586554991475	0.796504861660701	0.771508188973133	0.799253551015416	0.785646706936257	0.806581702347486	0.7843168936361
0.789630215626177	0.788838696533783	0.783599168930695	0.779917934654551	0.780326811012699	0.78418314692628	0.784279945913904	0.79794238365085	0.790204505568038	0.76962502102708	0.783262289311105	0.780430938955527	0.773720899453919	0.777879269050711	0.787675333033981	0.798245984965745	0.784425980112987	0.782780897297566	0.796136664753178	0.778187919019084	0.779286498166466	0.802687879802364	0.784915330161514	0.796006645024124	0.783069551885309	0.773139082877342	0.779167850585774	0.778311370849081	0.800250582471768	0.788235040822911	0.791919944278184	0.769796570851738	0.786056434506576	0.777751666008012	0.793100883078231	0.783334536626727	0.786926704708741	0.799370891954865	0.770594955423461	0.776414814058205	0.784216849418236	0.789430632326148	0.78285080723724	0.78377856341099	0.784122551608347	0.794249697003369	0.779765329560677	0.779915293265353	0.788169769000553	0.786735033063459
0.789266622141175	0.776986283729819	0.773288463005358	0.790559207215165	0.78720705120836	0.789936756729515	0.792596803954856	0.791362261580232	0.779921838023683	0.784028385566837	0.775646779892134	0.791889166529307	0.789694175156519	0.792925093616992	0.781244133761441	0.784062939231724	0.794604369758302	0.774864402006995	0.781740988729847	0.77523709497953	0.783403409980634	0.788333261613938	0.796382307058566	0.77164394150145	0.776046341399953	0.784109764763917	0.776434757653261	0.786256592025279	0.786984303426899	0.792224174675396	0.793540747972569	0.789771422870677	0.788894384756914	0.784940541388021	0.786050716889882	0.77799144634423	0.780070647106607	0.787819464907102	0.784246383823702	0.784095278430879	0.786216545949509	0.77574277735255	0.800759720446082	0.770702931149344	0.785653909159441	0.777136370223438	0.776562497583111	0.797133293735695	0.785605706805201	0.775000493881513
0.77794215203975	0.790224693183658	0.768651636753309	0.781202516540321	0.783183147634755	0.790671722319966	0.782560526564659	0.776608182509177	0.774387168780113	0.777653222930307	0.788699378331034	0.779669051029478	0.768850057561702	0.773979206627773	0.795855225047629	0.790122079848465	0.79024567820995	0.786914505389813	0.790201128381208	0.780692400302262	0.791847025921214	0.780126548995876	0.787324040857296	0.777332842774642	0.785874720887212	0.780488613831084	0.792751947636971	0.786374818374787	0.780556786792772	0.795079522678015	0.808632023467371	0.772478547742396	0.77591080363231	0.786760328938615	0.797354330293067	0.777704197301006	0.776544527401022	0.796745832679525	0.796481584878461	0.776137908555626	0.7811973300022	0.788713934220183	0.797520357411883	0.779065481235636	0.783473412894172	0.780784821383798	0.792032545061436	0.780542725959313	0.789376495752837	0.789200808302439
0.777407712387799	0.76699919874533	0.775832568174858	0.788438509900922	0.786992416633603	0.768043557700684	0.779704248765585	0.772925772931507	0.796567141739594	0.77725094061404	0.800552028042434	0.782882242675638	0.807536942776628	0.788572082001751	0.789407378126261	0.792544314627275	0.777333417568637	0.77521474032028	0.781644572542493	0.779452454267799	0.780337364655893	0.793083484131305	0.788660266578209	0.781236729966536	0.789852332292067	0.79702161272795	0.789279551790644	0.784669603130452	0.780976918575589	0.785851836083326	0.774276873881721	0.79522277923345	0.780822869187133	0.788033132520588	0.782477167878102	0.785098760047668	0.793670200608744	0.774245121793208	0.784352260958932	0.787923921201777	0.789847976061138	0.782239737539486	0.78513981772855	0.787895758312675	0.791374448924698	0.771739256810936	0.775549589445312	0.781275702972994	0.76880979702766	0.786169301477551
0.787208924563186	0.771675485100835	0.777274240401832	0.787061089528827	0.789054766744774	0.778171520526072	0.782726786529937	0.784454166505147	0.789639694596094	0.777752706262527	0.791422379914168	0.793487937817809	0.790419215552452	0.79543009892186	0.798096785038659	0.7897762768069	0.790421639359509	0.772439339093838	0.791551747812901	0.788888505345909	0.793775173750964	0.77623907617696	0.769840551891359	0.781101352650851	0.779494494282298	0.7767332155389	0.769227710369759	0.767137170030207	0.779231010958415	0.785725784551414	0.783420429989579	0.799294300470121	0.785038378294169	0.763051952222671	0.798144179486127	0.803447915694955	0.777115193467486	0.783267001840178	0.788823071018821	0.795469538086198	0.803258027545538	0.784481941075567	0.794277926310123	0.799269097311477	0.780922434608924	0.774270671943856	0.792282680654272	0.797876847614967	0.781970340837585	0.782821598145646
0.79116477572773	0.760541597414575	0.78936197239529	0.785857009603925	0.788314420347323	0.786122597176917	0.794790071694613	0.771609509498396	0.767955053076829	0.791123463187308	0.792780118483512	0.808047422437993	0.770048443494767	0.792240982130952	0.778595375762976	0.77930936543294	0.796320771981466	0.781960529377353	0.787954454889344	0.775613833374519	0.791217013922947	0.767564380238879	0.774400856308299	0.790386768174596	0.793127217947175	0.7896111704468	0.78532223236021	0.786529268376539	0.798558863471195	0.781714580317364	0.775154015827483	0.786041973005323	0.782677821855223	0.805785939244303	0.783075611004217	0.773010486258636	0.786336263778145	0.787426640165783	0.778620902264506	0.789471937736481	0.79739176102196	0.775187266927175	0.778091500969255	0.7831729790604	0.803097273645298	0.784018208162939	0.801217698508505	0.775171743674064	0.802337678039545	0.791896871157798
0.778863236876047	0.78347390115919	0.785477572033421	0.775653012996512	0.780205454801569	0.789375856716372	0.763905582267992	0.784431321788843	0.767300912614551	0.795153979176284	0.770964521998335	0.783683326732476	0.779160090656436	0.789824052343977	0.770214364115322	0.784247235786869	0.785656959827169	0.772607984404074	0.791052688668963	0.768769058716023	0.792651032158389	0.794458313090099	0.77674637949506	0.801489642477289	0.794071256497169	0.787342809658067	0.779618417800222	0.781511834446922	0.805223772673515	0.785255655762679	0.798011878607976	0.781536901183865	0.769578692260323	0.774059546973268	0.771511563436958	0.792604088218907	0.776165524490122	0.795000718547986	0.794195799468655	0.776692619642995	0.775646528126778	0.786525119105174	0.777210909306946	0.786604377818162	0.787395461948735	0.786599199867241	0.791777169377041	0.77763545975833	0.776863061934201	0.783845301857962
0.780066356121806	0.790429104671408	0.781364804727051	0.781933155371234	0.787679304386576	0.769058798787508	0.794435165148563	0.782604746213847	0.788154295702563	0.770189835884836	0.782604874425429	0.795540648928824	0.793488936438215	0.780306249445264	0.795479742723294	0.794796827350635	0.786723631726845	0.781377388540596	0.790963566219931	0.807651307165738	0.776013514140376	0.77869128503358	0.792087474521676	0.771312420800749	0.777142488706015	0.7798863568784	0.793243691944134	0.784631761661256	0.797130223679193	0.78680056095575	0.781977301889983	0.797505257733409	0.797449885215279	0.780437907688426	0.796000490853239	0.77286801227364	0.787678236811554	0.783545394587998	0.787933033569992	0.783438678582443	0.784200431733254	0.808901049061474	0.800111389329075	0.780731296049064	0.776306616224143	0.78713717871897	0.780500387248023	0.78946286331317	0.79583304472631	0.771421933862868
0.783924575064543	0.787064144650452	0.785277071961802	0.778864345077753	0.775461359961351	0.79500169695858	0.776317535376216	0.768070869867479	0.771065797211933	0.793440820530684	0.789110195644211	0.788551893687125	0.784862122483845	0.774121339840412	0.769799541436568	0.78265151279087	0.773425758768535	0.773425596445875	0.775192791203789	0.788039518130368	0.775073633267357	0.791383001697464	0.784838215231668	0.797993729255888	0.780448675352951	0.784774126603388	0.787017071796562	0.785806479267199	0.782190363857816	0.789120412775428	0.789235626830923	0.778656944637906	0.785374468657029	0.786739809578342	0.783733795185716	0.787239197519892	0.788548027040142	0.796061788668786	0.78139143810967	0.780566058527117	0.803763578832761	0.782495105103355	0.785926537693897	0.788901362791237	0.785029004202812	0.761863722330453	0.785302184612268	0.798311223923364	0.783059424337763	0.785870747558695
0.782249838205723	0.804735683064405	0.782124829270175	0.794476112578824	0.791543949510037	0.798139564412329	0.780382336092211	0.785217168322351	0.776909297791279	0.781007623723301	0.760726488435189	0.790608611458113	0.778788107920964	0.778958074408272	0.785602247351121	0.792435442069044	0.785628528953385	0.772565604777478	0.77116146605993	0.79430865523941	0.785881215603879	0.781544541847672	0.772714035137542	0.778145185235283	0.781392637311585	0.772464881228276	0.790312070527208	0.773980976376613	0.799050024348508	0.783103214194277	0.808296970655936	0.794913153796721	0.785121497411899	0.779100108768956	0.782848623339218	0.789152562040588	0.780869075555643	0.78945809576162	0.778529076476851	0.780223848446961	0.790110376937445	0.79793700132011	0.780752735839578	0.779393324739642	0.781721004848827	0.789370276864147	0.800836344435596	0.783528760589414	0.784199602573881	0.787988092595836
0.797140832085076	0.7585744862465	0.789859174302479	0.787801707560275	0.788693840304865	0.791562609820484	0.77628193871319	0.766583982135158	0.785672422644355	0.785370023734617	0.785119841271978	0.770536357146758	0.781748245574884	0.78132398931181	0.783029568042074	0.789682536451825	0.793467948781609	0.77326824807056	0.769070927393848	0.790518851446979	0.784830065027684	0.781766420365534	0.793544846047753	0.791804600162674	0.77535288546414	0.793072374474821	0.786745738527698	0.792668383015338	0.786568577100241	0.79051695000705	0.795629886548678	0.796608899502903	0.789686426179049	0.783513137883776	0.768126218795009	0.780715332469399	0.780259567098883	0.778954464019536	0.78504204209541	0.771791147641655	0.786225407400331	0.792183462942739	0.771029641725368	0.784087525668799	0.777226776117571	0.782592433768618	0.796304561599508	0.757355411038246	0.774351249734699	0.782537048293002
0.792001448938762	0.794303904345648	0.782064859224415	0.79114120677689	0.783932717871029	0.776932695263378	0.790537584843778	0.785431655456755	0.77818615186891	0.796536143694418	0.782440871003505	0.793367405435867	0.763935843517203	0.785192104455645	0.788870099857359	0.777343398478522	0.797773102966796	0.772384537660207	0.795141402905011	0.775722657208637	0.766651812363036	0.784330556936582	0.779948921163982	0.787438271919027	0.777200643614803	0.781490971651248	0.78643554887979	0.788496053824732	0.782715654226151	0.781325124971878	0.789357946964376	0.789909699661321	0.784171654499004	0.793626073409674	0.782172775663667	0.779557622973923	0.784390990128123	0.779091604155227	0.78947073509952	0.77219162339794	0.765666687167436	0.792810527055056	0.786087943314164	0.797496488329666	0.790909700990737	0.787148702640531	0.766304393715549	0.774902697361965	0.788548171323788	0.7781169834692
0.79608477904198	0.784726806083258	0.796238550865991	0.781862387933935	0.780710479486395	0.776025972671413	0.781387689667504	0.782620453938216	0.797025019357246	0.774227483767777	0.797459264231986	0.781804958525026	0.771998428860759	0.787052419009629	0.780874619848315	0.782271684962341	0.795185647941803	0.787679954691044	0.772867568588301	0.786375242968959	0.783314270176359	0.779604649507022	0.794232146879041	0.782791363490877	0.788978207422765	0.764276858136283	0.790775757011187	0.784939686472517	0.770968650811151	0.789868775919423	0.771560270262185	0.774190886559778	0.796144517577401	0.77489072103312	0.786179476593872	0.782065262880596	0.788249862227487	0.782511415686415	0.788138685040183	0.789729884841682	0.784973478966132	0.787315871280539	0.796349618697778	0.787686378045826	0.797880118913186	0.787783448142632	0.784549638035869	0.779894997580772	0.788510096477999	0.784169595994691
0.778925887519912	0.785499635237642	0.803144492600274	0.787061216789524	0.786580649801616	0.780407511901536	0.772610506401193	0.771611972796249	0.79340660852115	0.786341574590133	0.773517026835449	0.795920011122912	0.781723167520329	0.77391366198584	0.78841039712188	0.786833820023434	0.772350271151613	0.791201580967322	0.782364528758531	0.774433294405166	0.780250007567507	0.794886387868846	0.787888748546569	0.783928503621752	0.774748926507623	0.768809520809752	0.793568507232665	0.795939878971783	0.795619963598033	0.772870435259322	0.782699305822284	0.780233056658269	0.776926344092158	0.78495045371995	0.782593572623283	0.782818183000216	0.782984581363608	0.777426587376224	0.789126003932917	0.785453846347213	0.779294914591932	0.774038151934444	0.783731057975788	0.777803232380261	0.781168713970117	0.781150813494189	0.798761230795267	0.795008714051586	0.777941141445559	0.79788261418294
0.783901524373218	0.781520069151083	0.788728375979253	0.781307633181395	0.784425215451958	0.772830509145144	0.782559882307565	0.784490474195148	0.781620853880759	0.780262362249776	0.769556564827192	0.787566246695443	0.792829151684299	0.777447393180729	0.779935497862316	0.780114340437301	0.790439333182391	0.780588997771503	0.789090844926146	0.777122694672084	0.776928671491945	0.774871696900587	0.802200176916228	0.78894400717616	0.786536727619094	0.772154732752882	0.781701633960173	0.789912851102884	0.777864698236895	0.778162411236218	0.785051433921402	0.791254309596709	0.758799654940659	0.803759651889599	0.784771574769621	0.784677970033031	0.774201804034669	0.792743084066136	0.786117710011147	0.781473683419658	0.7710508514572	0.7788206546186	0.791752864677443	0.777255683402784	0.78148043829362	0.796543343788665	0.789842708482024	0.787458609433208	0.790347788983438	0.778768583403783
0.781119352477827	0.787665370529711	0.773109482954718	0.79674242647398	0.779779321532518	0.78617968983001	0.789321457941293	0.779920503984067	0.794792343663899	0.781594368314104	0.791271035969949	0.795832318777599	0.790289608711713	0.777124170602944	0.775088857220086	0.786142282424404	0.790998256775691	0.795342351809761	0.775881488179826	0.791575784508787	0.777598920910643	0.778892228840569	0.787816879091341	0.781241002566165	0.782911020398854	0.780526134207666	0.779328529206497	0.791317018371804	0.780975019721146	0.802894010851146	0.800212948136028	0.773075832931303	0.781091076482713	0.793774804560833	0.796850189192936	0.798382746209281	0.792265036576181	0.775085436866364	0.795404512678582	0.780873965112108	0.793715815317147	0.776037434542708	0.760043067968343	0.788769864983261	0.793233446417855	0.782548854514075	0.776534340017512	0.786963064196961	0.772892017548018	0.784375056850348
0.788842171312892	0.785913002320577	0.78437263274945	0.770617446248165	0.781928647782537	0.766397529729783	0.779853176737087	0.780612801016836	0.780825485021641	0.780346040861917	0.780773074808748	0.774529007635644	0.773162798656582	0.797864696610812	0.784469838734462	0.787904980110038	0.777038035881511	0.798690531385115	0.791266780754382	0.799376671548667	0.797726387990279	0.771834685952355	0.7712798747941	0.756469848434988	0.79283636087525	0.786545109635331	0.806762392353284	0.797064778097987	0.78174363952691	0.786445463266679	0.777404369684952	0.778723818755475	0.775588206736414	0.794569542985793	0.789999800768055	0.790754965905793	0.801250080441084	0.783672652188101	0.79089211723418	0.772143822193108	0.790824051266666	0.78265298236142	0.771510026247206	0.799671391212551	0.7786273320655	0.797500622222105	0.778455782121282	0.796288423860429	0.790787212248513	0.785590986585102
0.779154107896864	0.777761924396116	0.786292207031138	0.777944325019499	0.797094060912422	0.785781559104289	0.780061568464686	0.793284220855254	0.784436042627024	0.777741053148699	0.794930284170042	0.787654672877861	0.783475091073887	0.777705813645014	0.792138017767986	0.781635547008404	0.768119797217378	0.787172452922838	0.798092059201947	0.787577618723777	0.789307244262561	0.783062178494371	0.783645507008076	0.795879329070882	0.77845408197504	0.792172042447754	0.789963045623234	0.78238284578131	0.803606334595346	0.781870159998229	0.790024446480302	0.788269410213549	0.789059593507422	0.786133404008032	0.774208537593175	0.776112383014328	0.77460173779476	0.800596382620129	0.789208518076529	0.779003061809453	0.771498984862858	0.784455183377906	0.789501181842134	0.775522035253939	0.790199357333227	0.779282875459737	0.792294955092368	0.785051817359546	0.782695897248491	0.779561881966723
0.774585654346153	0.784544032424449	0.789240463114434	0.787949731503912	0.778027425016838	0.783429560850099	0.786273638284818	0.778248979435315	0.77842795399989	0.791460227461266	0.779955778921999	0.782616075741465	0.8090516082439	0.792355121700799	0.764424893531252	0.776093830788458	0.781096047937862	0.77628919773698	0.783081298285198	0.781522388693995	0.781457545107778	0.802090038998442	0.789987386403688	0.782509330410435	0.784171133783397	0.783564753793416	0.793529714562058	0.783393784814614	0.774727736824232	0.789783918244801	0.777159396503221	0.792750243332377	0.79292373243548	0.778724015868429	0.783556039491734	0.783090923280083	0.784846690052866	0.781660297038088	0.781917097722749	0.774230615833697	0.770194707774685	0.803452556558068	0.78212053921698	0.783919921915286	0.796373017143822	0.776919294836962	0.799211022672837	0.782667446741125	0.775509323231186	0.780977403885838
0.784776950239032	0.794672768623391	0.788027561721412	0.777037100567494	0.779000901104168	0.788328017325851	0.77860126021862	0.780111320863869	0.775166906215863	0.773248268743446	0.79172272435874	0.783341890288344	0.779605915863254	0.786779628442711	0.776302858621988	0.800708458939261	0.77913372544903	0.78216119632135	0.769870544355494	0.778954537763804	0.765895685972225	0.792806278342123	0.76969938593754	0.779777220332837	0.781377867877257	0.779810883824192	0.782052957782494	0.781769227573002	0.795555317610307	0.78301374349454	0.77679503671621	0.777879899795034	0.782064252753062	0.788924167966126	0.789456966960669	0.785412298820736	0.784904332149926	0.784555462554708	0.791952426338145	0.771253933334421	0.781506910356639	0.787059888674179	0.78671855332941	0.785103146378766	0.801268278298025	0.789885161824008	0.789429075161899	0.792619507529743	0.777195748782102	0.77528336245089
0.790981506137771	0.773744204079955	0.789471288376014	0.79233669049444	0.780295924354532	0.780082609476425	0.782674052483153	0.790878604407528	0.778478657613769	0.784920472924402	0.794371324698616	0.78275390013383	0.780893952327687	0.794249307742161	0.773482479050848	0.777772598946214	0.783235921280156	0.781349367883543	0.777967989400929	0.769122737859088	0.768292325859503	0.789855697272642	0.788978456633621	0.778217660631629	0.79689606381093	0.78798155746773	0.790127538459551	0.786431501711762	0.77137023076762	0.79960926443607	0.771082452304523	0.791235116317224	0.782903699838792	0.790655810186923	0.779664801649029	0.765345114911641	0.774913514844059	0.788830381914717	0.773909250540119	0.771386983741285	0.785086062776902	0.786268164574241	0.792106475183149	0.777518267616082	0.789929739940138	0.77293490947679	0.777749966362303	0.794685039505631	0.779103207280604	0.780141919466578
0.80004813706675	0.782679877141989	0.775544463969348	0.784209961461312	0.773927108027604	0.785801031975574	0.776873839433142	0.783676665239521	0.782028137146238	0.795899507941639	0.766510543444699	0.785238839353274	0.789226488666187	0.786934653398715	0.792233012094527	0.783987636377279	0.778792116673068	0.794292672996701	0.777267122091801	0.769505780742167	0.783858063706008	0.788512221154046	0.780976291923074	0.772200914465937	0.780684045104768	0.780878652519912	0.785523813955242	0.77974604827927	0.801824176142871	0.77676660164558	0.78820853320461	0.779216050495256	0.781727572999849	0.767486734366962	0.79424908015187	0.792207794081951	0.793148530156528	0.78470842605353	0.794439315057919	0.787197243343567	0.787224920254176	0.789319291750755	0.788661529137713	0.77772763890605	0.791989724459876	0.792048793507337	0.786698379357004	0.759290692990594	0.784344883455801	0.772049410289648
0.783696088755093	0.789918337236173	0.790156895561427	0.771949678628896	0.772543866231126	0.774308161563381	0.774347513721808	0.785459810273859	0.785709305437169	0.783498204728013	0.77918486903846	0.787366036241919	0.781843971118745	0.777881692064288	0.780214748251968	0.796231493325214	0.784196570843265	0.78329514504176	0.772526943530903	0.781838896082439	0.782788449560498	0.792149240217882	0.7917247475304	0.778970178270177	0.7740909810974	0.775078949177644	0.787557023862514	0.774469681510079	0.787208720128389	0.791240622738315	0.79360768536965	0.789001990994081	0.76342929584609	0.781116063165247	0.788733702816479	0.784655778155659	0.77835758261148	0.788728499698596	0.776287306055559	0.760598415987929	0.785907305536836	0.777776554655902	0.792265924514621	0.779397082198433	0.785007437392276	0.77735627883417	0.787628697688506	0.793586870405255	0.778970287005877	0.784904401954718
0.779511840032097	0.773372983593464	0.762943463774496	0.764327051931214	0.7938968805774	0.777490245878381	0.785181924087247	0.784025871896641	0.773061067914091	0.776475118528853	0.785712885036359	0.781654500802256	0.782312289397703	0.789714654225963	0.789713806117676	0.792868041405851	0.787238689521438	0.776475613961764	0.797125611373075	0.789614963581274	0.795475152337195	0.780571231429304	0.787668007832235	0.77759488814126	0.778417513749323	0.782520554961691	0.79145938759873	0.771431527715234	0.790761746048032	0.793676276805204	0.765107571219696	0.78262072963443	0.775906301779577	0.776590191394212	0.803337838712465	0.787822844338563	0.78639473004258	0.779836086415794	0.784580119754128	0.785974587030716	0.780024343917593	0.779702663469687	0.791709891214418	0.782142009914088	0.779008100559225	0.788932655733614	0.776862528863341	0.792732072464365	0.785635229296539	0.776030477805671
0.794763417426628	0.791836350858489	0.79438715169977	0.786834814280749	0.78481365437096	0.783636602801009	0.782491349187379	0.791248904408428	0.787013065944313	0.775558746431363	0.783436134699829	0.78851841051846	0.777167113123611	0.778396971623037	0.78700033158026	0.795323961346839	0.780542825388393	0.788925860103135	0.778400751816441	0.797156159899906	0.771761305681313	0.793778582053335	0.796160261589787	0.772670946007214	0.771193102876071	0.783861607175186	0.78715080959435	0.787623119388877	0.773648169719888	0.784818781509701	0.768939824331593	0.779165887733275	0.777102855160897	0.786548576312138	0.771336000302586	0.773129777549608	0.792208378520826	0.779233237492552	0.800725797225428	0.78333022003925	0.792044014985697	0.790861364749605	0.785721339873139	0.779725890515482	0.789548953981489	0.787847589832133	0.781222901745989	0.800114801431267	0.796370704583285	0.782508834945946
0.788715891532691	0.7824211426183	0.769564616951906	0.759370804667597	0.789069106706356	0.779591900346274	0.778896072829212	0.776772793584148	0.784249929094166	0.783119006390795	0.77183949407377	0.794574809111706	0.78154835983986	0.784330174493676	0.776619873488857	0.777332646021673	0.778727130178068	0.780590237231133	0.787125353862409	0.790109383238282	0.769570233302878	0.781550828122087	0.789193785303301	0.7820324022972	0.798560380765729	0.77569485685891	0.782383610786606	0.782933541447001	0.781998738150039	0.778653465166546	0.792781121211639	0.781020279149003	0.771034564070202	0.788483790802937	0.789526523749568	0.783687992940748	0.777164635203539	0.784042274860234	0.780112193014605	0.779894773564551	0.777759982597017	0.784366371912178	0.792542813741095	0.784235307700295	0.771354374132227	0.790452609978094	0.797113252934259	0.783337619277258	0.778476785583401	0.784920640892598
0.771912742226448	0.783389724896517	0.778021892596419	0.773571075747673	0.777012752783972	0.780004894017359	0.798679223947659	0.782078998237603	0.775764671033197	0.791292035671485	0.789702795086737	0.784520813765596	0.770222766796832	0.781079995176406	0.792681697772884	0.780616661718086	0.785465484275197	0.784481112295071	0.778136096153161	0.775669014046441	0.770211214088284	0.786520426681937	0.775635932704933	0.795410163945909	0.768866410205377	0.773545851174332	0.786788943140777	0.785333444379408	0.789796211205308	0.795706177861435	0.795780836579445	0.790061457066016	0.781367672000828	0.77847275222856	0.793586294385993	0.804756749665495	0.783118245718902	0.770902085493634	0.785459202701031	0.785704732687135	0.795108478194813	0.781427445967431	0.785760096332419	0.785669324467053	0.766023335629457	0.75233265393895	0.770116521508576	0.775217153906201	0.785904833258405	0.799194640879731
0.773404939977286	0.786932377973221	0.793544405978761	0.775954538149825	0.799524810827632	0.783678017414773	0.763580522402665	0.794807666069345	0.781679443337026	0.780299010495338	0.779934389975432	0.782466912329373	0.770136109106049	0.789331455174644	0.791146220140293	0.794833142439983	0.77821311583722	0.771751755518128	0.786569332344988	0.793280379050064	0.773613598932723	0.79337477764715	0.779451686167998	0.779064163792862	0.773855570004393	0.779214399163868	0.772301700217901	0.778719362394186	0.788958788641615	0.783092436398946	0.785820097823076	0.77700977545335	0.793606576173621	0.79297282030029	0.785259359266785	0.785579028562569	0.769423210895582	0.801398324748988	0.767036852851339	0.78014233926018	0.776230398134709	0.797301199840823	0.795118797315004	0.771176057073193	0.773336805362196	0.772773499517491	0.784653085625874	0.794709199864617	0.784510991516409	0.789364103732783
0.78348616350628	0.786883131373761	0.792724305245928	0.77161464948238	0.784552803144621	0.771556398252445	0.773178757693134	0.779231918183855	0.780366812213784	0.78472194895492	0.807657189134961	0.775041557780569	0.785756843874394	0.774469789550079	0.785519004330425	0.777174538947922	0.779449353354885	0.785569368409699	0.782589875287058	0.778657093063643	0.788774530135676	0.789447272023677	0.791546153790791	0.784395109180818	0.79532947858837	0.778254692527234	0.80235345043758	0.768040111931695	0.77190092546684	0.773583272045238	0.788940603982304	0.788643985315604	0.775362889652561	0.777732660454236	0.77699645194907	0.782865204716666	0.776853981152337	0.777258093581143	0.781841203386351	0.769484752966028	0.775179176092571	0.774164583431895	0.780033987830879	0.788909116716796	0.773116986453714	0.797203610698091	0.786694981326227	0.790812892738255	0.768302316714373	0.774124490692845
0.788197489677332	0.772053248331161	0.782259896634555	0.788364654361065	0.781940747098955	0.787558896130668	0.778058340662471	0.786535906856729	0.781975154990889	0.774015853880959	0.781987948089496	0.784838518242987	0.783846568062441	0.7970666491949	0.778015220770534	0.784498593808124	0.78547747568951	0.770956585255332	0.780232337599578	0.777503139516294	0.788903834031619	0.787571762640446	0.786262037976806	0.798813986697347	0.788208231589052	0.780728348633177	0.783641003813529	0.774936696488891	0.76845158459769	0.793592647093881	0.792512503075001	0.780111579321448	0.778894375981954	0.776029052052139	0.790583784713514	0.791191971600489	0.788625024897666	0.785824088064742	0.781962433494487	0.776712386919549	0.786786649150934	0.779695623552163	0.793136717338815	0.773424905334824	0.796789552702421	0.778634086815497	0.776637799484224	0.78792016704712	0.782947500262239	0.784912793658344
0.788764049718738	0.775157819628858	0.782283781070826	0.770804127453861	0.786401771380312	0.784615032826813	0.779059286591486	0.755541768290366	0.775196892855384	0.794145823315749	0.774401072889383	0.760921667959497	0.778750217147454	0.788700005614001	0.753697825201081	0.769048932506079	0.799964563964506	0.781967042471517	0.786413672618673	0.787173314645608	0.783472815561602	0.786081468284975	0.790974533782844	0.793812332119793	0.785383905255842	0.78899948609858	0.799070432905439	0.782666040750268	0.770698038258147	0.779792657857537	0.787582402618731	0.796279943255154	0.773237624828643	0.785364977029227	0.788042173000172	0.778004175415249	0.786864708581134	0.789608562057435	0.789105909094798	0.776508866517749	0.780159859983965	0.767925191029141	0.774633343515816	0.811180366560579	0.793623450861534	0.778244708658991	0.774766640358862	0.774166299105378	0.795065249042359	0.784566512529306
0.787544017469867	0.78065757194252	0.799461716214012	0.786099108009215	0.759011864529031	0.7573830043078	0.773709473198793	0.782349428115943	0.786285180778759	0.756254116234257	0.78633821521169	0.767623936689837	0.786241034257342	0.792817840392892	0.775371717399612	0.784980895270074	0.788930232952149	0.783465048557358	0.785667711777774	0.793750923412866	0.784720539954812	0.789771184449606	0.77615203223467	0.772690932242986	0.772893697845983	0.77964845697155	0.791750559420583	0.784834878474265	0.791279133020361	0.784873606958187	0.786567349350819	0.775387816899077	0.792539850714706	0.779033410879826	0.767940519166491	0.779663419998868	0.770421200381234	0.762522203317638	0.783878611668821	0.775345236442247	0.77938894220093	0.771692045728741	0.776584171734913	0.777884553545449	0.770167553036221	0.782614710612371	0.782569221896933	0.786001181447082	0.768601965382529	0.790864094577207
0.783294537424538	0.781583118379433	0.779262743546652	0.778842194018428	0.770834442868179	0.794912107157367	0.7785575976768	0.78095196370356	0.797030037134221	0.784566120172171	0.782791670260559	0.790037754753485	0.780834219841682	0.774795259127538	0.77583917326289	0.782323619157167	0.769860550610535	0.783353570361477	0.776003940756275	0.768995565987307	0.791581057444819	0.768041035277003	0.770203624369575	0.802541229140195	0.778065952371317	0.786149596134144	0.789812800038608	0.792978025779201	0.789407820727555	0.791919276258413	0.790101773298567	0.790213021043541	0.771952398124992	0.786272268371201	0.78904786759138	0.78643998231171	0.764506146424739	0.797973427904495	0.7687074335799	0.768922564644059	0.789051033642328	0.784792117110434	0.793903669811509	0.788861872584784	0.788871576379582	0.772128207709584	0.785856122349072	0.786636753930091	0.784166501761957	0.792476033600916
0.780768220036783	0.768174910635673	0.780198204626173	0.77665050391903	0.790480381493763	0.789101333135034	0.785716118596645	0.77708191064846	0.772275571796386	0.771785719372155	0.770473365386497	0.791308478095287	0.786254894086379	0.784049170279498	0.773259921092783	0.777115633740673	0.772369845145188	0.792764967544828	0.78258350194164	0.783849594196098	0.788841207831231	0.766634582776947	0.766106370279405	0.787264160510586	0.789758007917849	0.776760574188927	0.777382238236632	0.78079348775549	0.791012309456855	0.77758542401987	0.793755542354737	0.768856815167362	0.76535154026592	0.780421277081868	0.785453132947031	0.774538990091668	0.780290664567785	0.775912583495837	0.777279389705783	0.777841760805182	0.782307062543898	0.779580324331628	0.782393644179732	0.781702269025043	0.780901937763646	0.798891670564115	0.779742637019451	0.779399389308247	0.791218251943821	0.788617271133451
0.778552470771136	0.784014200086652	0.791101595201903	0.77851468525667	0.782157359659984	0.772875039734288	0.7813403311001	0.776802110680398	0.786841319070392	0.790663176040638	0.782803620469096	0.785715780638111	0.785609675120674	0.763408746498214	0.773108489546166	0.766571086800017	0.777549714038654	0.778439456724584	0.77284683932304	0.790141909873863	0.786363675008014	0.790041481978955	0.783500466110294	0.770360875554176	0.793496052904123	0.783878529143871	0.783812693519028	0.783563106307422	0.767002005052201	0.774563164524949	0.77452700737591	0.780059008073488	0.775275365396442	0.777956000263663	0.785463623532955	0.774970520676802	0.787059280643424	0.788824379732999	0.79261274201434	0.766654775117404	0.775189251926283	0.768389150324903	0.800265912192923	0.783435498841296	0.776337697115851	0.785692189909622	0.780782341455333	0.781132577830827	0.784769782639798	0.776133504187099
0.78533797698853	0.776144449487565	0.766751020553007	0.769081766472721	0.776448588111847	0.776243933738933	0.76631602927523	0.768474280393394	0.772155332908234	0.783156732805147	0.754746747177338	0.786050327745971	0.759369430600312	0.788722517293772	0.775804700164157	0.77733092173408	0.778181936834004	0.766746127202923	0.788248131451975	0.77337078861224	0.787405538438424	0.780844405152156	0.792132536394115	0.788406611129502	0.771501133047891	0.802169533365699	0.785977418122212	0.780561580261635	0.795871442623972	0.781952175805408	0.778146335196986	0.776948909636787	0.77408220513157	0.783627304805527	0.801912013315794	0.779197365400363	0.785841960516802	0.793207813429848	0.772388838049269	0.775324203109319	0.778665081213785	0.78437255975997	0.777862472130433	0.784981187889834	0.788535293291587	0.785121574913546	0.784124069369851	0.783095635857401	0.776099400112543	0.78364975165777
0.776361650879253	0.773339504833134	0.772106475888052	0.780227995122472	0.780834504990158	0.772213548810275	0.773127036126862	0.777975684860262	0.776030608680342	0.788104304795471	0.787650296135263	0.788925782139465	0.773628115749112	0.78412920998542	0.79000023453314	0.786495418448872	0.782314942014202	0.780691744492065	0.7784733177674	0.786448744824457	0.775960820850885	0.792896429855621	0.778641784573621	0.785760368330095	0.787454555318594	0.772852882327415	0.786809815244161	0.779057056777384	0.788131725932657	0.79049901593057	0.779921474330491	0.779069978522772	0.785249594662218	0.782536141789632	0.799477620751549	0.798472917628785	0.772172826948481	0.778221864736386	0.798154839154712	0.769089984957519	0.783008594545642	0.785405893735718	0.778852508639933	0.782994125459648	0.778012735862446	0.784359528965267	0.781801331865249	0.779740852426515	0.790022136107484	0.775880235734178
0.786149045969935	0.782959501654199	0.77109619482026	0.775982270051427	0.786502425697208	0.784810075433144	0.773965784370457	0.78944185022534	0.774891986335692	0.780989905794052	0.790827020384458	0.772682094993024	0.789809509074786	0.79334227148041	0.77315693549836	0.786012295639742	0.783553559781029	0.770040315857422	0.781625292589121	0.784366901924096	0.776123095707352	0.7687629457373	0.771403059664172	0.773563279597578	0.790098048251923	0.791063630468411	0.779668311039123	0.77316383059368	0.781131411318495	0.771798882965252	0.796173794949785	0.783832119871558	0.781713787402074	0.781059673236902	0.791145334414133	0.793613274994264	0.769947187841657	0.783922975770819	0.790729236727284	0.781110241052907	0.783927611259747	0.785965138801136	0.791831943860072	0.773825811780395	0.772810088246762	0.777328491349871	0.779782923320144	0.781288065976258	0.794103878878732	0.797529159507358
0.784338992028936	0.77964352868129	0.757563248319192	0.776346920925663	0.763086988418535	0.790453406785994	0.770485132318411	0.774666627694735	0.786556684739174	0.785919946803237	0.766942330098156	0.777135938424157	0.782889279142465	0.789834209622024	0.777006791636572	0.798989637672429	0.78355767540597	0.769658406119587	0.785100636291133	0.777327174961697	0.780121160306127	0.770885677713117	0.783015934854102	0.768716294190618	0.793815266056651	0.792217787194186	0.792384796821396	0.793708968945277	0.783897118292453	0.787320085081957	0.765509533250476	0.789223415802216	0.788306267887703	0.767069904113806	0.785941066057929	0.784066840569763	0.786979835758693	0.790825315933598	0.795982111287055	0.777023817656905	0.793017985995728	0.775903370560817	0.780005672776286	0.786239701193801	0.78291836782981	0.778765423240663	0.781765088033908	0.795521873814164	0.775735087041607	0.782432435953499
0.780596868197402	0.782523257465239	0.769397091210384	0.7847946656276	0.774483520073403	0.774493720914769	0.793534972372146	0.781718502639127	0.785545588723345	0.785524534488902	0.77167324922059	0.783000916807287	0.786172433461706	0.779246845253873	0.777254574806673	0.776487878511973	0.774520939535484	0.785505450637949	0.775763700712768	0.763879425303453	0.790117584411249	0.788662884350923	0.776113239207288	0.78405832835499	0.782827558361279	0.765186065531787	0.773444854889706	0.783771160340019	0.80225061856086	0.772953745793853	0.778982731947893	0.788363707468602	0.785332946908606	0.790500133193974	0.768549252548512	0.79478564487503	0.786168230432886	0.782621274240692	0.783914692838043	0.795651824455832	0.78304066773908	0.781164157556241	0.791560713301524	0.773356072049432	0.776790315433226	0.779669352211957	0.772449281075358	0.77925213600479	0.786619472184589	0.788798307173773
0.793436719806488	0.777116747562273	0.773570258068716	0.776925297234627	0.780938279799009	0.775785017352406	0.78270433033477	0.79564308430524	0.78588480462805	0.771950267791928	0.794666041093771	0.778891730661723	0.766691165448238	0.780817643569604	0.779207020961406	0.763733784580607	0.779799071344018	0.784075776806469	0.803662651848015	0.789068472939429	0.778331686454572	0.795702716947111	0.781550063783385	0.767436270717635	0.786872772987441	0.795045677748504	0.780526935026962	0.767559368684209	0.782669777295283	0.797031290770359	0.76851183255214	0.777209745853863	0.777602957138745	0.779732632443503	0.780849960360881	0.784992080602348	0.785682400608045	0.779541973779956	0.773483117906344	0.783219226759386	0.782681928600719	0.789300648989272	0.797455421248861	0.780403590009916	0.792485739632188	0.779874468445975	0.7795051067229	0.771580672903163	0.789879838369605	0.799230564262145
0.793613621591409	0.775977436743688	0.785547834941978	0.776666885340155	0.77446473141865	0.791811826214635	0.783970544345734	0.784926472859977	0.771292927557542	0.78375040394172	0.759335423629293	0.777863217136892	0.794798822686387	0.782965385613058	0.780146978578772	0.787429541788454	0.764615855666331	0.791673770489075	0.771906430207356	0.780239752707599	0.789127514686635	0.785742182498983	0.762141288317927	0.765478198567143	0.783036893703698	0.780485382142425	0.777804797476742	0.789118833067779	0.794608837582329	0.777973883846208	0.774035675969534	0.782648631915978	0.790165627211091	0.76972361019534	0.785559198204101	0.788816415648926	0.771645142599666	0.783916221759992	0.778120136554133	0.774562709968741	0.778227239443825	0.793679996960308	0.783511842621085	0.774895780858052	0.790899298828835	0.771397382657545	0.775808153461234	0.790951353802299	0.782828701448688	0.784138162250672
0.785931142249359	0.798690844759462	0.77601326502625	0.773120186442823	0.766630276412717	0.7724018273263	0.768003061748323	0.76753901249533	0.795671545608178	0.781265763986126	0.774450465257711	0.772033518495192	0.776885492614105	0.782229991042985	0.802546322883656	0.782061868267329	0.788317032517039	0.778438273915437	0.783165019263573	0.784113080857311	0.791284366626695	0.790454223937657	0.753543540586031	0.784586911833341	0.785536675165867	0.778685913566852	0.76875570621842	0.796914843931849	0.783090799237146	0.76598507539207	0.776071761193302	0.78788650822684	0.799562816790552	0.779636515516694	0.769710752376104	0.795569272502362	0.784416555268717	0.76721051169229	0.780397307442811	0.764996892213079	0.790600747276905	0.775771291153677	0.787646567183075	0.790952799409322	0.779918714211493	0.793043977094481	0.780606502396749	0.78732443384518	0.78782122146665	0.78696164045074
0.787230250862903	0.771505833683377	0.786850951429784	0.78713562453968	0.76223757530173	0.781750454164071	0.769519805692687	0.789384791066819	0.790476906622524	0.783897821570268	0.78675084967963	0.773809199685719	0.7823575245954	0.783070435055164	0.783057033996519	0.780771695542992	0.788266870679333	0.777537632937896	0.777178232812363	0.783554018746829	0.783679863620784	0.781666184690338	0.78710914919513	0.773650433799111	0.777598981868946	0.801178895732851	0.792348472764041	0.772136299439809	0.795022243220021	0.769491134802994	0.786674530288644	0.776493911938403	0.773594423674611	0.79119874891143	0.780831531999249	0.778656644505668	0.790421521609728	0.774388965515555	0.7884820696619	0.762160655549476	0.788294809654685	0.789401721102529	0.792236044444038	0.778797415712733	0.791695286704344	0.782346763816657	0.786314590597166	0.784800763057629	0.789580272971675	0.784607571102462
0.773689661432167	0.779159614638236	0.771569397792559	0.779594391146084	0.782920976258558	0.782533265685685	0.779921735335247	0.779808436498039	0.783263481784678	0.789153218461142	0.793115776669597	0.787043642108677	0.775158226875437	0.782184374748789	0.768459784997984	0.784761370597522	0.789816842034657	0.793806216991691	0.785887208718195	0.773723718649219	0.781334204726249	0.791622305371292	0.769773808308338	0.774196485907653	0.786992657999783	0.783226958231902	0.791776637713468	0.785832352311144	0.782367939378827	0.776350117632855	0.777665884370999	0.792854318640351	0.783490251134421	0.777305630432493	0.76945278523737	0.765140489364286	0.788799081176654	0.765669141574055	0.786150785379507	0.778571285588516	0.771250370880334	0.778960067684787	0.782146177843456	0.790273805783767	0.789376407839033	0.786844337060667	0.787963927982568	0.788650899142996	0.768223952827496	0.795379968281989
0.779137139273491	0.779442579640787	0.785897516240312	0.783522547032981	0.764453460417364	0.7785807917099	0.787062175834291	0.786504377924038	0.78069902126144	0.777923184169603	0.793544344068062	0.773664803199523	0.773544619528819	0.777420222524345	0.788007190436724	0.791682236937838	0.785898254770849	0.774332401727965	0.76446760101643	0.777667588968808	0.782758453489892	0.771597798009138	0.787111423357148	0.783162778938153	0.787384151405227	0.770185133327436	0.79562148418622	0.790122744184725	0.775795875957717	0.783163562314383	0.773155195019209	0.776765547778039	0.803208374939741	0.790461618246573	0.78426826415164	0.786790920852058	0.777194217517172	0.775097801121729	0.783925869992568	0.775757203272978	0.789923147781127	0.773627583468158	0.782327131118022	0.794510257397608	0.783184610728072	0.782908227022313	0.782523591310646	0.766778100561274	0.786384403818354	0.782941216911977
0.784350339769819	0.763269944805212	0.780409316929308	0.776789940984913	0.785649056305753	0.781373644970738	0.78364784391791	0.782364874648463	0.788778106351367	0.766348020158384	0.800107442704851	0.774173265911998	0.77389127105094	0.796272893152655	0.782218269732746	0.77852352502216	0.772569524425175	0.794825344161693	0.779780579203736	0.773769766815462	0.78038836460813	0.787815356948637	0.787699162554956	0.76598183929554	0.777456177090749	0.794744861024811	0.783296409684099	0.778291605174726	0.776652581587729	0.782470357877282	0.782038693813558	0.790273151902896	0.784355315784393	0.779645275726064	0.782489574151768	0.781608105332144	0.778474735282155	0.795143746957502	0.785675812821236	0.7732688270717	0.782001436359388	0.766494006999024	0.785346605669574	0.791553631526833	0.778863780993454	0.779741650543267	0.787079030807013	0.779803228610133	0.777741791055094	0.776124168623142
0.78688132470029	0.759213785963586	0.794445430890331	0.784638824428182	0.771596296081034	0.782572059303089	0.778662347462336	0.800773142665788	0.769802667263914	0.766747320774213	0.785240879412788	0.776403482732546	0.786252015819344	0.776703958675107	0.766348526990005	0.784942510409785	0.784200021125032	0.785033035877403	0.768616230647323	0.778447742079563	0.77765886743074	0.774003577257052	0.788629700611969	0.775874333756288	0.795434184550357	0.77536845781212	0.7926956486964	0.782237076294952	0.783986193180123	0.770780480494009	0.779946030362814	0.803585311308043	0.772035429785226	0.786135004313052	0.782114751556704	0.780531521351287	0.789861157221166	0.771316270033667	0.775586728858702	0.791392650120297	0.787824221806896	0.771754903139543	0.778851826813352	0.779042920828759	0.793928286992466	0.774133608496809	0.777555489094884	0.79010232261916	0.784807000662286	0.794288548680187
0.783715312139031	0.769701157746477	0.769512270191042	0.790450138846126	0.780118557540186	0.774118344451996	0.781746536959518	0.792343842822605	0.781570460047874	0.779056420049168	0.775853857897451	0.784685099805735	0.770672460048828	0.770593011503006	0.790361292828426	0.761847786874147	0.780080102024272	0.791945656891733	0.781755118346044	0.774661371642467	0.767004674347698	0.77985476128782	0.784875988395291	0.787093050245433	0.785571091957683	0.789906389577541	0.779478204167737	0.777505868815035	0.780545783990967	0.76152753534212	0.784668264852178	0.774898440433887	0.778248348434992	0.779097118387282	0.795751545318925	0.788045342981712	0.77747419309199	0.781666700246907	0.763862069775971	0.790923076711196	0.780433137856025	0.790354194751728	0.776833162762668	0.759473213331365	0.787099946260756	0.785545857647854	0.770371238587015	0.774700742809172	0.767475910023761	0.777031928008108
0.785946112981835	0.780407300242641	0.784634686029437	0.77652901046817	0.769199723292903	0.780807443064169	0.786761950007637	0.765909537927086	0.78743873268167	0.786279876455209	0.798150898721464	0.786601446089598	0.772147615130889	0.781503346023024	0.76966838426663	0.777281764575932	0.777514192970789	0.774842673896435	0.781510625210776	0.799784537142442	0.760730299915692	0.801123004678617	0.788948852116071	0.783571187610875	0.779332931084526	0.783947565159537	0.781786205319103	0.786821594672207	0.767278828256696	0.778601665774456	0.794487946632663	0.783755107021933	0.766012014780203	0.783578127537474	0.777509756369526	0.772003026468291	0.772019097480847	0.767915324589539	0.789507461696221	0.78454252522251	0.772461664765402	0.787282418945197	0.771237970100789	0.766899583941904	0.763689191470729	0.784827198836755	0.790723270484139	0.795335253951942	0.774670926758357	0.786889346071788
0.788624145182065	0.779961196607534	0.773242531270997	0.786272475459351	0.78538710773376	0.785370838654692	0.778460753003772	0.788064360789099	0.788475269216456	0.782557089598831	0.787891574438452	0.787345516194761	0.774724354143378	0.786118130676769	0.794307731922902	0.780449334809097	0.791333679089926	0.787703638244133	0.791007163339401	0.783468626591299	0.794261101707979	0.793915510421662	0.776280281970867	0.789165619669235	0.77433470141017	0.77038462897678	0.776646874829522	0.772801542006054	0.782923299492615	0.76019211636809	0.785966913676959	0.773493037879794	0.793052608302549	0.774429612598743	0.775339179620682	0.789933077407221	0.772097274195837	0.780329761254959	0.779736812338721	0.785713133122664	0.792631869345401	0.773790996712167	0.789242761425847	0.771523646588263	0.770783661774849	0.786217777457511	0.781438393315866	0.787382294059911	0.767080512766434	0.784835925662433
0.790302650128063	0.776214722162631	0.774354804559919	0.781131718493376	0.778235045719935	0.796939716511359	0.783694494621385	0.779293930675176	0.777951425428728	0.788563976519939	0.782437650976996	0.785809825716036	0.769918283231122	0.771310415282827	0.776734403195063	0.781938877001448	0.774308318982106	0.761240094392726	0.773887506526399	0.783379483524422	0.772038574670744	0.783393848871356	0.786220149540642	0.782585778101945	0.767586749153379	0.795880173653921	0.780772495059176	0.779642704349597	0.769641673267876	0.794333934505998	0.769879288236952	0.788353407119949	0.800629858529203	0.774670688288647	0.785937100984084	0.790711802292774	0.781730908989154	0.777675542427221	0.78983491120986	0.779652608847495	0.797020487232644	0.772285701594956	0.773480183232552	0.789944131833761	0.782559585287155	0.77316682069648	0.773462991767103	0.802859025392914	0.78882780447806	0.791485365836992
0.775455105180971	0.793314731041128	0.792083726443306	0.77575552769245	0.779150240320879	0.784235132838616	0.76740700172859	0.76555052013634	0.775304815992791	0.776019807099585	0.776793851769967	0.783268787817243	0.777517506472417	0.777650133946547	0.794617562991137	0.782923040404437	0.793162957001415	0.766406188250309	0.788029499006995	0.786309466744491	0.79411298326053	0.779651318476722	0.774261801464443	0.786151736970694	0.778584703792173	0.772032159642822	0.770323781819644	0.778791931410184	0.772371731180373	0.782863971493748	0.782472757380251	0.805508959160099	0.774016331953157	0.777140794712463	0.785834242454194	0.76575960150919	0.764319128762913	0.771123834410835	0.793432933512117	0.784893855793437	0.785908231344229	0.783054737138605	0.781289545013161	0.774207581749686	0.758789118168059	0.768270055825	0.769027000567273	0.774471810795138	0.789254943898755	0.77506706374546
0.774870605665841	0.788731904679423	0.77396965756355	0.794573431542306	0.773602835417047	0.781690668547811	0.783633908895042	0.791176964030926	0.779255711367612	0.776468204329297	0.796122796644004	0.793321145871254	0.774450219183044	0.787956143021363	0.774216187721282	0.793945515422396	0.776950987420877	0.772457328625124	0.780693086715534	0.776098003772204	0.784442079741574	0.777170156011468	0.782315724264971	0.790478552646174	0.801480133842535	0.777067089241042	0.786515396820158	0.787746946227285	0.767393135748644	0.773903439204737	0.772974506875228	0.773673810307339	0.775946378157675	0.762914852916856	0.770835873933013	0.787348226323888	0.793036302213877	0.787930759700032	0.778092601514708	0.765258215567139	0.783456712558104	0.776169937772203	0.77419930913657	0.77033326146794	0.777682973002294	0.785845780332942	0.765251708253661	0.780571666325228	0.780798566663059	0.7890689224901
0.779446337249622	0.775400648167987	0.77015520656767	0.781668319218366	0.777192364337516	0.76792707562257	0.793135267462057	0.782658311635139	0.775765959571916	0.785189035464006	0.785113863224142	0.781437834096204	0.781590685869171	0.787868251111374	0.77735458944332	0.769035951085231	0.783295274399482	0.784603325243689	0.780589646791602	0.77007098663366	0.772142158340423	0.782351299412897	0.776103452525021	0.77899660691361	0.778821265061072	0.786322782481981	0.778195516175912	0.780278319635163	0.775799248982559	0.782988077900237	0.778587919492522	0.768503821573405	0.778259047408582	0.772828480321129	0.777628982785761	0.787249893873317	0.773942334409866	0.768765494770277	0.772930804621279	0.780771973501511	0.787077834742713	0.771056509188006	0.774971082183817	0.779345054834683	0.768661090026148	0.779432016570864	0.78164060394646	0.778076807006136	0.788901034137333	0.770878244393696
0.792906108013828	0.774863571939155	0.778450156730538	0.789534478508409	0.774234700572905	0.782543944307712	0.767926851393426	0.77754885654153	0.786479720927758	0.777205915800761	0.774647933763404	0.794485366628953	0.776224968082717	0.788333226526508	0.777451401169478	0.781736173513418	0.779787581807407	0.784858260501267	0.78224134012263	0.783385186290967	0.78174726726578	0.782969196441941	0.789528564547764	0.770807916949286	0.785251688200673	0.79262191706588	0.784694707515859	0.787547253178573	0.783146222414052	0.776934005238599	0.775682943640768	0.78523606896661	0.779254419860709	0.776044141760055	0.779552696382967	0.772142652703266	0.786461451748546	0.781117869625552	0.782128381361107	0.775962804232824	0.793863974337147	0.782108476141048	0.77899755285345	0.789498686893474	0.786783611814511	0.773420984365998	0.784688957349885	0.781662112125888	0.77892208789027	0.767557087036899
0.772974522037034	0.782374140302754	0.77855881604371	0.793817123804578	0.772174018382716	0.768500507759283	0.767477047420414	0.791411608739927	0.776762974719251	0.783672708097569	0.767410835963683	0.774732814157569	0.774177570999004	0.771826383851682	0.778384032226823	0.78492767429845	0.77541143224047	0.774867868057915	0.77493601197628	0.782747698215407	0.763897075555294	0.794619092105962	0.795505696279941	0.77949414745228	0.767258668873031	0.771972791693697	0.791043450155722	0.783779463732319	0.775214763307722	0.778203605733175	0.781907455731534	0.777508582725937	0.777071910240521	0.788239600609246	0.765752564581676	0.777794918159402	0.774913350076923	0.785958556251089	0.780977226318453	0.78313491067566	0.783390638683815	0.802855353367186	0.778547126422056	0.784271857247395	0.765824250051351	0.78063020602224	0.776038587585719	0.782557551696464	0.780395322809548	0.786805278199644
0.783992995656705	0.769303214017811	0.782273008661988	0.780953595483023	0.774305605082812	0.779775692643021	0.77542975660225	0.779330138043193	0.781901176826998	0.778323015470892	0.789681837168302	0.790166538293489	0.793811676638515	0.767610703107321	0.769630081061256	0.766600826487265	0.757964672333795	0.772680610258402	0.806834273782187	0.784718543579639	0.786055419879202	0.791574228206592	0.805063590259307	0.791730228849964	0.786269948483288	0.788326129734559	0.776879887657734	0.778020296670108	0.76721775735506	0.768455107740585	0.769563080466591	0.765089351278813	0.772265697556803	0.781237136933947	0.777399290070134	0.771641094024718	0.775806336501461	0.777143235507007	0.77346162912909	0.786861417341768	0.777359210483527	0.768433758045246	0.77991324949463	0.782171961048621	0.781929732764153	0.764371210393593	0.789663060351294	0.771184456524183	0.785885506442715	0.770348909275647
0.775451924117127	0.774406140314748	0.780494236938873	0.78774302329236	0.76958097789414	0.785889641903237	0.777881975643691	0.792296728432403	0.765637705209125	0.772599158536793	0.787874583308361	0.780457347646306	0.775912684837697	0.768289915961078	0.783304984870357	0.797328817554849	0.787507385815907	0.778852866995693	0.766047301216731	0.786318835787655	0.787800186564709	0.788463381125065	0.776758866449283	0.78192222349525	0.772459859171527	0.779621877689128	0.773519929033398	0.767335724855047	0.778497699995027	0.778284078747336	0.773788938728692	0.771003884316984	0.774783164984386	0.763065448856379	0.78230141987429	0.77890283269936	0.774266626151578	0.794756927645573	0.788528205968247	0.785003000002451	0.799607073908135	0.783575427293333	0.769292551628592	0.781289256493016	0.771323060361253	0.769160784023205	0.778163287958849	0.776768355962108	0.779638033505215	0.791538466744795
0.786917678800285	0.767283071884378	0.793119046596311	0.77698991874447	0.781072247359816	0.783877158475787	0.773170803555073	0.791696521764038	0.797738761316087	0.787487218621663	0.789152694891531	0.755674220210712	0.779359255685733	0.77526912257359	0.777570914271026	0.77466836653484	0.784204848385354	0.775115873379929	0.77256292951669	0.795478173523565	0.771845641680758	0.771861845038392	0.771765822051906	0.774374421549532	0.767787746423934	0.787055197398453	0.774830392560828	0.776809138524975	0.78922992513813	0.765139344616038	0.793087346501876	0.775642095324408	0.769878295814029	0.779245554431431	0.783047477383892	0.779886747374842	0.76950276996609	0.777862387595381	0.7818695814954	0.786548736197902	0.78109456614275	0.782898813499341	0.78572388583889	0.789730795190451	0.7831973185268	0.773540453728158	0.78773300925275	0.775735588278848	0.788378555710453	0.77722949592804
0.765211610506924	0.785043265896905	0.800057051236325	0.784009805267284	0.790845901211156	0.787702982993173	0.79955878665897	0.781001575514379	0.78468160340815	0.777909508382285	0.786527790549888	0.785734503571382	0.778369886487787	0.788470868814222	0.793873208145921	0.778408174774712	0.781696747941616	0.783145305740848	0.787357056390514	0.77044865236475	0.779603103124003	0.784022571702055	0.789837103604601	0.779453487856531	0.788110433783347	0.78119914216208	0.787683775557238	0.790416593220907	0.781155945285135	0.78661501211802	0.769298401240581	0.784833249349202	0.783043869600969	0.775567908163013	0.789378103280311	0.783784260151627	0.781832559429799	0.783367416812985	0.796434139046799	0.787978030686823	0.785744327872255	0.761006339998506	0.796281648372103	0.787059296818012	0.780266652209046	0.786797773518243	0.774131566809935	0.783577039622	0.780014700603612	0.786650559001071
0.783366870547109	0.768949318248194	0.769803163414166	0.786771865567551	0.781924147171322	0.78393726028877	0.776111551641132	0.787216680729853	0.78008835825331	0.766157663278821	0.783554923136835	0.784184002300004	0.771908012974412	0.776837932024689	0.782745752918955	0.777498848700874	0.78818172740625	0.776582527713262	0.779726509630298	0.778908011795964	0.775582049918041	0.775582556798867	0.802578671650464	0.782865384820336	0.785272754142738	0.780247507230705	0.787558137093339	0.770796872746319	0.798158073533631	0.782004912002121	0.775459809450614	0.786601386458586	0.774013334038037	0.772512740110609	0.770959396314008	0.778752643432665	0.783121006847702	0.781852210926247	0.785993745122239	0.784602840923145	0.772925018754887	0.774505841769019	0.775239291629658	0.776222832735807	0.789390798660643	0.77375618456186	0.785539648050048	0.782632662322795	0.777805466740257	0.778666529629846
0.773129348173578	0.780859268109544	0.791944521567037	0.772499627471712	0.777501212822716	0.786418778331011	0.766796491138442	0.777379323630703	0.785872454727607	0.780846504027885	0.770221510515627	0.778680341028601	0.785271572973426	0.769671181206753	0.786582626446565	0.794254078356892	0.773889466759212	0.778286317502046	0.769843938565486	0.773202819197344	0.778571903462226	0.789783695900662	0.784270700297358	0.788906439617528	0.782162527745458	0.775723111262959	0.785784369202025	0.79143772198768	0.787404251249151	0.767555498675866	0.772197283267211	0.780097420735069	0.768292348016163	0.756665984921313	0.779534335781024	0.780307252988612	0.780003491576821	0.759891158071293	0.775573498490072	0.770468110860583	0.78588367189855	0.791630171816726	0.77769166213094	0.789682710367407	0.771210594376371	0.788720090381551	0.780210848782709	0.778242605028078	0.776244401463639	0.783047276302976
0.788131280276769	0.773703225077502	0.769021121222176	0.775696146374724	0.76807517515532	0.764397178335476	0.775664961732239	0.787993761088816	0.79338154642166	0.770305384551022	0.796097745456767	0.777421583302193	0.777779358892425	0.783926609877547	0.785604076329927	0.787299205150773	0.764151856938589	0.768699924463152	0.760438455987347	0.772437325347879	0.767993296046651	0.767219039922392	0.76260070160761	0.784879976847902	0.78160013980133	0.786654038804861	0.785724259879917	0.778593675384773	0.776354976754435	0.763175574698323	0.781383681914265	0.773413088447585	0.768393077886351	0.75659671585571	0.782093036482747	0.773088463268206	0.794866030339164	0.787786531672593	0.785335997779652	0.782497615960927	0.793084996726502	0.778905534223862	0.784816990761789	0.783390511396032	0.775177905462411	0.773689854241634	0.76832926414159	0.779262175434525	0.781866904649933	0.77977332071186
0.79656803782531	0.777326855295423	0.78228328646963	0.781528819898339	0.777201268285176	0.767263260887619	0.76815846445428	0.781114259105376	0.782989159420162	0.780002566806805	0.783139727129961	0.791454645629035	0.781695209482702	0.781399659112775	0.788220382043801	0.789199292697008	0.786427580380688	0.776988629338403	0.77317818293492	0.775985793677144	0.795369417395207	0.788329072278237	0.782566557498341	0.785051695724807	0.782268912587988	0.769279876770774	0.768799056117598	0.792057305261086	0.786321708639667	0.777704859799615	0.784410139236208	0.780069727217492	0.78834869782836	0.775155140531802	0.782574468081577	0.79167766604692	0.779531859839374	0.793120263676772	0.788097071263896	0.771267038191927	0.782965961613012	0.770892754617658	0.783959054375503	0.785847583480905	0.78680858570675	0.797430847625282	0.775404066641925	0.775214096521636	0.774740278822388	0.798362907025195
0.786032145078795	0.755559759724315	0.771447302213891	0.792062595188832	0.776222239272642	0.781688906704424	0.767160256555362	0.776166191694059	0.78312451146896	0.777163703054944	0.784078253536619	0.790068250378315	0.790738635652977	0.780822454277984	0.767670223249722	0.780978191379744	0.780706845302705	0.788203513281202	0.782463265594829	0.781086721129749	0.790508578861139	0.769242214901946	0.769171180063203	0.76997463060838	0.769856017027524	0.772042447597094	0.792820895146679	0.777312467099224	0.782557743330389	0.796606185655225	0.792885665139933	0.768946836849866	0.791450625382374	0.77615734982379	0.786961882486806	0.7859794861171	0.774719560938086	0.779735356040066	0.764386825438005	0.782029499356985	0.787393266207869	0.7801241557845	0.793302120933082	0.783145171287005	0.775345918547179	0.787155899367818	0.784534471363603	0.789254709633695	0.772053386398507	0.780213014901762
0.776275162689571	0.769094575461521	0.773909633401685	0.785793719280879	0.783292519285471	0.775881630291927	0.770408640975327	0.778909891818898	0.789938656576371	0.777097123160152	0.777941655596028	0.784875908802865	0.771014099460421	0.791960068768365	0.784966899655391	0.777636200047319	0.781619721725465	0.783864034137754	0.769233018593624	0.767718802289399	0.7729133056606	0.772447888134742	0.778640095319251	0.780578149070733	0.791101733874003	0.792065634024262	0.780395511374598	0.77400320483679	0.792317529375142	0.790201865169441	0.786804913556756	0.77452255445998	0.773932076972641	0.780591080792226	0.781276005117474	0.774392726854811	0.79561965266605	0.7839630853434	0.772262801329262	0.77533473461367	0.799183138672915	0.781341727783952	0.772306407617508	0.777143602064382	0.799624704477559	0.79080899182485	0.776958778335471	0.790273916936043	0.771626099901287	0.775922716849854
0.801211797177329	0.771777657158671	0.784734813538121	0.786805332493482	0.789209764216162	0.760834550773421	0.780578012839504	0.789843170373104	0.769656962073106	0.770812575891171	0.790181481715861	0.772860210459556	0.777894978793203	0.77882730819979	0.779525441682556	0.767986091729049	0.788537552750657	0.789166327219962	0.78988249365301	0.773172305704197	0.792652200791176	0.784250859858954	0.762223703505221	0.771782187980411	0.782441583815356	0.7873498012741	0.778079494200355	0.77521735113789	0.777288501046226	0.787427360183878	0.794009490236466	0.789829773261755	0.78129962935512	0.779622224449958	0.776305881833748	0.785757240821721	0.778135607073211	0.771768043452221	0.781786690674532	0.780071935567712	0.787724487834709	0.77137106671355	0.786613149422687	0.78027836857389	0.785233202444739	0.7814071058951	0.766983545965046	0.765389478456796	0.774490480456851	0.79022841484054
0.771410539131363	0.796255672417221	0.760733111810679	0.794169004047887	0.77314899212195	0.794111134654038	0.784253003889125	0.796215150755788	0.787332039619244	0.790011217469218	0.787080585300264	0.798903472961873	0.777061418889947	0.7878628253779	0.774566654253382	0.779252256584063	0.778765374352533	0.77608697835194	0.791706791839355	0.783528257803634	0.78128968581988	0.779009677141773	0.767369637966688	0.786465027554854	0.798783982494465	0.797050197242769	0.783182431697024	0.776747034277526	0.782756689914714	0.777527798200394	0.768393387906316	0.782026302881545	0.775215835880382	0.780655690005217	0.769522277781237	0.779911147719128	0.78330024149789	0.779042079033248	0.781960998245134	0.791491330429322	0.773471833398436	0.765174028984139	0.768728752218116	0.775942308457373	0.792806061653381	0.799795314605021	0.792470244686851	0.778757461974779	0.786794237764803	0.779757917345624
0.774065755925543	0.77775193346026	0.779360075650975	0.782342750086088	0.781971286622162	0.778107977461784	0.787010864928409	0.77806935268843	0.789121360245106	0.776121569011138	0.779056080716317	0.776625237695611	0.779637483992144	0.762783020175679	0.787837298566786	0.778012322464988	0.785951208607544	0.776934284399126	0.78169810266013	0.784195437542369	0.772959628254179	0.799457862623976	0.77033921058771	0.782407184304675	0.780102917748126	0.786119952687298	0.771431950822016	0.786818000195428	0.787684852783111	0.76316995667441	0.772780489861957	0.778752429183567	0.79275200633597	0.785651508806197	0.779901548046422	0.779817180744276	0.76844851336373	0.792215910938514	0.776308733813875	0.781275397996384	0.777064830927309	0.783930543153115	0.775414036171945	0.783906764094172	0.782284838415359	0.783797842139433	0.785778522608204	0.776693103186652	0.771767236324841	0.774758137470836
0.787916286269054	0.777124424694544	0.778454836968361	0.783393930020031	0.761594555690728	0.778896847269521	0.774218041449141	0.776419308566761	0.779975514416409	0.770967912560863	0.764946927423956	0.76903989008719	0.783368444485274	0.780850212333864	0.792336567284954	0.775764646820442	0.781982648588883	0.770573785334046	0.769550572284599	0.764712393687413	0.797083800657165	0.783834130507345	0.787459945350013	0.770355393864633	0.785733492477485	0.777922215446975	0.769591945482198	0.790730293493157	0.783080592421526	0.767541913423141	0.77878721984985	0.76813127972464	0.783914256250434	0.788457777175041	0.770503760174773	0.798395359754453	0.787493875629524	0.775321153342952	0.774593807342851	0.771364826992192	0.781830574408315	0.755353049182267	0.782751230883706	0.775834728906729	0.774308702035414	0.790215651019227	0.783797558736203	0.7722797260505	0.763288632246504	0.781118868516816
0.785850585118403	0.79019697338513	0.778408629372631	0.767116602933655	0.794042405789284	0.791535046142696	0.769284050606243	0.780860789316897	0.789793714882295	0.780977655610957	0.774036122032556	0.783780082882373	0.793875177990821	0.791569504358481	0.793806731707956	0.791429199415166	0.77774426956896	0.783473274656429	0.789211741733079	0.768336641121772	0.782967328499188	0.77005597550147	0.771896562448745	0.76647390068422	0.786297784160996	0.787601736359859	0.783977182737089	0.777983394240569	0.77782374568509	0.782395301134192	0.777309239458408	0.783740091977482	0.800777410053681	0.772276402129861	0.778457682284106	0.773688598956844	0.781149251713133	0.784486835222028	0.791513593796497	0.772807933783316	0.784338184496167	0.785439526752316	0.788402712548565	0.774939142173729	0.791387580346749	0.789560960614409	0.79421748157585	0.777880988504477	0.782589571305077	0.766299493458281
0.783177967743388	0.762434369252489	0.769258120834195	0.780343286464833	0.781529052170103	0.77902394956918	0.774960829180305	0.775584945309178	0.784252595248534	0.755849584683682	0.783219525851589	0.786013870309951	0.786849377742776	0.800234752395593	0.771326474249679	0.776588329020304	0.777233698043357	0.794395253319905	0.783006658501573	0.775624350066095	0.772478856613636	0.780200241826426	0.778168268643618	0.783677637586408	0.777935697152713	0.776004424791795	0.790189948640155	0.768776785808209	0.786239452340887	0.775653549500659	0.794589163627207	0.796093493365941	0.781318043593111	0.783439640182957	0.77499229051356	0.783677643429088	0.773556321441404	0.783660875207193	0.796212335626477	0.784290915803929	0.791144740875369	0.792629258648095	0.779055889589428	0.78809273067348	0.777069045244487	0.783510738465444	0.775677127932672	0.785009199043579	0.78635054808471	0.784570215146134
0.781946577176221	0.769066406307275	0.783608261937409	0.769658087995179	0.78771335669267	0.776620225277056	0.790630656594047	0.792935526959327	0.792953269142458	0.776633579684865	0.779232775289343	0.788036008973435	0.776962624795216	0.780050973349809	0.77339743961972	0.764121100929645	0.778806934280549	0.780686092538413	0.776662496858822	0.794268210256147	0.785665411488865	0.786917289363532	0.783087872847378	0.781187120760132	0.764175694906993	0.773397662045296	0.776242174438251	0.786777798912631	0.78237275863883	0.779118089254282	0.777687392873345	0.785458360706864	0.77103396550041	0.762720303539626	0.778905825787372	0.790556805042564	0.783979841533161	0.78675230774732	0.770197504657378	0.786424542420974	0.781734366442589	0.775627895456143	0.775477740448141	0.77323431324192	0.784496209285081	0.780045535589892	0.781807129730355	0.790129043482578	0.766836542669947	0.773313318773431
0.793073769825561	0.770156177409289	0.783108829866216	0.782144140231307	0.77517004095262	0.785820232790957	0.768012079437727	0.765003854360132	0.776501867278703	0.776174148354495	0.781860602258842	0.781766204601916	0.769011688734543	0.778245158292521	0.782087443501141	0.788322693966451	0.776203997794929	0.798617731227154	0.781823462468534	0.778317549590787	0.788066645071565	0.776383770780441	0.76771712342484	0.767165744224546	0.777045010062812	0.785916393490995	0.800583802118895	0.783103401993192	0.777808842868093	0.77856388218213	0.777740184637585	0.783301185119298	0.773688571000478	0.793483184873315	0.77513294920407	0.783246207229117	0.775547544187275	0.774646325294547	0.791108537600952	0.758543765811371	0.769740988326365	0.769606664452177	0.791007641612342	0.770767963125265	0.767401595255715	0.779068732880514	0.77923797507537	0.779812489365009	0.773171760348132	0.771361383970125
0.778799008578167	0.78774066467824	0.783337830783193	0.772724171406344	0.780281211275618	0.801331912603381	0.779239767123553	0.779028298050501	0.782097105493791	0.780649972904791	0.787053615805632	0.770996733288728	0.789228348835231	0.787357020629326	0.786701267140593	0.782587710343895	0.782582197005134	0.771819198693363	0.767499331334936	0.777053309578678	0.797896793245273	0.76465117142951	0.763550501016726	0.78343696861376	0.778284096554553	0.790404338614344	0.780534740332909	0.779926236165611	0.770882593117352	0.773883942129579	0.767292182317642	0.7882704673328	0.782313226955713	0.775612323442291	0.779910362426325	0.788350979963864	0.78840218606833	0.781764822996879	0.780868246302332	0.787602794113525	0.782778138565988	0.784213631833346	0.773621477373899	0.783922034298229	0.795204079343067	0.768477239216342	0.784725977896797	0.787260322856807	0.764764228411011	0.769088213514851
0.772363243060637	0.77953176905429	0.770060582758986	0.781241675018671	0.795649826872326	0.7788134309845	0.773775420472431	0.788952314309324	0.771035331952937	0.775652289938173	0.785599700104025	0.774231675203211	0.783498469427511	0.765067785358759	0.768206422289504	0.77173939601865	0.773227004414154	0.783118023721228	0.764905518721077	0.770515114828371	0.785788791011957	0.783037794820704	0.781804880840222	0.779520497151577	0.765759983378234	0.774524246561935	0.787591043682853	0.778155032379128	0.786198492877877	0.771199121412915	0.783720363955889	0.781580887890731	0.777051847131423	0.771453208239274	0.774661802040902	0.766471284481996	0.783921348629882	0.765333022542827	0.783524471487613	0.77297120083396	0.776375585169016	0.776172212353273	0.772772232875722	0.778184337685302	0.784009717894716	0.788221259319235	0.804452191573307	0.774650988329318	0.789433752393982	0.794863407287622
0.769442537238806	0.784879326896128	0.76845375098056	0.786834182892044	0.767324978514359	0.772885704651137	0.782589663785498	0.772565850736451	0.78707312434047	0.800348311369263	0.785176794542235	0.787223679312383	0.782997785424429	0.789824315948789	0.764915820158537	0.79846450922373	0.795518597199178	0.785624997497076	0.782398952205319	0.792296535751667	0.770837226590579	0.776294481618523	0.778714414289411	0.76536937945287	0.780391524379268	0.788319062339936	0.779524450122129	0.773594001150704	0.779385584010379	0.770410191351405	0.77130905875748	0.784153925981758	0.782499706752437	0.786769977704823	0.785525714787658	0.772255363404918	0.781364685814318	0.785619949375593	0.795405378622879	0.786408244136433	0.788792702244622	0.778853446793813	0.788708856148718	0.770732810437389	0.766450923538289	0.789264803477156	0.772599637179801	0.795643422645418	0.795411075134754	0.769644063291204
0.76556138824644	0.777156098959073	0.782138409206598	0.765685536235026	0.793855979321778	0.763665160220444	0.779092301035008	0.801578250580017	0.778455356185639	0.804680014692325	0.794728191287494	0.787420227878439	0.769551945398617	0.788178950591746	0.773869819967484	0.780868039663457	0.789156035500941	0.776770619566092	0.789692140980305	0.787144612923647	0.783860506233563	0.774876754117793	0.787832254632793	0.778496226547341	0.783659830097556	0.78750750674757	0.792497801158464	0.778611175757383	0.771961049756571	0.781947831726632	0.766741096704897	0.783709855326389	0.790117177534249	0.774302892124876	0.779176797888101	0.781334332712043	0.767145230951554	0.771519982811224	0.771294773385833	0.770890049807702	0.780677577677432	0.768292152161446	0.806452115743722	0.77744351441302	0.772561871856216	0.790373694808412	0.780186367259968	0.77732319540278	0.784204734901793	0.789189554882396
0.782645139816119	0.787900930533409	0.782037007115893	0.776734518849073	0.787652214210225	0.783537082000511	0.786024284043015	0.789113411467973	0.791538171569097	0.774921604657719	0.774433257817448	0.766186427209718	0.779839860354111	0.770783226260646	0.776410147260636	0.777101027221169	0.769972235774422	0.779662994066267	0.776136338958645	0.784560925491129	0.780591546946867	0.772980476026798	0.783628678339756	0.786680116836459	0.767023712173913	0.77743754012627	0.776195977709236	0.768136913747687	0.77355255729631	0.793469544111985	0.775392698694995	0.772497548927495	0.784583992234674	0.780342220898531	0.791155448526063	0.774655397833514	0.780468652121977	0.766980916752487	0.796118796250801	0.775416436946512	0.773961022024625	0.772327000129665	0.773834724737396	0.781014171512235	0.769551481153679	0.774216133692996	0.773698797976481	0.774878595439504	0.780324107819067	0.775079545356571
0.791119836711612	0.785950494243541	0.787728010218027	0.779059698432247	0.778733019880137	0.779787946207691	0.793351807244225	0.792614377510909	0.779651550442241	0.778396818088443	0.781395774286111	0.775642261665233	0.779670930486892	0.780191514729761	0.777260221413855	0.781519726410381	0.770520039344817	0.77227291977438	0.803938412100037	0.785072771369928	0.787243834993024	0.797067233257105	0.786232588170085	0.774570930261035	0.793447829347527	0.770387086894812	0.78111981602423	0.761154500503398	0.78122142630856	0.762808625953994	0.787321931354412	0.779758329866633	0.785461570873325	0.783290072072452	0.790865123859524	0.779468876288037	0.7883927122884	0.776324021713727	0.787514520679575	0.781174714901622	0.789118163094367	0.78006558145282	0.774621614215241	0.774664288441092	0.77707063034261	0.787801351357048	0.782703005180481	0.776234185173748	0.773760123703119	0.782044675603142
0.785719918911062	0.770433358870441	0.787526086030196	0.773507230649726	0.782778506599701	0.771578776429161	0.794897582841324	0.801644904879059	0.791954101865624	0.780945549221884	0.789716481146525	0.786781935920707	0.782926373367931	0.78422073201314	0.770492365570157	0.784691808965773	0.765695583223473	0.784191398434966	0.7817752988432	0.769369934625531	0.777124313789592	0.772379997375016	0.772858576253832	0.76618096778553	0.780743582965734	0.784633909087488	0.78431045667787	0.786401466142671	0.782472373207519	0.782679745632179	0.788373075117165	0.768307205514469	0.773265311352034	0.768807600474485	0.778663529834725	0.788667840659507	0.770852037953437	0.775732302397858	0.788182786095097	0.780054229744886	0.783711282703596	0.774484476532339	0.781317775557041	0.772692249643931	0.776872165244964	0.788411872377238	0.776491779418326	0.775312108533774	0.782758346963251	0.788636557420437
0.787271979928427	0.774634384966891	0.783961148815741	0.775595403209424	0.768967246617491	0.781288833325943	0.788745530983086	0.77837583255364	0.78624095851669	0.772129341416365	0.777429506155118	0.765470728845539	0.774699870837857	0.786981337598962	0.787455464594042	0.77010091496366	0.758462776727911	0.790116911647318	0.776676750785495	0.773453080459212	0.779935098446555	0.791368946632311	0.782557252753769	0.781180341690794	0.778970349329845	0.777675251571123	0.796021956286143	0.786865835724854	0.797146088721934	0.801901326323841	0.778258507477929	0.777893782485053	0.76867730238512	0.761557189103767	0.785778154448581	0.781486659544416	0.780581981807339	0.76029118613381	0.781826689753301	0.779396266223326	0.800035949436585	0.76647170059217	0.782502428537054	0.757824154789123	0.783439740528408	0.770628618378387	0.766274423485258	0.779694060815417	0.793835646770854	0.781671299986564
0.778333574606357	0.77107601866777	0.786474043714556	0.774155777280479	0.777217856091667	0.768360109790096	0.784750909222939	0.78440093452666	0.782239457212974	0.773797233227879	0.764593024446245	0.772128718447298	0.784501900299877	0.763135921728756	0.782559921941426	0.776895082443607	0.786995262684345	0.773692464177568	0.780043011362848	0.763073799062858	0.774386850516404	0.790626319199345	0.779812747756585	0.784110924832547	0.779834772573189	0.787943468420977	0.785540699365852	0.788188098795412	0.794961248977707	0.780026568366069	0.784240844439092	0.769962797076123	0.787545279979482	0.785924019875146	0.80234521248831	0.787719553528927	0.794970513849083	0.78221744405831	0.793216987537052	0.78029023626876	0.796192995030104	0.778191127286837	0.796436515745328	0.772387363307742	0.789747543397393	0.773873084072719	0.778953226071246	0.786570336354126	0.78211179394843	0.785436466947765
0.774517112508934	0.773984872114541	0.781505664429981	0.792432675003341	0.77805602774619	0.774298416680628	0.774610857541565	0.776510295218903	0.770298383916663	0.783127755243857	0.792032271117181	0.762791906401332	0.796843054818414	0.765559600021258	0.792575968891151	0.78128349162527	0.791782624129186	0.7668431757222	0.783516370834769	0.786223940789356	0.787590736158604	0.783237429745796	0.763340597008906	0.777903722837139	0.772956680548952	0.771424583985135	0.770981299621698	0.775996728894197	0.786017333117536	0.791134632030626	0.783734012208872	0.781358534246463	0.77187496042759	0.773149138565035	0.770108062731601	0.784368332076897	0.778158241363272	0.76755938494305	0.792647630369375	0.778790997762522	0.789242510051754	0.775542408409248	0.781561772182203	0.782168258074854	0.767585831473441	0.771816468762016	0.776789894257403	0.767989490489964	0.787243017333535	0.799468911219285
[truncated: 2,891 more rows]
[truncated: 511 more columns]
