# Supplementary material for: Non-classical microwave–optical photon pair generation with a chip-scale transducer
Source: Springer Nature journal article supplement (doi:10.1038/s41567-024-02409-z), 2024-02-23
Supplement: MOESM2 [file 41567_2024_2409_MOESM2_ESM.zip › FigS6/data_key_for_S6a.txt]

first row: t(us)
second row: blue pump
third row: red pump
fourth row: DCR
fifth row: leakage
