# Supplementary material for: Non-classical microwave–optical photon pair generation with a chip-scale transducer
Source: Springer Nature journal article supplement (doi:10.1038/s41567-024-02409-z), 2024-02-23
Supplement: MOESM2 [file 41567_2024_2409_MOESM2_ESM.zip › FigS6/data_S6a.txt]

-0.634228187919463	-0.624161073825503	-0.614093959731543	-0.604026845637584	-0.593959731543624	-0.583892617449664	-0.573825503355704	-0.563758389261745	-0.553691275167785	-0.543624161073825	-0.533557046979866	-0.523489932885906	-0.513422818791946	-0.503355704697986	-0.493288590604027	-0.483221476510067	-0.473154362416107	-0.463087248322148	-0.453020134228188	-0.442953020134228	-0.432885906040268	-0.422818791946309	-0.412751677852349	-0.402684563758389	-0.392617449664429	-0.382550335570469	-0.37248322147651	-0.36241610738255	-0.35234899328859	-0.34228187919463	-0.332214765100671	-0.322147651006711	-0.312080536912751	-0.302013422818792	-0.291946308724832	-0.281879194630872	-0.271812080536912	-0.261744966442953	-0.251677852348993	-0.241610738255033	-0.231543624161074	-0.221476510067114	-0.211409395973154	-0.201342281879194	-0.191275167785235	-0.181208053691275	-0.171140939597315	-0.161073825503356	-0.151006711409396	-0.140939597315436
1.37616322352503	1.46802298529686	1.47148939140145	1.46975618834915	1.45242415782617	1.44029173646008	1.43335892425088	1.55814954401638	1.40389447236181	1.43335892425088	1.40389447236181	1.43162572119859	1.49748743718593	1.37962962962963	1.46975618834915	1.45415736087847	1.35363158384515	1.52695188907501	1.4160268937279	1.5304182951796	1.42642611204169	1.43509212730318	1.47495579750605	1.45589056393077	1.5356179043365	1.5356179043365	1.55814954401638	1.68987297599107	1.66387493020659	1.71760422482784	1.73320305229853	1.75920109808301	1.74186906756002	1.92038898194677	1.92038898194677	1.91172296668528	1.97585147962032	1.92732179415597	2.14917178485018	2.08157686581053	2.07637725665364	2.11450772380421	2.26182998324958	2.25143076493579	2.21156709473292	2.54954168993114	2.66913270053974	2.78352410199144	3.4178764191327	3.73505257770333
1.50730590049028	1.45243335680828	1.52559674838428	1.59678251653352	1.52559674838428	1.54388759627829	1.5063170887769	1.62199504642122	1.54487640799167	1.36196792905165	1.46627672079567	1.35455401000488	1.25716690025456	1.31302825564995	1.42178453130058	1.4390865674812	1.46133266222874	1.66648723591631	1.7040577434177	1.53449605380475	1.57107774959275	1.66945367105646	1.63979365726215	1.62842449136185	1.52461227427814	1.56811565205984	1.68231256093771	1.60420944840202	1.7975026191362	1.916643586581	1.73027643544774	1.94334150284239	1.91121162856824	1.69271460316084	1.85239251324718	2.05309960302813	2.04865211912152	2.02294735218075	2.06496968119599	2.22069234442879	2.20092044776833	1.95424445733308	1.99824007216785	2.13418650113294	2.36109493251498	2.52373927774148	2.45700533110609	2.37692025753638	2.41449076503777	2.37493829650237
1.41388925385772	1.41388925385772	1.41388925385772	1.41388925385772	1.41388925385772	1.41388925385772	1.41388925385772	1.41388925385772	1.41388925385772	1.41388925385772	1.41388925385772	1.41388925385772	1.41388925385772	1.41388925385772	1.41388925385772	1.41388925385772	1.41388925385772	1.41388925385772	1.41388925385772	1.41388925385772	1.41388925385772	1.41388925385772	1.41388925385772	1.41388925385772	1.41388925385772	1.41388925385772	1.41388925385772	1.41388925385772	1.41388925385772	1.41388925385772	1.41388925385772	1.41388925385772	1.41388925385772	1.41388925385772	1.41388925385772	1.41388925385772	1.41388925385772	1.41388925385772	1.41388925385772	1.41388925385772	1.41388925385772	1.41388925385772	1.41388925385772	1.41388925385772	1.41388925385772	1.41388925385772	1.41388925385772	1.41388925385772	1.41388925385772	1.41388925385772
1.40798148158438	1.40798148158438	1.40798148158438	1.40044665883242	1.41551630433635	1.40044665883242	1.41174889296037	1.42305112708832	1.39667924745643	1.42305112708832	1.44565559534422	1.41551630433635	1.42305112708832	1.41928371571233	1.41928371571233	1.41551630433635	1.43435336121627	1.43058594984029	1.43812077259225	1.41174889296037	1.43812077259225	1.43812077259225	1.46449265222414	1.46449265222414	1.48709712048004	1.49086453185602	1.57374758212766	1.61142169588749	1.68300251203118	1.71690921441503	1.73951368267093	1.76211815092683	1.82616414431855	1.90527978321421	1.94672130835002	1.97309318798191	1.99946506761379	2.01453471311773	2.0898829406374	2.12002223164527	2.15392893402912	2.2255097501728	2.1124874088933	2.25564904118067	2.21044010466887	2.38750843934009	2.30462538906846	2.36113655970821	2.30839280044444	2.21044010466887
[truncated: 99 more columns]
