# Supplementary material for: Non-classical microwave–optical photon pair generation with a chip-scale transducer
Source: Springer Nature journal article supplement (doi:10.1038/s41567-024-02409-z), 2024-02-23
Supplement: MOESM2 [file 41567_2024_2409_MOESM2_ESM.zip › FigS7/data_key_for_S7.txt]

S7z
first row: t (us)
second row: MW intensity (normalized)
---
S7b
first row: detuning (MHz)
second row: PSD (a.u.)
