# Supplementary material for: Non-classical microwave–optical photon pair generation with a chip-scale transducer
Source: Springer Nature journal article supplement (doi:10.1038/s41567-024-02409-z), 2024-02-23
Supplement: MOESM2 [file 41567_2024_2409_MOESM2_ESM.zip › FigS7/figS7a.txt]

-0.099688, -0.098728, -0.097768, -0.096808, -0.095848, -0.094888, -0.093928, -0.092968, -0.092008, -0.091048, -0.090088, -0.089127, -0.088167, -0.087207, -0.086247, -0.085287, -0.084327, -0.083367, -0.082407, -0.081447, -0.080487, -0.079527, -0.078567, -0.077606, -0.076646, -0.075686, -0.074726, -0.073766, -0.072806, -0.071846, -0.070886, -0.069926, -0.068966, -0.068006, -0.067046, -0.066086, -0.065125, -0.064165, -0.063205, -0.062245, -0.061285, -0.060325, -0.059365, -0.058405, -0.057445, -0.056485, -0.055525, -0.054565, -0.053604, -0.052644, -0.051684, -0.050724, -0.049764, -0.048804, -0.047844, -0.046884, -0.045924, -0.044964, -0.044004, -0.043044, -0.042084, -0.041123, -0.040163, -0.039203, -0.038243, -0.037283, -0.036323, -0.035363, -0.034403, -0.033443, -0.032483, -0.031523, -0.030563, -0.029602, -0.028642, -0.027682, -0.026722, -0.025762, -0.024802, -0.023842, -0.022882, -0.021922, -0.020962, -0.020002, -0.019042, -0.018082, -0.017121, -0.016161, -0.015201, -0.014241, -0.013281, -0.012321, -0.011361, -0.010401, -0.009441, -0.008481, -0.007521, -0.006561, -0.005600, -0.004640, -0.003680, -0.002720, -0.001760, -0.000800, 0.000160, 0.001120, 0.002080, 0.003040, 0.004000, 0.004960, 0.005920, 0.006881, 0.007841, 0.008801, 0.009761, 0.010721, 0.011681, 0.012641, 0.013601, 0.014561, 0.015521, 0.016481, 0.017441, 0.018402, 0.019362, 0.020322, 0.021282, 0.022242, 0.023202, 0.024162, 0.025122, 0.026082, 0.027042, 0.028002, 0.028962, 0.029922, 0.030883, 0.031843, 0.032803, 0.033763, 0.034723, 0.035683, 0.036643, 0.037603, 0.038563, 0.039523, 0.040483, 0.041443, 0.042404, 0.043364, 0.044324, 0.045284, 0.046244, 0.047204, 0.048164, 0.049124, 0.050084, 0.051044, 0.052004, 0.052964, 0.053924, 0.054885, 0.055845, 0.056805, 0.057765, 0.058725, 0.059685, 0.060645, 0.061605, 0.062565, 0.063525, 0.064485, 0.065445, 0.066406, 0.067366, 0.068326, 0.069286, 0.070246, 0.071206, 0.072166, 0.073126, 0.074086, 0.075046, 0.076006, 0.076966, 0.077926, 0.078887, 0.079847, 0.080807, 0.081767, 0.082727, 0.083687, 0.084647, 0.085607, 0.086567, 0.087527, 0.088487, 0.089447, 0.090408, 0.091368, 0.092328, 0.093288, 0.094248, 0.095208, 0.096168, 0.097128, 0.098088, 0.099048, 0.100008, 0.100968, 0.101928, 0.102889, 0.103849, 0.104809, 0.105769, 0.106729, 0.107689, 0.108649, 0.109609, 0.110569, 0.111529, 0.112489, 0.113449, 0.114410, 0.115370, 0.116330, 0.117290, 0.118250, 0.119210, 0.120170, 0.121130, 0.122090, 0.123050, 0.124010, 0.124970, 0.125930, 0.126891, 0.127851, 0.128811, 0.129771, 0.130731, 0.131691, 0.132651, 0.133611, 0.134571, 0.135531, 0.136491, 0.137451, 0.138412, 0.139372, 0.140332, 0.141292, 0.142252, 0.143212, 0.144172, 0.145132, 0.146092, 0.147052, 0.148012, 0.148972, 0.149932, 0.150893, 0.151853, 0.152813, 0.153773, 0.154733, 0.155693, 0.156653, 0.157613, 0.158573, 0.159533, 0.160493, 0.161453, 0.162414, 0.163374, 0.164334, 0.165294, 0.166254, 0.167214, 0.168174, 0.169134, 0.170094, 0.171054, 0.172014, 0.172974, 0.173934, 0.174895, 0.175855, 0.176815, 0.177775, 0.178735, 0.179695, 0.180655, 0.181615, 0.182575, 0.183535, 0.184495, 0.185455, 0.186416, 0.187376, 0.188336, 0.189296, 0.190256, 0.191216, 0.192176, 0.193136, 0.194096, 0.195056, 0.196016, 0.196976, 0.197936, 0.198897, 0.199857, 0.200817, 0.201777, 0.202737, 0.203697, 0.204657, 0.205617, 0.206577, 0.207537, 0.208497, 0.209457, 0.210418, 0.211378, 0.212338, 0.213298, 0.214258, 0.215218, 0.216178, 0.217138, 0.218098, 0.219058, 0.220018, 0.220978, 0.221938, 0.222899, 0.223859, 0.224819, 0.225779, 0.226739, 0.227699, 0.228659, 0.229619, 0.230579, 0.231539, 0.232499, 0.233459, 0.234420, 0.235380, 0.236340, 0.237300, 0.238260, 0.239220, 0.240180, 0.241140, 0.242100, 0.243060, 0.244020, 0.244980, 0.245940, 0.246901, 0.247861, 0.248821, 0.249781, 0.250741, 0.251701, 0.252661, 0.253621, 0.254581, 0.255541, 0.256501, 0.257461, 0.258422, 0.259382, 0.260342, 0.261302, 0.262262, 0.263222, 0.264182, 0.265142, 0.266102, 0.267062, 0.268022, 0.268982, 0.269942, 0.270903, 0.271863, 0.272823, 0.273783, 0.274743, 0.275703, 0.276663, 0.277623, 0.278583, 0.279543, 0.280503, 0.281463, 0.282424, 0.283384, 0.284344, 0.285304, 0.286264, 0.287224, 0.288184, 0.289144, 0.290104, 0.291064, 0.292024, 0.292984, 0.293944, 0.294905, 0.295865, 0.296825, 0.297785, 0.298745, 0.299705, 0.300665, 0.301625, 0.302585, 0.303545, 0.304505, 0.305465, 0.306426, 0.307386, 0.308346, 0.309306, 0.310266, 0.311226, 0.312186, 0.313146, 0.314106, 0.315066, 0.316026, 0.316986, 0.317946, 0.318907, 0.319867, 0.320827, 0.321787, 0.322747, 0.323707, 0.324667, 0.325627, 0.326587, 0.327547, 0.328507, 0.329467, 0.330428, 0.331388, 0.332348, 0.333308, 0.334268, 0.335228, 0.336188, 0.337148, 0.338108, 0.339068, 0.340028, 0.340988, 0.341948, 0.342909, 0.343869, 0.344829, 0.345789, 0.346749, 0.347709, 0.348669, 0.349629, 0.350589, 0.351549, 0.352509, 0.353469, 0.354430, 0.355390, 0.356350, 0.357310, 0.358270, 0.359230, 0.360190, 0.361150, 0.362110, 0.363070, 0.364030, 0.364990, 0.365950, 0.366911, 0.367871, 0.368831, 0.369791, 0.370751, 0.371711, 0.372671, 0.373631, 0.374591, 0.375551, 0.376511, 0.377471, 0.378432, 0.379392, 0.380352, 0.381312, 0.382272, 0.383232, 0.384192, 0.385152, 0.386112, 0.387072, 0.388032, 0.388992, 0.389952, 0.390913, 0.391873, 0.392833, 0.393793, 0.394753, 0.395713, 0.396673, 0.397633, 0.398593, 0.399553, 0.400513, 0.401473, 0.402434, 0.403394, 0.404354, 0.405314, 0.406274, 0.407234, 0.408194, 0.409154, 0.410114, 0.411074, 0.412034, 0.412994, 0.413954, 0.414915, 0.415875, 0.416835, 0.417795, 0.418755, 0.419715, 0.420675, 0.421635, 0.422595, 0.423555, 0.424515, 0.425475, 0.426436, 0.427396, 0.428356, 0.429316, 0.430276, 0.431236, 0.432196, 0.433156, 0.434116, 0.435076, 0.436036, 0.436996, 0.437956, 0.438917, 0.439877, 0.440837, 0.441797, 0.442757, 0.443717, 0.444677, 0.445637, 0.446597, 0.447557, 0.448517, 0.449477, 0.450438, 0.451398, 0.452358, 0.453318, 0.454278, 0.455238, 0.456198, 0.457158, 0.458118, 0.459078, 0.460038, 0.460998, 0.461958, 0.462919, 0.463879, 0.464839, 0.465799, 0.466759, 0.467719, 0.468679, 0.469639, 0.470599, 0.471559, 0.472519, 0.473479, 0.474440, 0.475400, 0.476360, 0.477320, 0.478280, 0.479240, 0.480200, 0.481160, 0.482120, 0.483080, 0.484040, 0.485000, 0.485960, 0.486921, 0.487881, 0.488841, 0.489801, 0.490761, 0.491721, 0.492681, 0.493641, 0.494601, 0.495561, 0.496521, 0.497481, 0.498442, 0.499402, 0.500362, 0.501322, 0.502282, 0.503242, 0.504202, 0.505162, 0.506122, 0.507082, 0.508042, 0.509002, 0.509962, 0.510923, 0.511883, 0.512843, 0.513803, 0.514763, 0.515723, 0.516683, 0.517643, 0.518603, 0.519563, 0.520523, 0.521483, 0.522444, 0.523404, 0.524364, 0.525324, 0.526284, 0.527244, 0.528204, 0.529164, 0.530124, 0.531084, 0.532044, 0.533004, 0.533964, 0.534925, 0.535885, 0.536845, 0.537805, 0.538765, 0.539725, 0.540685, 0.541645, 0.542605, 0.543565, 0.544525, 0.545485, 0.546446, 0.547406, 0.548366, 0.549326, 0.550286, 0.551246, 0.552206, 0.553166, 0.554126, 0.555086, 0.556046, 0.557006, 0.557966, 0.558927, 0.559887, 0.560847, 0.561807, 0.562767, 0.563727, 0.564687, 0.565647, 0.566607, 0.567567, 0.568527, 0.569487, 0.570448, 0.571408, 0.572368, 0.573328, 0.574288, 0.575248, 0.576208, 0.577168, 0.578128, 0.579088, 0.580048, 0.581008, 0.581968, 0.582929, 0.583889, 0.584849, 0.585809, 0.586769, 0.587729, 0.588689, 0.589649, 0.590609, 0.591569, 0.592529, 0.593489, 0.594450, 0.595410, 0.596370, 0.597330, 0.598290, 0.599250, 0.600210, 0.601170, 0.602130, 0.603090, 0.604050, 0.605010, 0.605970, 0.606931, 0.607891, 0.608851, 0.609811, 0.610771, 0.611731, 0.612691, 0.613651, 0.614611, 0.615571, 0.616531, 0.617491, 0.618452, 0.619412, 0.620372, 0.621332, 0.622292, 0.623252, 0.624212, 0.625172, 0.626132, 0.627092, 0.628052, 0.629012, 0.629972, 0.630933, 0.631893, 0.632853, 0.633813, 0.634773, 0.635733, 0.636693, 0.637653, 0.638613, 0.639573, 0.640533, 0.641493, 0.642454, 0.643414, 0.644374, 0.645334, 0.646294, 0.647254, 0.648214, 0.649174, 0.650134, 0.651094, 0.652054, 0.653014, 0.653974, 0.654935, 0.655895, 0.656855, 0.657815, 0.658775, 0.659735, 0.660695, 0.661655, 0.662615, 0.663575, 0.664535, 0.665495, 0.666456, 0.667416, 0.668376, 0.669336, 0.670296, 0.671256, 0.672216, 0.673176, 0.674136, 0.675096, 0.676056, 0.677016, 0.677976, 0.678937, 0.679897, 0.680857, 0.681817, 0.682777, 0.683737, 0.684697, 0.685657, 0.686617, 0.687577, 0.688537, 0.689497, 0.690458, 0.691418, 0.692378, 0.693338, 0.694298, 0.695258, 0.696218, 0.697178, 0.698138, 0.699098, 0.700058, 0.701018, 0.701978, 0.702939, 0.703899, 0.704859, 0.705819, 0.706779, 0.707739, 0.708699, 0.709659, 0.710619, 0.711579, 0.712539, 0.713499, 0.714460, 0.715420, 0.716380, 0.717340, 0.718300, 0.719260, 0.720220, 0.721180, 0.722140, 0.723100, 0.724060, 0.725020, 0.725980, 0.726941, 0.727901, 0.728861, 0.729821, 0.730781, 0.731741, 0.732701, 0.733661, 0.734621, 0.735581, 0.736541, 0.737501, 0.738462, 0.739422, 0.740382, 0.741342, 0.742302, 0.743262, 0.744222, 0.745182, 0.746142, 0.747102, 0.748062, 0.749022, 0.749982, 0.750943, 0.751903, 0.752863, 0.753823, 0.754783, 0.755743, 0.756703, 0.757663, 0.758623, 0.759583, 0.760543, 0.761503, 0.762464, 0.763424, 0.764384, 0.765344, 0.766304, 0.767264, 0.768224, 0.769184, 0.770144, 0.771104, 0.772064, 0.773024, 0.773984, 0.774945, 0.775905, 0.776865, 0.777825, 0.778785, 0.779745, 0.780705, 0.781665, 0.782625, 0.783585, 0.784545, 0.785505, 0.786466, 0.787426, 0.788386, 0.789346, 0.790306, 0.791266, 0.792226, 0.793186, 0.794146, 0.795106, 0.796066, 0.797026, 0.797986, 0.798947, 0.799907, 0.800867, 0.801827, 0.802787, 0.803747, 0.804707, 0.805667, 0.806627, 0.807587, 0.808547, 0.809507, 0.810468, 0.811428, 0.812388, 0.813348, 0.814308, 0.815268, 0.816228, 0.817188, 0.818148, 0.819108, 0.820068, 0.821028, 0.821988, 0.822949, 0.823909, 0.824869, 0.825829, 0.826789, 0.827749, 0.828709, 0.829669, 0.830629, 0.831589, 0.832549, 0.833509, 0.834470, 0.835430, 0.836390, 0.837350, 0.838310, 0.839270, 0.840230, 0.841190, 0.842150, 0.843110, 0.844070, 0.845030, 0.845990, 0.846951, 0.847911, 0.848871, 0.849831, 0.850791, 0.851751, 0.852711, 0.853671, 0.854631, 0.855591, 0.856551, 0.857511, 0.858472, 0.859432, 0.860392, 0.861352, 0.862312, 0.863272, 0.864232, 0.865192, 0.866152, 0.867112, 0.868072, 0.869032, 0.869992, 0.870953, 0.871913, 0.872873, 0.873833, 0.874793, 0.875753, 0.876713, 0.877673, 0.878633, 0.879593, 0.880553, 0.881513, 0.882474, 0.883434, 0.884394, 0.885354, 0.886314, 0.887274, 0.888234, 0.889194, 0.890154, 0.891114, 0.892074, 0.893034, 0.893994, 0.894955, 0.895915, 0.896875, 0.897835, 0.898795, 0.899755, 0.900715, 0.901675, 0.902635, 0.903595, 0.904555, 0.905515, 0.906476, 0.907436, 0.908396, 0.909356, 0.910316, 0.911276, 0.912236, 0.913196, 0.914156, 0.915116, 0.916076, 0.917036, 0.917996, 0.918957, 0.919917, 0.920877, 0.921837, 0.922797, 0.923757, 0.924717, 0.925677, 0.926637, 0.927597, 0.928557, 0.929517, 0.930478, 0.931438, 0.932398, 0.933358, 0.934318, 0.935278, 0.936238, 0.937198, 0.938158, 0.939118, 0.940078, 0.941038, 0.941998, 0.942959, 0.943919, 0.944879, 0.945839, 0.946799, 0.947759, 0.948719, 0.949679, 0.950639, 0.951599, 0.952559, 0.953519, 0.954480, 0.955440, 0.956400, 0.957360, 0.958320, 0.959280, 0.960240, 0.961200, 0.962160, 0.963120, 0.964080, 0.965040, 0.966001, 0.966961, 0.967921, 0.968881, 0.969841, 0.970801, 0.971761, 0.972721, 0.973681, 0.974641, 0.975601, 0.976561, 0.977521, 0.978482, 0.979442, 0.980402, 0.981362, 0.982322, 0.983282, 0.984242, 0.985202, 0.986162, 0.987122, 0.988082, 0.989042, 0.990003, 0.990963, 0.991923, 0.992883, 0.993843, 0.994803, 0.995763, 0.996723, 0.997683, 0.998643, 0.999603, 1.000563, 1.001523, 1.002484, 1.003444, 1.004404, 1.005364, 1.006324, 1.007284, 1.008244, 1.009204, 1.010164, 1.011124, 1.012084, 1.013044, 1.014005, 1.014965, 1.015925, 1.016885, 1.017845, 1.018805, 1.019765, 1.020725, 1.021685, 1.022645, 1.023605, 1.024565, 1.025525, 1.026486, 1.027446, 1.028406, 1.029366, 1.030326, 1.031286, 1.032246, 1.033206, 1.034166, 1.035126, 1.036086, 1.037046, 1.038007, 1.038967, 1.039927, 1.040887, 1.041847, 1.042807, 1.043767, 1.044727, 1.045687, 1.046647, 1.047607, 1.048567, 1.049527, 1.050488, 1.051448, 1.052408, 1.053368, 1.054328, 1.055288, 1.056248, 1.057208, 1.058168, 1.059128, 1.060088, 1.061048, 1.062009, 1.062969, 1.063929, 1.064889, 1.065849, 1.066809, 1.067769, 1.068729, 1.069689, 1.070649, 1.071609, 1.072569, 1.073529, 1.074490, 1.075450, 1.076410, 1.077370, 1.078330, 1.079290, 1.080250, 1.081210, 1.082170, 1.083130, 1.084090, 1.085050, 1.086011, 1.086971, 1.087931, 1.088891, 1.089851, 1.090811, 1.091771, 1.092731, 1.093691, 1.094651, 1.095611, 1.096571, 1.097531, 1.098492, 1.099452, 1.100412, 1.101372, 1.102332, 1.103292, 1.104252, 1.105212, 1.106172, 1.107132, 1.108092, 1.109052, 1.110013, 1.110973, 1.111933, 1.112893, 1.113853, 1.114813, 1.115773, 1.116733, 1.117693, 1.118653, 1.119613, 1.120573, 1.121533, 1.122494, 1.123454, 1.124414, 1.125374, 1.126334, 1.127294, 1.128254, 1.129214, 1.130174, 1.131134, 1.132094, 1.133054, 1.134015, 1.134975, 1.135935, 1.136895, 1.137855, 1.138815, 1.139775, 1.140735, 1.141695, 1.142655, 1.143615, 1.144575, 1.145535, 1.146496, 1.147456, 1.148416, 1.149376, 1.150336, 1.151296, 1.152256, 1.153216, 1.154176, 1.155136, 1.156096, 1.157056, 1.158017, 1.158977, 1.159937, 1.160897, 1.161857, 1.162817, 1.163777, 1.164737, 1.165697, 1.166657, 1.167617, 1.168577, 1.169537, 1.170498, 1.171458, 1.172418, 1.173378, 1.174338, 1.175298, 1.176258, 1.177218, 1.178178, 1.179138, 1.180098, 1.181058, 1.182019, 1.182979, 1.183939, 1.184899, 1.185859, 1.186819, 1.187779, 1.188739, 1.189699, 1.190659, 1.191619, 1.192579, 1.193539, 1.194500, 1.195460, 1.196420, 1.197380, 1.198340, 1.199300, 1.200260, 1.201220, 1.202180, 1.203140, 1.204100, 1.205060, 1.206021, 1.206981, 1.207941, 1.208901, 1.209861, 1.210821, 1.211781, 1.212741, 1.213701, 1.214661, 1.215621, 1.216581, 1.217541, 1.218502, 1.219462, 1.220422, 1.221382, 1.222342, 1.223302, 1.224262, 1.225222, 1.226182, 1.227142, 1.228102, 1.229062, 1.230023, 1.230983, 1.231943, 1.232903, 1.233863, 1.234823, 1.235783, 1.236743, 1.237703, 1.238663, 1.239623, 1.240583, 1.241543, 1.242504, 1.243464, 1.244424, 1.245384, 1.246344, 1.247304, 1.248264, 1.249224, 1.250184, 1.251144, 1.252104, 1.253064, 1.254025, 1.254985, 1.255945, 1.256905, 1.257865, 1.258825, 1.259785, 1.260745, 1.261705, 1.262665, 1.263625, 1.264585, 1.265545, 1.266506, 1.267466, 1.268426, 1.269386, 1.270346, 1.271306, 1.272266, 1.273226, 1.274186, 1.275146, 1.276106, 1.277066, 1.278027, 1.278987, 1.279947, 1.280907, 1.281867, 1.282827, 1.283787, 1.284747, 1.285707, 1.286667, 1.287627, 1.288587, 1.289547, 1.290508, 1.291468, 1.292428, 1.293388, 1.294348, 1.295308, 1.296268, 1.297228, 1.298188, 1.299148, 1.300108, 1.301068, 1.302029, 1.302989, 1.303949, 1.304909, 1.305869, 1.306829, 1.307789, 1.308749, 1.309709, 1.310669, 1.311629, 1.312589, 1.313549, 1.314510, 1.315470, 1.316430, 1.317390, 1.318350, 1.319310, 1.320270, 1.321230, 1.322190, 1.323150, 1.324110, 1.325070, 1.326031, 1.326991, 1.327951, 1.328911, 1.329871, 1.330831, 1.331791, 1.332751, 1.333711, 1.334671, 1.335631, 1.336591, 1.337551, 1.338512, 1.339472, 1.340432, 1.341392, 1.342352, 1.343312, 1.344272, 1.345232, 1.346192, 1.347152, 1.348112, 1.349072, 1.350033, 1.350993, 1.351953, 1.352913, 1.353873, 1.354833, 1.355793, 1.356753, 1.357713, 1.358673, 1.359633, 1.360593, 1.361553, 1.362514, 1.363474, 1.364434, 1.365394, 1.366354, 1.367314, 1.368274, 1.369234, 1.370194, 1.371154, 1.372114, 1.373074, 1.374035, 1.374995, 1.375955, 1.376915, 1.377875, 1.378835, 1.379795, 1.380755, 1.381715, 1.382675, 1.383635, 1.384595, 1.385555, 1.386516, 1.387476, 1.388436, 1.389396, 1.390356, 1.391316, 1.392276, 1.393236, 1.394196, 1.395156, 1.396116, 1.397076, 1.398037, 1.398997, 1.399957, 1.400917, 1.401877, 1.402837, 1.403797, 1.404757, 1.405717, 1.406677, 1.407637, 1.408597, 1.409557, 1.410518, 1.411478, 1.412438, 1.413398, 1.414358, 1.415318, 1.416278, 1.417238, 1.418198, 1.419158, 1.420118, 1.421078, 1.422039, 1.422999, 1.423959, 1.424919, 1.425879, 1.426839, 1.427799, 1.428759, 1.429719, 1.430679, 1.431639, 1.432599, 1.433559, 1.434520, 1.435480, 1.436440, 1.437400, 1.438360, 1.439320, 1.440280, 1.441240, 1.442200, 1.443160, 1.444120, 1.445080, 1.446041, 1.447001, 1.447961, 1.448921, 1.449881, 1.450841, 1.451801, 1.452761, 1.453721, 1.454681, 1.455641, 1.456601, 1.457561, 1.458522, 1.459482, 1.460442, 1.461402, 1.462362, 1.463322, 1.464282, 1.465242, 1.466202, 1.467162, 1.468122, 1.469082, 1.470043, 1.471003, 1.471963, 1.472923, 1.473883, 1.474843, 1.475803, 1.476763, 1.477723, 1.478683, 1.479643, 1.480603, 1.481563, 1.482524, 1.483484, 1.484444, 1.485404, 1.486364, 1.487324, 1.488284, 1.489244, 1.490204, 1.491164, 1.492124, 1.493084, 1.494045, 1.495005, 1.495965, 1.496925, 1.497885, 1.498845, 1.499805, 1.500765, 1.501725, 1.502685, 1.503645, 1.504605, 1.505565, 1.506526, 1.507486, 1.508446, 1.509406, 1.510366, 1.511326, 1.512286, 1.513246, 1.514206, 1.515166, 1.516126, 1.517086, 1.518047, 1.519007, 1.519967, 1.520927, 1.521887, 1.522847, 1.523807, 1.524767, 1.525727, 1.526687, 1.527647, 1.528607, 1.529567, 1.530528, 1.531488, 1.532448, 1.533408, 1.534368, 1.535328, 1.536288, 1.537248, 1.538208, 1.539168, 1.540128, 1.541088, 1.542049, 1.543009, 1.543969, 1.544929, 1.545889, 1.546849, 1.547809, 1.548769, 1.549729, 1.550689, 1.551649, 1.552609, 1.553569, 1.554530, 1.555490, 1.556450, 1.557410, 1.558370, 1.559330, 1.560290, 1.561250, 1.562210, 1.563170, 1.564130, 1.565090, 1.566051, 1.567011, 1.567971, 1.568931, 1.569891, 1.570851, 1.571811, 1.572771, 1.573731, 1.574691, 1.575651, 1.576611, 1.577571, 1.578532, 1.579492, 1.580452, 1.581412, 1.582372, 1.583332, 1.584292, 1.585252, 1.586212, 1.587172, 1.588132, 1.589092, 1.590053, 1.591013, 1.591973, 1.592933, 1.593893, 1.594853, 1.595813, 1.596773, 1.597733, 1.598693, 1.599653, 1.600613, 1.601573, 1.602534, 1.603494, 1.604454, 1.605414, 1.606374, 1.607334, 1.608294, 1.609254, 1.610214, 1.611174, 1.612134, 1.613094, 1.614055, 1.615015, 1.615975, 1.616935, 1.617895, 1.618855, 1.619815, 1.620775, 1.621735, 1.622695, 1.623655, 1.624615, 1.625575, 1.626536, 1.627496, 1.628456, 1.629416, 1.630376, 1.631336, 1.632296, 1.633256, 1.634216, 1.635176, 1.636136, 1.637096, 1.638057, 1.639017, 1.639977, 1.640937, 1.641897, 1.642857, 1.643817, 1.644777, 1.645737, 1.646697, 1.647657, 1.648617, 1.649577, 1.650538, 1.651498, 1.652458, 1.653418, 1.654378, 1.655338, 1.656298, 1.657258, 1.658218, 1.659178, 1.660138, 1.661098, 1.662059, 1.663019, 1.663979, 1.664939, 1.665899, 1.666859, 1.667819, 1.668779, 1.669739, 1.670699, 1.671659, 1.672619, 1.673579, 1.674540, 1.675500, 1.676460, 1.677420, 1.678380, 1.679340, 1.680300, 1.681260, 1.682220, 1.683180, 1.684140, 1.685100, 1.686061, 1.687021, 1.687981, 1.688941, 1.689901, 1.690861, 1.691821, 1.692781, 1.693741, 1.694701, 1.695661, 1.696621, 1.697581, 1.698542, 1.699502, 1.700462, 1.701422, 1.702382, 1.703342, 1.704302, 1.705262, 1.706222, 1.707182, 1.708142, 1.709102, 1.710063, 1.711023, 1.711983, 1.712943, 1.713903, 1.714863, 1.715823, 1.716783, 1.717743, 1.718703, 1.719663, 1.720623, 1.721583, 1.722544, 1.723504, 1.724464, 1.725424, 1.726384, 1.727344, 1.728304, 1.729264, 1.730224, 1.731184, 1.732144, 1.733104, 1.734065, 1.735025, 1.735985, 1.736945, 1.737905, 1.738865, 1.739825, 1.740785, 1.741745, 1.742705, 1.743665, 1.744625, 1.745585, 1.746546, 1.747506, 1.748466, 1.749426, 1.750386, 1.751346, 1.752306, 1.753266, 1.754226, 1.755186, 1.756146, 1.757106, 1.758067, 1.759027, 1.759987, 1.760947, 1.761907, 1.762867, 1.763827, 1.764787, 1.765747, 1.766707, 1.767667, 1.768627, 1.769587, 1.770548, 1.771508, 1.772468, 1.773428, 1.774388, 1.775348, 1.776308, 1.777268, 1.778228, 1.779188, 1.780148, 1.781108, 1.782069, 1.783029, 1.783989, 1.784949, 1.785909, 1.786869, 1.787829, 1.788789, 1.789749, 1.790709, 1.791669, 1.792629, 1.793589, 1.794550, 1.795510, 1.796470, 1.797430, 1.798390, 1.799350, 1.800310, 1.801270, 1.802230, 1.803190, 1.804150, 1.805110, 1.806071, 1.807031, 1.807991, 1.808951, 1.809911, 1.810871, 1.811831, 1.812791, 1.813751, 1.814711, 1.815671, 1.816631, 1.817591, 1.818552, 1.819512, 1.820472, 1.821432, 1.822392, 1.823352, 1.824312, 1.825272, 1.826232, 1.827192, 1.828152, 1.829112, 1.830073, 1.831033, 1.831993, 1.832953, 1.833913, 1.834873, 1.835833, 1.836793, 1.837753, 1.838713, 1.839673, 1.840633, 1.841593, 1.842554, 1.843514, 1.844474, 1.845434, 1.846394, 1.847354, 1.848314, 1.849274, 1.850234, 1.851194, 1.852154, 1.853114, 1.854075, 1.855035, 1.855995, 1.856955, 1.857915, 1.858875, 1.859835, 1.860795, 1.861755, 1.862715, 1.863675, 1.864635, 1.865595, 1.866556, 1.867516, 1.868476, 1.869436, 1.870396, 1.871356, 1.872316, 1.873276, 1.874236, 1.875196, 1.876156, 1.877116, 1.878077, 1.879037, 1.879997, 1.880957, 1.881917, 1.882877, 1.883837, 1.884797, 1.885757, 1.886717, 1.887677, 1.888637, 1.889597, 1.890558, 1.891518, 1.892478, 1.893438, 1.894398, 1.895358, 1.896318, 1.897278, 1.898238, 1.899198, 1.900158, 1.901118, 1.902079, 1.903039, 1.903999, 1.904959, 1.905919, 1.906879, 1.907839, 1.908799, 1.909759, 1.910719, 1.911679, 1.912639, 1.913599, 1.914560, 1.915520, 1.916480, 1.917440, 1.918400, 1.919360, 1.920320, 1.921280, 1.922240, 1.923200, 1.924160, 1.925120, 1.926081, 1.927041, 1.928001, 1.928961, 1.929921, 1.930881, 1.931841, 1.932801, 1.933761, 1.934721, 1.935681, 1.936641, 1.937601, 1.938562, 1.939522, 1.940482, 1.941442, 1.942402, 1.943362, 1.944322, 1.945282, 1.946242, 1.947202, 1.948162, 1.949122, 1.950083, 1.951043, 1.952003, 1.952963, 1.953923, 1.954883, 1.955843, 1.956803, 1.957763, 1.958723, 1.959683, 1.960643, 1.961603, 1.962564, 1.963524, 1.964484, 1.965444, 1.966404, 1.967364, 1.968324, 1.969284, 1.970244, 1.971204, 1.972164, 1.973124, 1.974085, 1.975045, 1.976005, 1.976965, 1.977925, 1.978885, 1.979845, 1.980805, 1.981765, 1.982725, 1.983685, 1.984645, 1.985605, 1.986566, 1.987526, 1.988486, 1.989446, 1.990406, 1.991366, 1.992326, 1.993286, 1.994246, 1.995206, 1.996166, 1.997126, 1.998087, 1.999047
0.000000, 0.000000, 0.000000, 0.000000, 0.000000, 0.000000, 0.000000, 0.000000, 0.000000, 0.000000, 0.000000, 0.000000, 0.000000, 0.000000, 0.000000, 0.000000, 0.000000, 0.000000, 0.000000, 0.000000, 0.000000, 0.000000, 0.000000, 0.000000, 0.000000, 0.000000, 0.000000, 0.000000, 0.000000, 0.000000, 0.000000, 0.000000, 0.000000, 0.000000, 0.000000, 0.000000, 0.000000, 0.000000, 0.000000, 0.000000, 0.000000, 0.000000, 0.000000, 0.000000, 0.000000, 0.000000, 0.000000, 0.000000, 0.000000, 0.000000, 0.000000, 0.000000, 0.000000, 0.000000, 0.000000, 0.000000, 0.000000, 0.000000, 0.000000, 0.000000, 0.000000, 0.000000, 0.000000, 0.000000, 0.000000, 0.000000, 0.000000, 0.000000, 0.000000, 0.000000, 0.000000, 0.000000, 0.000000, 0.000000, 0.000000, 0.000000, 0.000000, 0.000000, 0.000000, 0.000000, 0.000000, 0.000000, 0.000000, 0.000000, 0.000000, 0.000000, 0.000000, 0.000000, 0.000000, 0.000000, 0.000000, 0.000000, 0.000000, 0.000000, 0.000000, 0.000000, 0.000000, 0.000000, 0.000000, 0.000000, 0.000000, 0.000000, 0.000000, 0.000000, 0.000000, 313.609144, 1247.073975, 2789.387905, 4929.634926, 7656.991982, 10960.721366, 14830.172972, 19254.784306, 24224.080456, 29727.673721, 35755.263927, 42296.638291, 49341.670757, 56880.322675, 64902.642552, 73398.765193, 82358.912292, 91773.392203, 101632.599798, 111927.016351, 122647.209320, 133783.831643, 145327.622420, 157269.406581, 169600.094698, 182310.682848, 195392.252244, 208835.967781, 222633.079756, 236774.923269, 251252.917889, 266058.567484, 281183.459850, 296619.265198, 312357.737819, 328390.715527, 344710.119256, 361307.952868, 378176.302749, 395307.335980, 412693.302244, 430326.533267, 448199.442313, 466304.523949, 484634.353684, 503181.586413, 521938.957788, 540899.283798, 560055.460249, 579400.462513, 598927.345149, 618629.240286, 638499.358918, 658530.990547, 678717.502607, 699052.340170, 719529.025591, 740141.157107, 760882.409741, 781746.535013, 802727.360373, 823818.788882, 845014.798859, 866309.442686, 887696.847261, 909171.213762, 930726.817061, 952358.005351, 974059.199779, 995824.894064, 1017649.654120, 1039528.117669, 1061454.994115, 1083425.064690, 1105433.180908, 1127474.264640, 1149543.307777, 1171635.371844, 1193745.587618, 1215869.154738, 1238001.341312, 1260137.483523, 1282272.984384, 1304403.313966, 1326524.009507, 1348630.674555, 1370718.978541, 1392784.656351, 1414823.507892, 1436831.397655, 1458804.254280, 1480738.070611, 1502628.905859, 1524472.880825, 1546266.178680, 1568005.044962, 1589685.787171, 1611304.774355, 1632858.436700, 1654343.265114, 1675755.810818, 1697092.684165, 1718350.554215, 1739526.149692, 1760616.257778, 1781617.723669, 1802527.450134, 1823342.397068, 1844059.581047, 1864676.074881, 1885189.007291, 1905595.564268, 1925892.986286, 1946078.568018, 1966149.658379, 1986103.660101, 2005938.029297, 2025650.275033, 2045237.958889, 2064698.694534, 2084030.147522, 2103230.035193, 2122296.125332, 2141226.236132, 2160018.235792, 2178670.042094, 2197179.621973, 2215544.991090, 2233764.213405, 2251835.400727, 2269756.711060, 2287526.349278, 2305142.567209, 2322603.662625, 2339907.978795, 2357053.904035, 2374039.871247, 2390864.357472, 2407525.883428, 2424023.014178, 2440354.363195, 2456518.583764, 2472514.371151, 2488340.462850, 2503995.638209, 2519478.718056, 2534788.564330, 2549924.079712, 2564884.207265, 2579667.924952, 2594274.246522, 2608702.228383, 2622950.964761, 2637019.587227, 2650907.264212, 2664613.200536, 2678136.636921, 2691476.849511, 2704633.150353, 2717604.897129, 2730391.478535, 2742992.315833, 2755406.864867, 2767634.615728, 2779675.092433, 2791527.852599, 2803192.487130, 2814668.619905, 2825955.903717, 2837054.016420, 2847962.672557, 2858681.617420, 2869210.626384, 2879549.504479, 2889698.085959, 2899656.233875, 2909423.839639, 2919000.822737, 2928387.135836, 2937582.758711, 2946587.696428, 2955401.981132, 2964025.671704, 2972458.853415, 2980701.637590, 2988754.161264, 2996616.586856, 3004289.101198, 3011771.913239, 3019065.257574, 3026169.392739, 3033084.600617, 3039811.186073, 3046349.476601, 3052699.821961, 3058862.593826, 3064838.185424, 3070627.012996, 3076229.514595, 3081646.147804, 3086877.390708, 3091923.741586, 3096785.718600, 3101463.859488, 3105958.721257, 3110270.879885, 3114400.929777, 3118349.481476, 3122117.164315, 3125704.625525, 3129112.529513, 3132341.557551, 3135392.407447, 3138265.793240, 3140962.444874, 3143483.107890, 3145828.543478, 3147999.528380, 3149996.853601, 3151821.324592, 3153473.760969, 3154954.996213, 3156265.877384, 3157407.264822, 3158380.031861, 3159185.064642, 3159823.264370, 3160295.544178, 3160602.828564, 3160746.054004, 3160726.168711, 3160544.132406, 3160200.916090, 3159697.501813, 3159034.882459, 3158214.059980, 3157236.041503, 3156101.847066, 3154812.506309, 3153369.057808, 3151772.548787, 3150024.034831, 3148124.579597, 3146075.254532, 3143877.138591, 3141531.322576, 3139038.905829, 3136400.992346, 3133618.693330, 3130693.126987, 3127625.418340, 3124416.699034, 3121068.107157, 3117580.787056, 3113955.888593, 3110194.563444, 3106297.970520, 3102267.274387, 3098103.644431, 3093808.254638, 3089382.283372, 3084826.913161, 3080143.330482, 3075332.725544, 3070396.293360, 3065335.233832, 3060150.748801, 3054844.043319, 3049416.325493, 3043868.806322, 3038202.699528, 3032419.221395, 3026519.590608, 3020505.027924, 3014376.752957, 3008135.987754, 3001783.956610, 2995321.884985, 2988750.999309, 2982072.526789, 2975287.695219, 2968397.732785, 2961403.867877, 2954307.330439, 2947109.354536, 2939811.171460, 2932414.012358, 2924919.108366, 2917327.690494, 2909640.989519, 2901860.235881, 2893986.659583, 2886021.490057, 2877965.951845, 2869821.267903, 2861588.661860, 2853269.355728, 2844864.569747, 2836375.522232, 2827803.429413, 2819149.505288, 2810414.961461, 2801601.007616, 2792708.854359, 2783739.707965, 2774694.771732, 2765575.246337, 2756382.329746, 2747117.217114, 2737781.100702, 2728375.169784, 2718900.610568, 2709358.604834, 2699750.329927, 2690076.960850, 2680339.668930, 2670539.621707, 2660677.982830, 2650755.911960, 2640774.564669, 2630735.092342, 2620638.642134, 2610486.357568, 2600279.377536, 2590018.836282, 2579705.863506, 2569341.584284, 2558927.118989, 2548463.583219, 2537952.087722, 2527393.738329, 2516789.635864, 2506140.876057, 2495448.549540, 2484713.741756, 2473937.532894, 2463120.997832, 2452265.206074, 2441371.221696, 2430440.103287, 2419472.903883, 2408470.669654, 2397434.441027, 2386365.253095, 2375264.135011, 2364132.109922, 2352970.194904, 2341779.400895, 2330560.732635, 2319315.188601, 2308043.761465, 2296747.440014, 2285427.205459, 2274084.032583, 2262718.889980, 2251332.740037, 2239926.538921, 2228501.236561, 2217057.776640, 2205597.096586, 2194120.125287, 2182627.783776, 2171120.988239, 2159600.648110, 2148067.666015, 2136522.937727, 2124967.352117, 2113401.791105, 2101827.129610, 2090244.235766, 2078653.973409, 2067057.198460, 2055454.759453, 2043847.498087, 2032236.249227, 2020621.840900, 2009005.094292, 1997386.823750, 1985767.836791, 1974148.933155, 1962530.904020, 1950914.534873, 1939300.604143, 1927689.883135, 1916083.136000, 1904481.119725, 1892884.584111, 1881294.271754, 1869710.918075, 1858135.252886, 1846567.998724, 1835009.870495, 1823461.576073, 1811923.816317, 1800397.285079, 1788882.669227, 1777380.648654, 1765891.896303, 1754417.077627, 1742956.848970, 1731511.860873, 1720082.756900, 1708670.173439, 1697274.739699, 1685897.077704, 1674537.802285, 1663197.521074, 1651876.834501, 1640576.336997, 1629296.616361, 1618038.252567, 1606801.818598, 1595587.880475, 1584396.997274, 1573229.721147, 1562086.597355, 1550968.164282, 1539874.953346, 1528807.488045, 1517766.285454, 1506751.855941, 1495764.702989, 1484805.323219, 1473874.206403, 1462971.835485, 1452098.686598, 1441255.229083, 1430441.925590, 1419659.232133, 1408907.597914, 1398187.465449, 1387499.270589, 1376843.442549, 1366220.403934, 1355630.570763, 1345074.352498, 1334552.152062, 1324064.365667, 1313611.383072, 1303193.587632, 1292811.356256, 1282465.059435, 1272155.061276, 1261881.719523, 1251645.385590, 1241446.404592, 1231285.115346, 1221161.850344, 1211076.935917, 1201030.692211, 1191023.433213, 1181055.466787, 1171127.094699, 1161238.612654, 1151390.310327, 1141582.471396, 1131815.373621, 1122089.288847, 1112404.483007, 1102761.216181, 1093159.742637, 1083600.310862, 1074083.163605, 1064608.537908, 1055176.665152, 1045787.771015, 1036442.075071, 1027139.791543, 1017881.129150, 1008666.291073, 999495.474984, 990368.873077, 981286.672108, 972249.053424, 963256.192996, 954308.261683, 945405.425300, 936547.844195, 927735.673534, 918969.063344, 910248.158557, 901573.099049, 892944.019685, 884361.050359, 875824.316007, 867333.936164, 858890.025612, 850492.694404, 842142.047770, 833838.186143, 825581.205208, 817371.195928, 809208.244590, 801092.432837, 793023.837791, 785002.532234, 777028.584285, 769102.057596, 761223.011402, 753391.500562, 745607.575601, 737871.282755, 730182.664008, 722541.757136, 714948.595384, 707403.207817, 699905.619536, 692455.851551, 685053.920808, 677699.840234, 670393.618770, 663135.261406, 655924.769222, 648762.139491, 641647.366031, 634580.438697, 627561.343583, 620590.063111, 613666.576071, 606790.857671, 599962.879568, 593182.609920, 586450.013429, 579765.051088, 573127.680268, 566537.855217, 559995.526834, 553500.642703, 547053.147129, 540652.981176, 534300.082701, 527994.386395, 521735.823829, 515524.323699, 509359.811588, 503242.210032, 497171.438610, 491147.413981, 485170.049925, 479239.257378, 473354.944477, 467517.016593, 461725.376308, 455979.923379, 450280.555000, 444627.165741, 439019.647575, 433457.889917, 427941.779662, 422471.201215, 417046.036532, 411666.165154, 406331.464230, 401041.808561, 395797.070648, 390597.120715, 385441.826748, 380331.054529, 375264.667669, 370242.527646, 365264.493836, 360330.423558, 355440.172138, 350593.592889, 345790.537160, 341030.854379, 336314.392086, 331640.995964, 327010.509880, 322422.775915, 317877.634396, 313374.923787, 308914.480767, 304496.140460, 300119.736340, 295785.100266, 291492.062508, 287240.451781, 283030.095273, 278860.818672, 274732.446232, 270644.801079, 266597.704841, 262590.977739, 258624.438687, 254697.905324, 250811.194041, 246964.120022, 243156.497272, 239388.138649, 235658.855681, 231968.458436, 228316.756180, 224703.557108, 221128.668352, 217591.896011, 214093.045169, 210631.919928, 207208.323420, 203822.057857, 200472.925090, 197160.726056, 193885.260699, 190646.328199, 187443.726999, 184277.254838, 181146.708779, 178051.885243, 174992.580035, 171968.588203, 168979.703579, 166025.719804, 163106.429989, 160221.626681, 157371.101882, 154554.647068, 151772.053209, 149023.110788, 146307.609820, 143625.340310, 140976.092027, 138359.654109, 135775.815378, 133224.364367, 130705.089345, 128217.778339, 125762.219163, 123338.199442, 120945.506583, 118583.927430, 116253.248858, 113953.257666, 111683.740527, 109444.484007, 107235.274585, 105055.898667, 102906.142606, 100785.792718, 98694.635399, 96632.457182, 94599.044516, 92594.183903, 90617.661927, 88669.265262, 86748.780699, 84855.995159, 82990.695716, 81152.669605, 79341.704182, 77557.587013, 75800.105894, 74069.048851, 72364.204154, 70685.360332, 69032.306188, 67404.830816, 65802.723618, 64225.774320, 62673.773012, 61146.510118, 59643.776429, 58165.363117, 56711.061751, 55280.664310, 53873.963196, 52490.751250, 51130.821765, 49793.968515, 48479.985760, 47188.668241, 45919.811207, 44673.210423, 43448.662189, 42245.963347, 41064.911297, 39905.304007, 38766.940016, 37649.618391, 36553.138826, 35477.301633, 34421.907740, 33386.758701, 32371.656707, 31376.404595, 30400.805858, 29444.664654, 28507.785892, 27589.975250, 26691.039029, 25810.784251, 24949.018665, 24105.550758, 23280.189767, 22472.745687, 21683.029280, 20910.852076, 20156.026204, 19418.364623, 18697.681122, 17993.790276, 17306.507451, 16635.648814, 15981.031333, 15342.472787, 14719.791766, 14112.807781, 13521.341411, 12945.213920, 12384.247429, 11838.264935, 11307.090325, 10790.548377, 10288.464770, 9800.666094, 9326.979852, 8867.234207, 8421.258215, 7988.881954, 7569.936405, 7164.253454, 6771.665891, 6392.007420, 6025.112653, 5670.817114, 5328.957305, 4999.370977, 4681.896651, 4376.373772, 4082.642747, 3800.544958, 3529.922760, 3270.619491, 3022.479471, 2785.348013, 2559.071279, 2343.496305, 2138.471237, 1943.845197, 1759.468282, 1585.191570, 1420.867114, 1266.347947, 1121.488080, 986.142519, 860.167419, 743.419872, 635.757933, 537.040656, 447.128102, 365.881335, 293.162424, 228.834449, 172.761496, 124.808642, 84.841930, 52.728445, 28.336275, 11.534518, 2.193273, 0.183648, 5.377755, 17.648707, 36.870626, 62.918641, 95.668889, 134.998500, 180.785609, 232.909349, 291.249854, 355.688255, 426.106677, 502.388242, 584.417087, 672.078441, 765.258473, 863.844346, 967.724221, 1076.787260, 1190.923621, 1310.024464, 1433.981944, 1562.689211, 1696.040294, 1833.930145, 1976.254778, 2122.911172, 2273.797272, 2428.811982, 2587.855164, 2750.827627, 2917.631133, 3088.168415, 3262.343442, 3440.061027, 3621.226895, 3805.747736, 3993.531206, 4184.485923, 4378.521470, 4575.548395, 4775.478203, 4978.223209, 5183.696423, 5391.811992, 5602.484978, 5815.631350, 6031.167975, 6249.012613, 6469.083910, 6691.301393, 6915.585474, 7141.857847, 7370.041039, 7600.058350, 7831.833983, 8065.293051, 8300.361569, 8536.966458, 8775.035541, 9014.497546, 9255.281992, 9497.318914, 9740.539446, 9984.875597, 10230.260213, 10476.626976, 10723.910390, 10972.045781, 11220.969285, 11470.617843, 11720.929438, 11971.842938, 12223.297882, 12475.234632, 12727.594362, 12980.319063, 13233.351534, 13486.635384, 13740.115024, 13993.735647, 14247.443090, 14501.184039, 14754.905979, 15008.557158, 15262.086591, 15515.444045, 15768.580044, 16021.445853, 16273.993482, 16526.175700, 16777.946047, 17029.258755, 17280.068788, 17530.331828, 17780.004273, 18029.043234, 18277.406527, 18525.052671, 18771.940884, 19018.031121, 19263.284019, 19507.660888, 19751.123721, 19993.635192, 20235.158646, 20475.658102, 20715.098241, 20953.444408, 21190.662569, 21426.719235, 21661.581623, 21895.217588, 22127.595604, 22358.684761, 22588.454761, 22816.875906, 23043.919097, 23269.555827, 23493.758368, 23716.499620, 23937.752978, 24157.492440, 24375.692595, 24592.328628, 24807.376313, 25020.812011, 25232.612664, 25442.755743, 25651.218925, 25857.980614, 26063.019787, 26266.315937, 26467.849072, 26667.599699, 26865.548820, 27061.677923, 27255.968976, 27448.404701, 27638.968576, 27827.644300, 28014.416085, 28199.268656, 28382.187247, 28563.157602, 28742.165975, 28919.199126, 29094.244291, 29267.288674, 29438.320094, 29607.326939, 29774.298028, 29939.222597, 30102.090298, 30262.891186, 30421.615712, 30578.254717, 30732.799577, 30885.242421, 31035.575514, 31183.791516, 31329.883499, 31473.844939, 31615.669720, 31755.352128, 31892.886849, 32028.268966, 32161.493745, 32292.556826, 32421.454301, 32548.182619, 32672.738582, 32795.119336, 32915.322369, 33033.345505, 33149.186896, 33262.845041, 33374.318855, 33483.607525, 33590.710549, 33695.627743, 33798.359235, 33898.905466, 33997.267181, 34093.445428, 34187.441553, 34279.257184, 34368.894229, 34456.354893, 34541.641661, 34624.757293, 34705.704822, 34784.487549, 34861.109041, 34935.573124, 35007.883877, 35078.045600, 35146.062848, 35211.940426, 35275.683373, 35337.296961, 35396.786689, 35454.158279, 35509.417672, 35562.571022, 35613.624756, 35662.585626, 35709.460508, 35754.256492, 35796.980885, 35837.641206, 35876.245184, 35912.800761, 35947.316084, 35979.799499, 36010.259267, 36038.703846, 36065.141965, 36089.582508, 36112.034507, 36132.507136, 36151.009704, 36167.551650, 36182.142536, 36194.792158, 36205.510923, 36214.309100, 36221.197075, 36226.185402, 36229.284799, 36230.506152, 36229.860513, 36227.359106, 36223.013325, 36216.834307, 36208.833133, 36199.021292, 36187.410365, 36174.012020, 36158.838006, 36141.900143, 36123.210320, 36102.780483, 36080.622690, 36056.749579, 36031.173659, 36003.907435, 35974.963516, 35944.354603, 35912.093497, 35878.193097, 35842.666398, 35805.526496, 35766.786438, 35726.459145, 35684.557792, 35641.095616, 35596.085913, 35549.542026, 35501.477349, 35451.905320, 35400.839418, 35348.293164, 35294.280247, 35238.814379, 35181.909272, 35123.578678, 35063.836396, 35002.696261, 34940.172148, 34876.277970, 34811.027673, 34744.435214, 34676.514490, 34607.279479, 34536.744180, 34464.922611, 34391.828799, 34317.476783, 34241.880608, 34165.054324, 34087.011983, 34007.767697, 33927.335596, 33845.729777, 33762.964342, 33679.053392, 33594.011027, 33507.851349, 33420.588453, 33332.236431, 33242.809372, 33152.321365, 33060.786488, 32968.218809, 32874.632389, 32780.041278, 32684.459515, 32587.901129, 32490.380134, 32391.910533, 32292.506245, 32192.181084, 32090.948917, 31988.823575, 31885.818853, 31781.948508, 31677.226252, 31571.665754, 31465.280637, 31358.084482, 31250.091008, 31141.313852, 31031.766563, 30921.462657, 30810.415617, 30698.638896, 30586.145909, 30472.950044, 30359.064654, 30244.502994, 30129.278100, 30013.403083, 29896.891005, 29779.754872, 29662.007622, 29543.662131, 29424.731206, 29305.227585, 29185.163934, 29064.553076, 28943.407806, 28821.740755, 28699.564514, 28576.891629, 28453.734608, 28330.105919, 28206.017995, 28081.483232, 27956.513925, 27831.121918, 27705.319199, 27579.117727, 27452.529380, 27325.565944, 27198.239117, 27070.560498, 26942.541590, 26814.193789, 26685.528647, 26556.557860, 26427.292800, 26297.744783, 26167.925066, 26037.844853, 25907.515295, 25776.947492, 25646.152500, 25515.141302, 25383.924498, 25252.512722, 25120.916609, 24989.146713, 24857.213503, 24725.127362, 24592.898587, 24460.537382, 24328.053862, 24195.458113, 24062.760270, 23929.970285, 23797.098023, 23664.153277, 23531.145760, 23398.085113, 23264.980900, 23131.842611, 22998.679659, 22865.501331, 22732.316834, 22599.135317, 22465.965851, 22332.817423, 22199.698940, 22066.619229, 21933.587031, 21800.611009, 21667.699742, 21534.861728, 21402.105382, 21269.439036, 21136.870938, 21004.409256, 20872.062071, 20739.837383, 20607.743108, 20475.787078, 20343.977074, 20212.320816, 20080.825919, 19949.499922, 19818.350287, 19687.384399, 19556.609570, 19426.033036, 19295.661959, 19165.503417, 19035.564269, 18905.851343, 18776.371407, 18647.131140, 18518.137129, 18389.395869, 18260.913760, 18132.697109, 18004.752123, 17877.085028, 17749.702161, 17622.609621, 17495.813437, 17369.319574, 17243.133935, 17117.262368, 16991.710663, 16866.484560, 16741.589737, 16617.031451, 16492.814915, 16368.945391, 16245.428043, 16122.267938, 15999.470044, 15877.039221, 15754.980226, 15633.297703, 15511.996299, 15391.081004, 15270.556460, 15150.427211, 15030.697741, 14911.372482, 14792.455813, 14673.952067, 14555.865534, 14438.200462, 14320.960774, 14204.150218, 14087.772660, 13971.831891, 13856.331615, 13741.275459, 13626.666960, 13512.509572, 13398.806659, 13285.561524, 13172.777618, 13060.458219, 12948.606499, 12837.225564, 12726.318458, 12615.888164, 12505.937603, 12396.469637, 12287.487071, 12178.992602, 12070.988797, 11963.478223, 11856.463380, 11749.946701, 11643.930555, 11538.417242, 11433.408998, 11328.907990, 11224.916321, 11121.436086, 11018.469307, 10916.017928, 10814.083836, 10712.668861, 10611.774774, 10511.403293, 10411.556078, 10312.234737, 10213.440814, 10115.175765, 10017.441013, 9920.237928, 9823.567824, 9727.431963, 9631.831551, 9536.767738, 9442.241624, 9348.254255, 9254.806592, 9161.899535, 9069.533945, 8977.710625, 8886.430322, 8795.693725, 8705.501464, 8615.854113, 8526.752187, 8438.196162, 8350.186603, 8262.723960, 8175.808621, 8089.440936, 8003.621216, 7918.349737, 7833.626742, 7749.452442, 7665.827016, 7582.750492, 7500.222716, 7418.243626, 7336.813107, 7255.930987, 7175.597037, 7095.810970, 7016.572440, 6937.881034, 6859.736300, 6782.138046, 6705.085957, 6628.579607, 6552.618546, 6477.202302, 6402.330389, 6328.002305, 6254.217538, 6180.975569, 6108.275738, 6036.117015, 5964.498585, 5893.419602, 5822.879172, 5752.876343, 5683.410111, 5614.479410, 5546.083114, 5478.220037, 5410.889249, 5344.089807, 5277.820588, 5212.080447, 5146.868217, 5082.182715, 5018.022744, 4954.387094, 4891.274544, 4828.683824, 4766.613415, 4705.061901, 4644.027863, 4583.509853, 4523.506391, 4464.015967, 4405.037036, 4346.568024, 4288.607321, 4231.153350, 4174.204560, 4117.759317, 4061.815964, 4006.372825, 3951.428206, 3896.980394, 3843.027659, 3789.568256, 3736.600417, 3684.122286, 3632.132009, 3580.627730, 3529.607567, 3479.069619, 3429.011959, 3379.432641, 3330.329692, 3281.701119, 3233.544927, 3185.859149, 3138.641763, 3091.890728, 3045.603989, 2999.779476, 2954.415103, 2909.508772, 2865.058373, 2821.061780, 2777.516865, 2734.421487, 2691.773494, 2649.570726, 2607.811012, 2566.492177, 2525.612038, 2485.168407, 2445.159091, 2405.581871, 2366.434422, 2327.714464, 2289.419712, 2251.547866, 2214.096609, 2177.063608, 2140.446512, 2104.242949, 2068.450529, 2033.066945, 1998.089934, 1963.517148, 1929.346239, 1895.574858, 1862.200656, 1829.221285, 1796.634401, 1764.437666, 1732.628729, 1701.205083, 1670.164277, 1639.503880, 1609.221451, 1579.314537, 1549.780669, 1520.617366, 1491.822131, 1463.392449, 1435.325886, 1407.620155, 1380.272842, 1353.281535, 1326.643834, 1300.357353, 1274.419721, 1248.828586, 1223.581613, 1198.676483, 1174.110602, 1149.881413, 1125.986453, 1102.423245, 1079.189296, 1056.282096, 1033.699114, 1011.437798, 989.495570, 967.869914, 946.558622, 925.559282, 904.869467, 884.486764, 864.408773, 844.633114, 825.157425, 805.979369, 787.096632, 768.506734, 750.207138, 732.195435, 714.469214, 697.026064, 679.863570, 662.979313, 646.370870, 630.035811, 613.971716, 598.176297, 582.647207, 567.382086, 552.378577, 537.634334, 523.147018, 508.914300, 494.933861, 481.203390, 467.720565, 454.483046, 441.488524, 428.734698, 416.219276, 403.939970, 391.894501, 380.080593, 368.495981, 357.138405, 346.005611, 335.095354, 324.405396, 313.933503, 303.677449, 293.635017, 283.803994, 274.182174, 264.767359, 255.557370, 246.550072, 237.743317, 229.134967, 220.722895, 212.504988, 204.479149, 196.643292, 188.995349, 181.533266, 174.254916, 167.158164, 160.240928, 153.501128, 146.936685, 140.545524, 134.325565, 128.274730, 122.390935, 116.672129, 111.116471, 105.722030, 100.486866, 95.409062, 90.486722, 85.717981, 81.100999, 76.633966, 72.315107, 68.142499, 64.114056, 60.227884, 56.482088, 52.874764, 49.404001, 46.067878, 42.864458, 39.791787, 36.847918, 34.031296, 31.340265, 28.773086, 26.328050, 24.003477, 21.797722, 19.709178, 17.736276, 15.877493, 14.131202, 12.495449, 10.968553, 9.548853, 8.234682, 7.024371, 5.916240, 4.908600, 3.999746, 3.187962, 2.471802, 1.849841, 1.320535, 0.882360, 0.533810, 0.273402, 0.099674, 0.011193, 0.006549, 0.084326, 0.242950, 0.480957, 0.796919, 1.189414, 1.657031, 2.198363, 2.812014, 3.496590, 4.250706, 5.073022, 5.962238, 6.917026, 7.936070, 9.018068, 10.161727, 11.365767, 12.628922, 13.949935, 15.327564, 16.760578, 18.247759, 19.787903, 21.379818, 23.022324, 24.714256, 26.454463, 28.241805, 30.075159, 31.953389, 33.875324, 35.839839, 37.845816, 39.892144, 41.977714, 44.101425, 46.262175, 48.458867, 50.690408, 52.955850, 55.254253, 57.584638, 59.946047, 62.337543, 64.758214, 67.207176, 69.683567, 72.186559, 74.715286, 77.268626, 79.845627, 82.445362, 85.066899, 87.709297, 90.371606, 93.052861, 95.752084, 98.468275, 101.200680, 103.948682, 106.711480, 109.488299, 112.278391, 115.081034, 117.895538, 120.721248, 123.557545, 126.403813, 129.259112, 132.122657, 134.993738, 137.871643, 140.755659, 143.645071, 146.539161, 149.437200, 152.338453, 155.242272, 158.148166, 161.055514, 163.963704, 166.872136, 169.780225, 172.687400, 175.593105, 178.496800, 181.397959, 184.295969, 187.190240, 190.080225, 192.965380, 195.845167, 198.719050, 201.586500, 204.446985, 207.299980, 210.144983, 212.981588, 215.809338, 218.627785, 221.436491, 224.235032, 227.022998, 229.799995, 232.565642, 235.319578, 238.061375, 240.790590, 243.506837, 246.209736, 248.898910, 251.573985, 254.234589, 256.880354, 259.510910, 262.125899, 264.725025, 267.307967, 269.874402, 272.424011, 274.956482, 277.471508, 279.968788, 282.448028, 284.908937, 287.351250, 289.774727, 292.179118, 294.564184, 296.929697, 299.275441, 301.601211, 303.906814, 306.192072, 308.456814, 310.700752, 312.923631, 315.125233, 317.305337, 319.463716, 321.600141, 323.714374, 325.806169, 327.875271, 329.921494, 331.944872, 333.945298, 335.922666, 337.876894, 339.807923, 341.715717, 343.600272, 345.461609, 347.299785, 349.114555, 350.905634, 352.672900, 354.416215, 356.135426, 357.830359, 359.500815, 361.146569, 362.767362, 364.362983, 365.933690, 367.479494, 369.000359, 370.496271, 371.967239, 373.413302, 374.834529, 376.231025, 377.602933, 378.950196, 380.272550, 381.569980, 382.842466, 384.089981, 385.312489, 386.509944, 387.682287, 388.829440, 389.951327, 391.048097, 392.119831, 393.166550, 394.188283, 395.185069, 396.156953, 397.103992, 398.026251, 398.923808, 399.796714, 400.644935, 401.468509, 402.267479, 403.041887, 403.791776, 404.517186, 405.218158, 405.894727, 406.546929, 407.174859, 407.778618, 408.358282, 408.913931, 409.445653, 409.953539, 410.437690, 410.898212, 411.335219, 411.748824, 412.139085, 412.506098, 412.849969, 413.170803, 413.468708, 413.743794, 413.996172, 414.225953, 414.433249, 414.618163, 414.780796, 414.921248, 415.039622, 415.136015, 415.210521, 415.263229, 415.294224, 415.303586, 415.291399, 415.257853, 415.203101, 415.127282, 415.030538, 414.913022, 414.774896, 414.616334, 414.437521, 414.238654, 414.019881, 413.781233, 413.522842, 413.244838, 412.947349, 412.630495, 412.294390, 411.939137, 411.564834, 411.171568, 410.759572, 410.329065, 409.880218, 409.413208, 408.928221, 408.425455, 407.905118, 407.367433, 406.812636, 406.240925, 405.652294, 405.046861, 404.424755, 403.786090, 403.130968, 402.459474, 401.771672, 401.067610, 400.347308, 399.610997, 398.859003, 398.091499, 397.308673, 396.510726, 395.697880, 394.870377, 394.028484, 393.172495, 392.302691, 391.419018, 390.521572, 389.610507, 388.685968, 387.748084, 386.796972, 385.832730, 384.855436, 383.865148, 382.862024, 381.846392, 380.818418, 379.778267, 378.726109, 377.662123, 376.586494, 375.499416, 374.401095, 373.291743, 372.171455, 371.040348, 369.898580, 368.746310, 367.583692, 366.410878, 365.228016, 364.035251, 362.832724, 361.620581, 360.399012, 359.168175, 357.928224, 356.679313, 355.421598, 354.155232, 352.880370, 351.597166, 350.305776, 349.006355, 347.699058, 346.384042, 345.061464, 343.731482, 342.394254, 341.049940, 339.698702, 338.340702, 336.976097, 335.605001, 334.227543, 332.843860, 331.454080, 330.058328, 328.656723, 327.249379, 325.836400, 324.417886, 322.993989, 321.564931, 320.130866, 318.691958, 317.248372, 315.800288, 314.347892, 312.891382, 311.430968, 309.966864, 308.499079, 307.027670, 305.552745, 304.074398, 302.592710, 301.107743, 299.619542, 298.128130, 296.633508, 295.135755, 293.635226, 292.132076, 290.626455, 289.118530, 287.608484, 286.096520, 284.582865, 283.067770, 281.551513, 280.034086, 278.515449, 276.995709, 275.474962, 273.953287, 272.430745, 270.907377, 269.383200, 267.858207, 266.332414, 264.806138, 263.279524, 261.752682, 260.225727, 258.698785, 257.171987, 255.645480, 254.119421, 252.593984, 251.069246, 249.545199, 248.021938, 246.499558, 244.978149, 243.457793, 241.938572, 240.420557, 238.903815, 237.388409, 235.874479, 234.362136, 232.851471, 231.342579, 229.835554, 228.330490, 226.827487, 225.326642, 223.828060, 222.331827, 220.837996, 219.346648, 217.857860, 216.371710, 214.888270, 213.407613, 211.929805, 210.454911, 208.982990, 207.514120, 206.048376, 204.585822, 203.126519, 201.670527, 200.217905, 198.768709, 197.322994, 195.880812, 194.442222, 193.007327, 191.576208, 190.148944, 188.725620, 187.306325, 185.891157, 184.480219, 183.073621, 181.671484, 180.273828, 178.880603, 177.491842, 176.107565, 174.727780, 173.352480, 171.981641, 170.615221, 169.253156, 167.895391, 166.542163, 165.193595, 163.849760, 162.510744, 161.176651, 159.847606, 158.523756, 157.205272, 155.892355, 154.585069, 153.283199, 151.986768, 150.695796, 149.410285, 148.130219, 146.855562, 145.586251, 144.322195, 143.063284, 141.809705, 140.561604, 139.319014, 138.081973, 136.850530, 135.624744, 134.404686, 133.190443, 131.982118, 130.779782, 129.583308, 128.392701, 127.207978, 126.029156, 124.856242, 123.689239, 122.528143, 121.372943, 120.223617, 119.080215, 117.942814, 116.811439, 115.686118, 114.566883, 113.453767, 112.346810, 111.246056, 110.151554, 109.063348, 107.981391, 106.905675, 105.836205, 104.772979, 103.715992, 102.665229, 101.620670, 100.582285, 99.550036, 98.523926, 97.504024, 96.490333, 95.482859, 94.481607, 93.486590, 92.497819, 91.515316, 90.539102, 89.569208, 88.605606, 87.648285, 86.697252, 85.752515, 84.814081, 83.881959, 82.956156, 82.036683, 81.123548, 80.216752, 79.316264, 78.422072, 77.534159, 76.652505, 75.777084, 74.907862, 74.044801, 73.187853, 72.336966, 71.492178, 70.653555, 69.821107, 68.994853, 68.174822, 67.361050, 66.553588, 65.752498, 64.957855, 64.169716, 63.387893, 62.612313, 61.842931, 61.079683, 60.322489, 59.571248, 58.825839, 58.086114, 57.351897, 56.623201, 55.900260, 55.183083, 54.471694, 53.766138, 53.066482, 52.372823, 51.685287, 51.004034, 50.329238, 49.660623, 48.998044, 48.341470, 47.690853, 47.046126
