# Supplementary material for: Non-classical microwave–optical photon pair generation with a chip-scale transducer
Source: Springer Nature journal article supplement (doi:10.1038/s41567-024-02409-z), 2024-02-23
Supplement: MOESM2 [file 41567_2024_2409_MOESM2_ESM.zip › FigS7/figS7b_data.txt]

-5.000000, -4.916667, -4.833333, -4.750000, -4.666667, -4.583333, -4.500000, -4.416667, -4.333333, -4.250000, -4.166667, -4.083333, -4.000000, -3.916667, -3.833333, -3.750000, -3.666667, -3.583333, -3.500000, -3.416667, -3.333333, -3.250000, -3.166667, -3.083333, -3.000000, -2.916667, -2.833333, -2.750000, -2.666667, -2.583333, -2.500000, -2.416667, -2.333333, -2.250000, -2.166667, -2.083333, -2.000000, -1.916667, -1.833333, -1.750000, -1.666667, -1.583333, -1.500000, -1.416667, -1.333333, -1.250000, -1.166667, -1.083333, -1.000000, -0.916667, -0.833333, -0.750000, -0.666667, -0.583333, -0.500000, -0.416667, -0.333333, -0.250000, -0.166667, -0.083333, 0.000000, 0.083333, 0.166667, 0.250000, 0.333333, 0.416667, 0.500000, 0.583333, 0.666667, 0.750000, 0.833333, 0.916667, 1.000000, 1.083333, 1.166667, 1.250000, 1.333333, 1.416667, 1.500000, 1.583333, 1.666667, 1.750000, 1.833333, 1.916667, 2.000000, 2.083333, 2.166667, 2.250000, 2.333333, 2.416667, 2.500000, 2.583333, 2.666667, 2.750000, 2.833333, 2.916667, 3.000000, 3.083333, 3.166667, 3.250000, 3.333333, 3.416667, 3.500000, 3.583333, 3.666667, 3.750000, 3.833333, 3.916667, 4.000000, 4.083333, 4.166667, 4.250000, 4.333333, 4.416667, 4.500000, 4.583333, 4.666667, 4.750000, 4.833333, 4.916667, 5.000000
0.000000, 0.000000, 0.000000, -0.000000, -0.000000, 0.000000, 0.000000, -0.000000, -0.000000, 0.000000, -0.000000, 0.000000, 0.000000, 0.000000, -0.000000, -0.000000, 0.000000, 0.000000, -0.000000, 0.000000, 0.000000, 0.000000, -0.000000, 0.000000, 0.000000, -0.000000, 0.000000, 0.000000, 0.000000, 0.000000, 0.000000, 0.000000, 0.000000, 0.000000, 0.000000, 0.000000, 0.000000, 0.000000, 0.000000, 0.000000, 0.000000, 0.000000, 0.000000, 0.000000, 0.000000, 0.000000, 0.000000, 0.000000, 0.000000, 0.000000, 0.000000, 0.000000, 0.000000, 0.000000, 0.000000, 0.000000, 0.000000, 0.000000, 0.000000, 0.000000, 0.000000, 0.000000, 0.000000, 0.000000, 0.000000, 0.000000, 0.000000, 0.000000, 0.000000, 0.000000, 0.000000, 0.000000, 0.000000, 0.000000, 0.000000, 0.000000, 0.000000, 0.000000, 0.000000, 0.000000, 0.000000, 0.000000, 0.000000, 0.000000, 0.000000, 0.000000, 0.000000, 0.000000, -0.000000, 0.000000, 0.000000, -0.000000, -0.000000, 0.000000, 0.000000, 0.000000, 0.000000, 0.000000, 0.000000, 0.000000, 0.000000, -0.000000, -0.000000, -0.000000, -0.000000, -0.000000, -0.000000, -0.000000, -0.000000, -0.000000, -0.000000, -0.000000, -0.000000, 0.000000, 0.000000, -0.000000, -0.000000, -0.000000, -0.000000, 0.000000, -0.000000
