# Supplementary material for: Non-classical microwave–optical photon pair generation with a chip-scale transducer
Source: Springer Nature journal article supplement (doi:10.1038/s41567-024-02409-z), 2024-02-23
Supplement: MOESM2 [file 41567_2024_2409_MOESM2_ESM.zip › FigS7/figS7b_theory.txt]

-5.000000, -4.897959, -4.795918, -4.693878, -4.591837, -4.489796, -4.387755, -4.285714, -4.183673, -4.081633, -3.979592, -3.877551, -3.775510, -3.673469, -3.571429, -3.469388, -3.367347, -3.265306, -3.163265, -3.061224, -2.959184, -2.857143, -2.755102, -2.653061, -2.551020, -2.448980, -2.346939, -2.244898, -2.142857, -2.040816, -1.938776, -1.836735, -1.734694, -1.632653, -1.530612, -1.428571, -1.326531, -1.224490, -1.122449, -1.020408, -0.918367, -0.816327, -0.714286, -0.612245, -0.510204, -0.408163, -0.306122, -0.204082, -0.102041, -0.000000, 0.102041, 0.204082, 0.306122, 0.408163, 0.510204, 0.612245, 0.714286, 0.816327, 0.918367, 1.020408, 1.122449, 1.224490, 1.326531, 1.428571, 1.530612, 1.632653, 1.734694, 1.836735, 1.938776, 2.040816, 2.142857, 2.244898, 2.346939, 2.448980, 2.551020, 2.653061, 2.755102, 2.857143, 2.959184, 3.061224, 3.163265, 3.265306, 3.367347, 3.469388, 3.571429, 3.673469, 3.775510, 3.877551, 3.979592, 4.081633, 4.183673, 4.285714, 4.387755, 4.489796, 4.591837, 4.693878, 4.795918, 4.897959
0.000000, 0.000000, 0.000000, 0.000000, 0.000000, 0.000000, 0.000000, 0.000000, 0.000000, 0.000000, 0.000000, 0.000000, 0.000000, 0.000000, 0.000000, 0.000000, 0.000000, 0.000000, 0.000000, 0.000000, 0.000000, 0.000000, 0.000000, 0.000000, 0.000000, 0.000000, 0.000000, 0.000000, 0.000000, 0.000000, 0.000000, 0.000000, 0.000000, 0.000000, 0.000000, 0.000000, 0.000000, 0.000000, 0.000000, 0.000000, 0.000000, 0.000000, 0.000000, 0.000000, 0.000000, 0.000000, 0.000000, 0.000000, 0.000000, 0.000000, 0.000000, 0.000000, 0.000000, 0.000000, 0.000000, 0.000000, 0.000000, 0.000000, 0.000000, 0.000000, 0.000000, 0.000000, 0.000000, 0.000000, 0.000000, 0.000000, 0.000000, 0.000000, 0.000000, 0.000000, 0.000000, 0.000000, 0.000000, 0.000000, 0.000000, 0.000000, 0.000000, 0.000000, 0.000000, 0.000000, 0.000000, 0.000000, 0.000000, 0.000000, 0.000000, 0.000000, 0.000000, 0.000000, 0.000000, 0.000000, 0.000000, 0.000000, 0.000000, 0.000000, 0.000000, 0.000000, 0.000000, 0.000000
