# Supplementary material for: Non-classical microwave–optical photon pair generation with a chip-scale transducer
Source: Springer Nature journal article supplement (doi:10.1038/s41567-024-02409-z), 2024-02-23
Supplement: MOESM2 [file 41567_2024_2409_MOESM2_ESM.zip › FigS8/figS8a_data.txt]

0.071131	0.067877	0.072102	0.078419	0.078710	0.083948	0.065064	0.071042	0.074166	0.070190	0.072178	0.088798	0.058957	0.083452	0.080807	0.070441	0.066258
0.077964	0.063221	0.068218	0.077283	0.085992	0.075266	0.062872	0.071488	0.071683	0.066580	0.080928	0.082999	0.062623	0.081272	0.078208	0.074273	0.078903
0.087648	0.064584	0.068332	0.076815	0.096181	0.063816	0.057312	0.075111	0.071170	0.063461	0.083684	0.075989	0.072090	0.070135	0.078652	0.076607	0.089115
0.095933	0.074346	0.073374	0.075797	0.102986	0.060433	0.055545	0.075171	0.070124	0.062523	0.076379	0.072401	0.082180	0.063267	0.082456	0.078042	0.096382
0.097151	0.086094	0.081497	0.075145	0.101651	0.065088	0.062397	0.069901	0.068287	0.064956	0.069356	0.072736	0.086192	0.065852	0.086750	0.079486	0.097197
0.091460	0.093220	0.087855	0.075852	0.092604	0.074018	0.074131	0.065230	0.069381	0.066644	0.075881	0.072032	0.082623	0.071685	0.085599	0.081597	0.091092
0.080541	0.091443	0.086821	0.078114	0.083005	0.083976	0.086059	0.067977	0.075499	0.067295	0.094307	0.067915	0.075288	0.074687	0.076504	0.085159	0.083433
0.071029	0.081995	0.080816	0.081993	0.080962	0.090669	0.096165	0.077923	0.081640	0.071315	0.109656	0.065518	0.070018	0.074398	0.069093	0.089411	0.075912
0.073963	0.073952	0.076898	0.087471	0.087491	0.092639	0.101813	0.084625	0.080620	0.077286	0.113057	0.067152	0.069297	0.072111	0.072697	0.092580	0.067817
0.088984	0.072640	0.078828	0.092844	0.101547	0.095302	0.102964	0.081374	0.074403	0.082039	0.107504	0.068203	0.070875	0.070147	0.083869	0.094264	0.065289
0.102973	0.074051	0.085771	0.097097	0.123875	0.103713	0.105549	0.078424	0.072438	0.088425	0.098842	0.069168	0.074073	0.072757	0.097197	0.096403	0.074669
0.108276	0.079000	0.093571	0.104878	0.150999	0.117569	0.114146	0.088031	0.080034	0.099130	0.095081	0.076485	0.081873	0.080720	0.108566	0.102645	0.091474
0.108588	0.092572	0.099745	0.121102	0.180175	0.136835	0.126666	0.107173	0.096495	0.111171	0.103799	0.092033	0.096696	0.090150	0.111867	0.113420	0.106631
0.108957	0.106062	0.106914	0.144179	0.218234	0.163447	0.143863	0.126343	0.119296	0.121580	0.120052	0.112369	0.118067	0.099405	0.111076	0.125039	0.118774
0.111849	0.108230	0.120038	0.171672	0.275905	0.201377	0.175707	0.146881	0.147714	0.134185	0.133429	0.135242	0.142978	0.112234	0.118319	0.138855	0.133529
0.119468	0.110309	0.141830	0.207076	0.361357	0.265172	0.233067	0.184056	0.186806	0.158462	0.151490	0.163027	0.169792	0.136124	0.137968	0.161533	0.154307
0.133244	0.131608	0.170752	0.257152	0.476323	0.376567	0.322269	0.251536	0.241571	0.202125	0.192731	0.199242	0.201102	0.176933	0.169698	0.193908	0.180979
0.153873	0.171209	0.203327	0.318779	0.604710	0.532856	0.438568	0.341578	0.306819	0.261826	0.253480	0.244566	0.237618	0.228282	0.210620	0.229376	0.213503
0.179264	0.211781	0.232432	0.369316	0.710102	0.683079	0.548180	0.421832	0.366789	0.317668	0.305755	0.292251	0.270419	0.269983	0.246128	0.257621	0.245437
0.200514	0.237277	0.244528	0.383460	0.756087	0.757548	0.595193	0.454368	0.397710	0.342872	0.324889	0.319655	0.283680	0.284173	0.258433	0.266203	0.259839
0.208179	0.239570	0.230388	0.358914	0.730068	0.725956	0.551257	0.425563	0.378708	0.325773	0.304544	0.305459	0.267069	0.269575	0.243943	0.249956	0.246095
0.200448	0.220417	0.196353	0.315857	0.647587	0.615922	0.447995	0.357161	0.314825	0.278677	0.258834	0.262143	0.226297	0.236653	0.214055	0.217493	0.212874
0.180793	0.190096	0.159192	0.277394	0.540709	0.480826	0.343635	0.283661	0.238586	0.223824	0.212373	0.217865	0.181513	0.197082	0.183768	0.182059	0.174930
0.157089	0.158875	0.131550	0.254528	0.445664	0.364223	0.269756	0.228529	0.182192	0.177138	0.177771	0.178489	0.153081	0.162698	0.160863	0.153609	0.141230
0.140069	0.132519	0.113433	0.243915	0.390592	0.288748	0.224278	0.199867	0.157185	0.145877	0.155190	0.141551	0.145000	0.143205	0.145015	0.139836	0.119459
0.132042	0.116214	0.100975	0.237129	0.382939	0.260516	0.200096	0.191876	0.156809	0.133656	0.147488	0.118224	0.144880	0.139380	0.135424	0.142736	0.114398
0.127584	0.114163	0.096272	0.232932	0.410905	0.274353	0.201494	0.194982	0.169728	0.140388	0.155853	0.119163	0.144461	0.146068	0.134914	0.155331	0.122606
0.128763	0.126183	0.102544	0.240577	0.462034	0.320234	0.237108	0.211820	0.192517	0.161376	0.175540	0.143042	0.151650	0.160088	0.147576	0.171846	0.140854
0.143599	0.149500	0.122972	0.267398	0.532779	0.394614	0.306199	0.252734	0.229339	0.195219	0.203095	0.182561	0.176257	0.182483	0.174998	0.195073	0.170403
0.170555	0.177747	0.159843	0.304139	0.611382	0.493820	0.392114	0.314737	0.278986	0.245088	0.234351	0.228858	0.214191	0.214401	0.213031	0.224248	0.205257
0.195730	0.199648	0.202144	0.330842	0.665005	0.585479	0.465089	0.374557	0.325347	0.302673	0.261456	0.270540	0.249821	0.247090	0.248143	0.246933	0.230437
0.204352	0.207420	0.229541	0.335768	0.662954	0.617386	0.493253	0.404200	0.347726	0.341817	0.277191	0.293469	0.266834	0.264907	0.261411	0.252519	0.237850
0.195599	0.203372	0.232353	0.319052	0.603284	0.572793	0.462623	0.390683	0.339106	0.338364	0.276850	0.288469	0.258980	0.262640	0.247977	0.241965	0.232321
0.183463	0.194456	0.214623	0.284089	0.506002	0.485501	0.389960	0.340971	0.305574	0.293622	0.259375	0.259690	0.233299	0.244840	0.224441	0.220047	0.219448
0.175701	0.183237	0.187033	0.240530	0.396636	0.396039	0.309218	0.274267	0.257419	0.233306	0.229021	0.221352	0.200516	0.215768	0.203708	0.190705	0.197972
0.163841	0.167771	0.162823	0.204911	0.300794	0.321934	0.244586	0.213132	0.208938	0.181997	0.194668	0.187160	0.168830	0.181746	0.180568	0.160236	0.167972
0.143536	0.149502	0.149242	0.180715	0.235805	0.262963	0.196647	0.172497	0.171486	0.146918	0.165736	0.161626	0.146336	0.150278	0.151938	0.134987	0.136965
0.126161	0.132578	0.142813	0.156184	0.199503	0.214494	0.153723	0.149977	0.144783	0.126178	0.144653	0.141073	0.135014	0.126820	0.127089	0.116929	0.111513
0.121006	0.118830	0.135044	0.130604	0.173380	0.177036	0.115484	0.133239	0.124563	0.115739	0.126773	0.121950	0.125954	0.113870	0.112378	0.104465	0.092485
0.122883	0.111658	0.118954	0.114928	0.145021	0.152605	0.095084	0.117665	0.110280	0.109094	0.110677	0.104270	0.111931	0.105901	0.105417	0.095029	0.083092
0.123199	0.111960	0.095630	0.109535	0.122736	0.136557	0.097345	0.107547	0.102360	0.102276	0.101054	0.090232	0.096476	0.097586	0.103863	0.088067	0.087466
0.120816	0.111907	0.076430	0.106751	0.114652	0.123965	0.109665	0.102968	0.099428	0.095516	0.099764	0.082063	0.085307	0.094723	0.105897	0.084899	0.098749
0.117948	0.107021	0.070869	0.104499	0.109018	0.115953	0.115626	0.097859	0.096923	0.089235	0.101057	0.079397	0.079139	0.100080	0.105578	0.083515	0.103618
0.112896	0.098908	0.075618	0.103871	0.096181	0.111449	0.109360	0.090573	0.089357	0.084125	0.097669	0.079854	0.077872	0.103045	0.098884	0.079191	0.097935
0.102837	0.086244	0.081220	0.102887	0.086398	0.103487	0.096582	0.085977	0.076866	0.080461	0.088866	0.080062	0.082137	0.096269	0.088535	0.071496	0.088311
0.092356	0.072872	0.082426	0.096924	0.086457	0.090539	0.084212	0.085269	0.065366	0.074649	0.079680	0.076767	0.087641	0.087949	0.077347	0.064908	0.083153
0.089614	0.068107	0.078202	0.083669	0.084752	0.081951	0.074391	0.084657	0.060144	0.063704	0.073602	0.070770	0.087604	0.087891	0.067825	0.063837	0.084743
0.092025	0.070239	0.069057	0.068879	0.073714	0.083856	0.069011	0.084607	0.062282	0.052942	0.071319	0.065612	0.082403	0.090852	0.065525	0.067516	0.085977
0.089421	0.068857	0.059068	0.064407	0.064128	0.087886	0.069944	0.085573	0.069234	0.050577	0.073017	0.062353	0.077363	0.085933	0.069738	0.067624	0.079648
0.081332	0.059747	0.053983	0.075879	0.066543	0.083900	0.074082	0.081781	0.076652	0.057427	0.074925	0.060789	0.073376	0.073495	0.070606	0.058315	0.069928
0.075214	0.049320	0.052395	0.093018	0.075012	0.075601	0.076107	0.073672	0.080904	0.067758	0.071274	0.062007	0.068140	0.059956	0.063871	0.048547	0.064469
