# Supplementary material for: Non-classical microwave–optical photon pair generation with a chip-scale transducer
Source: Springer Nature journal article supplement (doi:10.1038/s41567-024-02409-z), 2024-02-23
Supplement: MOESM2 [file 41567_2024_2409_MOESM2_ESM.zip › FigS8/figS8b.txt]

-1.450000	-0.950000	-0.450000	0.050000	0.550000	1.050000	1.550000	2.050000	2.550000	3.050000	3.550000	4.050000	4.550000	5.050000	5.550000	6.050000	6.550000
0.150856	0.196825	0.201742	0.397346	0.847510	0.715887	0.528649	0.416575	0.367088	0.312163	0.273066	0.289420	0.259342	0.249116	0.225169	0.248611	0.207489
0.092268	0.077902	0.076104	0.085035	0.094370	0.094019	0.086649	0.083291	0.077336	0.076268	0.087275	0.074255	0.077496	0.080155	0.083288	0.077522	0.083327
