# Supplementary material for: Non-classical microwave–optical photon pair generation with a chip-scale transducer
Source: Springer Nature journal article supplement (doi:10.1038/s41567-024-02409-z), 2024-02-23
Supplement: MOESM2 [file 41567_2024_2409_MOESM2_ESM.zip › FigS9/data_key_cdagc.txt]

'simulation: far detuned', 
'simulation: on resonance', 
'measurement: far detuned', 
'measurement: on resonance'
