# Supplementary material for: Non-classical microwave–optical photon pair generation with a chip-scale transducer
Source: Springer Nature journal article supplement (doi:10.1038/s41567-024-02409-z), 2024-02-23
Supplement: MOESM2 [file 41567_2024_2409_MOESM2_ESM.zip › FigS9/figS9_bath_b.txt]

-0.894269, -0.617234, -0.340200, -0.063166, 0.075351, 0.144609, 0.213868, 0.490902, 0.767936, 1.044970, 1.322004, 1.599038, 1.876072, 2.153106, 2.430140
0.022000, 0.022000, 0.022000, 0.022000, 0.380600, 0.699560, 0.936788, 0.449503, 0.305723, 0.214685, 0.194299, 0.158935, 0.137142, 0.130299, 0.112948
