# Supplementary material for: Non-classical microwave–optical photon pair generation with a chip-scale transducer
Source: Springer Nature journal article supplement (doi:10.1038/s41567-024-02409-z), 2024-02-23
Supplement: MOESM2 [file 41567_2024_2409_MOESM2_ESM.zip › FigS9/figS9_bath_c.txt]

-0.894269, -0.617234, -0.340200, -0.063166, 0.075351, 0.144609, 0.213868, 0.490902, 0.767936, 1.044970, 1.322004, 1.599038, 1.876072, 2.153106, 2.430140
0.022000, 0.022000, 0.022000, 0.022000, 0.022000, 0.022000, 0.111307, 0.092791, 0.076147, 0.066964, 0.062670, 0.051527, 0.044126, 0.045121, 0.046265
