# Supplementary material for: Non-classical microwave–optical photon pair generation with a chip-scale transducer
Source: Springer Nature journal article supplement (doi:10.1038/s41567-024-02409-z), 2024-02-23
Supplement: MOESM2 [file 41567_2024_2409_MOESM2_ESM.zip › FigS9/figS9_bdagb_sim.txt]

0.021995
0.021996
0.021996
0.021996
0.021997
0.021997
0.021997
0.021997
0.021997
0.021997
0.021996
0.021996
0.021996
0.021996
0.021996
0.021996
0.021996
0.021996
0.021996
0.021996
0.021996
0.021996
0.021996
0.021996
0.021996
0.021996
0.021996
0.021996
0.021997
0.021997
0.021997
0.021997
0.021997
0.021997
0.021998
0.021998
0.021998
0.021998
0.021998
0.021998
0.021998
0.021999
0.021999
0.021999
0.021999
0.021999
0.021999
0.021999
0.021999
0.021999
0.022000
0.022000
0.022000
0.022000
0.022000
0.022000
0.022000
0.022000
0.022000
0.022000
0.022000
0.022000
0.022000
0.022000
0.022000
0.022000
0.022000
0.022000
0.022000
0.022000
0.022000
0.022000
0.022000
0.022000
0.022000
0.022000
0.022000
0.022000
0.022000
0.022000
0.022000
0.022000
0.022000
0.022000
0.022000
0.022000
0.022000
0.022000
0.022009
0.022062
0.022201
0.022480
0.022954
0.023652
0.024600
0.025824
0.027349
0.029193
0.031378
0.033923
0.036843
0.040143
0.043829
0.047902
0.052364
0.057223
0.062464
0.068024
0.073837
0.079830
0.085951
0.092204
0.098529
0.104753
0.110702
0.116203
0.121155
0.125572
0.129470
0.132870
0.135790
0.138250
0.140272
0.141877
0.143086
0.143923
0.144413
0.144575
0.144433
0.144013
0.143337
0.142420
0.141291
0.139966
0.138466
0.136810
0.135026
0.133158
0.131246
0.129332
0.127437
0.125571
0.123741
0.121950
0.120201
0.118497
0.116841
0.115232
0.113671
0.112157
0.110690
0.109268
0.107888
0.106549
0.105249
0.103984
0.102752
0.101550
0.100377
0.099229
0.098106
0.097007
0.095935
0.094892
0.093875
0.092883
0.091913
0.090965
0.090036
0.089124
0.088227
0.087344
0.086475
0.085617
0.084771
0.083936
0.083110
0.082292
0.081483
0.080680
0.079885
0.079097
0.078315
0.077539
0.076773
0.076024
0.075297
0.074599
0.073933
0.073298
0.072693
0.072117
0.071568
0.071046
0.070549
0.070077
0.069626
0.069197
0.068788
0.068399
0.068027
0.067671
0.067330
0.067004
0.066690
0.066388
0.066097
0.065817
0.065544
0.065277
0.065012
0.064748
0.064482
0.064213
0.063943
0.063669
0.063392
0.063111
0.062826
0.062537
0.062244
0.061946
0.061644
0.061338
0.061027
0.060712
0.060393
0.060069
0.059742
0.059412
0.059079
0.058742
0.058403
0.058064
0.057726
0.057390
0.057057
0.056727
0.056401
0.056078
0.055759
0.055443
0.055131
0.054824
0.054520
0.054219
0.053923
0.053631
0.053343
0.053058
0.052777
0.052499
0.052225
0.051954
0.051686
0.051421
0.051160
0.050905
0.050656
0.050415
0.050184
0.049961
0.049746
0.049540
0.049342
0.049152
0.048970
0.048796
0.048630
0.048471
0.048320
0.048176
0.048039
0.047909
0.047785
0.047667
0.047555
0.047449
0.047349
0.047253
0.047161
0.047072
0.046984
0.046897
0.046807
0.046716
0.046624
0.046531
0.046437
0.046342
0.046245
0.046147
0.046048
0.045948
0.045848
0.045745
0.045643
0.045540
0.045436
0.045331
0.045226
0.045121
0.045015
0.044909
0.044803
0.044698
0.044594
0.044492
0.044391
0.044292
0.044194
0.044097
0.044000
0.043905
0.043809
0.043713
0.043618
0.043521
0.043424
0.043327
0.043228
0.043128
0.043026
0.042923
0.042819
0.042713
0.042606
