# Supplementary material for: Non-classical microwave–optical photon pair generation with a chip-scale transducer
Source: Springer Nature journal article supplement (doi:10.1038/s41567-024-02409-z), 2024-02-23
Supplement: MOESM2 [file 41567_2024_2409_MOESM2_ESM.zip › FigS9/figS9_cdagc.txt]

0.032365	0.032365	0.032366	0.032366	0.032366	0.032366	0.032366	0.032366	0.032366	0.032366	0.032366	0.032366	0.032366	0.032366	0.032366	0.032366	0.032366	0.032366	0.032366	0.032366	0.032366	0.032366	0.032366	0.032366	0.032366	0.032366	0.032366	0.032366	0.032366	0.032366	0.032366	0.032366	0.032366	0.032366	0.032366	0.032366	0.032366	0.032366	0.032366	0.032366	0.032366	0.032366	0.032366	0.032366	0.032366	0.032366	0.032366	0.032366	0.032366	0.032366
0.032275	0.032279	0.032282	0.032285	0.032288	0.032290	0.032293	0.032295	0.032297	0.032299	0.032300	0.032302	0.032303	0.032304	0.032305	0.032306	0.032307	0.032307	0.032308	0.032308	0.032309	0.032309	0.032309	0.032309	0.032310	0.032310	0.032310	0.032310	0.032310	0.032310	0.032310	0.032310	0.032310	0.032310	0.032311	0.032311	0.032311	0.032311	0.032312	0.032312	0.032313	0.032313	0.032314	0.032315	0.032316	0.032317	0.032318	0.032320	0.032321	0.032323
0.032622	0.032622	0.032622	0.032622	0.032622	0.032622	0.032622	0.032622	0.032622	0.032622	0.032622	0.032622	0.032622	0.032622	0.032622	0.032623	0.032580	0.032435	0.032222	0.031935	0.031676	0.031449	0.031358	0.031434	0.031680	0.032149	0.032742	0.033509	0.034275	0.035121	0.035859	0.036578	0.037126	0.037578	0.037849	0.037980	0.037950	0.037768	0.037489	0.037096	0.036701	0.036280	0.035921	0.035679	0.035528	0.035491	0.035544	0.035636	0.035744	0.035803
0.034688	0.034698	0.034668	0.034605	0.034499	0.034370	0.034198	0.034015	0.033791	0.033569	0.033311	0.033064	0.032791	0.032541	0.032273	0.032039	0.031802	0.031588	0.031417	0.031263	0.031151	0.031062	0.031010	0.030983	0.030983	0.031005	0.031042	0.031095	0.031153	0.031222	0.031289	0.031364	0.031436	0.031517	0.031596	0.031687	0.031777	0.031882	0.031982	0.032096	0.032200	0.032310	0.032410	0.032491	0.032562	0.032608	0.032635	0.032638	0.032617	0.032576
[truncated: 277 more columns]
