# Supplementary material for: Non-classical microwave–optical photon pair generation with a chip-scale transducer
Source: Springer Nature journal article supplement (doi:10.1038/s41567-024-02409-z), 2024-02-23
Supplement: MOESM2 [file 41567_2024_2409_MOESM2_ESM.zip › FigS9/figS9_time_us.txt]

-1.078958
-1.067415
-1.055872
-1.044329
-1.032786
-1.021242
-1.009699
-0.998156
-0.986613
-0.975070
-0.963527
-0.951984
-0.940441
-0.928898
-0.917355
-0.905812
-0.894269
-0.882725
-0.871182
-0.859639
-0.848096
-0.836553
-0.825010
-0.813467
-0.801924
-0.790381
-0.778838
-0.767295
-0.755752
-0.744208
-0.732665
-0.721122
-0.709579
-0.698036
-0.686493
-0.674950
-0.663407
-0.651864
-0.640321
-0.628778
-0.617234
-0.605691
-0.594148
-0.582605
-0.571062
-0.559519
-0.547976
-0.536433
-0.524890
-0.513347
-0.501804
-0.490261
-0.478717
-0.467174
-0.455631
-0.444088
-0.432545
-0.421002
-0.409459
-0.397916
-0.386373
-0.374830
-0.363287
-0.351743
-0.340200
-0.328657
-0.317114
-0.305571
-0.294028
-0.282485
-0.270942
-0.259399
-0.247856
-0.236313
-0.224770
-0.213226
-0.201683
-0.190140
-0.178597
-0.167054
-0.155511
-0.143968
-0.132425
-0.120882
-0.109339
-0.097796
-0.086253
-0.074709
-0.063166
-0.051623
-0.040080
-0.028537
-0.016994
-0.005451
0.006092
0.017635
0.029178
0.040721
0.052265
0.063808
0.075351
0.086894
0.098437
0.109980
0.121523
0.133066
0.144609
0.156152
0.167695
0.179238
0.190782
0.202325
0.213868
0.225411
0.236954
0.248497
0.260040
0.271583
0.283126
0.294669
0.306212
0.317756
0.329299
0.340842
0.352385
0.363928
0.375471
0.387014
0.398557
0.410100
0.421643
0.433186
0.444729
0.456273
0.467816
0.479359
0.490902
0.502445
0.513988
0.525531
0.537074
0.548617
0.560160
0.571703
0.583246
0.594790
0.606333
0.617876
0.629419
0.640962
0.652505
0.664048
0.675591
0.687134
0.698677
0.710220
0.721764
0.733307
0.744850
0.756393
0.767936
0.779479
0.791022
0.802565
0.814108
0.825651
0.837194
0.848737
0.860281
0.871824
0.883367
0.894910
0.906453
0.917996
0.929539
0.941082
0.952625
0.964168
0.975711
0.987255
0.998798
1.010341
1.021884
1.033427
1.044970
1.056513
1.068056
1.079599
1.091142
1.102685
1.114228
1.125772
1.137315
1.148858
1.160401
1.171944
1.183487
1.195030
1.206573
1.218116
1.229659
1.241202
1.252745
1.264289
1.275832
1.287375
1.298918
1.310461
1.322004
1.333547
1.345090
1.356633
1.368176
1.379719
1.391263
1.402806
1.414349
1.425892
1.437435
1.448978
1.460521
1.472064
1.483607
1.495150
1.506693
1.518236
1.529780
1.541323
1.552866
1.564409
1.575952
1.587495
1.599038
1.610581
1.622124
1.633667
1.645210
1.656754
1.668297
1.679840
1.691383
1.702926
1.714469
1.726012
1.737555
1.749098
1.760641
1.772184
1.783727
1.795271
1.806814
1.818357
1.829900
1.841443
1.852986
1.864529
1.876072
1.887615
1.899158
1.910701
1.922244
1.933788
1.945331
1.956874
1.968417
1.979960
1.991503
2.003046
2.014589
2.026132
2.037675
2.049218
2.060762
2.072305
2.083848
2.095391
2.106934
2.118477
2.130020
2.141563
2.153106
2.164649
2.176192
2.187735
2.199279
2.210822
2.222365
2.233908
2.245451
2.256994
2.268537
2.280080
2.291623
2.303166
2.314709
2.326253
2.337796
2.349339
2.360882
2.372425
2.383968
2.395511
2.407054
2.418597
2.430140
2.441683
2.453226
2.464770
2.476313
2.487856
2.499399
2.510942
2.522485
2.534028
2.545571
2.557114
2.568657
2.580200
2.591743
2.603287
2.614830
2.626373
2.637916
2.649459
2.661002
2.672545
2.684088
