# Supplementary material for: Non-classical microwave–optical photon pair generation with a chip-scale transducer
Source: Springer Nature journal article supplement (doi:10.1038/s41567-024-02409-z), 2024-02-23
Supplement: MOESM2 [file 41567_2024_2409_MOESM2_ESM.zip › FigS10/data_key.txt]

tau (us),
CdagC simulation,
CdagC_click simulation,
CdagC measurement,
CdagC_click measurement
