# Supplementary material for: Non-classical microwave–optical photon pair generation with a chip-scale transducer
Source: Springer Nature journal article supplement (doi:10.1038/s41567-024-02409-z), 2024-02-23
Supplement: MOESM2 [file 41567_2024_2409_MOESM2_ESM.zip › FigS10/figS10.txt]

-1.181242	-1.169699	-1.158156	-1.146613	-1.135070	-1.123527	-1.111984	-1.100441	-1.088898	-1.077355	-1.065812	-1.054269	-1.042725	-1.031182	-1.019639	-1.008096	-0.996553	-0.985010	-0.973467	-0.961924	-0.950381	-0.938838	-0.927295	-0.915752	-0.904208	-0.892665	-0.881122	-0.869579	-0.858036	-0.846493	-0.834950	-0.823407	-0.811864	-0.800321	-0.788778	-0.777234	-0.765691	-0.754148	-0.742605	-0.731062	-0.719519	-0.707976	-0.696433	-0.684890	-0.673347	-0.661804	-0.650261	-0.638717	-0.627174	-0.615631
0.032290	0.032293	0.032295	0.032297	0.032299	0.032300	0.032302	0.032303	0.032304	0.032305	0.032306	0.032307	0.032307	0.032308	0.032308	0.032309	0.032309	0.032309	0.032309	0.032310	0.032310	0.032310	0.032310	0.032310	0.032310	0.032310	0.032310	0.032310	0.032310	0.032311	0.032311	0.032311	0.032311	0.032312	0.032312	0.032313	0.032313	0.032314	0.032315	0.032316	0.032317	0.032318	0.032320	0.032321	0.032323	0.032325	0.032327	0.032329	0.032332	0.032334
0.032290	0.032293	0.032295	0.032297	0.032299	0.032300	0.032302	0.032303	0.032304	0.032305	0.032306	0.032307	0.032307	0.032308	0.032308	0.032309	0.032309	0.032309	0.032309	0.032310	0.032310	0.032310	0.032310	0.032310	0.032310	0.032310	0.032310	0.032310	0.032310	0.032311	0.032311	0.032311	0.032312	0.032312	0.032313	0.032314	0.032315	0.032316	0.032317	0.032319	0.032322	0.032325	0.032329	0.032333	0.032339	0.032346	0.032355	0.032365	0.032378	0.032393
0.034370	0.034198	0.034015	0.033791	0.033569	0.033311	0.033064	0.032791	0.032541	0.032273	0.032039	0.031802	0.031588	0.031417	0.031263	0.031151	0.031062	0.031010	0.030983	0.030983	0.031005	0.031042	0.031095	0.031153	0.031222	0.031289	0.031364	0.031436	0.031517	0.031596	0.031687	0.031777	0.031882	0.031982	0.032096	0.032200	0.032310	0.032410	0.032491	0.032562	0.032608	0.032635	0.032638	0.032617	0.032576	0.032510	0.032431	0.032328	0.032222	0.032094
0.043821	0.043821	0.043821	0.043821	0.043821	0.043821	0.043821	0.043821	0.043821	0.043821	0.043447	0.041929	0.040395	0.039012	0.037568	0.036339	0.035118	0.034133	0.033215	0.032531	0.031948	0.031562	0.031286	0.031158	0.031127	0.031174	0.031287	0.031419	0.031583	0.031742	0.031927	0.032111	0.032341	0.032594	0.032928	0.033298	0.033761	0.034271	0.034769	0.035296	0.035745	0.036147	0.036413	0.036561	0.036555	0.036385	0.036084	0.035626	0.035089	0.034418
[truncated: 277 more columns]
