# Supplementary material for: Non-classical microwave–optical photon pair generation with a chip-scale transducer
Source: Springer Nature journal article supplement (doi:10.1038/s41567-024-02409-z), 2024-02-23
Supplement: MOESM2 [file 41567_2024_2409_MOESM2_ESM.zip › FigS13/data_key.txt]

file: figS6a_data
first row: n_a
second row: g2_{AC} mean
third row: g2_{AC} error bars

----

file: figS6a_model
first row: n_a
second row: model upper bound
third row: model lower bound

----

file: figS6b_triangles
first row: n_a
second row: C_{11} peak

----

file: figS6b_circles
first row: n_a
second row: C_{11} before pump
