# Supplementary material for: Non-classical microwave–optical photon pair generation with a chip-scale transducer
Source: Springer Nature journal article supplement (doi:10.1038/s41567-024-02409-z), 2024-02-23
Supplement: MOESM2 [file 41567_2024_2409_MOESM2_ESM.zip › FigS13/figS13a_data.txt]

0.770000	1.540000	3.080000	6.160000	12.320000	24.640000
4.905640	4.068966	3.298148	2.772491	2.210530	2.039568
0.302834	0.121347	0.074487	0.059271	0.035522	0.041087
