# Supplementary material for: Non-classical microwave–optical photon pair generation with a chip-scale transducer
Source: Springer Nature journal article supplement (doi:10.1038/s41567-024-02409-z), 2024-02-23
Supplement: MOESM2 [file 41567_2024_2409_MOESM2_ESM.zip › FigS13/figS13a_model.txt]

0.770000	1.540000	3.080000	6.160000	12.320000	24.640000
5.866500	4.919800	3.904700	3.226400	2.784400	2.582200
5.210500	4.231000	3.171400	2.477200	1.996900	1.773100
