# Supplementary material for: Non-classical microwave–optical photon pair generation with a chip-scale transducer
Source: Springer Nature journal article supplement (doi:10.1038/s41567-024-02409-z), 2024-02-23
Supplement: MOESM2 [file 41567_2024_2409_MOESM2_ESM.zip › FigS13/figS13b_circles.txt]

0.770000, 1.540000, 3.080000, 6.160000, 12.320000, 24.640000
0.036590, 0.054892, 0.079638, 0.123657, 0.168651, 0.207926
