# Supplementary material for: Non-classical microwave–optical photon pair generation with a chip-scale transducer
Source: Springer Nature journal article supplement (doi:10.1038/s41567-024-02409-z), 2024-02-23
Supplement: MOESM3 [file 41567_2024_2409_MOESM3_ESM.zip]

Archive with 2 entries (2 files):
- Fig2/fig2a_data.mat
- Fig2/fig2b_data_compressed.mat
