# Supplementary material for: Non-classical microwave–optical photon pair generation with a chip-scale transducer
Source: Springer Nature journal article supplement (doi:10.1038/s41567-024-02409-z), 2024-02-23
Supplement: MOESM4 [file 41567_2024_2409_MOESM4_ESM.zip]

Archive with 6 entries (6 files):
- Fig3/data_key.txt
- Fig3/fig3b.txt
- Fig3/fig3c_data.txt
- Fig3/fig3c_fit.txt
- Fig3/fig3d_data.txt
- Fig3/fig3d_fit.txt
