# Supplementary material for: Non-classical microwave–optical photon pair generation with a chip-scale transducer
Source: Springer Nature journal article supplement (doi:10.1038/s41567-024-02409-z), 2024-02-23
Supplement: MOESM4 [file 41567_2024_2409_MOESM4_ESM.zip › Fig3/data_key.txt]

file name: fig3b
first row: tau (us)
second row: mean of MW output noise quanta
third row: mean-SD of MW output noise quanta
fourth row: mean+SD of MW output noise quanta

---

file name: fig3c_data
first row: n_a
second row: C_{11} peak

----

file name: fig3c_fit
first row: n_a
second row: fit to C_{11} peak

----

file name: fig3d_data
first row: T_r (us)
second row: C_{11} before pump
third row: error bars on C_{11} before pump

----

file name: fig3d_fit
first row: T_r
second row: fit to C_{11} before pump
