# Supplementary material for: Non-classical microwave–optical photon pair generation with a chip-scale transducer
Source: Springer Nature journal article supplement (doi:10.1038/s41567-024-02409-z), 2024-02-23
Supplement: MOESM4 [file 41567_2024_2409_MOESM4_ESM.zip › Fig3/fig3b.txt]

-0.900000, -0.899000, -0.898000, -0.897000, -0.896000, -0.895000, -0.894000, -0.893000, -0.892000, -0.891000, -0.890000, -0.889000, -0.888000, -0.887000, -0.886000, -0.885000, -0.884000, -0.883000, -0.882000, -0.881000, -0.880000, -0.879000, -0.878000, -0.877000, -0.876000, -0.875000, -0.874000, -0.873000, -0.872000, -0.871000, -0.870000, -0.869000, -0.868000, -0.867000, -0.866000, -0.865000, -0.864000, -0.863000, -0.862000, -0.861000, -0.860000, -0.859000, -0.858000, -0.857000, -0.856000, -0.855000, -0.854000, -0.853000, -0.852000, -0.851000, -0.850000, -0.849000, -0.848000, -0.847000, -0.846000, -0.845000, -0.844000, -0.843000, -0.842000, -0.841000, -0.840000, -0.839000, -0.838000, -0.837000, -0.836000, -0.835000, -0.834000, -0.833000, -0.832000, -0.831000, -0.830000, -0.829000, -0.828000, -0.827000, -0.826000, -0.825000, -0.824000, -0.823000, -0.822000, -0.821000, -0.820000, -0.819000, -0.818000, -0.817000, -0.816000, -0.815000, -0.814000, -0.813000, -0.812000, -0.811000, -0.810000, -0.809000, -0.808000, -0.807000, -0.806000, -0.805000, -0.804000, -0.803000, -0.802000, -0.801000, -0.800000, -0.799000, -0.798000, -0.797000, -0.796000, -0.795000, -0.794000, -0.793000, -0.792000, -0.791000, -0.790000, -0.789000, -0.788000, -0.787000, -0.786000, -0.785000, -0.784000, -0.783000, -0.782000, -0.781000, -0.780000, -0.779000, -0.778000, -0.777000, -0.776000, -0.775000, -0.774000, -0.773000, -0.772000, -0.771000, -0.770000, -0.769000, -0.768000, -0.767000, -0.766000, -0.765000, -0.764000, -0.763000, -0.762000, -0.761000, -0.760000, -0.759000, -0.758000, -0.757000, -0.756000, -0.755000, -0.754000, -0.753000, -0.752000, -0.751000, -0.750000, -0.749000, -0.748000, -0.747000, -0.746000, -0.745000, -0.744000, -0.743000, -0.742000, -0.741000, -0.740000, -0.739000, -0.738000, -0.737000, -0.736000, -0.735000, -0.734000, -0.733000, -0.732000, -0.731000, -0.730000, -0.729000, -0.728000, -0.727000, -0.726000, -0.725000, -0.724000, -0.723000, -0.722000, -0.721000, -0.720000, -0.719000, -0.718000, -0.717000, -0.716000, -0.715000, -0.714000, -0.713000, -0.712000, -0.711000, -0.710000, -0.709000, -0.708000, -0.707000, -0.706000, -0.705000, -0.704000, -0.703000, -0.702000, -0.701000, -0.700000, -0.699000, -0.698000, -0.697000, -0.696000, -0.695000, -0.694000, -0.693000, -0.692000, -0.691000, -0.690000, -0.689000, -0.688000, -0.687000, -0.686000, -0.685000, -0.684000, -0.683000, -0.682000, -0.681000, -0.680000, -0.679000, -0.678000, -0.677000, -0.676000, -0.675000, -0.674000, -0.673000, -0.672000, -0.671000, -0.670000, -0.669000, -0.668000, -0.667000, -0.666000, -0.665000, -0.664000, -0.663000, -0.662000, -0.661000, -0.660000, -0.659000, -0.658000, -0.657000, -0.656000, -0.655000, -0.654000, -0.653000, -0.652000, -0.651000, -0.650000, -0.649000, -0.648000, -0.647000, -0.646000, -0.645000, -0.644000, -0.643000, -0.642000, -0.641000, -0.640000, -0.639000, -0.638000, -0.637000, -0.636000, -0.635000, -0.634000, -0.633000, -0.632000, -0.631000, -0.630000, -0.629000, -0.628000, -0.627000, -0.626000, -0.625000, -0.624000, -0.623000, -0.622000, -0.621000, -0.620000, -0.619000, -0.618000, -0.617000, -0.616000, -0.615000, -0.614000, -0.613000, -0.612000, -0.611000, -0.610000, -0.609000, -0.608000, -0.607000, -0.606000, -0.605000, -0.604000, -0.603000, -0.602000, -0.601000, -0.600000, -0.599000, -0.598000, -0.597000, -0.596000, -0.595000, -0.594000, -0.593000, -0.592000, -0.591000, -0.590000, -0.589000, -0.588000, -0.587000, -0.586000, -0.585000, -0.584000, -0.583000, -0.582000, -0.581000, -0.580000, -0.579000, -0.578000, -0.577000, -0.576000, -0.575000, -0.574000, -0.573000, -0.572000, -0.571000, -0.570000, -0.569000, -0.568000, -0.567000, -0.566000, -0.565000, -0.564000, -0.563000, -0.562000, -0.561000, -0.560000, -0.559000, -0.558000, -0.557000, -0.556000, -0.555000, -0.554000, -0.553000, -0.552000, -0.551000, -0.550000, -0.549000, -0.548000, -0.547000, -0.546000, -0.545000, -0.544000, -0.543000, -0.542000, -0.541000, -0.540000, -0.539000, -0.538000, -0.537000, -0.536000, -0.535000, -0.534000, -0.533000, -0.532000, -0.531000, -0.530000, -0.529000, -0.528000, -0.527000, -0.526000, -0.525000, -0.524000, -0.523000, -0.522000, -0.521000, -0.520000, -0.519000, -0.518000, -0.517000, -0.516000, -0.515000, -0.514000, -0.513000, -0.512000, -0.511000, -0.510000, -0.509000, -0.508000, -0.507000, -0.506000, -0.505000, -0.504000, -0.503000, -0.502000, -0.501000, -0.500000, -0.499000, -0.498000, -0.497000, -0.496000, -0.495000, -0.494000, -0.493000, -0.492000, -0.491000, -0.490000, -0.489000, -0.488000, -0.487000, -0.486000, -0.485000, -0.484000, -0.483000, -0.482000, -0.481000, -0.480000, -0.479000, -0.478000, -0.477000, -0.476000, -0.475000, -0.474000, -0.473000, -0.472000, -0.471000, -0.470000, -0.469000, -0.468000, -0.467000, -0.466000, -0.465000, -0.464000, -0.463000, -0.462000, -0.461000, -0.460000, -0.459000, -0.458000, -0.457000, -0.456000, -0.455000, -0.454000, -0.453000, -0.452000, -0.451000, -0.450000, -0.449000, -0.448000, -0.447000, -0.446000, -0.445000, -0.444000, -0.443000, -0.442000, -0.441000, -0.440000, -0.439000, -0.438000, -0.437000, -0.436000, -0.435000, -0.434000, -0.433000, -0.432000, -0.431000, -0.430000, -0.429000, -0.428000, -0.427000, -0.426000, -0.425000, -0.424000, -0.423000, -0.422000, -0.421000, -0.420000, -0.419000, -0.418000, -0.417000, -0.416000, -0.415000, -0.414000, -0.413000, -0.412000, -0.411000, -0.410000, -0.409000, -0.408000, -0.407000, -0.406000, -0.405000, -0.404000, -0.403000, -0.402000, -0.401000, -0.400000, -0.399000, -0.398000, -0.397000, -0.396000, -0.395000, -0.394000, -0.393000, -0.392000, -0.391000, -0.390000, -0.389000, -0.388000, -0.387000, -0.386000, -0.385000, -0.384000, -0.383000, -0.382000, -0.381000, -0.380000, -0.379000, -0.378000, -0.377000, -0.376000, -0.375000, -0.374000, -0.373000, -0.372000, -0.371000, -0.370000, -0.369000, -0.368000, -0.367000, -0.366000, -0.365000, -0.364000, -0.363000, -0.362000, -0.361000, -0.360000, -0.359000, -0.358000, -0.357000, -0.356000, -0.355000, -0.354000, -0.353000, -0.352000, -0.351000, -0.350000, -0.349000, -0.348000, -0.347000, -0.346000, -0.345000, -0.344000, -0.343000, -0.342000, -0.341000, -0.340000, -0.339000, -0.338000, -0.337000, -0.336000, -0.335000, -0.334000, -0.333000, -0.332000, -0.331000, -0.330000, -0.329000, -0.328000, -0.327000, -0.326000, -0.325000, -0.324000, -0.323000, -0.322000, -0.321000, -0.320000, -0.319000, -0.318000, -0.317000, -0.316000, -0.315000, -0.314000, -0.313000, -0.312000, -0.311000, -0.310000, -0.309000, -0.308000, -0.307000, -0.306000, -0.305000, -0.304000, -0.303000, -0.302000, -0.301000, -0.300000, -0.299000, -0.298000, -0.297000, -0.296000, -0.295000, -0.294000, -0.293000, -0.292000, -0.291000, -0.290000, -0.289000, -0.288000, -0.287000, -0.286000, -0.285000, -0.284000, -0.283000, -0.282000, -0.281000, -0.280000, -0.279000, -0.278000, -0.277000, -0.276000, -0.275000, -0.274000, -0.273000, -0.272000, -0.271000, -0.270000, -0.269000, -0.268000, -0.267000, -0.266000, -0.265000, -0.264000, -0.263000, -0.262000, -0.261000, -0.260000, -0.259000, -0.258000, -0.257000, -0.256000, -0.255000, -0.254000, -0.253000, -0.252000, -0.251000, -0.250000, -0.249000, -0.248000, -0.247000, -0.246000, -0.245000, -0.244000, -0.243000, -0.242000, -0.241000, -0.240000, -0.239000, -0.238000, -0.237000, -0.236000, -0.235000, -0.234000, -0.233000, -0.232000, -0.231000, -0.230000, -0.229000, -0.228000, -0.227000, -0.226000, -0.225000, -0.224000, -0.223000, -0.222000, -0.221000, -0.220000, -0.219000, -0.218000, -0.217000, -0.216000, -0.215000, -0.214000, -0.213000, -0.212000, -0.211000, -0.210000, -0.209000, -0.208000, -0.207000, -0.206000, -0.205000, -0.204000, -0.203000, -0.202000, -0.201000, -0.200000, -0.199000, -0.198000, -0.197000, -0.196000, -0.195000, -0.194000, -0.193000, -0.192000, -0.191000, -0.190000, -0.189000, -0.188000, -0.187000, -0.186000, -0.185000, -0.184000, -0.183000, -0.182000, -0.181000, -0.180000, -0.179000, -0.178000, -0.177000, -0.176000, -0.175000, -0.174000, -0.173000, -0.172000, -0.171000, -0.170000, -0.169000, -0.168000, -0.167000, -0.166000, -0.165000, -0.164000, -0.163000, -0.162000, -0.161000, -0.160000, -0.159000, -0.158000, -0.157000, -0.156000, -0.155000, -0.154000, -0.153000, -0.152000, -0.151000, -0.150000, -0.149000, -0.148000, -0.147000, -0.146000, -0.145000, -0.144000, -0.143000, -0.142000, -0.141000, -0.140000, -0.139000, -0.138000, -0.137000, -0.136000, -0.135000, -0.134000, -0.133000, -0.132000, -0.131000, -0.130000, -0.129000, -0.128000, -0.127000, -0.126000, -0.125000, -0.124000, -0.123000, -0.122000, -0.121000, -0.120000, -0.119000, -0.118000, -0.117000, -0.116000, -0.115000, -0.114000, -0.113000, -0.112000, -0.111000, -0.110000, -0.109000, -0.108000, -0.107000, -0.106000, -0.105000, -0.104000, -0.103000, -0.102000, -0.101000, -0.100000, -0.099000, -0.098000, -0.097000, -0.096000, -0.095000, -0.094000, -0.093000, -0.092000, -0.091000, -0.090000, -0.089000, -0.088000, -0.087000, -0.086000, -0.085000, -0.084000, -0.083000, -0.082000, -0.081000, -0.080000, -0.079000, -0.078000, -0.077000, -0.076000, -0.075000, -0.074000, -0.073000, -0.072000, -0.071000, -0.070000, -0.069000, -0.068000, -0.067000, -0.066000, -0.065000, -0.064000, -0.063000, -0.062000, -0.061000, -0.060000, -0.059000, -0.058000, -0.057000, -0.056000, -0.055000, -0.054000, -0.053000, -0.052000, -0.051000, -0.050000, -0.049000, -0.048000, -0.047000, -0.046000, -0.045000, -0.044000, -0.043000, -0.042000, -0.041000, -0.040000, -0.039000, -0.038000, -0.037000, -0.036000, -0.035000, -0.034000, -0.033000, -0.032000, -0.031000, -0.030000, -0.029000, -0.028000, -0.027000, -0.026000, -0.025000, -0.024000, -0.023000, -0.022000, -0.021000, -0.020000, -0.019000, -0.018000, -0.017000, -0.016000, -0.015000, -0.014000, -0.013000, -0.012000, -0.011000, -0.010000, -0.009000, -0.008000, -0.007000, -0.006000, -0.005000, -0.004000, -0.003000, -0.002000, -0.001000, 0.000000, 0.001000, 0.002000, 0.003000, 0.004000, 0.005000, 0.006000, 0.007000, 0.008000, 0.009000, 0.010000, 0.011000, 0.012000, 0.013000, 0.014000, 0.015000, 0.016000, 0.017000, 0.018000, 0.019000, 0.020000, 0.021000, 0.022000, 0.023000, 0.024000, 0.025000, 0.026000, 0.027000, 0.028000, 0.029000, 0.030000, 0.031000, 0.032000, 0.033000, 0.034000, 0.035000, 0.036000, 0.037000, 0.038000, 0.039000, 0.040000, 0.041000, 0.042000, 0.043000, 0.044000, 0.045000, 0.046000, 0.047000, 0.048000, 0.049000, 0.050000, 0.051000, 0.052000, 0.053000, 0.054000, 0.055000, 0.056000, 0.057000, 0.058000, 0.059000, 0.060000, 0.061000, 0.062000, 0.063000, 0.064000, 0.065000, 0.066000, 0.067000, 0.068000, 0.069000, 0.070000, 0.071000, 0.072000, 0.073000, 0.074000, 0.075000, 0.076000, 0.077000, 0.078000, 0.079000, 0.080000, 0.081000, 0.082000, 0.083000, 0.084000, 0.085000, 0.086000, 0.087000, 0.088000, 0.089000, 0.090000, 0.091000, 0.092000, 0.093000, 0.094000, 0.095000, 0.096000, 0.097000, 0.098000, 0.099000, 0.100000, 0.101000, 0.102000, 0.103000, 0.104000, 0.105000, 0.106000, 0.107000, 0.108000, 0.109000, 0.110000, 0.111000, 0.112000, 0.113000, 0.114000, 0.115000, 0.116000, 0.117000, 0.118000, 0.119000, 0.120000, 0.121000, 0.122000, 0.123000, 0.124000, 0.125000, 0.126000, 0.127000, 0.128000, 0.129000, 0.130000, 0.131000, 0.132000, 0.133000, 0.134000, 0.135000, 0.136000, 0.137000, 0.138000, 0.139000, 0.140000, 0.141000, 0.142000, 0.143000, 0.144000, 0.145000, 0.146000, 0.147000, 0.148000, 0.149000, 0.150000, 0.151000, 0.152000, 0.153000, 0.154000, 0.155000, 0.156000, 0.157000, 0.158000, 0.159000, 0.160000, 0.161000, 0.162000, 0.163000, 0.164000, 0.165000, 0.166000, 0.167000, 0.168000, 0.169000, 0.170000, 0.171000, 0.172000, 0.173000, 0.174000, 0.175000, 0.176000, 0.177000, 0.178000, 0.179000, 0.180000, 0.181000, 0.182000, 0.183000, 0.184000, 0.185000, 0.186000, 0.187000, 0.188000, 0.189000, 0.190000, 0.191000, 0.192000, 0.193000, 0.194000, 0.195000, 0.196000, 0.197000, 0.198000, 0.199000, 0.200000, 0.201000, 0.202000, 0.203000, 0.204000, 0.205000, 0.206000, 0.207000, 0.208000, 0.209000, 0.210000, 0.211000, 0.212000, 0.213000, 0.214000, 0.215000, 0.216000, 0.217000, 0.218000, 0.219000, 0.220000, 0.221000, 0.222000, 0.223000, 0.224000, 0.225000, 0.226000, 0.227000, 0.228000, 0.229000, 0.230000, 0.231000, 0.232000, 0.233000, 0.234000, 0.235000, 0.236000, 0.237000, 0.238000, 0.239000, 0.240000, 0.241000, 0.242000, 0.243000, 0.244000, 0.245000, 0.246000, 0.247000, 0.248000, 0.249000, 0.250000, 0.251000, 0.252000, 0.253000, 0.254000, 0.255000, 0.256000, 0.257000, 0.258000, 0.259000, 0.260000, 0.261000, 0.262000, 0.263000, 0.264000, 0.265000, 0.266000, 0.267000, 0.268000, 0.269000, 0.270000, 0.271000, 0.272000, 0.273000, 0.274000, 0.275000, 0.276000, 0.277000, 0.278000, 0.279000, 0.280000, 0.281000, 0.282000, 0.283000, 0.284000, 0.285000, 0.286000, 0.287000, 0.288000, 0.289000, 0.290000, 0.291000, 0.292000, 0.293000, 0.294000, 0.295000, 0.296000, 0.297000, 0.298000, 0.299000, 0.300000, 0.301000, 0.302000, 0.303000, 0.304000, 0.305000, 0.306000, 0.307000, 0.308000, 0.309000, 0.310000, 0.311000, 0.312000, 0.313000, 0.314000, 0.315000, 0.316000, 0.317000, 0.318000, 0.319000, 0.320000, 0.321000, 0.322000, 0.323000, 0.324000, 0.325000, 0.326000, 0.327000, 0.328000, 0.329000, 0.330000, 0.331000, 0.332000, 0.333000, 0.334000, 0.335000, 0.336000, 0.337000, 0.338000, 0.339000, 0.340000, 0.341000, 0.342000, 0.343000, 0.344000, 0.345000, 0.346000, 0.347000, 0.348000, 0.349000, 0.350000, 0.351000, 0.352000, 0.353000, 0.354000, 0.355000, 0.356000, 0.357000, 0.358000, 0.359000, 0.360000, 0.361000, 0.362000, 0.363000, 0.364000, 0.365000, 0.366000, 0.367000, 0.368000, 0.369000, 0.370000, 0.371000, 0.372000, 0.373000, 0.374000, 0.375000, 0.376000, 0.377000, 0.378000, 0.379000, 0.380000, 0.381000, 0.382000, 0.383000, 0.384000, 0.385000, 0.386000, 0.387000, 0.388000, 0.389000, 0.390000, 0.391000, 0.392000, 0.393000, 0.394000, 0.395000, 0.396000, 0.397000, 0.398000, 0.399000, 0.400000, 0.401000, 0.402000, 0.403000, 0.404000, 0.405000, 0.406000, 0.407000, 0.408000, 0.409000, 0.410000, 0.411000, 0.412000, 0.413000, 0.414000, 0.415000, 0.416000, 0.417000, 0.418000, 0.419000, 0.420000, 0.421000, 0.422000, 0.423000, 0.424000, 0.425000, 0.426000, 0.427000, 0.428000, 0.429000, 0.430000, 0.431000, 0.432000, 0.433000, 0.434000, 0.435000, 0.436000, 0.437000, 0.438000, 0.439000, 0.440000, 0.441000, 0.442000, 0.443000, 0.444000, 0.445000, 0.446000, 0.447000, 0.448000, 0.449000, 0.450000, 0.451000, 0.452000, 0.453000, 0.454000, 0.455000, 0.456000, 0.457000, 0.458000, 0.459000, 0.460000, 0.461000, 0.462000, 0.463000, 0.464000, 0.465000, 0.466000, 0.467000, 0.468000, 0.469000, 0.470000, 0.471000, 0.472000, 0.473000, 0.474000, 0.475000, 0.476000, 0.477000, 0.478000, 0.479000, 0.480000, 0.481000, 0.482000, 0.483000, 0.484000, 0.485000, 0.486000, 0.487000, 0.488000, 0.489000, 0.490000, 0.491000, 0.492000, 0.493000, 0.494000, 0.495000, 0.496000, 0.497000, 0.498000, 0.499000, 0.500000, 0.501000, 0.502000, 0.503000, 0.504000, 0.505000, 0.506000, 0.507000, 0.508000, 0.509000, 0.510000, 0.511000, 0.512000, 0.513000, 0.514000, 0.515000, 0.516000, 0.517000, 0.518000, 0.519000, 0.520000, 0.521000, 0.522000, 0.523000, 0.524000, 0.525000, 0.526000, 0.527000, 0.528000, 0.529000, 0.530000, 0.531000, 0.532000, 0.533000, 0.534000, 0.535000, 0.536000, 0.537000, 0.538000, 0.539000, 0.540000, 0.541000, 0.542000, 0.543000, 0.544000, 0.545000, 0.546000, 0.547000, 0.548000, 0.549000, 0.550000, 0.551000, 0.552000, 0.553000, 0.554000, 0.555000, 0.556000, 0.557000, 0.558000, 0.559000, 0.560000, 0.561000, 0.562000, 0.563000, 0.564000, 0.565000, 0.566000, 0.567000, 0.568000, 0.569000, 0.570000, 0.571000, 0.572000, 0.573000, 0.574000, 0.575000, 0.576000, 0.577000, 0.578000, 0.579000, 0.580000, 0.581000, 0.582000, 0.583000, 0.584000, 0.585000, 0.586000, 0.587000, 0.588000, 0.589000, 0.590000, 0.591000, 0.592000, 0.593000, 0.594000, 0.595000, 0.596000, 0.597000, 0.598000, 0.599000, 0.600000, 0.601000, 0.602000, 0.603000, 0.604000, 0.605000, 0.606000, 0.607000, 0.608000, 0.609000, 0.610000, 0.611000, 0.612000, 0.613000, 0.614000, 0.615000, 0.616000, 0.617000, 0.618000, 0.619000, 0.620000, 0.621000, 0.622000, 0.623000, 0.624000, 0.625000, 0.626000, 0.627000, 0.628000, 0.629000, 0.630000, 0.631000, 0.632000, 0.633000, 0.634000, 0.635000, 0.636000, 0.637000, 0.638000, 0.639000, 0.640000, 0.641000, 0.642000, 0.643000, 0.644000, 0.645000, 0.646000, 0.647000, 0.648000, 0.649000, 0.650000, 0.651000, 0.652000, 0.653000, 0.654000, 0.655000, 0.656000, 0.657000, 0.658000, 0.659000, 0.660000, 0.661000, 0.662000, 0.663000, 0.664000, 0.665000, 0.666000, 0.667000, 0.668000, 0.669000, 0.670000, 0.671000, 0.672000, 0.673000, 0.674000, 0.675000, 0.676000, 0.677000, 0.678000, 0.679000, 0.680000, 0.681000, 0.682000, 0.683000, 0.684000, 0.685000, 0.686000, 0.687000, 0.688000, 0.689000, 0.690000, 0.691000, 0.692000, 0.693000, 0.694000, 0.695000, 0.696000, 0.697000, 0.698000, 0.699000, 0.700000, 0.701000, 0.702000, 0.703000, 0.704000, 0.705000, 0.706000, 0.707000, 0.708000, 0.709000, 0.710000, 0.711000, 0.712000, 0.713000, 0.714000, 0.715000, 0.716000, 0.717000, 0.718000, 0.719000, 0.720000, 0.721000, 0.722000, 0.723000, 0.724000, 0.725000, 0.726000, 0.727000, 0.728000, 0.729000, 0.730000, 0.731000, 0.732000, 0.733000, 0.734000, 0.735000, 0.736000, 0.737000, 0.738000, 0.739000, 0.740000, 0.741000, 0.742000, 0.743000, 0.744000, 0.745000, 0.746000, 0.747000, 0.748000, 0.749000, 0.750000, 0.751000, 0.752000, 0.753000, 0.754000, 0.755000, 0.756000, 0.757000, 0.758000, 0.759000, 0.760000, 0.761000, 0.762000, 0.763000, 0.764000, 0.765000, 0.766000, 0.767000, 0.768000, 0.769000, 0.770000, 0.771000, 0.772000, 0.773000, 0.774000, 0.775000, 0.776000, 0.777000, 0.778000, 0.779000, 0.780000, 0.781000, 0.782000, 0.783000, 0.784000, 0.785000, 0.786000, 0.787000, 0.788000, 0.789000, 0.790000, 0.791000, 0.792000, 0.793000, 0.794000, 0.795000, 0.796000, 0.797000, 0.798000, 0.799000, 0.800000, 0.801000, 0.802000, 0.803000, 0.804000, 0.805000, 0.806000, 0.807000, 0.808000, 0.809000, 0.810000, 0.811000, 0.812000, 0.813000, 0.814000, 0.815000, 0.816000, 0.817000, 0.818000, 0.819000, 0.820000, 0.821000, 0.822000, 0.823000, 0.824000, 0.825000, 0.826000, 0.827000, 0.828000, 0.829000, 0.830000, 0.831000, 0.832000, 0.833000, 0.834000, 0.835000, 0.836000, 0.837000, 0.838000, 0.839000, 0.840000, 0.841000, 0.842000, 0.843000, 0.844000, 0.845000, 0.846000, 0.847000, 0.848000, 0.849000, 0.850000, 0.851000, 0.852000, 0.853000, 0.854000, 0.855000, 0.856000, 0.857000, 0.858000, 0.859000, 0.860000, 0.861000, 0.862000, 0.863000, 0.864000, 0.865000, 0.866000, 0.867000, 0.868000, 0.869000, 0.870000, 0.871000, 0.872000, 0.873000, 0.874000, 0.875000, 0.876000, 0.877000, 0.878000, 0.879000, 0.880000, 0.881000, 0.882000, 0.883000, 0.884000, 0.885000, 0.886000, 0.887000, 0.888000, 0.889000, 0.890000, 0.891000, 0.892000, 0.893000, 0.894000, 0.895000, 0.896000, 0.897000, 0.898000, 0.899000, 0.900000, 0.901000, 0.902000, 0.903000, 0.904000, 0.905000, 0.906000, 0.907000, 0.908000, 0.909000, 0.910000, 0.911000, 0.912000, 0.913000, 0.914000, 0.915000, 0.916000, 0.917000, 0.918000, 0.919000, 0.920000, 0.921000, 0.922000, 0.923000, 0.924000, 0.925000, 0.926000, 0.927000, 0.928000, 0.929000, 0.930000, 0.931000, 0.932000, 0.933000, 0.934000, 0.935000, 0.936000, 0.937000, 0.938000, 0.939000, 0.940000, 0.941000, 0.942000, 0.943000, 0.944000, 0.945000, 0.946000, 0.947000, 0.948000, 0.949000, 0.950000, 0.951000, 0.952000, 0.953000, 0.954000, 0.955000, 0.956000, 0.957000, 0.958000, 0.959000, 0.960000, 0.961000, 0.962000, 0.963000, 0.964000, 0.965000, 0.966000, 0.967000, 0.968000, 0.969000, 0.970000, 0.971000, 0.972000, 0.973000, 0.974000, 0.975000, 0.976000, 0.977000, 0.978000, 0.979000, 0.980000, 0.981000, 0.982000, 0.983000, 0.984000, 0.985000, 0.986000, 0.987000, 0.988000, 0.989000, 0.990000, 0.991000, 0.992000, 0.993000, 0.994000, 0.995000, 0.996000, 0.997000, 0.998000, 0.999000, 1.000000, 1.001000, 1.002000, 1.003000, 1.004000, 1.005000, 1.006000, 1.007000, 1.008000, 1.009000, 1.010000, 1.011000, 1.012000, 1.013000, 1.014000, 1.015000, 1.016000, 1.017000, 1.018000, 1.019000, 1.020000, 1.021000, 1.022000, 1.023000, 1.024000, 1.025000, 1.026000, 1.027000, 1.028000, 1.029000, 1.030000, 1.031000, 1.032000, 1.033000, 1.034000, 1.035000, 1.036000, 1.037000, 1.038000, 1.039000, 1.040000, 1.041000, 1.042000, 1.043000, 1.044000, 1.045000, 1.046000, 1.047000, 1.048000, 1.049000, 1.050000, 1.051000, 1.052000, 1.053000, 1.054000, 1.055000, 1.056000, 1.057000, 1.058000, 1.059000, 1.060000, 1.061000, 1.062000, 1.063000, 1.064000, 1.065000, 1.066000, 1.067000, 1.068000, 1.069000, 1.070000, 1.071000, 1.072000, 1.073000, 1.074000, 1.075000, 1.076000, 1.077000, 1.078000, 1.079000, 1.080000, 1.081000, 1.082000, 1.083000, 1.084000, 1.085000, 1.086000, 1.087000, 1.088000, 1.089000, 1.090000, 1.091000, 1.092000, 1.093000, 1.094000, 1.095000, 1.096000, 1.097000, 1.098000, 1.099000, 1.100000, 1.101000, 1.102000, 1.103000, 1.104000, 1.105000, 1.106000, 1.107000, 1.108000, 1.109000, 1.110000, 1.111000, 1.112000, 1.113000, 1.114000, 1.115000, 1.116000, 1.117000, 1.118000, 1.119000, 1.120000, 1.121000, 1.122000, 1.123000, 1.124000, 1.125000, 1.126000, 1.127000, 1.128000, 1.129000, 1.130000, 1.131000, 1.132000, 1.133000, 1.134000, 1.135000, 1.136000, 1.137000, 1.138000, 1.139000, 1.140000, 1.141000, 1.142000, 1.143000, 1.144000, 1.145000, 1.146000, 1.147000, 1.148000, 1.149000, 1.150000, 1.151000, 1.152000, 1.153000, 1.154000, 1.155000, 1.156000, 1.157000, 1.158000, 1.159000, 1.160000, 1.161000, 1.162000, 1.163000, 1.164000, 1.165000, 1.166000, 1.167000, 1.168000, 1.169000, 1.170000, 1.171000, 1.172000, 1.173000, 1.174000, 1.175000, 1.176000, 1.177000, 1.178000, 1.179000, 1.180000, 1.181000, 1.182000, 1.183000, 1.184000, 1.185000, 1.186000, 1.187000, 1.188000, 1.189000, 1.190000, 1.191000, 1.192000, 1.193000, 1.194000, 1.195000, 1.196000, 1.197000, 1.198000, 1.199000, 1.200000, 1.201000, 1.202000, 1.203000, 1.204000, 1.205000, 1.206000, 1.207000, 1.208000, 1.209000, 1.210000, 1.211000, 1.212000, 1.213000, 1.214000, 1.215000, 1.216000, 1.217000, 1.218000, 1.219000, 1.220000, 1.221000, 1.222000, 1.223000, 1.224000, 1.225000, 1.226000, 1.227000, 1.228000, 1.229000, 1.230000, 1.231000, 1.232000, 1.233000, 1.234000, 1.235000, 1.236000, 1.237000, 1.238000, 1.239000, 1.240000, 1.241000, 1.242000, 1.243000, 1.244000, 1.245000, 1.246000, 1.247000, 1.248000, 1.249000, 1.250000, 1.251000, 1.252000, 1.253000, 1.254000, 1.255000, 1.256000, 1.257000, 1.258000, 1.259000, 1.260000, 1.261000, 1.262000, 1.263000, 1.264000, 1.265000, 1.266000, 1.267000, 1.268000, 1.269000, 1.270000, 1.271000, 1.272000, 1.273000, 1.274000, 1.275000, 1.276000, 1.277000, 1.278000, 1.279000, 1.280000, 1.281000, 1.282000, 1.283000, 1.284000, 1.285000, 1.286000, 1.287000, 1.288000, 1.289000, 1.290000, 1.291000, 1.292000, 1.293000, 1.294000, 1.295000, 1.296000, 1.297000, 1.298000, 1.299000, 1.300000, 1.301000, 1.302000, 1.303000, 1.304000, 1.305000, 1.306000, 1.307000, 1.308000, 1.309000, 1.310000, 1.311000, 1.312000, 1.313000, 1.314000, 1.315000, 1.316000, 1.317000, 1.318000, 1.319000, 1.320000, 1.321000, 1.322000, 1.323000, 1.324000, 1.325000, 1.326000, 1.327000, 1.328000, 1.329000, 1.330000, 1.331000, 1.332000, 1.333000, 1.334000, 1.335000, 1.336000, 1.337000, 1.338000, 1.339000, 1.340000, 1.341000, 1.342000, 1.343000, 1.344000, 1.345000, 1.346000, 1.347000, 1.348000, 1.349000, 1.350000, 1.351000, 1.352000, 1.353000, 1.354000, 1.355000, 1.356000, 1.357000, 1.358000, 1.359000, 1.360000, 1.361000, 1.362000, 1.363000, 1.364000, 1.365000, 1.366000, 1.367000, 1.368000, 1.369000, 1.370000, 1.371000, 1.372000, 1.373000, 1.374000, 1.375000, 1.376000, 1.377000, 1.378000, 1.379000, 1.380000, 1.381000, 1.382000, 1.383000, 1.384000, 1.385000, 1.386000, 1.387000, 1.388000, 1.389000, 1.390000, 1.391000, 1.392000, 1.393000, 1.394000, 1.395000, 1.396000, 1.397000, 1.398000, 1.399000, 1.400000, 1.401000, 1.402000, 1.403000, 1.404000, 1.405000, 1.406000, 1.407000, 1.408000, 1.409000, 1.410000, 1.411000, 1.412000, 1.413000, 1.414000, 1.415000, 1.416000, 1.417000, 1.418000, 1.419000, 1.420000, 1.421000, 1.422000, 1.423000, 1.424000, 1.425000, 1.426000, 1.427000, 1.428000, 1.429000, 1.430000, 1.431000, 1.432000, 1.433000, 1.434000, 1.435000, 1.436000, 1.437000, 1.438000, 1.439000, 1.440000, 1.441000, 1.442000, 1.443000, 1.444000, 1.445000, 1.446000, 1.447000, 1.448000, 1.449000, 1.450000, 1.451000, 1.452000, 1.453000, 1.454000, 1.455000, 1.456000, 1.457000, 1.458000, 1.459000, 1.460000, 1.461000, 1.462000, 1.463000, 1.464000, 1.465000, 1.466000, 1.467000, 1.468000, 1.469000, 1.470000, 1.471000, 1.472000, 1.473000, 1.474000, 1.475000, 1.476000, 1.477000, 1.478000, 1.479000, 1.480000, 1.481000, 1.482000, 1.483000, 1.484000, 1.485000, 1.486000, 1.487000, 1.488000, 1.489000, 1.490000, 1.491000, 1.492000, 1.493000, 1.494000, 1.495000, 1.496000, 1.497000, 1.498000, 1.499000, 1.500000, 1.501000, 1.502000, 1.503000, 1.504000, 1.505000, 1.506000, 1.507000, 1.508000, 1.509000, 1.510000, 1.511000, 1.512000, 1.513000, 1.514000, 1.515000, 1.516000, 1.517000, 1.518000, 1.519000, 1.520000, 1.521000, 1.522000, 1.523000, 1.524000, 1.525000, 1.526000, 1.527000, 1.528000, 1.529000, 1.530000, 1.531000, 1.532000, 1.533000, 1.534000, 1.535000, 1.536000, 1.537000, 1.538000, 1.539000, 1.540000, 1.541000, 1.542000, 1.543000, 1.544000, 1.545000, 1.546000, 1.547000, 1.548000, 1.549000, 1.550000, 1.551000, 1.552000, 1.553000, 1.554000, 1.555000, 1.556000, 1.557000, 1.558000, 1.559000, 1.560000, 1.561000, 1.562000, 1.563000, 1.564000, 1.565000, 1.566000, 1.567000, 1.568000, 1.569000, 1.570000, 1.571000, 1.572000, 1.573000, 1.574000, 1.575000, 1.576000, 1.577000, 1.578000, 1.579000, 1.580000, 1.581000, 1.582000, 1.583000, 1.584000, 1.585000, 1.586000, 1.587000, 1.588000, 1.589000, 1.590000, 1.591000, 1.592000, 1.593000, 1.594000, 1.595000, 1.596000, 1.597000, 1.598000, 1.599000, 1.600000, 1.601000, 1.602000, 1.603000, 1.604000, 1.605000, 1.606000, 1.607000, 1.608000, 1.609000, 1.610000, 1.611000, 1.612000, 1.613000, 1.614000, 1.615000, 1.616000, 1.617000, 1.618000, 1.619000, 1.620000, 1.621000, 1.622000, 1.623000, 1.624000, 1.625000, 1.626000, 1.627000, 1.628000, 1.629000, 1.630000, 1.631000, 1.632000, 1.633000, 1.634000, 1.635000, 1.636000, 1.637000, 1.638000, 1.639000, 1.640000, 1.641000, 1.642000, 1.643000, 1.644000, 1.645000, 1.646000, 1.647000, 1.648000, 1.649000, 1.650000, 1.651000, 1.652000, 1.653000, 1.654000, 1.655000, 1.656000, 1.657000, 1.658000, 1.659000, 1.660000, 1.661000, 1.662000, 1.663000, 1.664000, 1.665000, 1.666000, 1.667000, 1.668000, 1.669000, 1.670000, 1.671000, 1.672000, 1.673000, 1.674000, 1.675000, 1.676000, 1.677000, 1.678000, 1.679000, 1.680000, 1.681000, 1.682000, 1.683000, 1.684000, 1.685000, 1.686000, 1.687000, 1.688000, 1.689000, 1.690000, 1.691000, 1.692000, 1.693000, 1.694000, 1.695000, 1.696000, 1.697000, 1.698000, 1.699000, 1.700000, 1.701000, 1.702000, 1.703000, 1.704000, 1.705000, 1.706000, 1.707000, 1.708000, 1.709000, 1.710000, 1.711000, 1.712000, 1.713000, 1.714000, 1.715000, 1.716000, 1.717000, 1.718000, 1.719000, 1.720000, 1.721000, 1.722000, 1.723000, 1.724000, 1.725000, 1.726000, 1.727000, 1.728000, 1.729000, 1.730000, 1.731000, 1.732000, 1.733000, 1.734000, 1.735000, 1.736000, 1.737000, 1.738000, 1.739000, 1.740000, 1.741000, 1.742000, 1.743000, 1.744000, 1.745000, 1.746000, 1.747000, 1.748000, 1.749000, 1.750000, 1.751000, 1.752000, 1.753000, 1.754000, 1.755000, 1.756000, 1.757000, 1.758000, 1.759000, 1.760000, 1.761000, 1.762000, 1.763000, 1.764000, 1.765000, 1.766000, 1.767000, 1.768000, 1.769000, 1.770000, 1.771000, 1.772000, 1.773000, 1.774000, 1.775000, 1.776000, 1.777000, 1.778000, 1.779000, 1.780000, 1.781000, 1.782000, 1.783000, 1.784000, 1.785000, 1.786000, 1.787000, 1.788000, 1.789000, 1.790000, 1.791000, 1.792000, 1.793000, 1.794000, 1.795000, 1.796000, 1.797000, 1.798000, 1.799000, 1.800000, 1.801000, 1.802000, 1.803000, 1.804000, 1.805000, 1.806000, 1.807000, 1.808000, 1.809000, 1.810000, 1.811000, 1.812000, 1.813000, 1.814000, 1.815000, 1.816000, 1.817000, 1.818000, 1.819000, 1.820000, 1.821000, 1.822000, 1.823000, 1.824000, 1.825000, 1.826000, 1.827000, 1.828000, 1.829000, 1.830000, 1.831000, 1.832000, 1.833000, 1.834000, 1.835000, 1.836000, 1.837000, 1.838000, 1.839000, 1.840000, 1.841000, 1.842000, 1.843000, 1.844000, 1.845000, 1.846000, 1.847000, 1.848000, 1.849000, 1.850000, 1.851000, 1.852000, 1.853000, 1.854000, 1.855000, 1.856000, 1.857000, 1.858000, 1.859000, 1.860000, 1.861000, 1.862000, 1.863000, 1.864000, 1.865000, 1.866000, 1.867000, 1.868000, 1.869000, 1.870000, 1.871000, 1.872000, 1.873000, 1.874000, 1.875000, 1.876000, 1.877000, 1.878000, 1.879000, 1.880000, 1.881000, 1.882000, 1.883000, 1.884000, 1.885000, 1.886000, 1.887000, 1.888000, 1.889000, 1.890000, 1.891000, 1.892000, 1.893000, 1.894000, 1.895000, 1.896000, 1.897000, 1.898000, 1.899000, 1.900000, 1.901000, 1.902000, 1.903000, 1.904000, 1.905000, 1.906000, 1.907000, 1.908000, 1.909000, 1.910000, 1.911000, 1.912000, 1.913000, 1.914000, 1.915000, 1.916000, 1.917000, 1.918000, 1.919000, 1.920000, 1.921000, 1.922000, 1.923000, 1.924000, 1.925000, 1.926000, 1.927000, 1.928000, 1.929000, 1.930000, 1.931000, 1.932000, 1.933000, 1.934000, 1.935000, 1.936000, 1.937000, 1.938000, 1.939000, 1.940000, 1.941000, 1.942000, 1.943000, 1.944000, 1.945000, 1.946000, 1.947000, 1.948000, 1.949000, 1.950000, 1.951000, 1.952000, 1.953000, 1.954000, 1.955000, 1.956000, 1.957000, 1.958000, 1.959000, 1.960000, 1.961000, 1.962000, 1.963000, 1.964000, 1.965000, 1.966000, 1.967000, 1.968000, 1.969000, 1.970000, 1.971000, 1.972000, 1.973000, 1.974000, 1.975000, 1.976000, 1.977000, 1.978000, 1.979000, 1.980000, 1.981000, 1.982000, 1.983000, 1.984000, 1.985000, 1.986000, 1.987000, 1.988000, 1.989000, 1.990000, 1.991000, 1.992000, 1.993000, 1.994000, 1.995000, 1.996000, 1.997000, 1.998000, 1.999000, 2.000000, 2.001000, 2.002000, 2.003000, 2.004000, 2.005000, 2.006000, 2.007000, 2.008000, 2.009000, 2.010000, 2.011000, 2.012000, 2.013000, 2.014000, 2.015000, 2.016000, 2.017000, 2.018000, 2.019000, 2.020000, 2.021000, 2.022000, 2.023000, 2.024000, 2.025000, 2.026000, 2.027000, 2.028000, 2.029000, 2.030000, 2.031000, 2.032000, 2.033000, 2.034000, 2.035000, 2.036000, 2.037000, 2.038000, 2.039000, 2.040000, 2.041000, 2.042000, 2.043000, 2.044000, 2.045000, 2.046000, 2.047000, 2.048000, 2.049000, 2.050000, 2.051000, 2.052000, 2.053000, 2.054000, 2.055000, 2.056000, 2.057000, 2.058000, 2.059000, 2.060000, 2.061000, 2.062000, 2.063000, 2.064000, 2.065000, 2.066000, 2.067000, 2.068000, 2.069000, 2.070000, 2.071000, 2.072000, 2.073000, 2.074000, 2.075000, 2.076000, 2.077000, 2.078000, 2.079000, 2.080000, 2.081000, 2.082000, 2.083000, 2.084000, 2.085000, 2.086000, 2.087000, 2.088000, 2.089000, 2.090000, 2.091000, 2.092000, 2.093000, 2.094000, 2.095000, 2.096000, 2.097000, 2.098000, 2.099000, 2.100000, 2.101000, 2.102000, 2.103000, 2.104000, 2.105000, 2.106000, 2.107000, 2.108000, 2.109000, 2.110000, 2.111000, 2.112000, 2.113000, 2.114000, 2.115000, 2.116000, 2.117000, 2.118000, 2.119000, 2.120000, 2.121000, 2.122000, 2.123000, 2.124000, 2.125000, 2.126000, 2.127000, 2.128000, 2.129000, 2.130000, 2.131000, 2.132000, 2.133000, 2.134000, 2.135000, 2.136000, 2.137000, 2.138000, 2.139000, 2.140000, 2.141000, 2.142000, 2.143000, 2.144000, 2.145000, 2.146000, 2.147000, 2.148000, 2.149000, 2.150000, 2.151000, 2.152000, 2.153000, 2.154000, 2.155000, 2.156000, 2.157000, 2.158000, 2.159000, 2.160000, 2.161000, 2.162000, 2.163000, 2.164000, 2.165000, 2.166000, 2.167000, 2.168000, 2.169000, 2.170000, 2.171000, 2.172000, 2.173000, 2.174000, 2.175000, 2.176000, 2.177000, 2.178000, 2.179000, 2.180000, 2.181000, 2.182000, 2.183000, 2.184000, 2.185000, 2.186000, 2.187000, 2.188000, 2.189000, 2.190000, 2.191000, 2.192000, 2.193000, 2.194000, 2.195000, 2.196000, 2.197000, 2.198000, 2.199000, 2.200000, 2.201000, 2.202000, 2.203000, 2.204000, 2.205000, 2.206000, 2.207000, 2.208000, 2.209000, 2.210000, 2.211000, 2.212000, 2.213000, 2.214000, 2.215000, 2.216000, 2.217000, 2.218000, 2.219000, 2.220000, 2.221000, 2.222000, 2.223000, 2.224000, 2.225000, 2.226000, 2.227000, 2.228000, 2.229000, 2.230000, 2.231000, 2.232000, 2.233000, 2.234000, 2.235000, 2.236000, 2.237000, 2.238000, 2.239000, 2.240000, 2.241000, 2.242000, 2.243000, 2.244000, 2.245000, 2.246000, 2.247000, 2.248000, 2.249000, 2.250000, 2.251000, 2.252000, 2.253000, 2.254000, 2.255000, 2.256000, 2.257000, 2.258000, 2.259000, 2.260000, 2.261000, 2.262000, 2.263000, 2.264000, 2.265000, 2.266000, 2.267000, 2.268000, 2.269000, 2.270000, 2.271000, 2.272000, 2.273000, 2.274000, 2.275000, 2.276000, 2.277000, 2.278000, 2.279000, 2.280000, 2.281000, 2.282000, 2.283000, 2.284000, 2.285000, 2.286000, 2.287000, 2.288000, 2.289000, 2.290000, 2.291000, 2.292000, 2.293000, 2.294000, 2.295000, 2.296000, 2.297000, 2.298000, 2.299000, 2.300000, 2.301000, 2.302000, 2.303000, 2.304000, 2.305000, 2.306000, 2.307000, 2.308000, 2.309000, 2.310000, 2.311000, 2.312000, 2.313000, 2.314000, 2.315000, 2.316000, 2.317000, 2.318000, 2.319000, 2.320000, 2.321000, 2.322000, 2.323000, 2.324000, 2.325000, 2.326000, 2.327000, 2.328000, 2.329000, 2.330000, 2.331000, 2.332000, 2.333000, 2.334000, 2.335000, 2.336000, 2.337000, 2.338000, 2.339000, 2.340000, 2.341000, 2.342000, 2.343000, 2.344000, 2.345000, 2.346000, 2.347000, 2.348000, 2.349000, 2.350000, 2.351000, 2.352000, 2.353000, 2.354000, 2.355000, 2.356000, 2.357000, 2.358000, 2.359000, 2.360000, 2.361000, 2.362000, 2.363000, 2.364000, 2.365000, 2.366000, 2.367000, 2.368000, 2.369000, 2.370000, 2.371000, 2.372000, 2.373000, 2.374000, 2.375000, 2.376000, 2.377000, 2.378000, 2.379000, 2.380000, 2.381000, 2.382000, 2.383000, 2.384000, 2.385000, 2.386000, 2.387000, 2.388000, 2.389000, 2.390000, 2.391000, 2.392000, 2.393000, 2.394000, 2.395000, 2.396000, 2.397000, 2.398000, 2.399000, 2.400000, 2.401000, 2.402000, 2.403000, 2.404000, 2.405000, 2.406000, 2.407000, 2.408000, 2.409000, 2.410000, 2.411000, 2.412000, 2.413000, 2.414000, 2.415000, 2.416000, 2.417000, 2.418000, 2.419000, 2.420000, 2.421000, 2.422000, 2.423000, 2.424000, 2.425000, 2.426000, 2.427000, 2.428000, 2.429000, 2.430000, 2.431000, 2.432000, 2.433000, 2.434000, 2.435000, 2.436000, 2.437000, 2.438000, 2.439000, 2.440000, 2.441000, 2.442000, 2.443000, 2.444000, 2.445000, 2.446000, 2.447000, 2.448000, 2.449000, 2.450000, 2.451000, 2.452000, 2.453000, 2.454000, 2.455000, 2.456000, 2.457000, 2.458000, 2.459000, 2.460000, 2.461000, 2.462000, 2.463000, 2.464000, 2.465000, 2.466000, 2.467000, 2.468000, 2.469000, 2.470000, 2.471000, 2.472000, 2.473000, 2.474000, 2.475000, 2.476000, 2.477000, 2.478000, 2.479000, 2.480000, 2.481000, 2.482000, 2.483000, 2.484000, 2.485000, 2.486000, 2.487000, 2.488000, 2.489000, 2.490000, 2.491000, 2.492000, 2.493000, 2.494000, 2.495000, 2.496000, 2.497000, 2.498000, 2.499000, 2.500000, 2.501000, 2.502000, 2.503000, 2.504000, 2.505000, 2.506000, 2.507000, 2.508000, 2.509000, 2.510000, 2.511000, 2.512000, 2.513000, 2.514000, 2.515000, 2.516000, 2.517000, 2.518000, 2.519000, 2.520000, 2.521000, 2.522000, 2.523000, 2.524000, 2.525000, 2.526000, 2.527000, 2.528000, 2.529000, 2.530000, 2.531000, 2.532000, 2.533000, 2.534000, 2.535000, 2.536000, 2.537000, 2.538000, 2.539000, 2.540000, 2.541000, 2.542000, 2.543000, 2.544000, 2.545000, 2.546000, 2.547000, 2.548000, 2.549000, 2.550000, 2.551000, 2.552000, 2.553000, 2.554000, 2.555000, 2.556000, 2.557000, 2.558000, 2.559000, 2.560000, 2.561000, 2.562000, 2.563000, 2.564000, 2.565000, 2.566000, 2.567000, 2.568000, 2.569000, 2.570000, 2.571000, 2.572000, 2.573000, 2.574000, 2.575000, 2.576000, 2.577000, 2.578000, 2.579000, 2.580000, 2.581000, 2.582000, 2.583000, 2.584000, 2.585000, 2.586000, 2.587000, 2.588000, 2.589000, 2.590000, 2.591000, 2.592000, 2.593000, 2.594000, 2.595000, 2.596000, 2.597000, 2.598000, 2.599000, 2.600000, 2.601000, 2.602000, 2.603000, 2.604000, 2.605000, 2.606000, 2.607000, 2.608000, 2.609000, 2.610000, 2.611000, 2.612000, 2.613000, 2.614000, 2.615000, 2.616000, 2.617000, 2.618000, 2.619000, 2.620000, 2.621000, 2.622000, 2.623000, 2.624000, 2.625000, 2.626000, 2.627000, 2.628000, 2.629000, 2.630000, 2.631000, 2.632000, 2.633000, 2.634000, 2.635000, 2.636000, 2.637000, 2.638000, 2.639000, 2.640000, 2.641000, 2.642000, 2.643000, 2.644000, 2.645000, 2.646000, 2.647000, 2.648000, 2.649000, 2.650000, 2.651000, 2.652000, 2.653000, 2.654000, 2.655000, 2.656000, 2.657000, 2.658000, 2.659000, 2.660000, 2.661000, 2.662000, 2.663000, 2.664000, 2.665000, 2.666000, 2.667000, 2.668000, 2.669000, 2.670000, 2.671000, 2.672000, 2.673000, 2.674000, 2.675000, 2.676000, 2.677000, 2.678000, 2.679000, 2.680000, 2.681000, 2.682000, 2.683000, 2.684000, 2.685000, 2.686000, 2.687000, 2.688000, 2.689000, 2.690000, 2.691000, 2.692000, 2.693000, 2.694000, 2.695000, 2.696000, 2.697000, 2.698000, 2.699000, 2.700000, 2.701000, 2.702000, 2.703000, 2.704000, 2.705000, 2.706000, 2.707000, 2.708000, 2.709000, 2.710000, 2.711000, 2.712000, 2.713000, 2.714000, 2.715000, 2.716000, 2.717000, 2.718000, 2.719000, 2.720000, 2.721000, 2.722000, 2.723000, 2.724000, 2.725000, 2.726000, 2.727000, 2.728000, 2.729000, 2.730000, 2.731000, 2.732000, 2.733000, 2.734000, 2.735000, 2.736000, 2.737000, 2.738000, 2.739000, 2.740000, 2.741000, 2.742000, 2.743000, 2.744000, 2.745000, 2.746000, 2.747000, 2.748000, 2.749000, 2.750000, 2.751000, 2.752000, 2.753000, 2.754000, 2.755000, 2.756000, 2.757000, 2.758000, 2.759000, 2.760000, 2.761000, 2.762000, 2.763000, 2.764000, 2.765000, 2.766000, 2.767000, 2.768000, 2.769000, 2.770000, 2.771000, 2.772000, 2.773000, 2.774000, 2.775000, 2.776000, 2.777000, 2.778000, 2.779000, 2.780000, 2.781000, 2.782000, 2.783000, 2.784000, 2.785000, 2.786000, 2.787000, 2.788000, 2.789000, 2.790000, 2.791000, 2.792000, 2.793000, 2.794000, 2.795000, 2.796000, 2.797000, 2.798000, 2.799000, 2.800000, 2.801000, 2.802000, 2.803000, 2.804000, 2.805000, 2.806000, 2.807000, 2.808000, 2.809000, 2.810000, 2.811000, 2.812000, 2.813000, 2.814000, 2.815000, 2.816000, 2.817000, 2.818000, 2.819000, 2.820000, 2.821000, 2.822000, 2.823000, 2.824000, 2.825000, 2.826000, 2.827000, 2.828000, 2.829000, 2.830000, 2.831000, 2.832000, 2.833000, 2.834000, 2.835000, 2.836000, 2.837000, 2.838000, 2.839000, 2.840000, 2.841000, 2.842000, 2.843000, 2.844000, 2.845000, 2.846000, 2.847000, 2.848000, 2.849000, 2.850000, 2.851000, 2.852000, 2.853000, 2.854000, 2.855000, 2.856000, 2.857000, 2.858000, 2.859000, 2.860000, 2.861000, 2.862000, 2.863000, 2.864000, 2.865000, 2.866000, 2.867000, 2.868000, 2.869000, 2.870000, 2.871000, 2.872000, 2.873000, 2.874000, 2.875000, 2.876000, 2.877000, 2.878000, 2.879000, 2.880000, 2.881000, 2.882000, 2.883000, 2.884000, 2.885000, 2.886000, 2.887000, 2.888000, 2.889000, 2.890000, 2.891000, 2.892000, 2.893000, 2.894000, 2.895000, 2.896000, 2.897000, 2.898000, 2.899000, 2.900000, 2.901000, 2.902000, 2.903000, 2.904000, 2.905000, 2.906000, 2.907000, 2.908000, 2.909000, 2.910000, 2.911000, 2.912000, 2.913000, 2.914000, 2.915000, 2.916000, 2.917000, 2.918000, 2.919000, 2.920000, 2.921000, 2.922000, 2.923000, 2.924000, 2.925000, 2.926000, 2.927000, 2.928000, 2.929000, 2.930000, 2.931000, 2.932000, 2.933000, 2.934000, 2.935000, 2.936000, 2.937000, 2.938000, 2.939000, 2.940000, 2.941000, 2.942000, 2.943000, 2.944000, 2.945000, 2.946000, 2.947000, 2.948000, 2.949000, 2.950000, 2.951000, 2.952000, 2.953000, 2.954000, 2.955000, 2.956000, 2.957000, 2.958000, 2.959000, 2.960000, 2.961000, 2.962000, 2.963000, 2.964000, 2.965000, 2.966000, 2.967000, 2.968000, 2.969000, 2.970000, 2.971000, 2.972000, 2.973000, 2.974000, 2.975000, 2.976000, 2.977000, 2.978000, 2.979000, 2.980000, 2.981000, 2.982000, 2.983000, 2.984000, 2.985000, 2.986000, 2.987000, 2.988000, 2.989000, 2.990000, 2.991000, 2.992000, 2.993000, 2.994000, 2.995000, 2.996000, 2.997000, 2.998000, 2.999000, 3.000000, 3.001000, 3.002000, 3.003000, 3.004000, 3.005000, 3.006000, 3.007000, 3.008000, 3.009000, 3.010000, 3.011000, 3.012000, 3.013000, 3.014000, 3.015000, 3.016000, 3.017000, 3.018000, 3.019000, 3.020000, 3.021000, 3.022000, 3.023000, 3.024000, 3.025000, 3.026000, 3.027000, 3.028000, 3.029000, 3.030000, 3.031000, 3.032000, 3.033000, 3.034000, 3.035000, 3.036000, 3.037000, 3.038000, 3.039000, 3.040000, 3.041000, 3.042000, 3.043000, 3.044000, 3.045000, 3.046000, 3.047000, 3.048000, 3.049000, 3.050000, 3.051000, 3.052000, 3.053000, 3.054000, 3.055000, 3.056000, 3.057000, 3.058000, 3.059000, 3.060000, 3.061000, 3.062000, 3.063000, 3.064000, 3.065000, 3.066000, 3.067000, 3.068000, 3.069000, 3.070000, 3.071000, 3.072000, 3.073000, 3.074000, 3.075000, 3.076000, 3.077000, 3.078000, 3.079000, 3.080000, 3.081000, 3.082000, 3.083000, 3.084000, 3.085000, 3.086000, 3.087000, 3.088000, 3.089000, 3.090000, 3.091000, 3.092000, 3.093000, 3.094000, 3.095000, 3.096000, 3.097000, 3.098000, 3.099000, 3.100000, 3.101000, 3.102000, 3.103000, 3.104000, 3.105000, 3.106000, 3.107000, 3.108000, 3.109000, 3.110000, 3.111000, 3.112000, 3.113000, 3.114000, 3.115000, 3.116000, 3.117000, 3.118000, 3.119000, 3.120000, 3.121000, 3.122000, 3.123000, 3.124000, 3.125000, 3.126000, 3.127000, 3.128000, 3.129000, 3.130000, 3.131000, 3.132000, 3.133000, 3.134000, 3.135000, 3.136000, 3.137000, 3.138000, 3.139000, 3.140000, 3.141000, 3.142000, 3.143000, 3.144000, 3.145000, 3.146000, 3.147000, 3.148000, 3.149000, 3.150000, 3.151000, 3.152000, 3.153000, 3.154000, 3.155000, 3.156000, 3.157000, 3.158000, 3.159000, 3.160000, 3.161000, 3.162000, 3.163000, 3.164000, 3.165000, 3.166000, 3.167000, 3.168000, 3.169000, 3.170000, 3.171000, 3.172000, 3.173000, 3.174000, 3.175000, 3.176000, 3.177000, 3.178000, 3.179000, 3.180000, 3.181000, 3.182000, 3.183000, 3.184000, 3.185000, 3.186000, 3.187000, 3.188000, 3.189000, 3.190000, 3.191000, 3.192000, 3.193000, 3.194000, 3.195000, 3.196000, 3.197000, 3.198000, 3.199000, 3.200000, 3.201000, 3.202000, 3.203000, 3.204000, 3.205000, 3.206000, 3.207000, 3.208000, 3.209000, 3.210000, 3.211000, 3.212000, 3.213000, 3.214000, 3.215000, 3.216000, 3.217000, 3.218000, 3.219000, 3.220000, 3.221000, 3.222000, 3.223000, 3.224000, 3.225000, 3.226000, 3.227000, 3.228000, 3.229000, 3.230000, 3.231000, 3.232000, 3.233000, 3.234000, 3.235000, 3.236000, 3.237000, 3.238000, 3.239000, 3.240000, 3.241000, 3.242000, 3.243000, 3.244000, 3.245000, 3.246000, 3.247000, 3.248000, 3.249000, 3.250000, 3.251000, 3.252000, 3.253000, 3.254000, 3.255000, 3.256000, 3.257000, 3.258000, 3.259000, 3.260000, 3.261000, 3.262000, 3.263000, 3.264000, 3.265000, 3.266000, 3.267000, 3.268000, 3.269000, 3.270000, 3.271000, 3.272000, 3.273000, 3.274000, 3.275000, 3.276000, 3.277000, 3.278000, 3.279000, 3.280000, 3.281000, 3.282000, 3.283000, 3.284000, 3.285000, 3.286000, 3.287000, 3.288000, 3.289000, 3.290000, 3.291000, 3.292000, 3.293000, 3.294000, 3.295000, 3.296000, 3.297000, 3.298000, 3.299000, 3.300000, 3.301000, 3.302000, 3.303000, 3.304000, 3.305000, 3.306000, 3.307000, 3.308000, 3.309000, 3.310000, 3.311000, 3.312000, 3.313000, 3.314000, 3.315000, 3.316000, 3.317000, 3.318000, 3.319000, 3.320000, 3.321000, 3.322000, 3.323000, 3.324000, 3.325000, 3.326000, 3.327000, 3.328000, 3.329000, 3.330000, 3.331000, 3.332000, 3.333000, 3.334000, 3.335000, 3.336000, 3.337000, 3.338000, 3.339000, 3.340000, 3.341000, 3.342000, 3.343000, 3.344000, 3.345000, 3.346000, 3.347000, 3.348000, 3.349000, 3.350000, 3.351000, 3.352000, 3.353000, 3.354000, 3.355000, 3.356000, 3.357000, 3.358000, 3.359000, 3.360000, 3.361000, 3.362000, 3.363000, 3.364000, 3.365000, 3.366000, 3.367000, 3.368000, 3.369000, 3.370000, 3.371000, 3.372000, 3.373000, 3.374000, 3.375000, 3.376000, 3.377000, 3.378000, 3.379000, 3.380000, 3.381000, 3.382000, 3.383000, 3.384000, 3.385000, 3.386000, 3.387000, 3.388000, 3.389000, 3.390000, 3.391000, 3.392000, 3.393000, 3.394000, 3.395000, 3.396000, 3.397000, 3.398000, 3.399000, 3.400000, 3.401000, 3.402000, 3.403000, 3.404000, 3.405000, 3.406000, 3.407000, 3.408000, 3.409000, 3.410000, 3.411000, 3.412000, 3.413000, 3.414000, 3.415000, 3.416000, 3.417000, 3.418000, 3.419000, 3.420000, 3.421000, 3.422000, 3.423000, 3.424000, 3.425000, 3.426000, 3.427000, 3.428000, 3.429000, 3.430000, 3.431000, 3.432000, 3.433000, 3.434000, 3.435000, 3.436000, 3.437000, 3.438000, 3.439000, 3.440000, 3.441000, 3.442000, 3.443000, 3.444000, 3.445000, 3.446000, 3.447000, 3.448000, 3.449000, 3.450000, 3.451000, 3.452000, 3.453000, 3.454000, 3.455000, 3.456000, 3.457000, 3.458000, 3.459000, 3.460000, 3.461000, 3.462000, 3.463000, 3.464000, 3.465000, 3.466000, 3.467000, 3.468000, 3.469000, 3.470000, 3.471000, 3.472000, 3.473000, 3.474000, 3.475000, 3.476000, 3.477000, 3.478000, 3.479000, 3.480000, 3.481000, 3.482000, 3.483000, 3.484000, 3.485000, 3.486000, 3.487000, 3.488000, 3.489000, 3.490000, 3.491000, 3.492000, 3.493000, 3.494000, 3.495000, 3.496000, 3.497000, 3.498000, 3.499000, 3.500000, 3.501000, 3.502000, 3.503000, 3.504000, 3.505000, 3.506000, 3.507000, 3.508000, 3.509000, 3.510000, 3.511000, 3.512000, 3.513000, 3.514000, 3.515000, 3.516000, 3.517000, 3.518000, 3.519000, 3.520000, 3.521000, 3.522000, 3.523000, 3.524000, 3.525000, 3.526000, 3.527000, 3.528000, 3.529000, 3.530000, 3.531000, 3.532000, 3.533000, 3.534000, 3.535000, 3.536000, 3.537000, 3.538000, 3.539000, 3.540000, 3.541000, 3.542000, 3.543000, 3.544000, 3.545000, 3.546000, 3.547000, 3.548000, 3.549000, 3.550000, 3.551000, 3.552000, 3.553000, 3.554000, 3.555000, 3.556000, 3.557000, 3.558000, 3.559000, 3.560000, 3.561000, 3.562000, 3.563000, 3.564000, 3.565000, 3.566000, 3.567000, 3.568000, 3.569000, 3.570000, 3.571000, 3.572000, 3.573000, 3.574000, 3.575000, 3.576000, 3.577000, 3.578000, 3.579000, 3.580000, 3.581000, 3.582000, 3.583000, 3.584000, 3.585000, 3.586000, 3.587000, 3.588000, 3.589000, 3.590000, 3.591000, 3.592000, 3.593000, 3.594000, 3.595000, 3.596000, 3.597000, 3.598000, 3.599000, 3.600000, 3.601000, 3.602000, 3.603000, 3.604000, 3.605000, 3.606000, 3.607000, 3.608000, 3.609000, 3.610000, 3.611000, 3.612000, 3.613000, 3.614000, 3.615000, 3.616000, 3.617000, 3.618000, 3.619000, 3.620000, 3.621000, 3.622000, 3.623000, 3.624000, 3.625000, 3.626000, 3.627000, 3.628000, 3.629000, 3.630000, 3.631000, 3.632000, 3.633000, 3.634000, 3.635000, 3.636000, 3.637000, 3.638000, 3.639000, 3.640000, 3.641000, 3.642000, 3.643000, 3.644000, 3.645000, 3.646000, 3.647000, 3.648000, 3.649000, 3.650000, 3.651000, 3.652000, 3.653000, 3.654000, 3.655000, 3.656000, 3.657000, 3.658000, 3.659000, 3.660000, 3.661000, 3.662000, 3.663000, 3.664000, 3.665000, 3.666000, 3.667000, 3.668000, 3.669000, 3.670000, 3.671000, 3.672000, 3.673000, 3.674000, 3.675000, 3.676000, 3.677000, 3.678000, 3.679000, 3.680000, 3.681000, 3.682000, 3.683000, 3.684000, 3.685000, 3.686000, 3.687000, 3.688000, 3.689000, 3.690000, 3.691000, 3.692000, 3.693000, 3.694000, 3.695000, 3.696000, 3.697000, 3.698000, 3.699000, 3.700000, 3.701000, 3.702000, 3.703000, 3.704000, 3.705000, 3.706000, 3.707000, 3.708000, 3.709000, 3.710000, 3.711000, 3.712000, 3.713000, 3.714000, 3.715000, 3.716000, 3.717000, 3.718000, 3.719000, 3.720000, 3.721000, 3.722000, 3.723000, 3.724000, 3.725000, 3.726000, 3.727000, 3.728000, 3.729000, 3.730000, 3.731000, 3.732000, 3.733000, 3.734000, 3.735000, 3.736000, 3.737000, 3.738000, 3.739000, 3.740000, 3.741000, 3.742000, 3.743000, 3.744000, 3.745000, 3.746000, 3.747000, 3.748000, 3.749000, 3.750000, 3.751000, 3.752000, 3.753000, 3.754000, 3.755000, 3.756000, 3.757000, 3.758000, 3.759000, 3.760000, 3.761000, 3.762000, 3.763000, 3.764000, 3.765000, 3.766000, 3.767000, 3.768000, 3.769000, 3.770000, 3.771000, 3.772000, 3.773000, 3.774000, 3.775000, 3.776000, 3.777000, 3.778000, 3.779000, 3.780000, 3.781000, 3.782000, 3.783000, 3.784000, 3.785000, 3.786000, 3.787000, 3.788000, 3.789000, 3.790000, 3.791000, 3.792000, 3.793000, 3.794000, 3.795000, 3.796000, 3.797000, 3.798000, 3.799000, 3.800000, 3.801000, 3.802000, 3.803000, 3.804000, 3.805000, 3.806000, 3.807000, 3.808000, 3.809000, 3.810000, 3.811000, 3.812000, 3.813000, 3.814000, 3.815000, 3.816000, 3.817000, 3.818000, 3.819000, 3.820000, 3.821000, 3.822000, 3.823000, 3.824000, 3.825000, 3.826000, 3.827000, 3.828000, 3.829000, 3.830000, 3.831000, 3.832000, 3.833000, 3.834000, 3.835000, 3.836000, 3.837000, 3.838000, 3.839000, 3.840000, 3.841000, 3.842000, 3.843000, 3.844000, 3.845000, 3.846000, 3.847000, 3.848000, 3.849000, 3.850000, 3.851000, 3.852000, 3.853000, 3.854000, 3.855000, 3.856000, 3.857000, 3.858000, 3.859000, 3.860000, 3.861000, 3.862000, 3.863000, 3.864000, 3.865000, 3.866000, 3.867000, 3.868000, 3.869000, 3.870000, 3.871000, 3.872000, 3.873000, 3.874000, 3.875000, 3.876000, 3.877000, 3.878000, 3.879000, 3.880000, 3.881000, 3.882000, 3.883000, 3.884000, 3.885000, 3.886000, 3.887000, 3.888000, 3.889000, 3.890000, 3.891000, 3.892000, 3.893000, 3.894000, 3.895000, 3.896000, 3.897000, 3.898000, 3.899000, 3.900000, 3.901000, 3.902000, 3.903000, 3.904000, 3.905000, 3.906000, 3.907000, 3.908000, 3.909000, 3.910000, 3.911000, 3.912000, 3.913000, 3.914000, 3.915000, 3.916000, 3.917000, 3.918000, 3.919000, 3.920000, 3.921000, 3.922000, 3.923000, 3.924000, 3.925000, 3.926000, 3.927000, 3.928000, 3.929000, 3.930000, 3.931000, 3.932000, 3.933000, 3.934000, 3.935000, 3.936000, 3.937000, 3.938000, 3.939000, 3.940000, 3.941000, 3.942000, 3.943000, 3.944000, 3.945000, 3.946000, 3.947000, 3.948000, 3.949000, 3.950000, 3.951000, 3.952000, 3.953000, 3.954000, 3.955000, 3.956000, 3.957000, 3.958000, 3.959000, 3.960000, 3.961000, 3.962000, 3.963000, 3.964000, 3.965000, 3.966000, 3.967000, 3.968000, 3.969000, 3.970000, 3.971000, 3.972000, 3.973000, 3.974000, 3.975000, 3.976000, 3.977000, 3.978000, 3.979000, 3.980000, 3.981000, 3.982000, 3.983000, 3.984000, 3.985000, 3.986000, 3.987000, 3.988000, 3.989000, 3.990000, 3.991000, 3.992000, 3.993000, 3.994000, 3.995000, 3.996000, 3.997000, 3.998000, 3.999000, 4.000000, 4.001000, 4.002000, 4.003000, 4.004000, 4.005000, 4.006000, 4.007000, 4.008000, 4.009000, 4.010000, 4.011000, 4.012000, 4.013000, 4.014000, 4.015000, 4.016000, 4.017000, 4.018000, 4.019000, 4.020000, 4.021000, 4.022000, 4.023000, 4.024000, 4.025000, 4.026000, 4.027000, 4.028000, 4.029000, 4.030000, 4.031000, 4.032000, 4.033000, 4.034000, 4.035000, 4.036000, 4.037000, 4.038000, 4.039000, 4.040000, 4.041000, 4.042000, 4.043000, 4.044000, 4.045000, 4.046000, 4.047000, 4.048000, 4.049000, 4.050000, 4.051000, 4.052000, 4.053000, 4.054000, 4.055000, 4.056000, 4.057000, 4.058000, 4.059000, 4.060000, 4.061000, 4.062000, 4.063000, 4.064000, 4.065000, 4.066000, 4.067000, 4.068000, 4.069000, 4.070000, 4.071000, 4.072000, 4.073000, 4.074000, 4.075000, 4.076000, 4.077000, 4.078000, 4.079000, 4.080000, 4.081000, 4.082000, 4.083000, 4.084000, 4.085000, 4.086000, 4.087000, 4.088000, 4.089000, 4.090000, 4.091000, 4.092000, 4.093000, 4.094000, 4.095000, 4.096000, 4.097000, 4.098000, 4.099000, 4.100000, 4.101000, 4.102000, 4.103000, 4.104000, 4.105000, 4.106000, 4.107000, 4.108000, 4.109000, 4.110000, 4.111000, 4.112000, 4.113000, 4.114000, 4.115000, 4.116000, 4.117000, 4.118000, 4.119000, 4.120000, 4.121000, 4.122000, 4.123000, 4.124000, 4.125000, 4.126000, 4.127000, 4.128000, 4.129000, 4.130000, 4.131000, 4.132000, 4.133000, 4.134000, 4.135000, 4.136000, 4.137000, 4.138000, 4.139000, 4.140000, 4.141000, 4.142000, 4.143000, 4.144000, 4.145000, 4.146000, 4.147000, 4.148000, 4.149000, 4.150000, 4.151000, 4.152000, 4.153000, 4.154000, 4.155000, 4.156000, 4.157000, 4.158000, 4.159000, 4.160000, 4.161000, 4.162000, 4.163000, 4.164000, 4.165000, 4.166000, 4.167000, 4.168000, 4.169000, 4.170000, 4.171000, 4.172000, 4.173000, 4.174000, 4.175000, 4.176000, 4.177000, 4.178000, 4.179000, 4.180000, 4.181000, 4.182000, 4.183000, 4.184000, 4.185000, 4.186000, 4.187000, 4.188000, 4.189000, 4.190000, 4.191000, 4.192000, 4.193000, 4.194000, 4.195000, 4.196000, 4.197000, 4.198000, 4.199000, 4.200000, 4.201000, 4.202000, 4.203000, 4.204000, 4.205000, 4.206000, 4.207000, 4.208000, 4.209000, 4.210000, 4.211000, 4.212000, 4.213000, 4.214000, 4.215000, 4.216000, 4.217000, 4.218000, 4.219000, 4.220000, 4.221000, 4.222000, 4.223000, 4.224000, 4.225000, 4.226000, 4.227000, 4.228000, 4.229000, 4.230000, 4.231000, 4.232000, 4.233000, 4.234000, 4.235000, 4.236000, 4.237000, 4.238000, 4.239000, 4.240000, 4.241000, 4.242000, 4.243000, 4.244000, 4.245000, 4.246000, 4.247000, 4.248000, 4.249000, 4.250000, 4.251000, 4.252000, 4.253000, 4.254000, 4.255000, 4.256000, 4.257000, 4.258000, 4.259000, 4.260000, 4.261000, 4.262000, 4.263000, 4.264000, 4.265000, 4.266000, 4.267000, 4.268000, 4.269000, 4.270000, 4.271000, 4.272000, 4.273000, 4.274000, 4.275000, 4.276000, 4.277000, 4.278000, 4.279000, 4.280000, 4.281000, 4.282000, 4.283000, 4.284000, 4.285000, 4.286000, 4.287000, 4.288000, 4.289000, 4.290000, 4.291000, 4.292000, 4.293000, 4.294000, 4.295000, 4.296000, 4.297000, 4.298000, 4.299000, 4.300000, 4.301000, 4.302000, 4.303000, 4.304000, 4.305000, 4.306000, 4.307000, 4.308000, 4.309000, 4.310000, 4.311000, 4.312000, 4.313000, 4.314000, 4.315000, 4.316000, 4.317000, 4.318000, 4.319000, 4.320000, 4.321000, 4.322000, 4.323000, 4.324000, 4.325000, 4.326000, 4.327000, 4.328000, 4.329000, 4.330000, 4.331000, 4.332000, 4.333000, 4.334000, 4.335000, 4.336000, 4.337000, 4.338000, 4.339000, 4.340000, 4.341000, 4.342000, 4.343000, 4.344000, 4.345000, 4.346000, 4.347000, 4.348000, 4.349000, 4.350000, 4.351000, 4.352000, 4.353000, 4.354000, 4.355000, 4.356000, 4.357000, 4.358000, 4.359000, 4.360000, 4.361000, 4.362000, 4.363000, 4.364000, 4.365000, 4.366000, 4.367000, 4.368000, 4.369000, 4.370000, 4.371000, 4.372000, 4.373000, 4.374000, 4.375000, 4.376000, 4.377000, 4.378000, 4.379000, 4.380000, 4.381000, 4.382000, 4.383000, 4.384000, 4.385000, 4.386000, 4.387000, 4.388000, 4.389000, 4.390000, 4.391000, 4.392000, 4.393000, 4.394000, 4.395000, 4.396000, 4.397000, 4.398000, 4.399000, 4.400000, 4.401000, 4.402000, 4.403000, 4.404000, 4.405000, 4.406000, 4.407000, 4.408000, 4.409000, 4.410000, 4.411000, 4.412000, 4.413000, 4.414000, 4.415000, 4.416000, 4.417000, 4.418000, 4.419000, 4.420000, 4.421000, 4.422000, 4.423000, 4.424000, 4.425000, 4.426000, 4.427000, 4.428000, 4.429000, 4.430000, 4.431000, 4.432000, 4.433000, 4.434000, 4.435000, 4.436000, 4.437000, 4.438000, 4.439000, 4.440000, 4.441000, 4.442000, 4.443000, 4.444000, 4.445000, 4.446000, 4.447000, 4.448000, 4.449000, 4.450000, 4.451000, 4.452000, 4.453000, 4.454000, 4.455000, 4.456000, 4.457000, 4.458000, 4.459000, 4.460000, 4.461000, 4.462000, 4.463000, 4.464000, 4.465000, 4.466000, 4.467000, 4.468000, 4.469000, 4.470000, 4.471000, 4.472000, 4.473000, 4.474000, 4.475000, 4.476000, 4.477000, 4.478000, 4.479000, 4.480000, 4.481000, 4.482000, 4.483000, 4.484000, 4.485000, 4.486000, 4.487000, 4.488000, 4.489000, 4.490000, 4.491000, 4.492000, 4.493000, 4.494000, 4.495000, 4.496000, 4.497000, 4.498000, 4.499000, 4.500000, 4.501000, 4.502000, 4.503000, 4.504000, 4.505000, 4.506000, 4.507000, 4.508000, 4.509000, 4.510000, 4.511000, 4.512000, 4.513000, 4.514000, 4.515000, 4.516000, 4.517000, 4.518000, 4.519000, 4.520000, 4.521000, 4.522000, 4.523000, 4.524000, 4.525000, 4.526000, 4.527000, 4.528000, 4.529000, 4.530000, 4.531000, 4.532000, 4.533000, 4.534000, 4.535000, 4.536000, 4.537000, 4.538000, 4.539000, 4.540000, 4.541000, 4.542000, 4.543000, 4.544000, 4.545000, 4.546000, 4.547000, 4.548000, 4.549000, 4.550000, 4.551000, 4.552000, 4.553000, 4.554000, 4.555000, 4.556000, 4.557000, 4.558000, 4.559000, 4.560000, 4.561000, 4.562000, 4.563000, 4.564000, 4.565000, 4.566000, 4.567000, 4.568000, 4.569000, 4.570000, 4.571000, 4.572000, 4.573000, 4.574000, 4.575000, 4.576000, 4.577000, 4.578000, 4.579000, 4.580000, 4.581000, 4.582000, 4.583000, 4.584000, 4.585000, 4.586000, 4.587000, 4.588000, 4.589000, 4.590000, 4.591000, 4.592000, 4.593000, 4.594000, 4.595000, 4.596000, 4.597000, 4.598000, 4.599000, 4.600000, 4.601000, 4.602000, 4.603000, 4.604000, 4.605000, 4.606000, 4.607000, 4.608000, 4.609000, 4.610000, 4.611000, 4.612000, 4.613000, 4.614000, 4.615000, 4.616000, 4.617000, 4.618000, 4.619000, 4.620000, 4.621000, 4.622000, 4.623000, 4.624000, 4.625000, 4.626000, 4.627000, 4.628000, 4.629000, 4.630000, 4.631000, 4.632000, 4.633000, 4.634000, 4.635000, 4.636000, 4.637000, 4.638000, 4.639000, 4.640000, 4.641000, 4.642000, 4.643000, 4.644000, 4.645000, 4.646000, 4.647000, 4.648000, 4.649000, 4.650000, 4.651000, 4.652000, 4.653000, 4.654000, 4.655000, 4.656000, 4.657000, 4.658000, 4.659000, 4.660000, 4.661000, 4.662000, 4.663000, 4.664000, 4.665000, 4.666000, 4.667000, 4.668000, 4.669000, 4.670000, 4.671000, 4.672000, 4.673000, 4.674000, 4.675000, 4.676000, 4.677000, 4.678000, 4.679000, 4.680000, 4.681000, 4.682000, 4.683000, 4.684000, 4.685000, 4.686000, 4.687000, 4.688000, 4.689000, 4.690000, 4.691000, 4.692000, 4.693000, 4.694000, 4.695000, 4.696000, 4.697000, 4.698000, 4.699000, 4.700000, 4.701000, 4.702000, 4.703000, 4.704000, 4.705000, 4.706000, 4.707000, 4.708000, 4.709000, 4.710000, 4.711000, 4.712000, 4.713000, 4.714000, 4.715000, 4.716000, 4.717000, 4.718000, 4.719000, 4.720000, 4.721000, 4.722000, 4.723000, 4.724000, 4.725000, 4.726000, 4.727000, 4.728000, 4.729000, 4.730000, 4.731000, 4.732000, 4.733000, 4.734000, 4.735000, 4.736000, 4.737000, 4.738000, 4.739000, 4.740000, 4.741000, 4.742000, 4.743000, 4.744000, 4.745000, 4.746000, 4.747000, 4.748000, 4.749000, 4.750000, 4.751000, 4.752000, 4.753000, 4.754000, 4.755000, 4.756000, 4.757000, 4.758000, 4.759000, 4.760000, 4.761000, 4.762000, 4.763000, 4.764000, 4.765000, 4.766000, 4.767000, 4.768000, 4.769000, 4.770000, 4.771000, 4.772000, 4.773000, 4.774000, 4.775000, 4.776000, 4.777000, 4.778000, 4.779000, 4.780000, 4.781000, 4.782000, 4.783000, 4.784000, 4.785000, 4.786000, 4.787000, 4.788000, 4.789000, 4.790000, 4.791000, 4.792000, 4.793000, 4.794000, 4.795000, 4.796000, 4.797000, 4.798000, 4.799000, 4.800000, 4.801000, 4.802000, 4.803000, 4.804000, 4.805000, 4.806000, 4.807000, 4.808000, 4.809000, 4.810000, 4.811000, 4.812000, 4.813000, 4.814000, 4.815000, 4.816000, 4.817000, 4.818000, 4.819000, 4.820000, 4.821000, 4.822000, 4.823000, 4.824000, 4.825000, 4.826000, 4.827000, 4.828000, 4.829000, 4.830000, 4.831000, 4.832000, 4.833000, 4.834000, 4.835000, 4.836000, 4.837000, 4.838000, 4.839000, 4.840000, 4.841000, 4.842000, 4.843000, 4.844000, 4.845000, 4.846000, 4.847000, 4.848000, 4.849000, 4.850000, 4.851000, 4.852000, 4.853000, 4.854000, 4.855000, 4.856000, 4.857000, 4.858000, 4.859000, 4.860000, 4.861000, 4.862000, 4.863000, 4.864000, 4.865000, 4.866000, 4.867000, 4.868000, 4.869000, 4.870000, 4.871000, 4.872000, 4.873000, 4.874000, 4.875000, 4.876000, 4.877000, 4.878000, 4.879000, 4.880000, 4.881000, 4.882000, 4.883000, 4.884000, 4.885000, 4.886000, 4.887000, 4.888000, 4.889000, 4.890000, 4.891000, 4.892000, 4.893000, 4.894000, 4.895000, 4.896000, 4.897000, 4.898000, 4.899000, 4.900000, 4.901000, 4.902000, 4.903000, 4.904000, 4.905000, 4.906000, 4.907000, 4.908000, 4.909000, 4.910000, 4.911000, 4.912000, 4.913000, 4.914000, 4.915000, 4.916000, 4.917000, 4.918000, 4.919000, 4.920000, 4.921000, 4.922000, 4.923000, 4.924000, 4.925000, 4.926000, 4.927000, 4.928000, 4.929000, 4.930000, 4.931000, 4.932000, 4.933000, 4.934000, 4.935000, 4.936000, 4.937000, 4.938000, 4.939000, 4.940000, 4.941000, 4.942000, 4.943000, 4.944000, 4.945000, 4.946000, 4.947000, 4.948000, 4.949000, 4.950000, 4.951000, 4.952000, 4.953000, 4.954000, 4.955000, 4.956000, 4.957000, 4.958000, 4.959000, 4.960000, 4.961000, 4.962000, 4.963000, 4.964000, 4.965000, 4.966000, 4.967000, 4.968000, 4.969000, 4.970000, 4.971000, 4.972000, 4.973000, 4.974000, 4.975000, 4.976000, 4.977000, 4.978000, 4.979000, 4.980000, 4.981000, 4.982000, 4.983000, 4.984000, 4.985000, 4.986000, 4.987000, 4.988000, 4.989000, 4.990000, 4.991000, 4.992000, 4.993000, 4.994000, 4.995000, 4.996000, 4.997000, 4.998000, 4.999000, 5.000000
0.031435, 0.031442, 0.031449, 0.031456, 0.031463, 0.031471, 0.031478, 0.031485, 0.031492, 0.031499, 0.031507, 0.031514, 0.031522, 0.031529, 0.031537, 0.031544, 0.031552, 0.031559, 0.031567, 0.031575, 0.031582, 0.031590, 0.031598, 0.031606, 0.031614, 0.031622, 0.031630, 0.031638, 0.031646, 0.031655, 0.031663, 0.031671, 0.031680, 0.031688, 0.031697, 0.031705, 0.031714, 0.031722, 0.031731, 0.031739, 0.031748, 0.031757, 0.031766, 0.031775, 0.031783, 0.031792, 0.031801, 0.031810, 0.031819, 0.031828, 0.031837, 0.031847, 0.031856, 0.031865, 0.031874, 0.031884, 0.031893, 0.031902, 0.031912, 0.031921, 0.031931, 0.031940, 0.031949, 0.031959, 0.031969, 0.031978, 0.031988, 0.031997, 0.032007, 0.032016, 0.032026, 0.032035, 0.032045, 0.032055, 0.032064, 0.032074, 0.032083, 0.032093, 0.032103, 0.032112, 0.032122, 0.032131, 0.032140, 0.032150, 0.032159, 0.032169, 0.032178, 0.032187, 0.032197, 0.032206, 0.032215, 0.032224, 0.032233, 0.032242, 0.032251, 0.032260, 0.032269, 0.032278, 0.032286, 0.032295, 0.032304, 0.032312, 0.032321, 0.032329, 0.032337, 0.032345, 0.032353, 0.032361, 0.032369, 0.032377, 0.032385, 0.032392, 0.032400, 0.032407, 0.032414, 0.032421, 0.032428, 0.032435, 0.032442, 0.032449, 0.032455, 0.032461, 0.032468, 0.032474, 0.032480, 0.032485, 0.032491, 0.032496, 0.032502, 0.032507, 0.032512, 0.032517, 0.032522, 0.032526, 0.032531, 0.032535, 0.032539, 0.032543, 0.032547, 0.032551, 0.032555, 0.032558, 0.032561, 0.032564, 0.032567, 0.032570, 0.032572, 0.032575, 0.032577, 0.032579, 0.032581, 0.032583, 0.032584, 0.032585, 0.032587, 0.032588, 0.032589, 0.032589, 0.032590, 0.032590, 0.032590, 0.032590, 0.032590, 0.032589, 0.032589, 0.032588, 0.032587, 0.032586, 0.032585, 0.032583, 0.032582, 0.032580, 0.032578, 0.032576, 0.032574, 0.032572, 0.032569, 0.032566, 0.032563, 0.032560, 0.032557, 0.032553, 0.032550, 0.032546, 0.032542, 0.032538, 0.032534, 0.032529, 0.032525, 0.032520, 0.032515, 0.032510, 0.032505, 0.032500, 0.032495, 0.032489, 0.032483, 0.032478, 0.032472, 0.032465, 0.032459, 0.032453, 0.032446, 0.032440, 0.032433, 0.032426, 0.032419, 0.032412, 0.032404, 0.032397, 0.032389, 0.032381, 0.032374, 0.032365, 0.032357, 0.032349, 0.032341, 0.032332, 0.032324, 0.032316, 0.032307, 0.032298, 0.032289, 0.032280, 0.032271, 0.032262, 0.032253, 0.032243, 0.032234, 0.032224, 0.032215, 0.032205, 0.032195, 0.032185, 0.032175, 0.032165, 0.032155, 0.032145, 0.032134, 0.032124, 0.032113, 0.032103, 0.032092, 0.032081, 0.032070, 0.032060, 0.032049, 0.032038, 0.032026, 0.032015, 0.032004, 0.031993, 0.031981, 0.031970, 0.031958, 0.031947, 0.031935, 0.031924, 0.031912, 0.031900, 0.031888, 0.031877, 0.031864, 0.031852, 0.031840, 0.031828, 0.031816, 0.031804, 0.031792, 0.031779, 0.031767, 0.031755, 0.031742, 0.031730, 0.031718, 0.031705, 0.031693, 0.031680, 0.031668, 0.031655, 0.031642, 0.031630, 0.031617, 0.031604, 0.031592, 0.031579, 0.031566, 0.031553, 0.031541, 0.031528, 0.031515, 0.031502, 0.031490, 0.031477, 0.031464, 0.031451, 0.031439, 0.031426, 0.031413, 0.031400, 0.031387, 0.031375, 0.031362, 0.031349, 0.031337, 0.031324, 0.031312, 0.031299, 0.031287, 0.031274, 0.031262, 0.031249, 0.031237, 0.031225, 0.031212, 0.031200, 0.031188, 0.031176, 0.031164, 0.031153, 0.031141, 0.031129, 0.031117, 0.031106, 0.031094, 0.031083, 0.031071, 0.031060, 0.031049, 0.031038, 0.031027, 0.031016, 0.031006, 0.030995, 0.030985, 0.030974, 0.030964, 0.030954, 0.030944, 0.030934, 0.030924, 0.030915, 0.030905, 0.030896, 0.030887, 0.030878, 0.030869, 0.030860, 0.030852, 0.030844, 0.030836, 0.030828, 0.030820, 0.030813, 0.030805, 0.030798, 0.030791, 0.030785, 0.030778, 0.030772, 0.030766, 0.030760, 0.030754, 0.030748, 0.030743, 0.030738, 0.030733, 0.030728, 0.030724, 0.030720, 0.030716, 0.030713, 0.030709, 0.030706, 0.030703, 0.030701, 0.030698, 0.030696, 0.030694, 0.030693, 0.030691, 0.030690, 0.030689, 0.030689, 0.030689, 0.030689, 0.030689, 0.030690, 0.030691, 0.030692, 0.030693, 0.030695, 0.030697, 0.030700, 0.030702, 0.030705, 0.030709, 0.030712, 0.030716, 0.030720, 0.030724, 0.030729, 0.030734, 0.030739, 0.030745, 0.030750, 0.030756, 0.030763, 0.030770, 0.030777, 0.030784, 0.030791, 0.030799, 0.030808, 0.030816, 0.030825, 0.030834, 0.030843, 0.030853, 0.030863, 0.030873, 0.030884, 0.030895, 0.030906, 0.030917, 0.030929, 0.030940, 0.030953, 0.030965, 0.030978, 0.030991, 0.031004, 0.031018, 0.031031, 0.031045, 0.031060, 0.031074, 0.031089, 0.031104, 0.031119, 0.031135, 0.031151, 0.031167, 0.031183, 0.031200, 0.031216, 0.031233, 0.031250, 0.031268, 0.031285, 0.031303, 0.031321, 0.031339, 0.031358, 0.031376, 0.031395, 0.031414, 0.031433, 0.031452, 0.031472, 0.031492, 0.031512, 0.031532, 0.031552, 0.031573, 0.031593, 0.031614, 0.031635, 0.031656, 0.031677, 0.031698, 0.031720, 0.031741, 0.031763, 0.031785, 0.031806, 0.031828, 0.031851, 0.031873, 0.031895, 0.031918, 0.031940, 0.031963, 0.031986, 0.032009, 0.032032, 0.032055, 0.032078, 0.032101, 0.032124, 0.032147, 0.032171, 0.032194, 0.032218, 0.032241, 0.032265, 0.032289, 0.032312, 0.032336, 0.032360, 0.032384, 0.032408, 0.032431, 0.032455, 0.032479, 0.032503, 0.032527, 0.032551, 0.032575, 0.032600, 0.032624, 0.032648, 0.032672, 0.032696, 0.032720, 0.032744, 0.032768, 0.032792, 0.032816, 0.032840, 0.032864, 0.032888, 0.032912, 0.032936, 0.032960, 0.032983, 0.033007, 0.033031, 0.033055, 0.033079, 0.033103, 0.033126, 0.033150, 0.033174, 0.033197, 0.033221, 0.033244, 0.033268, 0.033291, 0.033315, 0.033338, 0.033361, 0.033385, 0.033408, 0.033431, 0.033454, 0.033477, 0.033500, 0.033523, 0.033546, 0.033569, 0.033592, 0.033615, 0.033637, 0.033660, 0.033683, 0.033706, 0.033729, 0.033751, 0.033774, 0.033796, 0.033819, 0.033841, 0.033863, 0.033885, 0.033907, 0.033930, 0.033952, 0.033974, 0.033996, 0.034018, 0.034040, 0.034062, 0.034084, 0.034106, 0.034128, 0.034149, 0.034171, 0.034193, 0.034215, 0.034236, 0.034258, 0.034280, 0.034301, 0.034323, 0.034344, 0.034366, 0.034387, 0.034409, 0.034430, 0.034452, 0.034473, 0.034495, 0.034516, 0.034537, 0.034559, 0.034580, 0.034602, 0.034623, 0.034644, 0.034666, 0.034687, 0.034708, 0.034730, 0.034751, 0.034773, 0.034794, 0.034816, 0.034837, 0.034859, 0.034881, 0.034902, 0.034924, 0.034946, 0.034968, 0.034990, 0.035012, 0.035034, 0.035056, 0.035078, 0.035100, 0.035122, 0.035145, 0.035167, 0.035190, 0.035212, 0.035235, 0.035258, 0.035281, 0.035304, 0.035327, 0.035350, 0.035374, 0.035397, 0.035421, 0.035444, 0.035468, 0.035492, 0.035516, 0.035541, 0.035565, 0.035590, 0.035615, 0.035640, 0.035665, 0.035690, 0.035715, 0.035741, 0.035767, 0.035793, 0.035819, 0.035846, 0.035872, 0.035899, 0.035926, 0.035953, 0.035981, 0.036009, 0.036037, 0.036065, 0.036094, 0.036123, 0.036152, 0.036181, 0.036211, 0.036241, 0.036271, 0.036302, 0.036332, 0.036363, 0.036395, 0.036427, 0.036459, 0.036491, 0.036524, 0.036557, 0.036590, 0.036624, 0.036658, 0.036693, 0.036728, 0.036763, 0.036799, 0.036835, 0.036871, 0.036908, 0.036946, 0.036984, 0.037022, 0.037060, 0.037100, 0.037139, 0.037179, 0.037220, 0.037260, 0.037302, 0.037344, 0.037386, 0.037429, 0.037472, 0.037516, 0.037561, 0.037606, 0.037651, 0.037697, 0.037744, 0.037791, 0.037839, 0.037887, 0.037936, 0.037985, 0.038035, 0.038086, 0.038137, 0.038189, 0.038242, 0.038295, 0.038349, 0.038403, 0.038458, 0.038514, 0.038570, 0.038627, 0.038685, 0.038743, 0.038802, 0.038862, 0.038923, 0.038984, 0.039046, 0.039109, 0.039172, 0.039236, 0.039301, 0.039367, 0.039434, 0.039501, 0.039569, 0.039638, 0.039708, 0.039779, 0.039850, 0.039922, 0.039995, 0.040069, 0.040144, 0.040220, 0.040297, 0.040374, 0.040452, 0.040532, 0.040612, 0.040693, 0.040775, 0.040858, 0.040942, 0.041027, 0.041113, 0.041200, 0.041288, 0.041377, 0.041467, 0.041558, 0.041650, 0.041742, 0.041836, 0.041931, 0.042027, 0.042124, 0.042223, 0.042322, 0.042422, 0.042524, 0.042627, 0.042730, 0.042835, 0.042941, 0.043049, 0.043157, 0.043266, 0.043377, 0.043489, 0.043602, 0.043716, 0.043832, 0.043949, 0.044067, 0.044186, 0.044307, 0.044428, 0.044551, 0.044676, 0.044801, 0.044928, 0.045056, 0.045186, 0.045317, 0.045449, 0.045583, 0.045718, 0.045854, 0.045992, 0.046131, 0.046272, 0.046413, 0.046557, 0.046701, 0.046848, 0.046995, 0.047144, 0.047294, 0.047446, 0.047600, 0.047755, 0.047911, 0.048069, 0.048228, 0.048389, 0.048552, 0.048716, 0.048881, 0.049048, 0.049217, 0.049388, 0.049560, 0.049733, 0.049908, 0.050085, 0.050263, 0.050443, 0.050624, 0.050807, 0.050992, 0.051179, 0.051367, 0.051556, 0.051748, 0.051941, 0.052136, 0.052332, 0.052531, 0.052731, 0.052932, 0.053136, 0.053341, 0.053547, 0.053756, 0.053966, 0.054178, 0.054392, 0.054607, 0.054824, 0.055043, 0.055264, 0.055487, 0.055711, 0.055937, 0.056165, 0.056395, 0.056627, 0.056860, 0.057095, 0.057332, 0.057570, 0.057811, 0.058053, 0.058297, 0.058543, 0.058791, 0.059040, 0.059292, 0.059545, 0.059800, 0.060057, 0.060315, 0.060576, 0.060838, 0.061102, 0.061368, 0.061635, 0.061905, 0.062176, 0.062449, 0.062724, 0.063000, 0.063279, 0.063559, 0.063841, 0.064125, 0.064410, 0.064698, 0.064987, 0.065278, 0.065570, 0.065865, 0.066161, 0.066459, 0.066758, 0.067059, 0.067362, 0.067667, 0.067973, 0.068281, 0.068591, 0.068903, 0.069216, 0.069530, 0.069847, 0.070165, 0.070484, 0.070806, 0.071129, 0.071453, 0.071779, 0.072107, 0.072436, 0.072767, 0.073100, 0.073434, 0.073769, 0.074106, 0.074445, 0.074785, 0.075126, 0.075469, 0.075813, 0.076159, 0.076506, 0.076854, 0.077204, 0.077556, 0.077908, 0.078262, 0.078618, 0.078974, 0.079332, 0.079691, 0.080052, 0.080414, 0.080777, 0.081141, 0.081506, 0.081873, 0.082241, 0.082609, 0.082979, 0.083350, 0.083722, 0.084096, 0.084470, 0.084845, 0.085221, 0.085598, 0.085977, 0.086356, 0.086736, 0.087117, 0.087498, 0.087881, 0.088265, 0.088649, 0.089034, 0.089420, 0.089807, 0.090195, 0.090583, 0.090972, 0.091362, 0.091752, 0.092143, 0.092534, 0.092927, 0.093320, 0.093713, 0.094107, 0.094501, 0.094896, 0.095291, 0.095687, 0.096083, 0.096480, 0.096877, 0.097274, 0.097672, 0.098070, 0.098468, 0.098867, 0.099266, 0.099665, 0.100064, 0.100463, 0.100863, 0.101263, 0.101662, 0.102062, 0.102462, 0.102862, 0.103262, 0.103663, 0.104063, 0.104463, 0.104863, 0.105263, 0.105663, 0.106063, 0.106463, 0.106862, 0.107262, 0.107661, 0.108060, 0.108458, 0.108857, 0.109255, 0.109653, 0.110050, 0.110447, 0.110844, 0.111240, 0.111636, 0.112032, 0.112427, 0.112822, 0.113216, 0.113609, 0.114002, 0.114395, 0.114787, 0.115179, 0.115569, 0.115960, 0.116349, 0.116738, 0.117126, 0.117513, 0.117900, 0.118286, 0.118672, 0.119056, 0.119439, 0.119822, 0.120204, 0.120585, 0.120965, 0.121345, 0.121723, 0.122100, 0.122477, 0.122852, 0.123227, 0.123601, 0.123973, 0.124344, 0.124715, 0.125084, 0.125453, 0.125820, 0.126186, 0.126551, 0.126914, 0.127277, 0.127638, 0.127998, 0.128357, 0.128715, 0.129071, 0.129426, 0.129780, 0.130132, 0.130483, 0.130833, 0.131181, 0.131528, 0.131874, 0.132218, 0.132561, 0.132902, 0.133242, 0.133580, 0.133917, 0.134252, 0.134586, 0.134919, 0.135249, 0.135579, 0.135906, 0.136232, 0.136556, 0.136879, 0.137200, 0.137520, 0.137837, 0.138154, 0.138468, 0.138781, 0.139092, 0.139401, 0.139708, 0.140014, 0.140318, 0.140620, 0.140920, 0.141219, 0.141515, 0.141810, 0.142103, 0.142394, 0.142683, 0.142971, 0.143256, 0.143539, 0.143820, 0.144100, 0.144377, 0.144652, 0.144926, 0.145198, 0.145467, 0.145734, 0.146000, 0.146263, 0.146524, 0.146784, 0.147041, 0.147296, 0.147549, 0.147800, 0.148049, 0.148295, 0.148540, 0.148782, 0.149022, 0.149260, 0.149495, 0.149729, 0.149960, 0.150189, 0.150415, 0.150640, 0.150862, 0.151082, 0.151300, 0.151515, 0.151729, 0.151940, 0.152148, 0.152355, 0.152559, 0.152760, 0.152960, 0.153157, 0.153351, 0.153544, 0.153733, 0.153921, 0.154106, 0.154289, 0.154470, 0.154648, 0.154823, 0.154997, 0.155167, 0.155336, 0.155502, 0.155666, 0.155827, 0.155986, 0.156142, 0.156296, 0.156448, 0.156597, 0.156743, 0.156888, 0.157029, 0.157168, 0.157305, 0.157439, 0.157571, 0.157700, 0.157827, 0.157951, 0.158073, 0.158193, 0.158310, 0.158424, 0.158536, 0.158646, 0.158753, 0.158857, 0.158959, 0.159059, 0.159156, 0.159251, 0.159343, 0.159432, 0.159520, 0.159604, 0.159687, 0.159766, 0.159844, 0.159919, 0.159991, 0.160061, 0.160129, 0.160194, 0.160256, 0.160316, 0.160374, 0.160429, 0.160482, 0.160532, 0.160580, 0.160625, 0.160669, 0.160709, 0.160748, 0.160783, 0.160817, 0.160848, 0.160877, 0.160903, 0.160927, 0.160948, 0.160968, 0.160984, 0.160999, 0.161011, 0.161021, 0.161028, 0.161033, 0.161036, 0.161037, 0.161035, 0.161031, 0.161025, 0.161016, 0.161006, 0.160993, 0.160977, 0.160960, 0.160940, 0.160918, 0.160894, 0.160868, 0.160840, 0.160809, 0.160777, 0.160742, 0.160705, 0.160666, 0.160624, 0.160581, 0.160536, 0.160488, 0.160439, 0.160387, 0.160334, 0.160278, 0.160221, 0.160162, 0.160100, 0.160037, 0.159972, 0.159904, 0.159835, 0.159764, 0.159691, 0.159616, 0.159539, 0.159461, 0.159381, 0.159298, 0.159214, 0.159128, 0.159041, 0.158951, 0.158860, 0.158768, 0.158673, 0.158577, 0.158479, 0.158380, 0.158279, 0.158176, 0.158072, 0.157966, 0.157858, 0.157749, 0.157638, 0.157526, 0.157412, 0.157297, 0.157180, 0.157062, 0.156942, 0.156821, 0.156699, 0.156575, 0.156450, 0.156323, 0.156195, 0.156066, 0.155935, 0.155803, 0.155670, 0.155535, 0.155400, 0.155263, 0.155124, 0.154985, 0.154844, 0.154703, 0.154560, 0.154416, 0.154271, 0.154124, 0.153977, 0.153829, 0.153680, 0.153529, 0.153378, 0.153226, 0.153072, 0.152918, 0.152763, 0.152607, 0.152450, 0.152292, 0.152133, 0.151973, 0.151813, 0.151651, 0.151489, 0.151326, 0.151163, 0.150998, 0.150833, 0.150667, 0.150501, 0.150333, 0.150165, 0.149997, 0.149827, 0.149657, 0.149487, 0.149316, 0.149144, 0.148972, 0.148799, 0.148626, 0.148452, 0.148277, 0.148102, 0.147927, 0.147751, 0.147575, 0.147398, 0.147221, 0.147044, 0.146866, 0.146688, 0.146509, 0.146330, 0.146151, 0.145971, 0.145791, 0.145611, 0.145430, 0.145250, 0.145069, 0.144887, 0.144706, 0.144524, 0.144342, 0.144161, 0.143978, 0.143796, 0.143614, 0.143431, 0.143248, 0.143065, 0.142882, 0.142699, 0.142516, 0.142333, 0.142150, 0.141967, 0.141784, 0.141600, 0.141417, 0.141234, 0.141050, 0.140867, 0.140684, 0.140501, 0.140318, 0.140135, 0.139951, 0.139769, 0.139586, 0.139403, 0.139221, 0.139038, 0.138856, 0.138674, 0.138492, 0.138310, 0.138129, 0.137947, 0.137766, 0.137585, 0.137404, 0.137223, 0.137042, 0.136862, 0.136682, 0.136502, 0.136323, 0.136143, 0.135964, 0.135786, 0.135607, 0.135429, 0.135251, 0.135073, 0.134896, 0.134719, 0.134542, 0.134366, 0.134190, 0.134014, 0.133839, 0.133664, 0.133489, 0.133314, 0.133140, 0.132966, 0.132793, 0.132620, 0.132447, 0.132275, 0.132103, 0.131932, 0.131761, 0.131590, 0.131420, 0.131250, 0.131080, 0.130911, 0.130742, 0.130574, 0.130406, 0.130239, 0.130072, 0.129905, 0.129739, 0.129573, 0.129408, 0.129243, 0.129079, 0.128915, 0.128751, 0.128588, 0.128426, 0.128264, 0.128102, 0.127941, 0.127780, 0.127620, 0.127460, 0.127300, 0.127142, 0.126983, 0.126825, 0.126668, 0.126511, 0.126354, 0.126198, 0.126043, 0.125888, 0.125733, 0.125579, 0.125426, 0.125272, 0.125120, 0.124968, 0.124816, 0.124665, 0.124514, 0.124364, 0.124215, 0.124066, 0.123917, 0.123769, 0.123621, 0.123474, 0.123327, 0.123181, 0.123036, 0.122890, 0.122746, 0.122602, 0.122458, 0.122315, 0.122172, 0.122030, 0.121888, 0.121747, 0.121607, 0.121467, 0.121327, 0.121188, 0.121050, 0.120912, 0.120774, 0.120637, 0.120501, 0.120365, 0.120229, 0.120094, 0.119960, 0.119826, 0.119692, 0.119559, 0.119427, 0.119295, 0.119164, 0.119033, 0.118902, 0.118772, 0.118643, 0.118514, 0.118386, 0.118258, 0.118131, 0.118004, 0.117878, 0.117752, 0.117627, 0.117502, 0.117377, 0.117254, 0.117130, 0.117008, 0.116885, 0.116764, 0.116642, 0.116521, 0.116401, 0.116281, 0.116162, 0.116043, 0.115925, 0.115807, 0.115690, 0.115573, 0.115456, 0.115341, 0.115225, 0.115110, 0.114996, 0.114882, 0.114768, 0.114655, 0.114543, 0.114431, 0.114320, 0.114208, 0.114098, 0.113988, 0.113878, 0.113769, 0.113660, 0.113552, 0.113444, 0.113337, 0.113230, 0.113123, 0.113017, 0.112912, 0.112807, 0.112702, 0.112598, 0.112494, 0.112391, 0.112288, 0.112186, 0.112084, 0.111983, 0.111882, 0.111781, 0.111681, 0.111581, 0.111481, 0.111382, 0.111284, 0.111186, 0.111088, 0.110991, 0.110894, 0.110797, 0.110701, 0.110606, 0.110510, 0.110415, 0.110321, 0.110227, 0.110133, 0.110039, 0.109946, 0.109853, 0.109761, 0.109669, 0.109577, 0.109486, 0.109395, 0.109305, 0.109215, 0.109125, 0.109036, 0.108947, 0.108858, 0.108770, 0.108682, 0.108594, 0.108506, 0.108419, 0.108333, 0.108246, 0.108160, 0.108074, 0.107989, 0.107903, 0.107819, 0.107734, 0.107650, 0.107566, 0.107482, 0.107399, 0.107316, 0.107233, 0.107151, 0.107069, 0.106987, 0.106905, 0.106824, 0.106743, 0.106662, 0.106581, 0.106501, 0.106421, 0.106341, 0.106262, 0.106182, 0.106103, 0.106024, 0.105946, 0.105867, 0.105789, 0.105711, 0.105633, 0.105556, 0.105479, 0.105402, 0.105325, 0.105248, 0.105172, 0.105096, 0.105020, 0.104944, 0.104869, 0.104794, 0.104719, 0.104644, 0.104569, 0.104495, 0.104421, 0.104346, 0.104273, 0.104199, 0.104125, 0.104052, 0.103979, 0.103906, 0.103833, 0.103760, 0.103688, 0.103616, 0.103544, 0.103472, 0.103400, 0.103328, 0.103257, 0.103186, 0.103115, 0.103044, 0.102973, 0.102903, 0.102832, 0.102762, 0.102692, 0.102622, 0.102552, 0.102482, 0.102413, 0.102343, 0.102274, 0.102205, 0.102136, 0.102068, 0.101999, 0.101931, 0.101862, 0.101794, 0.101726, 0.101658, 0.101590, 0.101523, 0.101455, 0.101388, 0.101320, 0.101253, 0.101186, 0.101119, 0.101053, 0.100986, 0.100920, 0.100853, 0.100787, 0.100721, 0.100655, 0.100589, 0.100524, 0.100458, 0.100393, 0.100328, 0.100262, 0.100197, 0.100132, 0.100068, 0.100003, 0.099939, 0.099874, 0.099810, 0.099746, 0.099682, 0.099618, 0.099554, 0.099491, 0.099427, 0.099364, 0.099301, 0.099238, 0.099175, 0.099112, 0.099049, 0.098987, 0.098925, 0.098862, 0.098800, 0.098738, 0.098676, 0.098615, 0.098553, 0.098492, 0.098430, 0.098369, 0.098308, 0.098247, 0.098186, 0.098126, 0.098066, 0.098005, 0.097945, 0.097885, 0.097825, 0.097765, 0.097706, 0.097646, 0.097587, 0.097528, 0.097469, 0.097410, 0.097352, 0.097293, 0.097235, 0.097176, 0.097118, 0.097061, 0.097003, 0.096946, 0.096889, 0.096831, 0.096775, 0.096718, 0.096661, 0.096605, 0.096548, 0.096492, 0.096436, 0.096380, 0.096324, 0.096269, 0.096214, 0.096159, 0.096104, 0.096049, 0.095995, 0.095941, 0.095887, 0.095833, 0.095780, 0.095726, 0.095673, 0.095620, 0.095567, 0.095514, 0.095462, 0.095409, 0.095357, 0.095305, 0.095253, 0.095202, 0.095151, 0.095100, 0.095049, 0.094998, 0.094948, 0.094897, 0.094847, 0.094798, 0.094748, 0.094699, 0.094649, 0.094600, 0.094552, 0.094503, 0.094455, 0.094407, 0.094359, 0.094311, 0.094264, 0.094216, 0.094169, 0.094122, 0.094076, 0.094029, 0.093983, 0.093937, 0.093891, 0.093845, 0.093800, 0.093755, 0.093710, 0.093665, 0.093621, 0.093576, 0.093532, 0.093488, 0.093444, 0.093400, 0.093356, 0.093313, 0.093270, 0.093227, 0.093184, 0.093142, 0.093099, 0.093057, 0.093015, 0.092973, 0.092932, 0.092890, 0.092849, 0.092807, 0.092766, 0.092725, 0.092685, 0.092644, 0.092603, 0.092563, 0.092523, 0.092483, 0.092443, 0.092403, 0.092364, 0.092324, 0.092285, 0.092245, 0.092206, 0.092167, 0.092128, 0.092089, 0.092051, 0.092012, 0.091973, 0.091935, 0.091897, 0.091858, 0.091820, 0.091782, 0.091744, 0.091706, 0.091668, 0.091631, 0.091593, 0.091555, 0.091518, 0.091480, 0.091443, 0.091405, 0.091368, 0.091330, 0.091293, 0.091256, 0.091219, 0.091182, 0.091145, 0.091108, 0.091070, 0.091033, 0.090996, 0.090959, 0.090922, 0.090885, 0.090848, 0.090811, 0.090774, 0.090737, 0.090700, 0.090663, 0.090626, 0.090589, 0.090552, 0.090515, 0.090478, 0.090441, 0.090404, 0.090367, 0.090330, 0.090293, 0.090256, 0.090219, 0.090181, 0.090144, 0.090107, 0.090070, 0.090033, 0.089995, 0.089958, 0.089920, 0.089883, 0.089846, 0.089808, 0.089770, 0.089733, 0.089695, 0.089658, 0.089620, 0.089583, 0.089545, 0.089507, 0.089469, 0.089431, 0.089394, 0.089356, 0.089318, 0.089280, 0.089241, 0.089203, 0.089165, 0.089127, 0.089089, 0.089051, 0.089013, 0.088974, 0.088936, 0.088898, 0.088860, 0.088821, 0.088783, 0.088744, 0.088706, 0.088667, 0.088629, 0.088590, 0.088551, 0.088513, 0.088474, 0.088436, 0.088397, 0.088358, 0.088320, 0.088281, 0.088242, 0.088203, 0.088165, 0.088126, 0.088087, 0.088048, 0.088009, 0.087971, 0.087932, 0.087893, 0.087854, 0.087815, 0.087777, 0.087738, 0.087699, 0.087660, 0.087621, 0.087583, 0.087544, 0.087506, 0.087467, 0.087429, 0.087390, 0.087351, 0.087313, 0.087274, 0.087236, 0.087198, 0.087159, 0.087121, 0.087082, 0.087044, 0.087006, 0.086967, 0.086929, 0.086890, 0.086852, 0.086814, 0.086776, 0.086738, 0.086700, 0.086662, 0.086624, 0.086586, 0.086549, 0.086511, 0.086473, 0.086435, 0.086397, 0.086360, 0.086322, 0.086284, 0.086247, 0.086209, 0.086172, 0.086135, 0.086097, 0.086060, 0.086023, 0.085986, 0.085949, 0.085912, 0.085875, 0.085838, 0.085801, 0.085764, 0.085727, 0.085691, 0.085654, 0.085617, 0.085581, 0.085544, 0.085508, 0.085471, 0.085435, 0.085399, 0.085363, 0.085326, 0.085290, 0.085254, 0.085218, 0.085182, 0.085146, 0.085110, 0.085074, 0.085038, 0.085002, 0.084966, 0.084931, 0.084895, 0.084859, 0.084824, 0.084788, 0.084752, 0.084717, 0.084681, 0.084646, 0.084610, 0.084575, 0.084539, 0.084504, 0.084469, 0.084433, 0.084398, 0.084363, 0.084328, 0.084292, 0.084257, 0.084222, 0.084187, 0.084152, 0.084116, 0.084081, 0.084046, 0.084011, 0.083976, 0.083941, 0.083905, 0.083870, 0.083835, 0.083800, 0.083765, 0.083729, 0.083694, 0.083659, 0.083624, 0.083589, 0.083554, 0.083519, 0.083483, 0.083448, 0.083413, 0.083378, 0.083343, 0.083307, 0.083272, 0.083237, 0.083202, 0.083166, 0.083131, 0.083096, 0.083061, 0.083025, 0.082990, 0.082954, 0.082919, 0.082883, 0.082847, 0.082812, 0.082776, 0.082740, 0.082705, 0.082669, 0.082633, 0.082597, 0.082561, 0.082526, 0.082490, 0.082454, 0.082418, 0.082382, 0.082346, 0.082310, 0.082273, 0.082237, 0.082201, 0.082165, 0.082128, 0.082092, 0.082056, 0.082019, 0.081983, 0.081946, 0.081910, 0.081873, 0.081837, 0.081800, 0.081763, 0.081726, 0.081689, 0.081653, 0.081616, 0.081579, 0.081542, 0.081505, 0.081468, 0.081431, 0.081393, 0.081356, 0.081319, 0.081282, 0.081244, 0.081207, 0.081169, 0.081132, 0.081095, 0.081057, 0.081020, 0.080982, 0.080944, 0.080907, 0.080869, 0.080831, 0.080793, 0.080755, 0.080717, 0.080679, 0.080641, 0.080603, 0.080565, 0.080527, 0.080489, 0.080451, 0.080413, 0.080375, 0.080337, 0.080299, 0.080261, 0.080223, 0.080185, 0.080146, 0.080108, 0.080070, 0.080032, 0.079993, 0.079955, 0.079917, 0.079878, 0.079840, 0.079802, 0.079763, 0.079725, 0.079687, 0.079649, 0.079610, 0.079572, 0.079533, 0.079495, 0.079457, 0.079418, 0.079380, 0.079342, 0.079303, 0.079265, 0.079227, 0.079189, 0.079151, 0.079113, 0.079075, 0.079037, 0.078999, 0.078961, 0.078923, 0.078885, 0.078847, 0.078809, 0.078771, 0.078733, 0.078695, 0.078657, 0.078620, 0.078582, 0.078544, 0.078507, 0.078470, 0.078432, 0.078395, 0.078358, 0.078321, 0.078284, 0.078247, 0.078210, 0.078174, 0.078137, 0.078101, 0.078064, 0.078028, 0.077992, 0.077956, 0.077920, 0.077884, 0.077848, 0.077813, 0.077777, 0.077742, 0.077706, 0.077671, 0.077636, 0.077601, 0.077567, 0.077532, 0.077497, 0.077463, 0.077429, 0.077395, 0.077361, 0.077328, 0.077294, 0.077261, 0.077228, 0.077195, 0.077162, 0.077130, 0.077098, 0.077066, 0.077034, 0.077002, 0.076970, 0.076939, 0.076908, 0.076877, 0.076846, 0.076816, 0.076785, 0.076755, 0.076726, 0.076696, 0.076667, 0.076638, 0.076609, 0.076580, 0.076552, 0.076524, 0.076496, 0.076469, 0.076441, 0.076414, 0.076388, 0.076361, 0.076335, 0.076309, 0.076283, 0.076258, 0.076233, 0.076208, 0.076183, 0.076159, 0.076135, 0.076111, 0.076088, 0.076065, 0.076042, 0.076020, 0.075997, 0.075975, 0.075954, 0.075932, 0.075911, 0.075891, 0.075870, 0.075850, 0.075830, 0.075811, 0.075792, 0.075773, 0.075754, 0.075736, 0.075718, 0.075700, 0.075683, 0.075666, 0.075649, 0.075633, 0.075617, 0.075601, 0.075585, 0.075570, 0.075555, 0.075541, 0.075526, 0.075512, 0.075498, 0.075485, 0.075472, 0.075459, 0.075447, 0.075434, 0.075422, 0.075411, 0.075399, 0.075388, 0.075378, 0.075367, 0.075357, 0.075347, 0.075337, 0.075328, 0.075319, 0.075310, 0.075301, 0.075293, 0.075285, 0.075277, 0.075270, 0.075262, 0.075255, 0.075249, 0.075242, 0.075236, 0.075229, 0.075224, 0.075218, 0.075212, 0.075207, 0.075202, 0.075197, 0.075193, 0.075188, 0.075184, 0.075180, 0.075176, 0.075173, 0.075169, 0.075166, 0.075163, 0.075160, 0.075157, 0.075154, 0.075152, 0.075149, 0.075147, 0.075145, 0.075143, 0.075142, 0.075140, 0.075139, 0.075137, 0.075136, 0.075135, 0.075134, 0.075133, 0.075132, 0.075131, 0.075130, 0.075130, 0.075129, 0.075129, 0.075128, 0.075128, 0.075128, 0.075127, 0.075127, 0.075127, 0.075127, 0.075126, 0.075126, 0.075126, 0.075126, 0.075126, 0.075126, 0.075126, 0.075126, 0.075126, 0.075126, 0.075126, 0.075125, 0.075125, 0.075125, 0.075125, 0.075125, 0.075124, 0.075124, 0.075124, 0.075123, 0.075122, 0.075122, 0.075121, 0.075120, 0.075119, 0.075118, 0.075117, 0.075116, 0.075115, 0.075114, 0.075112, 0.075111, 0.075109, 0.075107, 0.075106, 0.075104, 0.075102, 0.075100, 0.075097, 0.075095, 0.075092, 0.075090, 0.075087, 0.075084, 0.075080, 0.075077, 0.075074, 0.075070, 0.075066, 0.075062, 0.075058, 0.075054, 0.075049, 0.075045, 0.075040, 0.075035, 0.075030, 0.075024, 0.075019, 0.075013, 0.075007, 0.075001, 0.074995, 0.074988, 0.074981, 0.074974, 0.074967, 0.074960, 0.074952, 0.074945, 0.074937, 0.074928, 0.074920, 0.074911, 0.074903, 0.074894, 0.074884, 0.074875, 0.074865, 0.074856, 0.074846, 0.074835, 0.074825, 0.074814, 0.074803, 0.074792, 0.074781, 0.074769, 0.074757, 0.074746, 0.074733, 0.074721, 0.074708, 0.074695, 0.074682, 0.074669, 0.074655, 0.074642, 0.074628, 0.074614, 0.074600, 0.074585, 0.074570, 0.074555, 0.074540, 0.074525, 0.074510, 0.074494, 0.074478, 0.074462, 0.074446, 0.074429, 0.074413, 0.074396, 0.074379, 0.074362, 0.074345, 0.074327, 0.074310, 0.074292, 0.074274, 0.074256, 0.074237, 0.074219, 0.074200, 0.074181, 0.074162, 0.074143, 0.074124, 0.074105, 0.074085, 0.074066, 0.074046, 0.074026, 0.074006, 0.073986, 0.073966, 0.073945, 0.073925, 0.073904, 0.073884, 0.073863, 0.073842, 0.073821, 0.073800, 0.073779, 0.073758, 0.073737, 0.073716, 0.073694, 0.073673, 0.073651, 0.073630, 0.073608, 0.073586, 0.073564, 0.073542, 0.073520, 0.073498, 0.073476, 0.073454, 0.073432, 0.073410, 0.073388, 0.073366, 0.073343, 0.073321, 0.073299, 0.073277, 0.073254, 0.073232, 0.073209, 0.073187, 0.073164, 0.073142, 0.073119, 0.073097, 0.073075, 0.073052, 0.073030, 0.073007, 0.072985, 0.072963, 0.072940, 0.072918, 0.072896, 0.072873, 0.072851, 0.072829, 0.072807, 0.072784, 0.072762, 0.072740, 0.072718, 0.072696, 0.072673, 0.072651, 0.072629, 0.072607, 0.072585, 0.072563, 0.072540, 0.072518, 0.072496, 0.072474, 0.072452, 0.072430, 0.072408, 0.072386, 0.072364, 0.072343, 0.072321, 0.072299, 0.072277, 0.072255, 0.072233, 0.072211, 0.072189, 0.072167, 0.072145, 0.072123, 0.072101, 0.072079, 0.072057, 0.072035, 0.072013, 0.071991, 0.071969, 0.071947, 0.071925, 0.071903, 0.071881, 0.071859, 0.071837, 0.071815, 0.071793, 0.071770, 0.071748, 0.071726, 0.071703, 0.071681, 0.071658, 0.071636, 0.071613, 0.071590, 0.071567, 0.071545, 0.071522, 0.071498, 0.071475, 0.071452, 0.071429, 0.071406, 0.071382, 0.071359, 0.071335, 0.071311, 0.071287, 0.071263, 0.071239, 0.071215, 0.071191, 0.071167, 0.071142, 0.071117, 0.071093, 0.071068, 0.071042, 0.071017, 0.070992, 0.070966, 0.070940, 0.070915, 0.070889, 0.070862, 0.070836, 0.070809, 0.070783, 0.070756, 0.070729, 0.070702, 0.070674, 0.070647, 0.070619, 0.070591, 0.070563, 0.070535, 0.070506, 0.070478, 0.070449, 0.070420, 0.070391, 0.070362, 0.070332, 0.070303, 0.070273, 0.070243, 0.070212, 0.070182, 0.070151, 0.070120, 0.070089, 0.070058, 0.070027, 0.069995, 0.069963, 0.069931, 0.069899, 0.069867, 0.069835, 0.069802, 0.069769, 0.069736, 0.069703, 0.069670, 0.069636, 0.069603, 0.069569, 0.069535, 0.069501, 0.069467, 0.069432, 0.069398, 0.069363, 0.069328, 0.069293, 0.069258, 0.069222, 0.069187, 0.069151, 0.069116, 0.069080, 0.069044, 0.069008, 0.068972, 0.068936, 0.068899, 0.068863, 0.068826, 0.068789, 0.068753, 0.068716, 0.068679, 0.068642, 0.068605, 0.068567, 0.068530, 0.068493, 0.068455, 0.068418, 0.068380, 0.068343, 0.068305, 0.068268, 0.068230, 0.068193, 0.068155, 0.068117, 0.068080, 0.068042, 0.068004, 0.067966, 0.067929, 0.067891, 0.067853, 0.067816, 0.067778, 0.067740, 0.067703, 0.067665, 0.067628, 0.067590, 0.067553, 0.067516, 0.067478, 0.067441, 0.067404, 0.067367, 0.067329, 0.067292, 0.067255, 0.067219, 0.067182, 0.067145, 0.067109, 0.067073, 0.067036, 0.067000, 0.066964, 0.066928, 0.066892, 0.066857, 0.066821, 0.066785, 0.066750, 0.066715, 0.066680, 0.066645, 0.066610, 0.066576, 0.066541, 0.066507, 0.066473, 0.066439, 0.066405, 0.066371, 0.066338, 0.066305, 0.066272, 0.066239, 0.066206, 0.066173, 0.066141, 0.066109, 0.066077, 0.066045, 0.066014, 0.065982, 0.065951, 0.065920, 0.065890, 0.065859, 0.065829, 0.065799, 0.065769, 0.065739, 0.065710, 0.065681, 0.065652, 0.065623, 0.065594, 0.065566, 0.065538, 0.065510, 0.065482, 0.065455, 0.065427, 0.065400, 0.065374, 0.065347, 0.065321, 0.065295, 0.065269, 0.065244, 0.065218, 0.065193, 0.065169, 0.065144, 0.065120, 0.065096, 0.065072, 0.065048, 0.065025, 0.065002, 0.064979, 0.064956, 0.064934, 0.064912, 0.064890, 0.064868, 0.064847, 0.064825, 0.064804, 0.064784, 0.064763, 0.064743, 0.064723, 0.064703, 0.064684, 0.064664, 0.064645, 0.064627, 0.064608, 0.064590, 0.064571, 0.064554, 0.064536, 0.064518, 0.064501, 0.064484, 0.064468, 0.064451, 0.064435, 0.064418, 0.064402, 0.064387, 0.064371, 0.064356, 0.064341, 0.064326, 0.064311, 0.064297, 0.064282, 0.064268, 0.064254, 0.064241, 0.064227, 0.064214, 0.064201, 0.064188, 0.064175, 0.064162, 0.064150, 0.064137, 0.064125, 0.064113, 0.064101, 0.064090, 0.064078, 0.064067, 0.064056, 0.064045, 0.064034, 0.064023, 0.064013, 0.064002, 0.063992, 0.063982, 0.063972, 0.063962, 0.063952, 0.063943, 0.063933, 0.063924, 0.063915, 0.063905, 0.063896, 0.063888, 0.063879, 0.063870, 0.063861, 0.063853, 0.063844, 0.063836, 0.063828, 0.063820, 0.063811, 0.063803, 0.063795, 0.063787, 0.063780, 0.063772, 0.063764, 0.063756, 0.063749, 0.063741, 0.063734, 0.063726, 0.063719, 0.063711, 0.063704, 0.063696, 0.063689, 0.063682, 0.063674, 0.063667, 0.063660, 0.063652, 0.063645, 0.063638, 0.063631, 0.063623, 0.063616, 0.063609, 0.063601, 0.063594, 0.063587, 0.063579, 0.063572, 0.063565, 0.063557, 0.063550, 0.063542, 0.063534, 0.063527, 0.063519, 0.063511, 0.063504, 0.063496, 0.063488, 0.063480, 0.063472, 0.063464, 0.063455, 0.063447, 0.063439, 0.063431, 0.063422, 0.063414, 0.063405, 0.063397, 0.063388, 0.063379, 0.063370, 0.063362, 0.063353, 0.063343, 0.063334, 0.063325, 0.063316, 0.063306, 0.063297, 0.063287, 0.063278, 0.063268, 0.063258, 0.063248, 0.063238, 0.063227, 0.063217, 0.063206, 0.063196, 0.063185, 0.063175, 0.063164, 0.063153, 0.063142, 0.063130, 0.063119, 0.063108, 0.063096, 0.063085, 0.063073, 0.063061, 0.063049, 0.063037, 0.063025, 0.063012, 0.063000, 0.062988, 0.062975, 0.062963, 0.062950, 0.062937, 0.062924, 0.062911, 0.062898, 0.062885, 0.062871, 0.062858, 0.062844, 0.062831, 0.062817, 0.062804, 0.062790, 0.062776, 0.062762, 0.062748, 0.062733, 0.062719, 0.062705, 0.062691, 0.062676, 0.062662, 0.062647, 0.062632, 0.062618, 0.062603, 0.062588, 0.062573, 0.062558, 0.062543, 0.062527, 0.062512, 0.062497, 0.062482, 0.062466, 0.062451, 0.062436, 0.062420, 0.062405, 0.062389, 0.062374, 0.062358, 0.062343, 0.062327, 0.062312, 0.062296, 0.062281, 0.062265, 0.062250, 0.062234, 0.062219, 0.062203, 0.062187, 0.062172, 0.062156, 0.062141, 0.062126, 0.062110, 0.062095, 0.062079, 0.062064, 0.062049, 0.062034, 0.062019, 0.062004, 0.061989, 0.061974, 0.061959, 0.061944, 0.061929, 0.061914, 0.061900, 0.061885, 0.061871, 0.061856, 0.061842, 0.061828, 0.061814, 0.061800, 0.061786, 0.061772, 0.061759, 0.061745, 0.061732, 0.061718, 0.061705, 0.061692, 0.061679, 0.061667, 0.061654, 0.061641, 0.061629, 0.061617, 0.061605, 0.061593, 0.061581, 0.061569, 0.061558, 0.061546, 0.061535, 0.061524, 0.061513, 0.061502, 0.061492, 0.061481, 0.061471, 0.061461, 0.061451, 0.061441, 0.061432, 0.061423, 0.061413, 0.061404, 0.061396, 0.061387, 0.061379, 0.061370, 0.061362, 0.061355, 0.061347, 0.061340, 0.061332, 0.061325, 0.061318, 0.061312, 0.061305, 0.061299, 0.061292, 0.061286, 0.061281, 0.061275, 0.061270, 0.061264, 0.061259, 0.061255, 0.061250, 0.061245, 0.061241, 0.061237, 0.061233, 0.061229, 0.061226, 0.061223, 0.061220, 0.061217, 0.061214, 0.061211, 0.061209, 0.061207, 0.061204, 0.061203, 0.061201, 0.061199, 0.061198, 0.061197, 0.061196, 0.061195, 0.061194, 0.061194, 0.061193, 0.061193, 0.061193, 0.061193, 0.061193, 0.061193, 0.061194, 0.061194, 0.061195, 0.061196, 0.061197, 0.061198, 0.061200, 0.061201, 0.061203, 0.061204, 0.061206, 0.061208, 0.061210, 0.061212, 0.061214, 0.061217, 0.061219, 0.061221, 0.061224, 0.061227, 0.061229, 0.061232, 0.061235, 0.061238, 0.061241, 0.061244, 0.061247, 0.061250, 0.061253, 0.061256, 0.061259, 0.061263, 0.061266, 0.061269, 0.061273, 0.061276, 0.061280, 0.061283, 0.061286, 0.061290, 0.061293, 0.061297, 0.061300, 0.061303, 0.061307, 0.061310, 0.061313, 0.061317, 0.061320, 0.061323, 0.061326, 0.061329, 0.061333, 0.061336, 0.061339, 0.061341, 0.061344, 0.061347, 0.061349, 0.061352, 0.061354, 0.061356, 0.061359, 0.061361, 0.061363, 0.061365, 0.061366, 0.061368, 0.061370, 0.061371, 0.061372, 0.061374, 0.061375, 0.061375, 0.061376, 0.061377, 0.061377, 0.061377, 0.061378, 0.061378, 0.061377, 0.061377, 0.061376, 0.061376, 0.061375, 0.061374, 0.061372, 0.061371, 0.061369, 0.061367, 0.061365, 0.061363, 0.061361, 0.061358, 0.061355, 0.061352, 0.061349, 0.061345, 0.061341, 0.061337, 0.061333, 0.061329, 0.061324, 0.061319, 0.061314, 0.061308, 0.061303, 0.061297, 0.061291, 0.061284, 0.061278, 0.061271, 0.061264, 0.061256, 0.061249, 0.061241, 0.061233, 0.061225, 0.061216, 0.061207, 0.061198, 0.061189, 0.061179, 0.061169, 0.061159, 0.061149, 0.061138, 0.061128, 0.061116, 0.061105, 0.061093, 0.061082, 0.061069, 0.061057, 0.061044, 0.061032, 0.061018, 0.061005, 0.060991, 0.060978, 0.060964, 0.060949, 0.060935, 0.060920, 0.060905, 0.060890, 0.060875, 0.060859, 0.060843, 0.060827, 0.060811, 0.060794, 0.060777, 0.060760, 0.060743, 0.060726, 0.060708, 0.060691, 0.060673, 0.060655, 0.060637, 0.060618, 0.060599, 0.060581, 0.060562, 0.060543, 0.060523, 0.060504, 0.060484, 0.060465, 0.060445, 0.060425, 0.060404, 0.060384, 0.060363, 0.060343, 0.060322, 0.060301, 0.060280, 0.060259, 0.060238, 0.060216, 0.060195, 0.060173, 0.060152, 0.060130, 0.060108, 0.060086, 0.060064, 0.060042, 0.060020, 0.059998, 0.059976, 0.059954, 0.059932, 0.059909, 0.059887, 0.059865, 0.059842, 0.059820, 0.059798, 0.059775, 0.059753, 0.059730, 0.059708, 0.059685, 0.059663, 0.059641, 0.059618, 0.059596, 0.059574, 0.059551, 0.059529, 0.059507, 0.059485, 0.059463, 0.059441, 0.059419, 0.059397, 0.059375, 0.059353, 0.059331, 0.059310, 0.059288, 0.059267, 0.059245, 0.059224, 0.059203, 0.059181, 0.059160, 0.059139, 0.059118, 0.059098, 0.059077, 0.059057, 0.059036, 0.059016, 0.058996, 0.058976, 0.058956, 0.058936, 0.058916, 0.058896, 0.058877, 0.058857, 0.058838, 0.058819, 0.058800, 0.058781, 0.058763, 0.058744, 0.058726, 0.058708, 0.058690, 0.058672, 0.058655, 0.058637, 0.058620, 0.058602, 0.058585, 0.058568, 0.058551, 0.058535, 0.058518, 0.058502, 0.058485, 0.058469, 0.058453, 0.058437, 0.058422, 0.058406, 0.058391, 0.058376, 0.058361, 0.058346, 0.058331, 0.058317, 0.058302, 0.058288, 0.058274, 0.058260, 0.058246, 0.058232, 0.058219, 0.058206, 0.058192, 0.058179, 0.058166, 0.058153, 0.058141, 0.058128, 0.058115, 0.058103, 0.058091, 0.058079, 0.058067, 0.058055, 0.058043, 0.058032, 0.058020, 0.058009, 0.057997, 0.057986, 0.057975, 0.057964, 0.057953, 0.057942, 0.057932, 0.057921, 0.057910, 0.057900, 0.057889, 0.057879, 0.057869, 0.057859, 0.057849, 0.057838, 0.057829, 0.057819, 0.057809, 0.057799, 0.057789, 0.057780, 0.057770, 0.057760, 0.057751, 0.057741, 0.057732, 0.057722, 0.057713, 0.057703, 0.057694, 0.057684, 0.057675, 0.057665, 0.057656, 0.057646, 0.057637, 0.057627, 0.057618, 0.057608, 0.057599, 0.057589, 0.057580, 0.057570, 0.057561, 0.057551, 0.057541, 0.057532, 0.057522, 0.057512, 0.057502, 0.057493, 0.057483, 0.057473, 0.057463, 0.057453, 0.057442, 0.057432, 0.057422, 0.057412, 0.057401, 0.057391, 0.057380, 0.057370, 0.057359, 0.057348, 0.057337, 0.057327, 0.057316, 0.057305, 0.057294, 0.057283, 0.057271, 0.057260, 0.057248, 0.057237, 0.057225, 0.057213, 0.057201, 0.057189, 0.057177, 0.057165, 0.057152, 0.057140, 0.057128, 0.057115, 0.057102, 0.057089, 0.057076, 0.057063, 0.057050, 0.057037, 0.057023, 0.057010, 0.056996, 0.056982, 0.056968, 0.056954, 0.056940, 0.056926, 0.056911, 0.056897, 0.056883, 0.056868, 0.056853, 0.056838, 0.056823, 0.056808, 0.056793, 0.056778, 0.056762, 0.056747, 0.056731, 0.056716, 0.056700, 0.056684, 0.056668, 0.056652, 0.056636, 0.056620, 0.056603, 0.056587, 0.056570, 0.056554, 0.056537, 0.056521, 0.056504, 0.056487, 0.056470, 0.056453, 0.056436, 0.056419, 0.056401, 0.056384, 0.056367, 0.056349, 0.056332, 0.056314, 0.056297, 0.056280, 0.056262, 0.056244, 0.056226, 0.056209, 0.056191, 0.056173, 0.056156, 0.056138, 0.056120, 0.056102, 0.056085, 0.056067, 0.056049, 0.056031, 0.056013, 0.055995, 0.055977, 0.055960, 0.055942, 0.055924, 0.055906, 0.055889, 0.055871, 0.055854, 0.055836, 0.055819, 0.055801, 0.055784, 0.055766, 0.055749, 0.055732, 0.055714, 0.055697, 0.055680, 0.055663, 0.055646, 0.055629, 0.055612, 0.055596, 0.055579, 0.055562, 0.055546, 0.055529, 0.055513, 0.055497, 0.055481, 0.055465, 0.055449, 0.055433, 0.055417, 0.055401, 0.055386, 0.055370, 0.055355, 0.055340, 0.055324, 0.055309, 0.055294, 0.055280, 0.055265, 0.055250, 0.055236, 0.055221, 0.055207, 0.055193, 0.055179, 0.055165, 0.055152, 0.055138, 0.055124, 0.055111, 0.055098, 0.055085, 0.055072, 0.055059, 0.055046, 0.055034, 0.055021, 0.055009, 0.054997, 0.054985, 0.054973, 0.054961, 0.054949, 0.054938, 0.054926, 0.054915, 0.054904, 0.054893, 0.054882, 0.054871, 0.054860, 0.054850, 0.054839, 0.054829, 0.054818, 0.054808, 0.054798, 0.054788, 0.054778, 0.054769, 0.054759, 0.054749, 0.054740, 0.054731, 0.054721, 0.054712, 0.054703, 0.054694, 0.054685, 0.054676, 0.054667, 0.054659, 0.054650, 0.054642, 0.054633, 0.054625, 0.054617, 0.054608, 0.054600, 0.054592, 0.054584, 0.054576, 0.054568, 0.054560, 0.054552, 0.054544, 0.054537, 0.054529, 0.054521, 0.054513, 0.054506, 0.054498, 0.054491, 0.054483, 0.054476, 0.054468, 0.054461, 0.054453, 0.054446, 0.054439, 0.054431, 0.054424, 0.054416, 0.054409, 0.054402, 0.054395, 0.054387, 0.054380, 0.054372, 0.054365, 0.054358, 0.054350, 0.054343, 0.054336, 0.054329, 0.054321, 0.054314, 0.054306, 0.054299, 0.054291, 0.054284, 0.054276, 0.054268, 0.054261, 0.054253, 0.054246, 0.054238, 0.054231, 0.054223, 0.054216, 0.054208, 0.054200, 0.054193, 0.054185, 0.054177, 0.054170, 0.054162, 0.054154, 0.054147, 0.054139, 0.054131, 0.054123, 0.054116, 0.054108, 0.054100, 0.054092, 0.054085, 0.054077, 0.054069, 0.054061, 0.054053, 0.054046, 0.054038, 0.054030, 0.054022, 0.054015, 0.054007, 0.053999, 0.053992, 0.053984, 0.053976, 0.053969, 0.053961, 0.053954, 0.053946, 0.053938, 0.053931, 0.053923, 0.053916, 0.053909, 0.053901, 0.053894, 0.053887, 0.053880, 0.053873, 0.053866, 0.053859, 0.053852, 0.053845, 0.053838, 0.053832, 0.053825, 0.053818, 0.053812, 0.053805, 0.053799, 0.053792, 0.053786, 0.053780, 0.053774, 0.053768, 0.053762, 0.053756, 0.053750, 0.053745, 0.053739, 0.053734, 0.053728, 0.053723, 0.053718, 0.053713, 0.053708, 0.053704, 0.053699, 0.053694, 0.053690, 0.053685, 0.053681, 0.053677, 0.053673, 0.053669, 0.053665, 0.053661, 0.053658, 0.053654, 0.053651, 0.053648, 0.053645, 0.053642, 0.053639, 0.053636, 0.053633, 0.053631, 0.053629, 0.053626, 0.053624, 0.053622, 0.053621, 0.053619, 0.053617, 0.053616, 0.053615, 0.053614, 0.053613, 0.053612, 0.053611, 0.053610, 0.053610, 0.053609, 0.053609, 0.053609, 0.053609, 0.053609, 0.053609, 0.053609, 0.053610, 0.053610, 0.053611, 0.053612, 0.053613, 0.053614, 0.053615, 0.053616, 0.053618, 0.053619, 0.053621, 0.053623, 0.053625, 0.053627, 0.053629, 0.053631, 0.053633, 0.053635, 0.053638, 0.053640, 0.053643, 0.053646, 0.053648, 0.053651, 0.053654, 0.053657, 0.053660, 0.053664, 0.053667, 0.053670, 0.053674, 0.053678, 0.053681, 0.053685, 0.053689, 0.053693, 0.053696, 0.053700, 0.053704, 0.053709, 0.053713, 0.053717, 0.053721, 0.053725, 0.053730, 0.053734, 0.053739, 0.053743, 0.053748, 0.053752, 0.053757, 0.053762, 0.053766, 0.053771, 0.053776, 0.053781, 0.053786, 0.053790, 0.053795, 0.053800, 0.053805, 0.053810, 0.053815, 0.053819, 0.053824, 0.053829, 0.053834, 0.053839, 0.053844, 0.053849, 0.053853, 0.053858, 0.053863, 0.053868, 0.053873, 0.053878, 0.053882, 0.053887, 0.053892, 0.053897, 0.053901, 0.053906, 0.053910, 0.053915, 0.053919, 0.053924, 0.053928, 0.053932, 0.053937, 0.053941, 0.053945, 0.053949, 0.053954, 0.053958, 0.053962, 0.053966, 0.053970, 0.053973, 0.053977, 0.053981, 0.053984, 0.053988, 0.053991, 0.053995, 0.053998, 0.054002, 0.054005, 0.054008, 0.054011, 0.054014, 0.054017, 0.054020, 0.054023, 0.054025, 0.054028, 0.054030, 0.054033, 0.054035, 0.054037, 0.054039, 0.054041, 0.054043, 0.054045, 0.054047, 0.054048, 0.054050, 0.054051, 0.054052, 0.054054, 0.054055, 0.054056, 0.054057, 0.054057, 0.054058, 0.054058, 0.054058, 0.054059, 0.054059, 0.054059, 0.054059, 0.054059, 0.054058, 0.054058, 0.054058, 0.054057, 0.054056, 0.054055, 0.054054, 0.054053, 0.054052, 0.054051, 0.054050, 0.054048, 0.054047, 0.054045, 0.054043, 0.054041, 0.054039, 0.054037, 0.054035, 0.054032, 0.054030, 0.054027, 0.054024, 0.054022, 0.054019, 0.054016, 0.054012, 0.054009, 0.054006, 0.054002, 0.053999, 0.053995, 0.053991, 0.053988, 0.053984, 0.053980, 0.053975, 0.053971, 0.053967, 0.053962, 0.053958, 0.053953, 0.053948, 0.053944, 0.053939, 0.053934, 0.053928, 0.053923, 0.053918, 0.053913, 0.053907, 0.053902, 0.053896, 0.053891, 0.053885, 0.053879, 0.053874, 0.053868, 0.053862, 0.053856, 0.053850, 0.053844, 0.053838, 0.053831, 0.053825, 0.053819, 0.053813, 0.053806, 0.053800, 0.053793, 0.053787, 0.053781, 0.053774, 0.053767, 0.053761, 0.053754, 0.053747, 0.053740, 0.053734, 0.053727, 0.053720, 0.053713, 0.053706, 0.053699, 0.053692, 0.053686, 0.053679, 0.053672, 0.053665, 0.053658, 0.053651, 0.053645, 0.053638, 0.053631, 0.053624, 0.053617, 0.053611, 0.053604, 0.053597, 0.053591, 0.053584, 0.053577, 0.053571, 0.053564, 0.053558, 0.053551, 0.053544, 0.053538, 0.053531, 0.053525, 0.053519, 0.053512, 0.053506, 0.053500, 0.053494, 0.053488, 0.053482, 0.053476, 0.053470, 0.053464, 0.053458, 0.053453, 0.053447, 0.053441, 0.053435, 0.053430, 0.053424, 0.053419, 0.053414, 0.053408, 0.053403, 0.053398, 0.053392, 0.053387, 0.053382, 0.053377, 0.053373, 0.053368, 0.053363, 0.053358, 0.053354, 0.053349, 0.053344, 0.053340, 0.053336, 0.053331, 0.053327, 0.053322, 0.053318, 0.053314, 0.053310, 0.053306, 0.053302, 0.053298, 0.053294, 0.053290, 0.053287, 0.053283, 0.053279, 0.053276, 0.053272, 0.053268, 0.053265, 0.053261, 0.053258, 0.053255, 0.053251, 0.053248, 0.053245, 0.053242, 0.053239, 0.053235, 0.053232, 0.053230, 0.053227, 0.053224, 0.053221, 0.053218, 0.053215, 0.053212, 0.053209, 0.053206, 0.053203, 0.053200, 0.053198, 0.053195, 0.053192, 0.053189, 0.053186, 0.053183, 0.053180, 0.053178, 0.053175, 0.053172, 0.053169, 0.053166, 0.053163, 0.053161, 0.053158, 0.053155, 0.053152, 0.053149, 0.053146, 0.053143, 0.053139, 0.053136, 0.053133, 0.053130, 0.053126, 0.053123, 0.053120, 0.053116, 0.053113, 0.053109, 0.053105, 0.053102, 0.053098, 0.053094, 0.053090, 0.053086, 0.053082, 0.053078, 0.053074, 0.053070, 0.053066, 0.053061, 0.053057, 0.053052, 0.053048, 0.053043, 0.053038, 0.053034, 0.053029, 0.053024, 0.053019, 0.053013, 0.053008, 0.053003, 0.052997, 0.052992, 0.052986, 0.052981, 0.052975, 0.052969, 0.052963, 0.052957, 0.052951, 0.052945, 0.052939, 0.052932, 0.052926, 0.052919, 0.052912, 0.052906, 0.052899, 0.052892, 0.052885, 0.052878, 0.052870, 0.052863, 0.052856, 0.052848, 0.052840, 0.052833, 0.052825, 0.052817, 0.052809, 0.052801, 0.052793, 0.052785, 0.052777, 0.052768, 0.052760, 0.052751, 0.052743, 0.052734, 0.052725, 0.052716, 0.052708, 0.052698, 0.052689, 0.052680, 0.052671, 0.052661, 0.052652, 0.052643, 0.052633, 0.052624, 0.052614, 0.052605, 0.052595, 0.052585, 0.052575, 0.052565, 0.052555, 0.052545, 0.052535, 0.052525, 0.052514, 0.052504, 0.052494, 0.052483, 0.052473, 0.052463, 0.052452, 0.052442, 0.052431, 0.052420, 0.052410, 0.052399, 0.052388, 0.052378, 0.052367, 0.052356, 0.052345, 0.052334, 0.052323, 0.052313, 0.052302, 0.052291, 0.052280, 0.052269, 0.052258, 0.052247, 0.052237, 0.052226, 0.052215, 0.052204, 0.052193, 0.052182, 0.052171, 0.052160, 0.052149, 0.052138, 0.052127, 0.052115, 0.052105, 0.052094, 0.052083, 0.052072, 0.052061, 0.052050, 0.052039, 0.052028, 0.052017, 0.052006, 0.051995, 0.051984, 0.051973, 0.051963, 0.051952, 0.051941, 0.051931, 0.051920, 0.051909, 0.051898, 0.051888, 0.051877, 0.051866, 0.051856, 0.051845, 0.051835, 0.051824, 0.051813, 0.051803, 0.051792, 0.051782, 0.051772, 0.051761, 0.051751, 0.051741, 0.051730, 0.051720, 0.051710, 0.051700, 0.051690, 0.051680, 0.051670, 0.051660, 0.051650, 0.051640, 0.051630, 0.051620, 0.051610, 0.051600, 0.051590, 0.051580, 0.051570, 0.051560, 0.051551, 0.051541, 0.051531, 0.051521, 0.051512, 0.051502, 0.051493, 0.051483, 0.051473, 0.051464, 0.051454, 0.051445, 0.051435, 0.051426, 0.051417, 0.051407, 0.051398, 0.051389, 0.051379, 0.051370, 0.051361, 0.051352, 0.051343, 0.051334, 0.051325, 0.051316, 0.051307, 0.051297, 0.051288, 0.051280, 0.051271, 0.051262, 0.051253, 0.051244, 0.051235, 0.051227, 0.051218, 0.051209, 0.051200, 0.051192, 0.051183, 0.051174, 0.051166, 0.051157, 0.051148, 0.051140, 0.051131, 0.051122, 0.051114, 0.051105, 0.051097, 0.051088, 0.051080, 0.051071, 0.051063, 0.051054, 0.051046, 0.051038, 0.051029, 0.051021, 0.051013, 0.051004, 0.050996, 0.050988, 0.050980, 0.050971, 0.050963, 0.050955, 0.050947, 0.050938, 0.050930, 0.050922, 0.050914, 0.050906, 0.050897, 0.050889, 0.050881, 0.050873, 0.050865, 0.050857, 0.050849, 0.050841, 0.050833, 0.050825, 0.050817, 0.050809, 0.050801, 0.050793, 0.050785, 0.050778, 0.050770, 0.050762, 0.050754, 0.050746, 0.050738, 0.050731, 0.050723, 0.050715, 0.050707, 0.050700, 0.050692, 0.050685, 0.050677, 0.050670, 0.050662, 0.050655, 0.050647, 0.050640, 0.050633, 0.050625, 0.050618, 0.050610, 0.050603, 0.050596, 0.050588, 0.050581, 0.050574, 0.050567, 0.050560, 0.050553, 0.050546, 0.050539, 0.050533, 0.050526, 0.050519, 0.050512, 0.050506, 0.050499, 0.050493, 0.050486, 0.050480, 0.050474, 0.050468, 0.050461, 0.050455, 0.050449, 0.050443, 0.050437, 0.050432, 0.050426, 0.050420, 0.050415, 0.050409, 0.050404, 0.050398, 0.050393, 0.050388, 0.050383, 0.050378, 0.050373, 0.050368, 0.050364, 0.050359, 0.050355, 0.050350, 0.050346, 0.050342, 0.050338, 0.050334, 0.050330, 0.050327, 0.050323, 0.050320, 0.050317, 0.050314, 0.050311, 0.050308, 0.050305, 0.050302, 0.050300, 0.050297, 0.050295, 0.050293, 0.050291, 0.050289, 0.050287, 0.050286, 0.050284, 0.050283, 0.050282, 0.050281, 0.050280, 0.050279, 0.050279, 0.050278, 0.050278, 0.050278, 0.050278, 0.050278, 0.050279, 0.050279, 0.050280, 0.050281, 0.050282, 0.050283, 0.050284, 0.050286, 0.050287, 0.050289, 0.050291, 0.050293, 0.050295, 0.050297, 0.050300, 0.050303, 0.050305, 0.050308, 0.050311, 0.050315, 0.050318, 0.050322, 0.050325, 0.050329, 0.050333, 0.050338, 0.050342, 0.050346, 0.050351, 0.050356, 0.050361, 0.050366, 0.050371, 0.050376, 0.050381, 0.050387, 0.050393, 0.050399, 0.050405, 0.050411, 0.050417, 0.050423, 0.050430, 0.050437, 0.050443, 0.050450, 0.050457, 0.050464, 0.050471, 0.050478, 0.050485, 0.050493, 0.050500, 0.050508, 0.050516, 0.050523, 0.050531, 0.050539, 0.050547, 0.050555, 0.050564, 0.050572, 0.050580, 0.050589, 0.050597, 0.050606, 0.050614, 0.050623, 0.050632, 0.050640, 0.050649, 0.050658, 0.050666, 0.050675, 0.050684, 0.050693, 0.050702, 0.050711, 0.050720, 0.050729, 0.050738, 0.050747, 0.050756, 0.050765, 0.050774, 0.050783, 0.050792, 0.050801, 0.050810, 0.050819, 0.050828, 0.050837, 0.050846, 0.050855, 0.050864, 0.050873, 0.050882, 0.050891, 0.050899, 0.050908, 0.050917, 0.050926, 0.050934, 0.050943, 0.050951, 0.050959, 0.050968, 0.050976, 0.050984, 0.050993, 0.051001, 0.051009, 0.051017, 0.051024, 0.051032, 0.051040, 0.051048, 0.051055, 0.051063, 0.051070, 0.051077, 0.051084, 0.051091, 0.051098, 0.051105, 0.051112, 0.051119, 0.051125, 0.051132, 0.051138, 0.051145, 0.051151, 0.051157, 0.051163, 0.051169, 0.051174, 0.051180, 0.051185, 0.051191, 0.051196, 0.051201, 0.051206, 0.051210, 0.051215, 0.051220, 0.051224, 0.051228, 0.051232, 0.051236, 0.051240, 0.051244, 0.051248, 0.051252, 0.051255, 0.051258, 0.051261, 0.051264, 0.051267, 0.051270, 0.051272, 0.051275, 0.051277, 0.051279, 0.051281, 0.051283, 0.051284, 0.051286, 0.051287, 0.051289, 0.051290, 0.051291, 0.051291, 0.051292, 0.051293, 0.051293, 0.051294, 0.051294, 0.051294, 0.051294, 0.051294, 0.051293, 0.051292, 0.051291, 0.051291, 0.051290, 0.051288, 0.051287, 0.051285, 0.051283, 0.051282, 0.051280, 0.051278, 0.051275, 0.051273, 0.051271, 0.051268, 0.051265, 0.051262, 0.051259, 0.051256, 0.051252, 0.051248, 0.051245, 0.051241, 0.051237, 0.051232, 0.051228, 0.051224, 0.051219, 0.051214, 0.051209, 0.051204, 0.051199, 0.051194, 0.051189, 0.051183, 0.051178, 0.051172, 0.051166, 0.051159, 0.051153, 0.051147, 0.051140, 0.051134, 0.051127, 0.051120, 0.051113, 0.051106, 0.051098, 0.051091, 0.051083, 0.051076, 0.051068, 0.051060, 0.051052, 0.051043, 0.051035, 0.051027, 0.051018, 0.051009, 0.051000, 0.050992, 0.050983, 0.050973, 0.050964, 0.050955, 0.050945, 0.050936, 0.050926, 0.050916, 0.050906, 0.050896, 0.050885, 0.050875, 0.050865, 0.050854, 0.050843, 0.050832, 0.050821, 0.050810, 0.050799, 0.050788, 0.050777, 0.050765, 0.050754, 0.050742, 0.050731, 0.050719, 0.050707, 0.050695, 0.050683, 0.050670, 0.050658, 0.050646, 0.050633, 0.050621, 0.050608, 0.050595, 0.050582, 0.050569, 0.050556, 0.050543, 0.050530, 0.050516, 0.050503, 0.050489, 0.050476, 0.050462, 0.050448, 0.050435, 0.050421, 0.050407, 0.050393, 0.050379, 0.050364, 0.050350, 0.050336, 0.050322, 0.050307, 0.050292, 0.050278, 0.050263, 0.050249, 0.050234, 0.050219, 0.050204, 0.050189, 0.050174, 0.050159, 0.050144, 0.050128, 0.050113, 0.050098, 0.050083, 0.050067, 0.050052, 0.050036, 0.050020, 0.050005, 0.049989, 0.049973, 0.049957, 0.049941, 0.049925, 0.049910, 0.049894, 0.049878, 0.049862, 0.049846, 0.049830, 0.049814, 0.049798, 0.049781, 0.049766, 0.049749, 0.049733, 0.049717, 0.049701, 0.049684, 0.049668, 0.049652, 0.049635, 0.049619, 0.049603, 0.049587, 0.049570, 0.049554, 0.049538, 0.049522, 0.049505, 0.049489, 0.049473, 0.049457, 0.049441, 0.049424, 0.049408, 0.049392, 0.049376, 0.049360, 0.049344, 0.049328, 0.049312, 0.049296, 0.049280, 0.049264, 0.049248, 0.049232, 0.049216, 0.049200, 0.049185, 0.049169, 0.049153, 0.049138, 0.049122, 0.049107, 0.049091, 0.049076, 0.049061, 0.049045, 0.049030, 0.049015, 0.049000, 0.048985, 0.048970, 0.048956, 0.048941, 0.048926, 0.048912, 0.048897, 0.048883, 0.048869, 0.048855, 0.048840, 0.048826, 0.048812, 0.048799, 0.048785, 0.048771, 0.048758, 0.048744, 0.048731, 0.048718, 0.048704, 0.048691, 0.048679, 0.048666, 0.048653, 0.048641, 0.048628, 0.048616, 0.048604, 0.048592, 0.048580, 0.048568, 0.048556, 0.048545, 0.048533, 0.048522, 0.048511, 0.048500, 0.048489, 0.048478, 0.048468, 0.048457, 0.048447, 0.048437, 0.048426, 0.048416, 0.048406, 0.048396, 0.048387, 0.048377, 0.048368, 0.048359, 0.048350, 0.048341, 0.048332, 0.048323, 0.048315, 0.048306, 0.048298, 0.048290, 0.048282, 0.048274, 0.048266, 0.048259, 0.048251, 0.048244, 0.048237, 0.048230, 0.048223, 0.048216, 0.048210, 0.048203, 0.048197, 0.048191, 0.048185, 0.048179, 0.048173, 0.048167, 0.048162, 0.048156, 0.048151, 0.048146, 0.048141, 0.048136, 0.048132, 0.048127, 0.048123, 0.048119, 0.048114, 0.048111, 0.048107, 0.048103, 0.048099, 0.048096, 0.048093, 0.048090, 0.048087, 0.048084, 0.048081, 0.048078, 0.048076, 0.048073, 0.048071, 0.048069, 0.048067, 0.048065, 0.048063, 0.048062, 0.048060, 0.048059, 0.048058, 0.048056, 0.048055, 0.048055, 0.048054, 0.048053, 0.048053, 0.048052, 0.048052, 0.048052, 0.048052, 0.048052, 0.048052, 0.048052, 0.048052, 0.048053, 0.048054, 0.048055, 0.048055, 0.048056, 0.048058, 0.048059, 0.048060, 0.048062, 0.048063, 0.048065, 0.048067, 0.048069, 0.048071, 0.048073, 0.048075, 0.048077, 0.048080, 0.048082, 0.048085, 0.048088, 0.048091, 0.048094, 0.048097, 0.048100, 0.048104, 0.048107, 0.048111, 0.048115, 0.048118, 0.048122, 0.048126, 0.048130, 0.048134, 0.048139, 0.048143, 0.048147, 0.048152, 0.048156, 0.048161, 0.048166, 0.048171, 0.048176, 0.048181, 0.048186, 0.048191, 0.048196, 0.048202, 0.048207, 0.048213, 0.048218, 0.048224, 0.048230, 0.048236, 0.048242, 0.048248, 0.048254, 0.048260, 0.048266, 0.048272, 0.048279, 0.048285, 0.048292, 0.048298, 0.048304, 0.048311, 0.048317, 0.048324, 0.048331, 0.048337, 0.048344, 0.048351, 0.048358, 0.048364, 0.048371, 0.048378, 0.048385, 0.048392, 0.048399, 0.048406, 0.048413, 0.048420, 0.048427, 0.048434, 0.048441, 0.048448, 0.048455, 0.048462, 0.048469, 0.048476, 0.048483, 0.048490, 0.048497, 0.048504, 0.048511, 0.048517, 0.048524, 0.048531, 0.048537, 0.048544, 0.048551, 0.048557, 0.048564, 0.048570, 0.048577, 0.048583, 0.048589, 0.048596, 0.048602, 0.048608, 0.048614, 0.048620, 0.048626, 0.048632, 0.048637, 0.048643, 0.048649, 0.048654, 0.048659, 0.048665, 0.048670, 0.048675, 0.048680, 0.048685, 0.048690, 0.048695, 0.048700, 0.048704, 0.048709, 0.048713, 0.048717, 0.048721, 0.048725, 0.048729, 0.048733, 0.048736, 0.048740, 0.048743, 0.048746, 0.048749, 0.048752, 0.048755, 0.048758, 0.048760, 0.048762, 0.048764, 0.048766, 0.048768, 0.048770, 0.048772, 0.048773, 0.048775, 0.048776, 0.048777, 0.048778, 0.048779, 0.048779, 0.048780, 0.048780, 0.048780, 0.048780, 0.048780, 0.048780, 0.048779, 0.048779, 0.048778, 0.048777, 0.048776, 0.048775, 0.048773, 0.048772, 0.048770, 0.048768, 0.048766, 0.048764, 0.048762, 0.048760, 0.048757, 0.048755, 0.048752, 0.048749, 0.048746, 0.048743, 0.048739, 0.048736, 0.048732, 0.048728, 0.048724, 0.048720, 0.048716, 0.048712, 0.048708, 0.048703, 0.048698, 0.048694, 0.048689, 0.048684, 0.048679, 0.048673, 0.048668, 0.048662, 0.048657, 0.048651, 0.048645, 0.048640, 0.048634, 0.048628, 0.048622, 0.048615, 0.048609, 0.048603, 0.048596, 0.048590, 0.048583, 0.048576, 0.048570, 0.048563, 0.048556, 0.048549, 0.048542, 0.048535, 0.048528, 0.048521, 0.048514, 0.048507, 0.048500, 0.048492, 0.048485, 0.048478, 0.048470, 0.048463, 0.048455, 0.048448, 0.048440, 0.048433, 0.048425, 0.048418, 0.048410, 0.048403, 0.048395, 0.048388, 0.048380, 0.048373, 0.048365, 0.048358, 0.048350, 0.048343, 0.048335, 0.048328, 0.048320, 0.048313, 0.048306, 0.048298, 0.048291, 0.048284, 0.048277, 0.048270, 0.048263, 0.048256, 0.048249, 0.048242, 0.048235, 0.048228, 0.048221, 0.048215, 0.048208, 0.048201, 0.048195, 0.048188, 0.048182, 0.048175, 0.048169, 0.048163, 0.048156, 0.048150, 0.048144, 0.048138, 0.048132, 0.048127, 0.048121, 0.048115, 0.048110, 0.048104, 0.048099, 0.048093, 0.048088, 0.048083, 0.048078, 0.048073, 0.048068, 0.048063, 0.048058, 0.048053, 0.048048, 0.048044, 0.048039, 0.048034, 0.048030, 0.048026, 0.048021, 0.048017, 0.048013, 0.048009, 0.048005, 0.048001, 0.047997, 0.047993, 0.047989, 0.047986, 0.047982, 0.047978, 0.047975, 0.047971, 0.047968, 0.047965, 0.047961, 0.047958, 0.047955, 0.047952, 0.047949, 0.047946, 0.047943, 0.047940, 0.047937, 0.047934, 0.047931, 0.047928, 0.047926, 0.047923, 0.047920, 0.047917, 0.047915, 0.047912, 0.047910, 0.047907, 0.047904, 0.047902, 0.047900, 0.047897, 0.047895, 0.047892, 0.047890, 0.047887, 0.047885, 0.047883, 0.047881, 0.047878, 0.047876, 0.047874, 0.047871, 0.047869, 0.047867, 0.047864, 0.047862, 0.047859, 0.047857, 0.047855, 0.047852, 0.047850, 0.047847, 0.047845, 0.047842, 0.047840, 0.047838, 0.047835, 0.047833, 0.047830, 0.047828, 0.047825, 0.047822, 0.047820, 0.047817, 0.047814, 0.047812, 0.047809, 0.047806, 0.047804, 0.047801, 0.047798, 0.047795, 0.047793, 0.047790, 0.047787, 0.047784, 0.047781, 0.047778, 0.047775, 0.047772, 0.047769, 0.047766, 0.047763, 0.047760, 0.047757, 0.047754, 0.047751, 0.047747, 0.047744, 0.047741, 0.047738, 0.047735, 0.047731, 0.047728, 0.047725, 0.047721, 0.047718, 0.047715, 0.047711, 0.047708, 0.047705, 0.047701, 0.047698, 0.047694, 0.047691, 0.047687, 0.047684, 0.047680, 0.047677, 0.047673, 0.047670, 0.047666, 0.047663, 0.047659, 0.047656, 0.047652, 0.047649, 0.047646, 0.047642, 0.047639, 0.047635, 0.047632, 0.047628, 0.047625, 0.047621, 0.047618, 0.047614, 0.047611, 0.047608, 0.047605, 0.047601, 0.047598, 0.047595, 0.047592, 0.047588, 0.047585, 0.047582, 0.047579, 0.047575, 0.047572, 0.047569, 0.047566, 0.047563, 0.047560, 0.047557, 0.047554, 0.047551, 0.047548, 0.047545, 0.047542, 0.047539, 0.047536, 0.047534, 0.047531, 0.047528, 0.047525, 0.047523, 0.047520, 0.047517, 0.047515, 0.047512, 0.047509, 0.047507, 0.047504, 0.047502, 0.047500, 0.047497, 0.047495, 0.047493, 0.047490, 0.047488, 0.047486, 0.047484, 0.047481, 0.047479, 0.047477, 0.047475, 0.047473, 0.047471, 0.047469, 0.047467, 0.047466, 0.047464, 0.047462, 0.047460, 0.047458, 0.047456, 0.047454, 0.047452, 0.047451, 0.047449, 0.047447, 0.047445, 0.047444, 0.047442, 0.047440, 0.047439, 0.047437, 0.047435, 0.047434, 0.047432, 0.047431, 0.047429, 0.047428, 0.047426, 0.047425, 0.047423, 0.047422, 0.047420, 0.047419, 0.047417, 0.047416, 0.047414, 0.047413, 0.047411, 0.047410, 0.047408, 0.047407, 0.047405, 0.047404, 0.047402, 0.047400, 0.047399, 0.047397, 0.047395, 0.047394, 0.047392, 0.047391, 0.047389, 0.047387, 0.047385, 0.047384, 0.047382, 0.047380, 0.047378, 0.047377, 0.047375, 0.047373, 0.047371, 0.047369, 0.047367, 0.047365, 0.047363, 0.047361, 0.047359, 0.047357, 0.047355, 0.047352, 0.047350, 0.047348, 0.047346, 0.047343, 0.047341, 0.047339, 0.047336, 0.047334, 0.047331, 0.047329, 0.047327, 0.047324, 0.047321, 0.047319, 0.047316, 0.047314, 0.047311, 0.047308, 0.047305, 0.047302, 0.047299, 0.047296, 0.047293, 0.047290, 0.047287, 0.047284, 0.047281, 0.047278, 0.047275, 0.047271, 0.047268, 0.047265, 0.047261, 0.047258, 0.047255, 0.047251, 0.047248, 0.047244, 0.047241, 0.047237, 0.047234, 0.047230, 0.047226, 0.047223, 0.047219, 0.047216, 0.047212, 0.047208, 0.047204, 0.047201, 0.047197, 0.047193, 0.047189, 0.047185, 0.047182, 0.047178, 0.047174, 0.047170, 0.047166, 0.047162, 0.047158, 0.047155, 0.047151, 0.047147, 0.047143, 0.047139, 0.047135, 0.047131, 0.047128, 0.047124, 0.047120, 0.047117, 0.047113, 0.047109, 0.047106, 0.047102, 0.047099, 0.047095, 0.047091, 0.047088, 0.047085, 0.047081, 0.047078, 0.047074, 0.047071, 0.047068, 0.047065, 0.047061, 0.047058, 0.047055, 0.047052, 0.047050, 0.047047, 0.047044, 0.047041, 0.047038, 0.047036, 0.047033, 0.047031, 0.047028, 0.047026, 0.047024, 0.047021, 0.047019, 0.047017, 0.047015, 0.047013, 0.047011, 0.047010, 0.047008, 0.047007, 0.047005, 0.047004, 0.047003, 0.047002, 0.047001, 0.047000, 0.046999, 0.046998, 0.046998, 0.046998, 0.046997, 0.046997, 0.046997, 0.046997, 0.046997, 0.046997, 0.046998, 0.046998, 0.046999, 0.046999, 0.047000, 0.047001, 0.047002, 0.047003, 0.047004, 0.047006, 0.047007, 0.047009, 0.047011, 0.047012, 0.047014, 0.047016, 0.047019, 0.047021, 0.047023, 0.047026, 0.047029, 0.047031, 0.047034, 0.047037, 0.047040, 0.047043, 0.047047, 0.047050, 0.047053, 0.047057, 0.047061
0.028953, 0.028959, 0.028966, 0.028972, 0.028979, 0.028985, 0.028992, 0.028999, 0.029006, 0.029012, 0.029019, 0.029026, 0.029033, 0.029040, 0.029047, 0.029054, 0.029061, 0.029068, 0.029075, 0.029083, 0.029090, 0.029097, 0.029105, 0.029112, 0.029120, 0.029127, 0.029135, 0.029142, 0.029150, 0.029158, 0.029166, 0.029174, 0.029182, 0.029190, 0.029198, 0.029206, 0.029214, 0.029222, 0.029231, 0.029239, 0.029247, 0.029255, 0.029264, 0.029272, 0.029281, 0.029290, 0.029298, 0.029307, 0.029316, 0.029324, 0.029333, 0.029342, 0.029351, 0.029360, 0.029369, 0.029378, 0.029387, 0.029396, 0.029406, 0.029415, 0.029424, 0.029433, 0.029443, 0.029452, 0.029462, 0.029471, 0.029480, 0.029490, 0.029499, 0.029509, 0.029518, 0.029528, 0.029538, 0.029547, 0.029557, 0.029566, 0.029576, 0.029586, 0.029595, 0.029605, 0.029615, 0.029624, 0.029634, 0.029643, 0.029653, 0.029663, 0.029672, 0.029682, 0.029691, 0.029701, 0.029710, 0.029720, 0.029729, 0.029738, 0.029747, 0.029757, 0.029766, 0.029775, 0.029784, 0.029793, 0.029802, 0.029811, 0.029820, 0.029828, 0.029837, 0.029846, 0.029854, 0.029863, 0.029871, 0.029879, 0.029887, 0.029895, 0.029903, 0.029911, 0.029919, 0.029927, 0.029934, 0.029942, 0.029949, 0.029956, 0.029963, 0.029970, 0.029977, 0.029984, 0.029990, 0.029996, 0.030003, 0.030009, 0.030015, 0.030021, 0.030026, 0.030032, 0.030037, 0.030043, 0.030048, 0.030053, 0.030057, 0.030062, 0.030067, 0.030071, 0.030075, 0.030079, 0.030083, 0.030087, 0.030090, 0.030094, 0.030097, 0.030100, 0.030103, 0.030106, 0.030108, 0.030110, 0.030112, 0.030114, 0.030116, 0.030118, 0.030119, 0.030121, 0.030122, 0.030123, 0.030123, 0.030124, 0.030124, 0.030124, 0.030124, 0.030124, 0.030124, 0.030123, 0.030122, 0.030121, 0.030120, 0.030119, 0.030118, 0.030116, 0.030114, 0.030113, 0.030110, 0.030108, 0.030106, 0.030103, 0.030100, 0.030097, 0.030094, 0.030090, 0.030087, 0.030083, 0.030080, 0.030076, 0.030071, 0.030067, 0.030063, 0.030058, 0.030053, 0.030048, 0.030043, 0.030038, 0.030033, 0.030027, 0.030022, 0.030016, 0.030010, 0.030004, 0.029997, 0.029991, 0.029985, 0.029978, 0.029971, 0.029964, 0.029957, 0.029950, 0.029943, 0.029935, 0.029927, 0.029920, 0.029912, 0.029904, 0.029896, 0.029888, 0.029879, 0.029871, 0.029863, 0.029854, 0.029845, 0.029837, 0.029828, 0.029819, 0.029810, 0.029801, 0.029791, 0.029782, 0.029773, 0.029763, 0.029754, 0.029744, 0.029734, 0.029724, 0.029714, 0.029704, 0.029694, 0.029684, 0.029673, 0.029663, 0.029652, 0.029642, 0.029631, 0.029620, 0.029610, 0.029599, 0.029588, 0.029577, 0.029566, 0.029555, 0.029544, 0.029532, 0.029521, 0.029510, 0.029498, 0.029487, 0.029475, 0.029464, 0.029452, 0.029440, 0.029429, 0.029417, 0.029405, 0.029393, 0.029381, 0.029369, 0.029357, 0.029345, 0.029332, 0.029320, 0.029308, 0.029296, 0.029284, 0.029271, 0.029259, 0.029247, 0.029234, 0.029222, 0.029209, 0.029197, 0.029184, 0.029172, 0.029159, 0.029147, 0.029134, 0.029121, 0.029109, 0.029096, 0.029083, 0.029071, 0.029058, 0.029045, 0.029033, 0.029020, 0.029007, 0.028995, 0.028982, 0.028969, 0.028957, 0.028944, 0.028931, 0.028919, 0.028906, 0.028894, 0.028882, 0.028869, 0.028857, 0.028844, 0.028832, 0.028819, 0.028807, 0.028795, 0.028783, 0.028771, 0.028759, 0.028747, 0.028735, 0.028723, 0.028711, 0.028699, 0.028688, 0.028676, 0.028665, 0.028653, 0.028642, 0.028631, 0.028620, 0.028609, 0.028598, 0.028587, 0.028576, 0.028566, 0.028555, 0.028545, 0.028534, 0.028524, 0.028514, 0.028504, 0.028495, 0.028485, 0.028476, 0.028466, 0.028457, 0.028448, 0.028439, 0.028431, 0.028423, 0.028414, 0.028406, 0.028398, 0.028391, 0.028383, 0.028376, 0.028369, 0.028362, 0.028355, 0.028348, 0.028342, 0.028336, 0.028330, 0.028324, 0.028318, 0.028313, 0.028308, 0.028303, 0.028299, 0.028294, 0.028290, 0.028286, 0.028283, 0.028279, 0.028276, 0.028273, 0.028271, 0.028268, 0.028266, 0.028264, 0.028262, 0.028261, 0.028260, 0.028259, 0.028259, 0.028258, 0.028258, 0.028259, 0.028259, 0.028260, 0.028261, 0.028263, 0.028265, 0.028267, 0.028269, 0.028271, 0.028274, 0.028278, 0.028281, 0.028285, 0.028289, 0.028293, 0.028298, 0.028303, 0.028308, 0.028313, 0.028319, 0.028325, 0.028331, 0.028338, 0.028345, 0.028352, 0.028359, 0.028367, 0.028375, 0.028383, 0.028392, 0.028401, 0.028410, 0.028420, 0.028430, 0.028440, 0.028450, 0.028461, 0.028471, 0.028483, 0.028494, 0.028506, 0.028518, 0.028530, 0.028542, 0.028555, 0.028568, 0.028581, 0.028595, 0.028609, 0.028623, 0.028637, 0.028652, 0.028666, 0.028681, 0.028696, 0.028712, 0.028728, 0.028744, 0.028760, 0.028776, 0.028793, 0.028810, 0.028827, 0.028844, 0.028861, 0.028879, 0.028897, 0.028915, 0.028933, 0.028951, 0.028970, 0.028988, 0.029007, 0.029026, 0.029046, 0.029065, 0.029085, 0.029105, 0.029125, 0.029145, 0.029165, 0.029186, 0.029206, 0.029227, 0.029248, 0.029269, 0.029290, 0.029311, 0.029333, 0.029354, 0.029376, 0.029397, 0.029419, 0.029441, 0.029463, 0.029485, 0.029508, 0.029530, 0.029552, 0.029575, 0.029597, 0.029620, 0.029643, 0.029666, 0.029689, 0.029712, 0.029735, 0.029758, 0.029781, 0.029804, 0.029828, 0.029851, 0.029874, 0.029898, 0.029921, 0.029945, 0.029968, 0.029992, 0.030015, 0.030039, 0.030062, 0.030086, 0.030110, 0.030134, 0.030158, 0.030181, 0.030205, 0.030229, 0.030253, 0.030276, 0.030300, 0.030324, 0.030348, 0.030371, 0.030395, 0.030419, 0.030443, 0.030466, 0.030490, 0.030514, 0.030537, 0.030561, 0.030585, 0.030608, 0.030632, 0.030655, 0.030679, 0.030702, 0.030726, 0.030749, 0.030773, 0.030796, 0.030819, 0.030843, 0.030866, 0.030889, 0.030912, 0.030935, 0.030958, 0.030981, 0.031004, 0.031027, 0.031050, 0.031073, 0.031096, 0.031119, 0.031141, 0.031164, 0.031187, 0.031209, 0.031232, 0.031255, 0.031277, 0.031300, 0.031322, 0.031344, 0.031366, 0.031389, 0.031411, 0.031433, 0.031455, 0.031477, 0.031499, 0.031521, 0.031543, 0.031565, 0.031587, 0.031608, 0.031630, 0.031652, 0.031674, 0.031695, 0.031717, 0.031738, 0.031760, 0.031781, 0.031803, 0.031824, 0.031846, 0.031867, 0.031889, 0.031910, 0.031931, 0.031953, 0.031974, 0.031995, 0.032016, 0.032037, 0.032059, 0.032080, 0.032101, 0.032122, 0.032144, 0.032165, 0.032186, 0.032207, 0.032228, 0.032249, 0.032271, 0.032292, 0.032313, 0.032335, 0.032356, 0.032377, 0.032399, 0.032421, 0.032442, 0.032464, 0.032485, 0.032507, 0.032529, 0.032550, 0.032572, 0.032594, 0.032616, 0.032638, 0.032660, 0.032683, 0.032705, 0.032728, 0.032750, 0.032773, 0.032796, 0.032818, 0.032841, 0.032864, 0.032888, 0.032911, 0.032934, 0.032958, 0.032981, 0.033005, 0.033029, 0.033053, 0.033078, 0.033102, 0.033127, 0.033152, 0.033177, 0.033202, 0.033227, 0.033253, 0.033279, 0.033305, 0.033331, 0.033357, 0.033384, 0.033410, 0.033437, 0.033465, 0.033492, 0.033520, 0.033548, 0.033576, 0.033605, 0.033633, 0.033662, 0.033692, 0.033722, 0.033752, 0.033782, 0.033812, 0.033843, 0.033874, 0.033906, 0.033937, 0.033969, 0.034002, 0.034035, 0.034068, 0.034101, 0.034135, 0.034169, 0.034204, 0.034239, 0.034274, 0.034310, 0.034346, 0.034382, 0.034419, 0.034457, 0.034495, 0.034533, 0.034572, 0.034611, 0.034651, 0.034691, 0.034731, 0.034772, 0.034813, 0.034855, 0.034898, 0.034941, 0.034984, 0.035028, 0.035073, 0.035118, 0.035163, 0.035209, 0.035256, 0.035303, 0.035351, 0.035399, 0.035448, 0.035497, 0.035548, 0.035598, 0.035650, 0.035701, 0.035754, 0.035807, 0.035861, 0.035915, 0.035970, 0.036026, 0.036082, 0.036139, 0.036197, 0.036255, 0.036314, 0.036374, 0.036434, 0.036495, 0.036557, 0.036620, 0.036683, 0.036747, 0.036812, 0.036878, 0.036945, 0.037012, 0.037080, 0.037149, 0.037218, 0.037289, 0.037360, 0.037432, 0.037505, 0.037579, 0.037653, 0.037729, 0.037805, 0.037882, 0.037960, 0.038040, 0.038120, 0.038200, 0.038282, 0.038365, 0.038449, 0.038533, 0.038619, 0.038705, 0.038793, 0.038882, 0.038971, 0.039062, 0.039153, 0.039246, 0.039339, 0.039434, 0.039529, 0.039626, 0.039724, 0.039823, 0.039923, 0.040024, 0.040126, 0.040230, 0.040334, 0.040440, 0.040547, 0.040655, 0.040764, 0.040874, 0.040985, 0.041098, 0.041212, 0.041327, 0.041443, 0.041560, 0.041679, 0.041799, 0.041921, 0.042043, 0.042167, 0.042292, 0.042418, 0.042546, 0.042675, 0.042806, 0.042938, 0.043071, 0.043205, 0.043341, 0.043478, 0.043617, 0.043756, 0.043898, 0.044041, 0.044185, 0.044330, 0.044477, 0.044626, 0.044775, 0.044927, 0.045080, 0.045234, 0.045390, 0.045547, 0.045706, 0.045866, 0.046028, 0.046191, 0.046356, 0.046523, 0.046691, 0.046861, 0.047032, 0.047205, 0.047379, 0.047555, 0.047733, 0.047912, 0.048093, 0.048276, 0.048460, 0.048645, 0.048833, 0.049022, 0.049213, 0.049405, 0.049600, 0.049795, 0.049993, 0.050192, 0.050393, 0.050596, 0.050800, 0.051006, 0.051214, 0.051423, 0.051635, 0.051848, 0.052062, 0.052279, 0.052497, 0.052717, 0.052939, 0.053162, 0.053388, 0.053615, 0.053844, 0.054075, 0.054307, 0.054541, 0.054777, 0.055015, 0.055255, 0.055496, 0.055739, 0.055984, 0.056231, 0.056480, 0.056730, 0.056983, 0.057237, 0.057493, 0.057750, 0.058010, 0.058271, 0.058534, 0.058799, 0.059066, 0.059335, 0.059605, 0.059877, 0.060151, 0.060426, 0.060704, 0.060983, 0.061264, 0.061547, 0.061831, 0.062118, 0.062406, 0.062696, 0.062987, 0.063281, 0.063576, 0.063873, 0.064171, 0.064471, 0.064773, 0.065077, 0.065382, 0.065689, 0.065998, 0.066308, 0.066620, 0.066934, 0.067249, 0.067566, 0.067885, 0.068205, 0.068527, 0.068851, 0.069176, 0.069503, 0.069831, 0.070161, 0.070492, 0.070825, 0.071159, 0.071495, 0.071833, 0.072172, 0.072512, 0.072854, 0.073197, 0.073541, 0.073887, 0.074235, 0.074584, 0.074934, 0.075285, 0.075638, 0.075993, 0.076348, 0.076705, 0.077063, 0.077423, 0.077784, 0.078146, 0.078509, 0.078873, 0.079239, 0.079605, 0.079973, 0.080342, 0.080712, 0.081083, 0.081455, 0.081828, 0.082202, 0.082577, 0.082954, 0.083331, 0.083709, 0.084088, 0.084468, 0.084848, 0.085230, 0.085613, 0.085996, 0.086380, 0.086765, 0.087151, 0.087538, 0.087925, 0.088313, 0.088701, 0.089091, 0.089481, 0.089871, 0.090262, 0.090654, 0.091046, 0.091439, 0.091833, 0.092226, 0.092621, 0.093015, 0.093410, 0.093806, 0.094202, 0.094598, 0.094995, 0.095392, 0.095789, 0.096187, 0.096585, 0.096983, 0.097381, 0.097779, 0.098178, 0.098576, 0.098975, 0.099374, 0.099773, 0.100172, 0.100571, 0.100970, 0.101369, 0.101768, 0.102167, 0.102566, 0.102965, 0.103363, 0.103762, 0.104160, 0.104559, 0.104957, 0.105354, 0.105752, 0.106149, 0.106546, 0.106943, 0.107339, 0.107735, 0.108130, 0.108525, 0.108920, 0.109314, 0.109708, 0.110101, 0.110494, 0.110887, 0.111278, 0.111669, 0.112060, 0.112450, 0.112840, 0.113229, 0.113617, 0.114004, 0.114391, 0.114777, 0.115162, 0.115547, 0.115930, 0.116313, 0.116695, 0.117076, 0.117457, 0.117836, 0.118215, 0.118592, 0.118969, 0.119345, 0.119720, 0.120094, 0.120466, 0.120838, 0.121209, 0.121579, 0.121947, 0.122315, 0.122681, 0.123047, 0.123411, 0.123774, 0.124136, 0.124497, 0.124856, 0.125214, 0.125571, 0.125927, 0.126281, 0.126635, 0.126986, 0.127337, 0.127686, 0.128034, 0.128380, 0.128725, 0.129069, 0.129411, 0.129751, 0.130091, 0.130429, 0.130765, 0.131100, 0.131433, 0.131765, 0.132095, 0.132424, 0.132751, 0.133076, 0.133400, 0.133722, 0.134043, 0.134362, 0.134679, 0.134995, 0.135309, 0.135621, 0.135932, 0.136241, 0.136548, 0.136853, 0.137157, 0.137458, 0.137758, 0.138057, 0.138353, 0.138647, 0.138940, 0.139231, 0.139520, 0.139807, 0.140092, 0.140375, 0.140656, 0.140936, 0.141213, 0.141488, 0.141762, 0.142033, 0.142303, 0.142570, 0.142835, 0.143099, 0.143360, 0.143620, 0.143877, 0.144132, 0.144385, 0.144636, 0.144885, 0.145132, 0.145377, 0.145619, 0.145860, 0.146098, 0.146334, 0.146568, 0.146799, 0.147029, 0.147256, 0.147481, 0.147704, 0.147924, 0.148142, 0.148358, 0.148572, 0.148784, 0.148993, 0.149200, 0.149405, 0.149607, 0.149807, 0.150005, 0.150201, 0.150394, 0.150585, 0.150773, 0.150960, 0.151143, 0.151325, 0.151504, 0.151681, 0.151855, 0.152027, 0.152197, 0.152364, 0.152529, 0.152691, 0.152851, 0.153009, 0.153164, 0.153317, 0.153468, 0.153616, 0.153761, 0.153904, 0.154045, 0.154183, 0.154319, 0.154452, 0.154583, 0.154712, 0.154838, 0.154961, 0.155082, 0.155201, 0.155317, 0.155431, 0.155542, 0.155651, 0.155758, 0.155861, 0.155963, 0.156062, 0.156159, 0.156253, 0.156345, 0.156434, 0.156520, 0.156605, 0.156687, 0.156766, 0.156843, 0.156918, 0.156990, 0.157059, 0.157127, 0.157192, 0.157254, 0.157314, 0.157372, 0.157427, 0.157479, 0.157530, 0.157577, 0.157623, 0.157666, 0.157707, 0.157745, 0.157781, 0.157814, 0.157846, 0.157875, 0.157901, 0.157925, 0.157947, 0.157966, 0.157984, 0.157998, 0.158011, 0.158021, 0.158029, 0.158034, 0.158038, 0.158039, 0.158037, 0.158034, 0.158028, 0.158020, 0.158010, 0.157997, 0.157982, 0.157966, 0.157946, 0.157925, 0.157902, 0.157876, 0.157849, 0.157819, 0.157787, 0.157753, 0.157716, 0.157678, 0.157638, 0.157595, 0.157551, 0.157504, 0.157455, 0.157405, 0.157352, 0.157297, 0.157241, 0.157183, 0.157122, 0.157060, 0.156995, 0.156929, 0.156861, 0.156790, 0.156718, 0.156644, 0.156569, 0.156491, 0.156412, 0.156331, 0.156248, 0.156163, 0.156076, 0.155988, 0.155898, 0.155807, 0.155713, 0.155618, 0.155521, 0.155423, 0.155323, 0.155221, 0.155118, 0.155013, 0.154906, 0.154798, 0.154689, 0.154578, 0.154465, 0.154351, 0.154235, 0.154118, 0.154000, 0.153880, 0.153759, 0.153636, 0.153512, 0.153386, 0.153260, 0.153131, 0.153002, 0.152871, 0.152739, 0.152606, 0.152471, 0.152335, 0.152198, 0.152060, 0.151921, 0.151780, 0.151639, 0.151496, 0.151352, 0.151207, 0.151061, 0.150914, 0.150766, 0.150616, 0.150466, 0.150315, 0.150163, 0.150010, 0.149856, 0.149701, 0.149545, 0.149389, 0.149231, 0.149073, 0.148913, 0.148753, 0.148592, 0.148431, 0.148268, 0.148105, 0.147941, 0.147776, 0.147611, 0.147445, 0.147278, 0.147111, 0.146943, 0.146774, 0.146605, 0.146435, 0.146265, 0.146094, 0.145922, 0.145750, 0.145577, 0.145404, 0.145230, 0.145056, 0.144882, 0.144707, 0.144531, 0.144355, 0.144179, 0.144003, 0.143826, 0.143648, 0.143471, 0.143293, 0.143114, 0.142936, 0.142757, 0.142578, 0.142398, 0.142218, 0.142038, 0.141858, 0.141678, 0.141498, 0.141317, 0.141136, 0.140955, 0.140774, 0.140593, 0.140411, 0.140230, 0.140048, 0.139866, 0.139685, 0.139503, 0.139321, 0.139139, 0.138957, 0.138775, 0.138593, 0.138411, 0.138229, 0.138047, 0.137866, 0.137684, 0.137502, 0.137320, 0.137139, 0.136957, 0.136776, 0.136594, 0.136413, 0.136232, 0.136051, 0.135870, 0.135690, 0.135509, 0.135329, 0.135149, 0.134969, 0.134789, 0.134609, 0.134430, 0.134251, 0.134072, 0.133893, 0.133714, 0.133536, 0.133358, 0.133180, 0.133002, 0.132825, 0.132648, 0.132472, 0.132295, 0.132119, 0.131943, 0.131768, 0.131592, 0.131418, 0.131243, 0.131069, 0.130895, 0.130721, 0.130548, 0.130375, 0.130202, 0.130030, 0.129858, 0.129687, 0.129515, 0.129345, 0.129174, 0.129004, 0.128835, 0.128665, 0.128497, 0.128328, 0.128160, 0.127992, 0.127825, 0.127658, 0.127492, 0.127326, 0.127160, 0.126995, 0.126830, 0.126666, 0.126502, 0.126339, 0.126176, 0.126013, 0.125851, 0.125689, 0.125528, 0.125367, 0.125207, 0.125047, 0.124888, 0.124729, 0.124570, 0.124412, 0.124255, 0.124098, 0.123941, 0.123785, 0.123629, 0.123474, 0.123319, 0.123165, 0.123011, 0.122858, 0.122705, 0.122553, 0.122401, 0.122250, 0.122099, 0.121948, 0.121799, 0.121649, 0.121500, 0.121352, 0.121204, 0.121057, 0.120910, 0.120763, 0.120617, 0.120472, 0.120327, 0.120183, 0.120039, 0.119895, 0.119753, 0.119610, 0.119468, 0.119327, 0.119186, 0.119046, 0.118906, 0.118766, 0.118628, 0.118489, 0.118352, 0.118214, 0.118078, 0.117941, 0.117806, 0.117670, 0.117536, 0.117402, 0.117268, 0.117135, 0.117002, 0.116870, 0.116738, 0.116607, 0.116476, 0.116346, 0.116216, 0.116087, 0.115958, 0.115830, 0.115703, 0.115576, 0.115449, 0.115323, 0.115198, 0.115073, 0.114948, 0.114824, 0.114701, 0.114578, 0.114455, 0.114333, 0.114212, 0.114091, 0.113971, 0.113851, 0.113731, 0.113612, 0.113494, 0.113376, 0.113258, 0.113141, 0.113025, 0.112909, 0.112793, 0.112678, 0.112564, 0.112449, 0.112336, 0.112223, 0.112110, 0.111998, 0.111886, 0.111775, 0.111665, 0.111554, 0.111445, 0.111335, 0.111227, 0.111118, 0.111010, 0.110903, 0.110796, 0.110689, 0.110583, 0.110478, 0.110373, 0.110268, 0.110164, 0.110060, 0.109956, 0.109854, 0.109751, 0.109649, 0.109548, 0.109447, 0.109346, 0.109246, 0.109146, 0.109046, 0.108947, 0.108848, 0.108750, 0.108652, 0.108555, 0.108458, 0.108362, 0.108265, 0.108170, 0.108074, 0.107979, 0.107885, 0.107790, 0.107696, 0.107603, 0.107510, 0.107417, 0.107324, 0.107232, 0.107140, 0.107049, 0.106958, 0.106867, 0.106777, 0.106687, 0.106598, 0.106509, 0.106420, 0.106331, 0.106243, 0.106155, 0.106067, 0.105980, 0.105893, 0.105806, 0.105720, 0.105634, 0.105548, 0.105463, 0.105378, 0.105293, 0.105208, 0.105124, 0.105040, 0.104956, 0.104873, 0.104790, 0.104707, 0.104625, 0.104542, 0.104460, 0.104379, 0.104297, 0.104216, 0.104135, 0.104055, 0.103974, 0.103894, 0.103814, 0.103734, 0.103655, 0.103575, 0.103496, 0.103418, 0.103339, 0.103260, 0.103182, 0.103104, 0.103026, 0.102949, 0.102872, 0.102795, 0.102718, 0.102641, 0.102565, 0.102489, 0.102412, 0.102337, 0.102261, 0.102186, 0.102111, 0.102035, 0.101961, 0.101886, 0.101811, 0.101737, 0.101663, 0.101589, 0.101515, 0.101442, 0.101368, 0.101295, 0.101222, 0.101149, 0.101076, 0.101004, 0.100931, 0.100859, 0.100787, 0.100715, 0.100643, 0.100572, 0.100501, 0.100429, 0.100358, 0.100287, 0.100217, 0.100146, 0.100076, 0.100005, 0.099935, 0.099865, 0.099795, 0.099725, 0.099656, 0.099586, 0.099517, 0.099448, 0.099379, 0.099310, 0.099242, 0.099173, 0.099105, 0.099037, 0.098969, 0.098900, 0.098833, 0.098765, 0.098697, 0.098630, 0.098562, 0.098495, 0.098428, 0.098362, 0.098295, 0.098228, 0.098162, 0.098096, 0.098030, 0.097963, 0.097898, 0.097832, 0.097766, 0.097701, 0.097636, 0.097570, 0.097505, 0.097440, 0.097376, 0.097311, 0.097246, 0.097182, 0.097118, 0.097054, 0.096990, 0.096926, 0.096862, 0.096799, 0.096735, 0.096672, 0.096609, 0.096546, 0.096484, 0.096421, 0.096358, 0.096296, 0.096234, 0.096172, 0.096110, 0.096048, 0.095987, 0.095925, 0.095864, 0.095803, 0.095742, 0.095681, 0.095620, 0.095559, 0.095499, 0.095439, 0.095379, 0.095318, 0.095259, 0.095199, 0.095139, 0.095080, 0.095021, 0.094962, 0.094903, 0.094845, 0.094786, 0.094728, 0.094669, 0.094611, 0.094554, 0.094496, 0.094439, 0.094381, 0.094324, 0.094268, 0.094211, 0.094154, 0.094098, 0.094042, 0.093986, 0.093930, 0.093874, 0.093818, 0.093763, 0.093707, 0.093652, 0.093598, 0.093543, 0.093489, 0.093435, 0.093381, 0.093327, 0.093273, 0.093220, 0.093167, 0.093114, 0.093061, 0.093008, 0.092956, 0.092904, 0.092852, 0.092800, 0.092748, 0.092697, 0.092645, 0.092594, 0.092543, 0.092493, 0.092442, 0.092392, 0.092342, 0.092292, 0.092243, 0.092193, 0.092144, 0.092095, 0.092047, 0.091998, 0.091950, 0.091902, 0.091854, 0.091806, 0.091758, 0.091711, 0.091664, 0.091617, 0.091570, 0.091524, 0.091477, 0.091431, 0.091385, 0.091339, 0.091294, 0.091249, 0.091204, 0.091159, 0.091114, 0.091070, 0.091025, 0.090981, 0.090937, 0.090893, 0.090849, 0.090806, 0.090762, 0.090719, 0.090676, 0.090634, 0.090591, 0.090549, 0.090506, 0.090464, 0.090422, 0.090380, 0.090339, 0.090297, 0.090256, 0.090215, 0.090174, 0.090133, 0.090092, 0.090052, 0.090011, 0.089971, 0.089931, 0.089890, 0.089850, 0.089811, 0.089771, 0.089731, 0.089692, 0.089652, 0.089613, 0.089574, 0.089535, 0.089496, 0.089457, 0.089418, 0.089379, 0.089340, 0.089302, 0.089264, 0.089225, 0.089187, 0.089149, 0.089110, 0.089072, 0.089034, 0.088996, 0.088958, 0.088920, 0.088882, 0.088844, 0.088807, 0.088769, 0.088731, 0.088693, 0.088656, 0.088618, 0.088581, 0.088543, 0.088506, 0.088468, 0.088431, 0.088393, 0.088356, 0.088318, 0.088281, 0.088243, 0.088206, 0.088169, 0.088131, 0.088094, 0.088056, 0.088019, 0.087981, 0.087944, 0.087906, 0.087869, 0.087831, 0.087794, 0.087756, 0.087718, 0.087681, 0.087643, 0.087606, 0.087568, 0.087530, 0.087493, 0.087455, 0.087417, 0.087379, 0.087341, 0.087303, 0.087265, 0.087227, 0.087189, 0.087151, 0.087113, 0.087075, 0.087037, 0.086999, 0.086961, 0.086923, 0.086885, 0.086846, 0.086808, 0.086770, 0.086731, 0.086693, 0.086654, 0.086616, 0.086577, 0.086539, 0.086500, 0.086462, 0.086423, 0.086385, 0.086346, 0.086307, 0.086269, 0.086230, 0.086191, 0.086152, 0.086113, 0.086074, 0.086036, 0.085997, 0.085958, 0.085919, 0.085880, 0.085841, 0.085802, 0.085763, 0.085724, 0.085685, 0.085646, 0.085607, 0.085568, 0.085529, 0.085490, 0.085451, 0.085412, 0.085373, 0.085334, 0.085295, 0.085256, 0.085217, 0.085178, 0.085139, 0.085100, 0.085061, 0.085022, 0.084983, 0.084944, 0.084906, 0.084867, 0.084828, 0.084790, 0.084751, 0.084712, 0.084674, 0.084635, 0.084597, 0.084558, 0.084520, 0.084481, 0.084443, 0.084404, 0.084366, 0.084327, 0.084289, 0.084251, 0.084212, 0.084174, 0.084136, 0.084098, 0.084060, 0.084022, 0.083985, 0.083947, 0.083909, 0.083871, 0.083833, 0.083796, 0.083758, 0.083721, 0.083683, 0.083646, 0.083608, 0.083571, 0.083533, 0.083496, 0.083459, 0.083422, 0.083385, 0.083348, 0.083311, 0.083274, 0.083237, 0.083201, 0.083164, 0.083127, 0.083091, 0.083054, 0.083018, 0.082981, 0.082945, 0.082909, 0.082873, 0.082837, 0.082801, 0.082765, 0.082729, 0.082693, 0.082657, 0.082621, 0.082585, 0.082549, 0.082514, 0.082478, 0.082443, 0.082407, 0.082371, 0.082336, 0.082300, 0.082265, 0.082230, 0.082194, 0.082159, 0.082124, 0.082089, 0.082054, 0.082019, 0.081984, 0.081948, 0.081913, 0.081878, 0.081843, 0.081808, 0.081774, 0.081739, 0.081704, 0.081669, 0.081635, 0.081600, 0.081565, 0.081531, 0.081496, 0.081461, 0.081426, 0.081392, 0.081357, 0.081322, 0.081288, 0.081253, 0.081218, 0.081184, 0.081149, 0.081115, 0.081080, 0.081045, 0.081011, 0.080976, 0.080942, 0.080907, 0.080872, 0.080838, 0.080803, 0.080769, 0.080734, 0.080699, 0.080665, 0.080630, 0.080596, 0.080561, 0.080526, 0.080492, 0.080457, 0.080422, 0.080387, 0.080352, 0.080318, 0.080283, 0.080248, 0.080213, 0.080178, 0.080143, 0.080108, 0.080073, 0.080037, 0.080002, 0.079967, 0.079932, 0.079897, 0.079861, 0.079826, 0.079791, 0.079755, 0.079720, 0.079685, 0.079649, 0.079613, 0.079578, 0.079542, 0.079507, 0.079471, 0.079435, 0.079399, 0.079364, 0.079328, 0.079292, 0.079256, 0.079220, 0.079184, 0.079147, 0.079111, 0.079075, 0.079039, 0.079003, 0.078966, 0.078930, 0.078894, 0.078857, 0.078821, 0.078784, 0.078747, 0.078711, 0.078674, 0.078637, 0.078600, 0.078563, 0.078526, 0.078489, 0.078452, 0.078415, 0.078378, 0.078341, 0.078304, 0.078266, 0.078229, 0.078192, 0.078154, 0.078117, 0.078079, 0.078041, 0.078004, 0.077966, 0.077929, 0.077891, 0.077853, 0.077816, 0.077778, 0.077740, 0.077702, 0.077664, 0.077626, 0.077588, 0.077550, 0.077512, 0.077474, 0.077436, 0.077398, 0.077360, 0.077321, 0.077283, 0.077245, 0.077207, 0.077169, 0.077130, 0.077092, 0.077054, 0.077015, 0.076977, 0.076938, 0.076900, 0.076862, 0.076823, 0.076785, 0.076746, 0.076708, 0.076670, 0.076631, 0.076593, 0.076555, 0.076516, 0.076478, 0.076440, 0.076401, 0.076363, 0.076325, 0.076286, 0.076248, 0.076210, 0.076171, 0.076133, 0.076095, 0.076057, 0.076018, 0.075980, 0.075942, 0.075905, 0.075867, 0.075829, 0.075791, 0.075753, 0.075716, 0.075678, 0.075641, 0.075604, 0.075566, 0.075529, 0.075492, 0.075455, 0.075418, 0.075381, 0.075345, 0.075308, 0.075272, 0.075235, 0.075199, 0.075163, 0.075126, 0.075090, 0.075055, 0.075019, 0.074983, 0.074948, 0.074912, 0.074877, 0.074842, 0.074808, 0.074773, 0.074738, 0.074704, 0.074670, 0.074636, 0.074602, 0.074568, 0.074535, 0.074502, 0.074469, 0.074436, 0.074403, 0.074371, 0.074339, 0.074307, 0.074275, 0.074243, 0.074212, 0.074180, 0.074149, 0.074119, 0.074088, 0.074058, 0.074028, 0.073998, 0.073969, 0.073940, 0.073911, 0.073882, 0.073854, 0.073826, 0.073798, 0.073770, 0.073743, 0.073716, 0.073689, 0.073662, 0.073636, 0.073610, 0.073584, 0.073559, 0.073534, 0.073509, 0.073485, 0.073461, 0.073437, 0.073413, 0.073390, 0.073367, 0.073344, 0.073322, 0.073300, 0.073278, 0.073257, 0.073236, 0.073215, 0.073194, 0.073174, 0.073154, 0.073135, 0.073116, 0.073097, 0.073078, 0.073060, 0.073042, 0.073025, 0.073007, 0.072991, 0.072974, 0.072958, 0.072942, 0.072926, 0.072911, 0.072895, 0.072881, 0.072866, 0.072852, 0.072838, 0.072825, 0.072811, 0.072799, 0.072786, 0.072774, 0.072762, 0.072750, 0.072739, 0.072728, 0.072717, 0.072706, 0.072696, 0.072686, 0.072676, 0.072667, 0.072658, 0.072649, 0.072641, 0.072633, 0.072625, 0.072617, 0.072610, 0.072602, 0.072596, 0.072589, 0.072582, 0.072576, 0.072570, 0.072564, 0.072559, 0.072553, 0.072548, 0.072543, 0.072539, 0.072534, 0.072530, 0.072526, 0.072522, 0.072519, 0.072515, 0.072512, 0.072509, 0.072506, 0.072503, 0.072501, 0.072498, 0.072496, 0.072494, 0.072492, 0.072491, 0.072489, 0.072488, 0.072486, 0.072485, 0.072484, 0.072483, 0.072482, 0.072481, 0.072481, 0.072480, 0.072479, 0.072479, 0.072479, 0.072479, 0.072478, 0.072478, 0.072478, 0.072478, 0.072478, 0.072478, 0.072479, 0.072479, 0.072479, 0.072479, 0.072479, 0.072480, 0.072480, 0.072481, 0.072481, 0.072481, 0.072481, 0.072482, 0.072482, 0.072482, 0.072482, 0.072482, 0.072483, 0.072483, 0.072483, 0.072483, 0.072483, 0.072483, 0.072482, 0.072482, 0.072482, 0.072481, 0.072481, 0.072480, 0.072480, 0.072479, 0.072478, 0.072477, 0.072476, 0.072475, 0.072474, 0.072472, 0.072471, 0.072470, 0.072468, 0.072466, 0.072464, 0.072462, 0.072460, 0.072458, 0.072455, 0.072452, 0.072449, 0.072447, 0.072444, 0.072440, 0.072437, 0.072433, 0.072429, 0.072425, 0.072421, 0.072417, 0.072413, 0.072408, 0.072403, 0.072398, 0.072393, 0.072388, 0.072382, 0.072376, 0.072370, 0.072364, 0.072357, 0.072351, 0.072344, 0.072337, 0.072330, 0.072322, 0.072314, 0.072306, 0.072298, 0.072290, 0.072282, 0.072273, 0.072264, 0.072255, 0.072246, 0.072236, 0.072226, 0.072216, 0.072206, 0.072196, 0.072185, 0.072174, 0.072163, 0.072152, 0.072140, 0.072129, 0.072117, 0.072104, 0.072092, 0.072079, 0.072067, 0.072054, 0.072040, 0.072027, 0.072014, 0.072000, 0.071986, 0.071971, 0.071957, 0.071942, 0.071928, 0.071913, 0.071897, 0.071882, 0.071866, 0.071850, 0.071834, 0.071818, 0.071802, 0.071786, 0.071769, 0.071752, 0.071735, 0.071718, 0.071700, 0.071683, 0.071665, 0.071647, 0.071629, 0.071611, 0.071593, 0.071574, 0.071556, 0.071537, 0.071518, 0.071499, 0.071480, 0.071460, 0.071441, 0.071422, 0.071402, 0.071382, 0.071362, 0.071342, 0.071322, 0.071302, 0.071281, 0.071261, 0.071241, 0.071220, 0.071200, 0.071179, 0.071158, 0.071137, 0.071116, 0.071095, 0.071074, 0.071053, 0.071031, 0.071010, 0.070989, 0.070967, 0.070946, 0.070924, 0.070902, 0.070881, 0.070859, 0.070837, 0.070815, 0.070794, 0.070772, 0.070750, 0.070728, 0.070706, 0.070684, 0.070662, 0.070640, 0.070618, 0.070596, 0.070574, 0.070552, 0.070530, 0.070508, 0.070486, 0.070464, 0.070442, 0.070420, 0.070398, 0.070376, 0.070354, 0.070332, 0.070310, 0.070288, 0.070266, 0.070244, 0.070222, 0.070200, 0.070178, 0.070156, 0.070134, 0.070113, 0.070091, 0.070069, 0.070047, 0.070025, 0.070003, 0.069981, 0.069959, 0.069938, 0.069916, 0.069894, 0.069873, 0.069851, 0.069829, 0.069808, 0.069786, 0.069764, 0.069743, 0.069721, 0.069699, 0.069677, 0.069656, 0.069634, 0.069612, 0.069591, 0.069569, 0.069547, 0.069525, 0.069503, 0.069482, 0.069460, 0.069438, 0.069416, 0.069395, 0.069373, 0.069351, 0.069329, 0.069307, 0.069285, 0.069263, 0.069241, 0.069219, 0.069196, 0.069174, 0.069152, 0.069130, 0.069107, 0.069085, 0.069062, 0.069039, 0.069017, 0.068994, 0.068971, 0.068948, 0.068925, 0.068902, 0.068879, 0.068855, 0.068832, 0.068808, 0.068785, 0.068761, 0.068737, 0.068713, 0.068689, 0.068665, 0.068641, 0.068616, 0.068592, 0.068567, 0.068542, 0.068517, 0.068492, 0.068467, 0.068442, 0.068416, 0.068390, 0.068364, 0.068338, 0.068312, 0.068286, 0.068259, 0.068232, 0.068205, 0.068178, 0.068151, 0.068124, 0.068096, 0.068068, 0.068040, 0.068012, 0.067983, 0.067955, 0.067926, 0.067897, 0.067868, 0.067839, 0.067810, 0.067781, 0.067751, 0.067721, 0.067691, 0.067660, 0.067629, 0.067599, 0.067568, 0.067537, 0.067505, 0.067474, 0.067442, 0.067410, 0.067378, 0.067346, 0.067314, 0.067281, 0.067248, 0.067215, 0.067182, 0.067149, 0.067115, 0.067082, 0.067048, 0.067014, 0.066980, 0.066945, 0.066911, 0.066877, 0.066842, 0.066807, 0.066772, 0.066736, 0.066701, 0.066666, 0.066630, 0.066594, 0.066558, 0.066522, 0.066486, 0.066450, 0.066414, 0.066377, 0.066341, 0.066304, 0.066268, 0.066231, 0.066194, 0.066157, 0.066120, 0.066082, 0.066045, 0.066008, 0.065970, 0.065933, 0.065895, 0.065858, 0.065820, 0.065783, 0.065745, 0.065707, 0.065670, 0.065632, 0.065594, 0.065556, 0.065519, 0.065481, 0.065443, 0.065405, 0.065368, 0.065330, 0.065292, 0.065255, 0.065217, 0.065179, 0.065142, 0.065104, 0.065067, 0.065029, 0.064992, 0.064955, 0.064918, 0.064880, 0.064843, 0.064806, 0.064769, 0.064732, 0.064695, 0.064659, 0.064622, 0.064586, 0.064549, 0.064513, 0.064477, 0.064441, 0.064405, 0.064370, 0.064334, 0.064298, 0.064263, 0.064228, 0.064193, 0.064158, 0.064123, 0.064088, 0.064054, 0.064020, 0.063985, 0.063952, 0.063918, 0.063884, 0.063851, 0.063817, 0.063784, 0.063751, 0.063719, 0.063686, 0.063654, 0.063622, 0.063590, 0.063558, 0.063526, 0.063495, 0.063464, 0.063433, 0.063402, 0.063372, 0.063342, 0.063312, 0.063282, 0.063252, 0.063223, 0.063194, 0.063165, 0.063136, 0.063107, 0.063079, 0.063051, 0.063023, 0.062995, 0.062968, 0.062940, 0.062913, 0.062886, 0.062860, 0.062834, 0.062808, 0.062782, 0.062756, 0.062731, 0.062706, 0.062681, 0.062656, 0.062632, 0.062608, 0.062584, 0.062560, 0.062537, 0.062513, 0.062490, 0.062467, 0.062445, 0.062422, 0.062400, 0.062378, 0.062357, 0.062335, 0.062314, 0.062293, 0.062272, 0.062251, 0.062231, 0.062211, 0.062191, 0.062171, 0.062152, 0.062133, 0.062114, 0.062095, 0.062077, 0.062058, 0.062040, 0.062022, 0.062005, 0.061987, 0.061970, 0.061953, 0.061936, 0.061919, 0.061903, 0.061886, 0.061870, 0.061854, 0.061838, 0.061823, 0.061808, 0.061792, 0.061778, 0.061763, 0.061748, 0.061734, 0.061719, 0.061705, 0.061692, 0.061678, 0.061664, 0.061651, 0.061638, 0.061625, 0.061612, 0.061599, 0.061586, 0.061574, 0.061561, 0.061549, 0.061537, 0.061526, 0.061514, 0.061502, 0.061491, 0.061480, 0.061469, 0.061457, 0.061447, 0.061436, 0.061425, 0.061415, 0.061404, 0.061394, 0.061384, 0.061374, 0.061364, 0.061354, 0.061344, 0.061335, 0.061325, 0.061316, 0.061307, 0.061297, 0.061288, 0.061279, 0.061270, 0.061261, 0.061252, 0.061244, 0.061235, 0.061226, 0.061218, 0.061209, 0.061201, 0.061192, 0.061184, 0.061176, 0.061167, 0.061159, 0.061151, 0.061143, 0.061135, 0.061127, 0.061119, 0.061111, 0.061103, 0.061095, 0.061086, 0.061079, 0.061071, 0.061063, 0.061055, 0.061047, 0.061039, 0.061031, 0.061023, 0.061015, 0.061007, 0.060999, 0.060991, 0.060983, 0.060975, 0.060967, 0.060959, 0.060950, 0.060942, 0.060934, 0.060926, 0.060917, 0.060909, 0.060900, 0.060892, 0.060883, 0.060875, 0.060866, 0.060857, 0.060849, 0.060840, 0.060831, 0.060822, 0.060813, 0.060804, 0.060795, 0.060785, 0.060776, 0.060767, 0.060757, 0.060748, 0.060738, 0.060728, 0.060719, 0.060709, 0.060699, 0.060689, 0.060679, 0.060669, 0.060659, 0.060648, 0.060638, 0.060627, 0.060616, 0.060605, 0.060594, 0.060583, 0.060572, 0.060561, 0.060550, 0.060538, 0.060527, 0.060515, 0.060504, 0.060492, 0.060480, 0.060468, 0.060456, 0.060443, 0.060431, 0.060419, 0.060406, 0.060393, 0.060381, 0.060368, 0.060355, 0.060342, 0.060329, 0.060316, 0.060303, 0.060289, 0.060276, 0.060262, 0.060248, 0.060234, 0.060221, 0.060207, 0.060193, 0.060179, 0.060165, 0.060150, 0.060136, 0.060122, 0.060107, 0.060093, 0.060078, 0.060064, 0.060049, 0.060034, 0.060019, 0.060004, 0.059989, 0.059974, 0.059959, 0.059943, 0.059928, 0.059912, 0.059897, 0.059882, 0.059866, 0.059851, 0.059835, 0.059820, 0.059804, 0.059788, 0.059773, 0.059757, 0.059741, 0.059726, 0.059710, 0.059694, 0.059679, 0.059663, 0.059647, 0.059631, 0.059616, 0.059600, 0.059584, 0.059569, 0.059553, 0.059537, 0.059522, 0.059506, 0.059491, 0.059475, 0.059460, 0.059444, 0.059429, 0.059414, 0.059399, 0.059383, 0.059368, 0.059353, 0.059338, 0.059323, 0.059309, 0.059294, 0.059279, 0.059265, 0.059250, 0.059236, 0.059221, 0.059207, 0.059193, 0.059179, 0.059165, 0.059151, 0.059138, 0.059124, 0.059111, 0.059098, 0.059084, 0.059071, 0.059059, 0.059046, 0.059033, 0.059021, 0.059008, 0.058996, 0.058984, 0.058973, 0.058961, 0.058949, 0.058938, 0.058927, 0.058915, 0.058905, 0.058894, 0.058883, 0.058873, 0.058862, 0.058852, 0.058842, 0.058833, 0.058823, 0.058814, 0.058805, 0.058796, 0.058787, 0.058778, 0.058770, 0.058762, 0.058754, 0.058746, 0.058739, 0.058731, 0.058724, 0.058717, 0.058710, 0.058704, 0.058697, 0.058691, 0.058685, 0.058679, 0.058673, 0.058668, 0.058662, 0.058657, 0.058652, 0.058648, 0.058643, 0.058639, 0.058635, 0.058631, 0.058627, 0.058623, 0.058620, 0.058617, 0.058614, 0.058611, 0.058609, 0.058606, 0.058604, 0.058602, 0.058600, 0.058598, 0.058597, 0.058596, 0.058594, 0.058594, 0.058593, 0.058592, 0.058592, 0.058591, 0.058591, 0.058591, 0.058592, 0.058592, 0.058592, 0.058593, 0.058594, 0.058594, 0.058595, 0.058597, 0.058598, 0.058600, 0.058601, 0.058603, 0.058605, 0.058607, 0.058609, 0.058611, 0.058614, 0.058616, 0.058618, 0.058621, 0.058624, 0.058627, 0.058630, 0.058633, 0.058636, 0.058639, 0.058642, 0.058646, 0.058649, 0.058653, 0.058656, 0.058659, 0.058663, 0.058667, 0.058670, 0.058674, 0.058678, 0.058682, 0.058686, 0.058690, 0.058693, 0.058697, 0.058701, 0.058705, 0.058709, 0.058713, 0.058717, 0.058721, 0.058725, 0.058729, 0.058733, 0.058737, 0.058740, 0.058744, 0.058748, 0.058752, 0.058756, 0.058759, 0.058763, 0.058766, 0.058770, 0.058773, 0.058776, 0.058780, 0.058783, 0.058786, 0.058788, 0.058791, 0.058794, 0.058797, 0.058799, 0.058801, 0.058804, 0.058806, 0.058808, 0.058810, 0.058812, 0.058813, 0.058815, 0.058816, 0.058817, 0.058818, 0.058819, 0.058820, 0.058821, 0.058821, 0.058821, 0.058821, 0.058822, 0.058821, 0.058821, 0.058820, 0.058819, 0.058818, 0.058817, 0.058815, 0.058814, 0.058812, 0.058810, 0.058808, 0.058805, 0.058802, 0.058799, 0.058796, 0.058793, 0.058789, 0.058785, 0.058781, 0.058777, 0.058772, 0.058768, 0.058763, 0.058757, 0.058752, 0.058746, 0.058740, 0.058734, 0.058727, 0.058720, 0.058714, 0.058706, 0.058699, 0.058691, 0.058683, 0.058675, 0.058666, 0.058657, 0.058648, 0.058639, 0.058629, 0.058620, 0.058609, 0.058599, 0.058588, 0.058577, 0.058566, 0.058555, 0.058543, 0.058531, 0.058519, 0.058507, 0.058494, 0.058481, 0.058468, 0.058455, 0.058441, 0.058427, 0.058413, 0.058399, 0.058384, 0.058369, 0.058354, 0.058339, 0.058323, 0.058308, 0.058292, 0.058275, 0.058259, 0.058242, 0.058225, 0.058208, 0.058191, 0.058174, 0.058156, 0.058138, 0.058120, 0.058102, 0.058084, 0.058065, 0.058047, 0.058028, 0.058008, 0.057989, 0.057970, 0.057950, 0.057930, 0.057911, 0.057890, 0.057870, 0.057850, 0.057829, 0.057809, 0.057788, 0.057767, 0.057746, 0.057725, 0.057703, 0.057682, 0.057660, 0.057639, 0.057617, 0.057595, 0.057573, 0.057551, 0.057529, 0.057507, 0.057485, 0.057463, 0.057441, 0.057419, 0.057397, 0.057374, 0.057352, 0.057329, 0.057307, 0.057284, 0.057262, 0.057239, 0.057217, 0.057194, 0.057172, 0.057149, 0.057127, 0.057104, 0.057082, 0.057059, 0.057037, 0.057015, 0.056992, 0.056970, 0.056948, 0.056926, 0.056904, 0.056881, 0.056859, 0.056837, 0.056815, 0.056793, 0.056772, 0.056750, 0.056728, 0.056707, 0.056685, 0.056664, 0.056643, 0.056621, 0.056600, 0.056579, 0.056559, 0.056538, 0.056517, 0.056497, 0.056476, 0.056456, 0.056436, 0.056416, 0.056396, 0.056376, 0.056356, 0.056336, 0.056317, 0.056297, 0.056278, 0.056259, 0.056240, 0.056221, 0.056203, 0.056184, 0.056166, 0.056148, 0.056130, 0.056112, 0.056095, 0.056077, 0.056060, 0.056042, 0.056025, 0.056008, 0.055991, 0.055974, 0.055958, 0.055941, 0.055925, 0.055909, 0.055893, 0.055877, 0.055861, 0.055846, 0.055830, 0.055815, 0.055800, 0.055785, 0.055770, 0.055755, 0.055741, 0.055726, 0.055712, 0.055698, 0.055684, 0.055671, 0.055657, 0.055643, 0.055630, 0.055617, 0.055604, 0.055590, 0.055577, 0.055565, 0.055552, 0.055539, 0.055527, 0.055515, 0.055502, 0.055490, 0.055478, 0.055466, 0.055454, 0.055443, 0.055431, 0.055420, 0.055408, 0.055397, 0.055385, 0.055374, 0.055363, 0.055352, 0.055341, 0.055330, 0.055319, 0.055308, 0.055298, 0.055287, 0.055276, 0.055266, 0.055255, 0.055245, 0.055234, 0.055224, 0.055214, 0.055203, 0.055193, 0.055183, 0.055173, 0.055163, 0.055152, 0.055142, 0.055132, 0.055121, 0.055111, 0.055101, 0.055091, 0.055081, 0.055070, 0.055060, 0.055050, 0.055040, 0.055029, 0.055019, 0.055009, 0.054998, 0.054988, 0.054977, 0.054967, 0.054956, 0.054946, 0.054935, 0.054925, 0.054914, 0.054903, 0.054892, 0.054881, 0.054870, 0.054859, 0.054848, 0.054837, 0.054826, 0.054815, 0.054803, 0.054792, 0.054781, 0.054769, 0.054758, 0.054746, 0.054734, 0.054723, 0.054711, 0.054699, 0.054687, 0.054675, 0.054662, 0.054650, 0.054638, 0.054625, 0.054612, 0.054600, 0.054587, 0.054574, 0.054561, 0.054548, 0.054534, 0.054521, 0.054508, 0.054494, 0.054480, 0.054467, 0.054453, 0.054439, 0.054425, 0.054411, 0.054396, 0.054382, 0.054367, 0.054353, 0.054338, 0.054323, 0.054308, 0.054293, 0.054278, 0.054263, 0.054248, 0.054233, 0.054217, 0.054201, 0.054186, 0.054170, 0.054154, 0.054138, 0.054122, 0.054106, 0.054090, 0.054074, 0.054058, 0.054041, 0.054025, 0.054008, 0.053991, 0.053975, 0.053958, 0.053941, 0.053924, 0.053907, 0.053890, 0.053873, 0.053856, 0.053838, 0.053821, 0.053804, 0.053786, 0.053769, 0.053751, 0.053733, 0.053716, 0.053698, 0.053681, 0.053663, 0.053645, 0.053628, 0.053610, 0.053592, 0.053574, 0.053557, 0.053539, 0.053521, 0.053503, 0.053485, 0.053467, 0.053450, 0.053432, 0.053414, 0.053396, 0.053378, 0.053361, 0.053343, 0.053325, 0.053307, 0.053290, 0.053272, 0.053255, 0.053237, 0.053220, 0.053203, 0.053185, 0.053168, 0.053151, 0.053134, 0.053116, 0.053099, 0.053082, 0.053065, 0.053048, 0.053032, 0.053015, 0.052999, 0.052982, 0.052966, 0.052949, 0.052933, 0.052917, 0.052901, 0.052885, 0.052869, 0.052854, 0.052838, 0.052822, 0.052807, 0.052792, 0.052776, 0.052761, 0.052746, 0.052732, 0.052717, 0.052702, 0.052688, 0.052674, 0.052659, 0.052645, 0.052631, 0.052617, 0.052604, 0.052590, 0.052577, 0.052563, 0.052550, 0.052537, 0.052524, 0.052511, 0.052499, 0.052486, 0.052474, 0.052462, 0.052450, 0.052438, 0.052426, 0.052414, 0.052403, 0.052391, 0.052380, 0.052369, 0.052358, 0.052347, 0.052336, 0.052326, 0.052315, 0.052305, 0.052295, 0.052285, 0.052275, 0.052265, 0.052256, 0.052246, 0.052236, 0.052227, 0.052218, 0.052209, 0.052200, 0.052191, 0.052182, 0.052173, 0.052165, 0.052156, 0.052148, 0.052140, 0.052131, 0.052123, 0.052115, 0.052107, 0.052099, 0.052092, 0.052084, 0.052076, 0.052069, 0.052062, 0.052054, 0.052047, 0.052040, 0.052033, 0.052025, 0.052019, 0.052012, 0.052004, 0.051998, 0.051991, 0.051984, 0.051977, 0.051971, 0.051964, 0.051957, 0.051951, 0.051944, 0.051937, 0.051931, 0.051924, 0.051918, 0.051911, 0.051905, 0.051898, 0.051892, 0.051885, 0.051879, 0.051873, 0.051866, 0.051860, 0.051854, 0.051847, 0.051841, 0.051834, 0.051828, 0.051821, 0.051815, 0.051808, 0.051802, 0.051796, 0.051789, 0.051782, 0.051776, 0.051769, 0.051762, 0.051756, 0.051749, 0.051742, 0.051735, 0.051728, 0.051722, 0.051715, 0.051708, 0.051701, 0.051694, 0.051687, 0.051680, 0.051674, 0.051666, 0.051659, 0.051653, 0.051645, 0.051638, 0.051631, 0.051624, 0.051617, 0.051610, 0.051602, 0.051595, 0.051588, 0.051581, 0.051573, 0.051566, 0.051559, 0.051552, 0.051544, 0.051537, 0.051529, 0.051522, 0.051515, 0.051508, 0.051500, 0.051493, 0.051486, 0.051478, 0.051471, 0.051464, 0.051456, 0.051449, 0.051442, 0.051434, 0.051427, 0.051420, 0.051413, 0.051406, 0.051399, 0.051392, 0.051385, 0.051378, 0.051371, 0.051364, 0.051357, 0.051350, 0.051343, 0.051337, 0.051330, 0.051324, 0.051317, 0.051310, 0.051304, 0.051298, 0.051291, 0.051285, 0.051279, 0.051273, 0.051267, 0.051261, 0.051255, 0.051249, 0.051243, 0.051237, 0.051232, 0.051226, 0.051221, 0.051216, 0.051211, 0.051206, 0.051201, 0.051196, 0.051191, 0.051186, 0.051181, 0.051177, 0.051172, 0.051168, 0.051164, 0.051160, 0.051156, 0.051152, 0.051148, 0.051144, 0.051141, 0.051137, 0.051134, 0.051131, 0.051128, 0.051125, 0.051122, 0.051119, 0.051116, 0.051114, 0.051111, 0.051109, 0.051107, 0.051105, 0.051103, 0.051102, 0.051100, 0.051098, 0.051097, 0.051096, 0.051095, 0.051093, 0.051092, 0.051091, 0.051091, 0.051090, 0.051089, 0.051089, 0.051089, 0.051089, 0.051089, 0.051089, 0.051089, 0.051089, 0.051090, 0.051091, 0.051091, 0.051092, 0.051093, 0.051094, 0.051095, 0.051096, 0.051098, 0.051099, 0.051101, 0.051102, 0.051104, 0.051106, 0.051108, 0.051110, 0.051112, 0.051114, 0.051116, 0.051118, 0.051121, 0.051123, 0.051126, 0.051129, 0.051132, 0.051135, 0.051138, 0.051141, 0.051144, 0.051147, 0.051150, 0.051153, 0.051157, 0.051160, 0.051163, 0.051167, 0.051171, 0.051174, 0.051178, 0.051182, 0.051186, 0.051190, 0.051193, 0.051197, 0.051201, 0.051205, 0.051210, 0.051214, 0.051218, 0.051222, 0.051227, 0.051231, 0.051235, 0.051239, 0.051244, 0.051248, 0.051253, 0.051257, 0.051261, 0.051266, 0.051270, 0.051274, 0.051279, 0.051283, 0.051288, 0.051292, 0.051296, 0.051301, 0.051305, 0.051310, 0.051314, 0.051318, 0.051323, 0.051327, 0.051331, 0.051336, 0.051340, 0.051344, 0.051348, 0.051352, 0.051356, 0.051360, 0.051364, 0.051368, 0.051372, 0.051376, 0.051380, 0.051384, 0.051388, 0.051391, 0.051395, 0.051399, 0.051402, 0.051406, 0.051409, 0.051412, 0.051416, 0.051419, 0.051422, 0.051425, 0.051429, 0.051432, 0.051435, 0.051437, 0.051440, 0.051443, 0.051446, 0.051448, 0.051450, 0.051453, 0.051455, 0.051457, 0.051459, 0.051461, 0.051463, 0.051465, 0.051467, 0.051468, 0.051470, 0.051472, 0.051473, 0.051474, 0.051475, 0.051476, 0.051477, 0.051478, 0.051479, 0.051480, 0.051480, 0.051480, 0.051481, 0.051481, 0.051481, 0.051481, 0.051481, 0.051481, 0.051480, 0.051480, 0.051479, 0.051479, 0.051478, 0.051477, 0.051476, 0.051475, 0.051474, 0.051473, 0.051472, 0.051470, 0.051469, 0.051467, 0.051465, 0.051463, 0.051461, 0.051459, 0.051457, 0.051455, 0.051452, 0.051450, 0.051447, 0.051444, 0.051442, 0.051439, 0.051436, 0.051433, 0.051429, 0.051426, 0.051423, 0.051419, 0.051416, 0.051412, 0.051408, 0.051404, 0.051400, 0.051396, 0.051392, 0.051388, 0.051383, 0.051379, 0.051374, 0.051370, 0.051365, 0.051360, 0.051355, 0.051350, 0.051345, 0.051340, 0.051335, 0.051330, 0.051324, 0.051319, 0.051314, 0.051308, 0.051303, 0.051297, 0.051291, 0.051286, 0.051280, 0.051274, 0.051268, 0.051262, 0.051256, 0.051251, 0.051245, 0.051239, 0.051232, 0.051226, 0.051220, 0.051214, 0.051208, 0.051201, 0.051195, 0.051189, 0.051182, 0.051176, 0.051169, 0.051163, 0.051156, 0.051150, 0.051143, 0.051137, 0.051130, 0.051124, 0.051118, 0.051111, 0.051105, 0.051098, 0.051092, 0.051085, 0.051079, 0.051072, 0.051066, 0.051059, 0.051053, 0.051047, 0.051041, 0.051034, 0.051028, 0.051022, 0.051016, 0.051009, 0.051003, 0.050997, 0.050991, 0.050985, 0.050979, 0.050973, 0.050967, 0.050961, 0.050955, 0.050950, 0.050944, 0.050938, 0.050933, 0.050927, 0.050922, 0.050916, 0.050911, 0.050906, 0.050901, 0.050895, 0.050890, 0.050885, 0.050880, 0.050875, 0.050870, 0.050866, 0.050861, 0.050856, 0.050851, 0.050847, 0.050842, 0.050838, 0.050834, 0.050829, 0.050825, 0.050821, 0.050817, 0.050813, 0.050809, 0.050805, 0.050801, 0.050797, 0.050793, 0.050790, 0.050786, 0.050782, 0.050779, 0.050776, 0.050772, 0.050769, 0.050766, 0.050762, 0.050759, 0.050756, 0.050753, 0.050750, 0.050747, 0.050744, 0.050741, 0.050739, 0.050736, 0.050733, 0.050730, 0.050728, 0.050725, 0.050723, 0.050720, 0.050718, 0.050716, 0.050713, 0.050711, 0.050709, 0.050707, 0.050704, 0.050702, 0.050700, 0.050698, 0.050695, 0.050693, 0.050691, 0.050689, 0.050687, 0.050685, 0.050682, 0.050680, 0.050678, 0.050676, 0.050674, 0.050672, 0.050670, 0.050667, 0.050665, 0.050663, 0.050661, 0.050659, 0.050657, 0.050654, 0.050652, 0.050650, 0.050647, 0.050645, 0.050642, 0.050640, 0.050637, 0.050634, 0.050632, 0.050629, 0.050626, 0.050623, 0.050620, 0.050617, 0.050614, 0.050611, 0.050608, 0.050605, 0.050602, 0.050598, 0.050595, 0.050591, 0.050588, 0.050584, 0.050580, 0.050576, 0.050572, 0.050568, 0.050564, 0.050560, 0.050556, 0.050551, 0.050547, 0.050542, 0.050537, 0.050533, 0.050528, 0.050523, 0.050518, 0.050513, 0.050508, 0.050502, 0.050497, 0.050491, 0.050486, 0.050480, 0.050474, 0.050468, 0.050462, 0.050456, 0.050450, 0.050443, 0.050437, 0.050430, 0.050424, 0.050417, 0.050410, 0.050402, 0.050395, 0.050388, 0.050381, 0.050373, 0.050366, 0.050358, 0.050350, 0.050343, 0.050335, 0.050327, 0.050318, 0.050310, 0.050302, 0.050294, 0.050285, 0.050276, 0.050268, 0.050259, 0.050250, 0.050241, 0.050232, 0.050223, 0.050213, 0.050204, 0.050194, 0.050185, 0.050175, 0.050166, 0.050156, 0.050146, 0.050136, 0.050127, 0.050117, 0.050106, 0.050096, 0.050086, 0.050076, 0.050065, 0.050055, 0.050044, 0.050033, 0.050023, 0.050012, 0.050001, 0.049991, 0.049980, 0.049969, 0.049958, 0.049947, 0.049936, 0.049925, 0.049914, 0.049903, 0.049892, 0.049880, 0.049869, 0.049858, 0.049847, 0.049835, 0.049824, 0.049813, 0.049802, 0.049790, 0.049779, 0.049768, 0.049756, 0.049745, 0.049733, 0.049722, 0.049711, 0.049699, 0.049688, 0.049676, 0.049665, 0.049653, 0.049642, 0.049630, 0.049619, 0.049608, 0.049596, 0.049585, 0.049573, 0.049562, 0.049551, 0.049539, 0.049528, 0.049517, 0.049506, 0.049494, 0.049483, 0.049472, 0.049461, 0.049450, 0.049439, 0.049428, 0.049417, 0.049406, 0.049395, 0.049384, 0.049373, 0.049362, 0.049351, 0.049340, 0.049329, 0.049319, 0.049308, 0.049297, 0.049287, 0.049276, 0.049266, 0.049255, 0.049245, 0.049234, 0.049224, 0.049214, 0.049203, 0.049193, 0.049183, 0.049173, 0.049162, 0.049152, 0.049142, 0.049132, 0.049122, 0.049112, 0.049102, 0.049092, 0.049082, 0.049073, 0.049063, 0.049053, 0.049043, 0.049033, 0.049024, 0.049014, 0.049005, 0.048995, 0.048986, 0.048976, 0.048967, 0.048957, 0.048948, 0.048939, 0.048929, 0.048920, 0.048911, 0.048902, 0.048893, 0.048884, 0.048875, 0.048866, 0.048857, 0.048848, 0.048839, 0.048830, 0.048821, 0.048812, 0.048804, 0.048795, 0.048786, 0.048778, 0.048769, 0.048760, 0.048752, 0.048743, 0.048735, 0.048726, 0.048718, 0.048709, 0.048701, 0.048693, 0.048684, 0.048676, 0.048668, 0.048659, 0.048651, 0.048643, 0.048634, 0.048626, 0.048618, 0.048610, 0.048602, 0.048593, 0.048585, 0.048577, 0.048569, 0.048561, 0.048553, 0.048545, 0.048537, 0.048529, 0.048521, 0.048514, 0.048506, 0.048498, 0.048490, 0.048482, 0.048474, 0.048466, 0.048458, 0.048450, 0.048443, 0.048435, 0.048427, 0.048419, 0.048412, 0.048404, 0.048396, 0.048388, 0.048381, 0.048373, 0.048366, 0.048358, 0.048351, 0.048343, 0.048336, 0.048328, 0.048320, 0.048313, 0.048305, 0.048298, 0.048290, 0.048283, 0.048275, 0.048268, 0.048261, 0.048253, 0.048246, 0.048239, 0.048231, 0.048224, 0.048217, 0.048210, 0.048203, 0.048195, 0.048188, 0.048181, 0.048174, 0.048167, 0.048160, 0.048153, 0.048146, 0.048139, 0.048132, 0.048125, 0.048118, 0.048112, 0.048105, 0.048098, 0.048091, 0.048085, 0.048078, 0.048072, 0.048065, 0.048059, 0.048052, 0.048046, 0.048040, 0.048034, 0.048028, 0.048022, 0.048016, 0.048010, 0.048004, 0.047998, 0.047992, 0.047986, 0.047981, 0.047975, 0.047970, 0.047964, 0.047959, 0.047954, 0.047949, 0.047943, 0.047938, 0.047933, 0.047929, 0.047924, 0.047919, 0.047915, 0.047910, 0.047906, 0.047902, 0.047897, 0.047893, 0.047889, 0.047885, 0.047882, 0.047878, 0.047875, 0.047871, 0.047868, 0.047865, 0.047862, 0.047859, 0.047856, 0.047854, 0.047851, 0.047849, 0.047846, 0.047844, 0.047842, 0.047840, 0.047839, 0.047837, 0.047835, 0.047834, 0.047833, 0.047832, 0.047831, 0.047830, 0.047829, 0.047828, 0.047828, 0.047828, 0.047828, 0.047828, 0.047828, 0.047829, 0.047829, 0.047830, 0.047831, 0.047832, 0.047833, 0.047834, 0.047836, 0.047837, 0.047839, 0.047841, 0.047843, 0.047845, 0.047847, 0.047850, 0.047853, 0.047856, 0.047858, 0.047861, 0.047865, 0.047868, 0.047872, 0.047876, 0.047880, 0.047884, 0.047888, 0.047892, 0.047897, 0.047901, 0.047906, 0.047911, 0.047916, 0.047921, 0.047926, 0.047932, 0.047937, 0.047943, 0.047949, 0.047955, 0.047961, 0.047967, 0.047974, 0.047980, 0.047987, 0.047994, 0.048001, 0.048008, 0.048014, 0.048022, 0.048029, 0.048036, 0.048044, 0.048051, 0.048059, 0.048067, 0.048075, 0.048083, 0.048091, 0.048099, 0.048107, 0.048115, 0.048124, 0.048132, 0.048140, 0.048149, 0.048158, 0.048166, 0.048175, 0.048184, 0.048192, 0.048201, 0.048210, 0.048219, 0.048228, 0.048237, 0.048246, 0.048254, 0.048264, 0.048273, 0.048282, 0.048291, 0.048300, 0.048309, 0.048318, 0.048327, 0.048336, 0.048346, 0.048355, 0.048364, 0.048373, 0.048382, 0.048391, 0.048400, 0.048408, 0.048417, 0.048426, 0.048435, 0.048444, 0.048453, 0.048461, 0.048470, 0.048478, 0.048487, 0.048495, 0.048504, 0.048512, 0.048520, 0.048528, 0.048536, 0.048544, 0.048552, 0.048560, 0.048568, 0.048576, 0.048583, 0.048591, 0.048598, 0.048605, 0.048612, 0.048620, 0.048627, 0.048634, 0.048640, 0.048647, 0.048653, 0.048660, 0.048666, 0.048673, 0.048679, 0.048685, 0.048690, 0.048696, 0.048702, 0.048707, 0.048713, 0.048718, 0.048723, 0.048728, 0.048733, 0.048737, 0.048742, 0.048746, 0.048751, 0.048755, 0.048759, 0.048762, 0.048766, 0.048770, 0.048773, 0.048777, 0.048780, 0.048783, 0.048786, 0.048789, 0.048791, 0.048794, 0.048796, 0.048798, 0.048800, 0.048802, 0.048804, 0.048805, 0.048807, 0.048808, 0.048809, 0.048810, 0.048811, 0.048812, 0.048812, 0.048813, 0.048813, 0.048813, 0.048813, 0.048813, 0.048813, 0.048813, 0.048812, 0.048812, 0.048811, 0.048810, 0.048809, 0.048807, 0.048806, 0.048804, 0.048803, 0.048801, 0.048798, 0.048796, 0.048794, 0.048792, 0.048789, 0.048786, 0.048784, 0.048781, 0.048778, 0.048774, 0.048771, 0.048767, 0.048764, 0.048760, 0.048756, 0.048752, 0.048748, 0.048743, 0.048739, 0.048734, 0.048729, 0.048724, 0.048719, 0.048714, 0.048709, 0.048704, 0.048698, 0.048693, 0.048687, 0.048681, 0.048675, 0.048669, 0.048663, 0.048656, 0.048650, 0.048643, 0.048636, 0.048630, 0.048623, 0.048615, 0.048608, 0.048601, 0.048593, 0.048586, 0.048578, 0.048570, 0.048562, 0.048554, 0.048546, 0.048538, 0.048529, 0.048521, 0.048512, 0.048503, 0.048494, 0.048486, 0.048477, 0.048467, 0.048458, 0.048449, 0.048439, 0.048430, 0.048420, 0.048410, 0.048400, 0.048390, 0.048380, 0.048370, 0.048359, 0.048349, 0.048338, 0.048328, 0.048317, 0.048306, 0.048295, 0.048284, 0.048273, 0.048261, 0.048250, 0.048239, 0.048227, 0.048215, 0.048203, 0.048192, 0.048180, 0.048168, 0.048156, 0.048143, 0.048131, 0.048119, 0.048106, 0.048093, 0.048081, 0.048068, 0.048055, 0.048042, 0.048029, 0.048016, 0.048002, 0.047989, 0.047976, 0.047962, 0.047949, 0.047935, 0.047921, 0.047907, 0.047894, 0.047880, 0.047866, 0.047852, 0.047837, 0.047823, 0.047809, 0.047794, 0.047780, 0.047766, 0.047751, 0.047736, 0.047721, 0.047707, 0.047692, 0.047677, 0.047662, 0.047647, 0.047632, 0.047617, 0.047602, 0.047586, 0.047571, 0.047556, 0.047540, 0.047524, 0.047509, 0.047493, 0.047478, 0.047462, 0.047446, 0.047430, 0.047414, 0.047399, 0.047383, 0.047367, 0.047351, 0.047335, 0.047319, 0.047303, 0.047287, 0.047271, 0.047255, 0.047239, 0.047223, 0.047206, 0.047190, 0.047174, 0.047158, 0.047141, 0.047125, 0.047109, 0.047093, 0.047077, 0.047061, 0.047044, 0.047028, 0.047012, 0.046996, 0.046980, 0.046964, 0.046948, 0.046931, 0.046915, 0.046899, 0.046883, 0.046867, 0.046851, 0.046835, 0.046819, 0.046803, 0.046787, 0.046772, 0.046756, 0.046740, 0.046724, 0.046709, 0.046693, 0.046678, 0.046662, 0.046646, 0.046631, 0.046616, 0.046601, 0.046585, 0.046570, 0.046555, 0.046540, 0.046525, 0.046510, 0.046495, 0.046481, 0.046466, 0.046451, 0.046437, 0.046422, 0.046408, 0.046394, 0.046380, 0.046366, 0.046352, 0.046338, 0.046324, 0.046310, 0.046297, 0.046283, 0.046270, 0.046256, 0.046243, 0.046230, 0.046217, 0.046204, 0.046192, 0.046179, 0.046166, 0.046154, 0.046142, 0.046130, 0.046118, 0.046106, 0.046094, 0.046082, 0.046071, 0.046059, 0.046048, 0.046037, 0.046026, 0.046015, 0.046004, 0.045993, 0.045983, 0.045973, 0.045962, 0.045952, 0.045942, 0.045932, 0.045922, 0.045913, 0.045903, 0.045894, 0.045884, 0.045875, 0.045866, 0.045858, 0.045849, 0.045840, 0.045832, 0.045823, 0.045815, 0.045807, 0.045799, 0.045791, 0.045784, 0.045776, 0.045769, 0.045762, 0.045754, 0.045748, 0.045741, 0.045734, 0.045727, 0.045721, 0.045715, 0.045708, 0.045702, 0.045697, 0.045691, 0.045685, 0.045680, 0.045674, 0.045669, 0.045664, 0.045659, 0.045655, 0.045650, 0.045645, 0.045641, 0.045637, 0.045633, 0.045629, 0.045625, 0.045621, 0.045618, 0.045614, 0.045611, 0.045608, 0.045605, 0.045602, 0.045599, 0.045596, 0.045594, 0.045591, 0.045589, 0.045587, 0.045585, 0.045583, 0.045581, 0.045580, 0.045578, 0.045577, 0.045576, 0.045575, 0.045574, 0.045573, 0.045572, 0.045571, 0.045571, 0.045570, 0.045570, 0.045570, 0.045570, 0.045570, 0.045570, 0.045570, 0.045570, 0.045571, 0.045572, 0.045573, 0.045573, 0.045574, 0.045576, 0.045577, 0.045578, 0.045580, 0.045581, 0.045583, 0.045585, 0.045587, 0.045589, 0.045591, 0.045593, 0.045595, 0.045598, 0.045600, 0.045603, 0.045606, 0.045609, 0.045612, 0.045615, 0.045618, 0.045622, 0.045625, 0.045629, 0.045633, 0.045636, 0.045640, 0.045644, 0.045648, 0.045652, 0.045657, 0.045661, 0.045665, 0.045669, 0.045674, 0.045679, 0.045683, 0.045688, 0.045693, 0.045698, 0.045703, 0.045708, 0.045713, 0.045719, 0.045724, 0.045729, 0.045735, 0.045741, 0.045746, 0.045752, 0.045758, 0.045764, 0.045770, 0.045776, 0.045782, 0.045788, 0.045794, 0.045800, 0.045806, 0.045812, 0.045819, 0.045825, 0.045831, 0.045838, 0.045844, 0.045851, 0.045857, 0.045864, 0.045870, 0.045877, 0.045883, 0.045890, 0.045896, 0.045903, 0.045910, 0.045916, 0.045923, 0.045929, 0.045936, 0.045943, 0.045949, 0.045956, 0.045963, 0.045969, 0.045976, 0.045983, 0.045989, 0.045996, 0.046002, 0.046009, 0.046015, 0.046022, 0.046028, 0.046034, 0.046040, 0.046047, 0.046053, 0.046059, 0.046065, 0.046071, 0.046077, 0.046083, 0.046089, 0.046095, 0.046100, 0.046106, 0.046112, 0.046117, 0.046123, 0.046128, 0.046133, 0.046138, 0.046143, 0.046148, 0.046153, 0.046158, 0.046163, 0.046168, 0.046172, 0.046177, 0.046181, 0.046186, 0.046190, 0.046194, 0.046198, 0.046202, 0.046206, 0.046209, 0.046213, 0.046216, 0.046220, 0.046223, 0.046226, 0.046229, 0.046232, 0.046234, 0.046237, 0.046239, 0.046241, 0.046244, 0.046246, 0.046247, 0.046249, 0.046251, 0.046252, 0.046253, 0.046255, 0.046256, 0.046257, 0.046258, 0.046258, 0.046259, 0.046259, 0.046260, 0.046260, 0.046260, 0.046259, 0.046259, 0.046259, 0.046258, 0.046257, 0.046256, 0.046255, 0.046254, 0.046253, 0.046251, 0.046250, 0.046248, 0.046246, 0.046244, 0.046242, 0.046240, 0.046237, 0.046235, 0.046232, 0.046230, 0.046227, 0.046224, 0.046220, 0.046217, 0.046214, 0.046210, 0.046207, 0.046203, 0.046199, 0.046195, 0.046191, 0.046186, 0.046182, 0.046178, 0.046173, 0.046168, 0.046164, 0.046159, 0.046154, 0.046148, 0.046143, 0.046138, 0.046132, 0.046127, 0.046121, 0.046115, 0.046110, 0.046104, 0.046098, 0.046092, 0.046086, 0.046080, 0.046073, 0.046067, 0.046061, 0.046054, 0.046048, 0.046041, 0.046034, 0.046028, 0.046021, 0.046014, 0.046008, 0.046001, 0.045994, 0.045987, 0.045980, 0.045973, 0.045966, 0.045959, 0.045952, 0.045944, 0.045937, 0.045930, 0.045923, 0.045915, 0.045908, 0.045901, 0.045894, 0.045887, 0.045879, 0.045872, 0.045865, 0.045858, 0.045851, 0.045843, 0.045836, 0.045829, 0.045821, 0.045814, 0.045807, 0.045800, 0.045793, 0.045786, 0.045779, 0.045772, 0.045765, 0.045758, 0.045751, 0.045744, 0.045737, 0.045731, 0.045724, 0.045717, 0.045711, 0.045704, 0.045698, 0.045691, 0.045685, 0.045678, 0.045672, 0.045666, 0.045659, 0.045653, 0.045647, 0.045641, 0.045635, 0.045629, 0.045623, 0.045618, 0.045612, 0.045606, 0.045601, 0.045595, 0.045590, 0.045584, 0.045579, 0.045574, 0.045569, 0.045564, 0.045558, 0.045553, 0.045548, 0.045544, 0.045539, 0.045534, 0.045529, 0.045524, 0.045520, 0.045515, 0.045511, 0.045506, 0.045502, 0.045498, 0.045493, 0.045489, 0.045485, 0.045481, 0.045477, 0.045473, 0.045469, 0.045465, 0.045461, 0.045458, 0.045454, 0.045450, 0.045447, 0.045443, 0.045440, 0.045436, 0.045433, 0.045429, 0.045426, 0.045422, 0.045419, 0.045416, 0.045413, 0.045410, 0.045406, 0.045403, 0.045400, 0.045397, 0.045394, 0.045391, 0.045388, 0.045385, 0.045382, 0.045379, 0.045376, 0.045373, 0.045370, 0.045367, 0.045364, 0.045361, 0.045358, 0.045356, 0.045353, 0.045350, 0.045347, 0.045344, 0.045341, 0.045338, 0.045335, 0.045332, 0.045329, 0.045327, 0.045324, 0.045321, 0.045318, 0.045315, 0.045312, 0.045309, 0.045306, 0.045303, 0.045300, 0.045297, 0.045294, 0.045291, 0.045288, 0.045285, 0.045282, 0.045279, 0.045275, 0.045272, 0.045269, 0.045266, 0.045263, 0.045260, 0.045256, 0.045253, 0.045250, 0.045246, 0.045243, 0.045240, 0.045236, 0.045233, 0.045230, 0.045226, 0.045223, 0.045219, 0.045216, 0.045213, 0.045209, 0.045205, 0.045202, 0.045198, 0.045195, 0.045191, 0.045188, 0.045184, 0.045181, 0.045177, 0.045173, 0.045170, 0.045166, 0.045163, 0.045159, 0.045155, 0.045152, 0.045148, 0.045144, 0.045141, 0.045137, 0.045133, 0.045130, 0.045126, 0.045122, 0.045119, 0.045115, 0.045112, 0.045108, 0.045105, 0.045101, 0.045097, 0.045094, 0.045091, 0.045087, 0.045084, 0.045080, 0.045077, 0.045073, 0.045070, 0.045066, 0.045063, 0.045059, 0.045056, 0.045053, 0.045050, 0.045046, 0.045043, 0.045040, 0.045037, 0.045034, 0.045030, 0.045027, 0.045024, 0.045021, 0.045018, 0.045015, 0.045012, 0.045009, 0.045006, 0.045004, 0.045001, 0.044998, 0.044995, 0.044992, 0.044990, 0.044987, 0.044985, 0.044982, 0.044979, 0.044977, 0.044974, 0.044972, 0.044969, 0.044967, 0.044965, 0.044962, 0.044960, 0.044958, 0.044955, 0.044953, 0.044951, 0.044949, 0.044947, 0.044945, 0.044943, 0.044941, 0.044939, 0.044937, 0.044935, 0.044933, 0.044932, 0.044930, 0.044928, 0.044926, 0.044925, 0.044923, 0.044921, 0.044920, 0.044918, 0.044917, 0.044915, 0.044913, 0.044912, 0.044910, 0.044909, 0.044907, 0.044906, 0.044904, 0.044903, 0.044902, 0.044900, 0.044899, 0.044898, 0.044896, 0.044895, 0.044894, 0.044893, 0.044892, 0.044890, 0.044889, 0.044888, 0.044887, 0.044886, 0.044884, 0.044883, 0.044882, 0.044881, 0.044880, 0.044879, 0.044878, 0.044876, 0.044875, 0.044874, 0.044873, 0.044872, 0.044870, 0.044869, 0.044868, 0.044866, 0.044865, 0.044864, 0.044863, 0.044862, 0.044860, 0.044859, 0.044858, 0.044856, 0.044855, 0.044854, 0.044852, 0.044851, 0.044849, 0.044848, 0.044847, 0.044845, 0.044844, 0.044842, 0.044841, 0.044839, 0.044837, 0.044836, 0.044834, 0.044832, 0.044831, 0.044829, 0.044827, 0.044825, 0.044824, 0.044822, 0.044820, 0.044818, 0.044816, 0.044814, 0.044812, 0.044811, 0.044808, 0.044806, 0.044804, 0.044802, 0.044800, 0.044798, 0.044796, 0.044793, 0.044791, 0.044789, 0.044786, 0.044784, 0.044781, 0.044779, 0.044776, 0.044774, 0.044771, 0.044769, 0.044766, 0.044763, 0.044761, 0.044758, 0.044755, 0.044752, 0.044750, 0.044747, 0.044744, 0.044741, 0.044738, 0.044735, 0.044732, 0.044729, 0.044726, 0.044723, 0.044720, 0.044717, 0.044714, 0.044711, 0.044708, 0.044705, 0.044701, 0.044698, 0.044695, 0.044692, 0.044689, 0.044685, 0.044682, 0.044679, 0.044676, 0.044673, 0.044669, 0.044666, 0.044663, 0.044660, 0.044656, 0.044653, 0.044650, 0.044647, 0.044644, 0.044641, 0.044638, 0.044635, 0.044632, 0.044629, 0.044626, 0.044623, 0.044620, 0.044617, 0.044614, 0.044611, 0.044608, 0.044606, 0.044603, 0.044600, 0.044598, 0.044595, 0.044593, 0.044590, 0.044588, 0.044585, 0.044583, 0.044581, 0.044578, 0.044576, 0.044574, 0.044572, 0.044570, 0.044568, 0.044566, 0.044565, 0.044563, 0.044561, 0.044560, 0.044558, 0.044557, 0.044555, 0.044554, 0.044553, 0.044552, 0.044551, 0.044550, 0.044549, 0.044549, 0.044548, 0.044548, 0.044547, 0.044547, 0.044547, 0.044547, 0.044547, 0.044547, 0.044547, 0.044547, 0.044548, 0.044548, 0.044549, 0.044550, 0.044551, 0.044552, 0.044553, 0.044554, 0.044556, 0.044557, 0.044558, 0.044560, 0.044562, 0.044563, 0.044566, 0.044568, 0.044570, 0.044572, 0.044574, 0.044577, 0.044580, 0.044582, 0.044585, 0.044588, 0.044591, 0.044594, 0.044597, 0.044600, 0.044604, 0.044607, 0.044611, 0.044615, 0.044618
0.033918, 0.033925, 0.033933, 0.033940, 0.033948, 0.033956, 0.033963, 0.033971, 0.033979, 0.033986, 0.033994, 0.034002, 0.034010, 0.034018, 0.034026, 0.034034, 0.034042, 0.034050, 0.034058, 0.034067, 0.034075, 0.034083, 0.034092, 0.034100, 0.034108, 0.034117, 0.034125, 0.034134, 0.034142, 0.034151, 0.034160, 0.034169, 0.034178, 0.034186, 0.034195, 0.034204, 0.034213, 0.034222, 0.034231, 0.034240, 0.034249, 0.034258, 0.034267, 0.034277, 0.034286, 0.034295, 0.034305, 0.034314, 0.034323, 0.034332, 0.034342, 0.034351, 0.034361, 0.034370, 0.034380, 0.034389, 0.034399, 0.034408, 0.034418, 0.034427, 0.034437, 0.034447, 0.034456, 0.034466, 0.034476, 0.034485, 0.034495, 0.034504, 0.034514, 0.034524, 0.034533, 0.034543, 0.034553, 0.034562, 0.034572, 0.034581, 0.034591, 0.034600, 0.034610, 0.034619, 0.034629, 0.034638, 0.034647, 0.034657, 0.034666, 0.034675, 0.034684, 0.034693, 0.034702, 0.034711, 0.034720, 0.034729, 0.034738, 0.034747, 0.034755, 0.034764, 0.034772, 0.034781, 0.034789, 0.034797, 0.034805, 0.034814, 0.034822, 0.034829, 0.034837, 0.034845, 0.034853, 0.034860, 0.034867, 0.034875, 0.034882, 0.034889, 0.034896, 0.034903, 0.034909, 0.034916, 0.034922, 0.034929, 0.034935, 0.034941, 0.034947, 0.034953, 0.034958, 0.034964, 0.034969, 0.034974, 0.034979, 0.034984, 0.034989, 0.034993, 0.034998, 0.035002, 0.035006, 0.035010, 0.035014, 0.035018, 0.035021, 0.035024, 0.035028, 0.035031, 0.035034, 0.035036, 0.035039, 0.035041, 0.035044, 0.035046, 0.035048, 0.035049, 0.035051, 0.035053, 0.035054, 0.035055, 0.035056, 0.035057, 0.035057, 0.035058, 0.035058, 0.035058, 0.035058, 0.035058, 0.035057, 0.035056, 0.035056, 0.035055, 0.035054, 0.035052, 0.035051, 0.035049, 0.035047, 0.035045, 0.035043, 0.035041, 0.035039, 0.035036, 0.035033, 0.035031, 0.035028, 0.035024, 0.035021, 0.035017, 0.035014, 0.035010, 0.035006, 0.035001, 0.034997, 0.034993, 0.034988, 0.034983, 0.034978, 0.034973, 0.034968, 0.034963, 0.034957, 0.034952, 0.034946, 0.034940, 0.034934, 0.034928, 0.034922, 0.034915, 0.034908, 0.034902, 0.034895, 0.034888, 0.034881, 0.034874, 0.034866, 0.034859, 0.034851, 0.034844, 0.034836, 0.034828, 0.034820, 0.034811, 0.034803, 0.034794, 0.034786, 0.034777, 0.034769, 0.034760, 0.034751, 0.034742, 0.034733, 0.034724, 0.034715, 0.034705, 0.034696, 0.034686, 0.034676, 0.034667, 0.034657, 0.034647, 0.034637, 0.034627, 0.034616, 0.034606, 0.034596, 0.034585, 0.034575, 0.034564, 0.034553, 0.034542, 0.034532, 0.034521, 0.034510, 0.034499, 0.034487, 0.034476, 0.034465, 0.034454, 0.034442, 0.034431, 0.034419, 0.034407, 0.034396, 0.034384, 0.034372, 0.034361, 0.034349, 0.034337, 0.034325, 0.034313, 0.034300, 0.034288, 0.034276, 0.034264, 0.034251, 0.034239, 0.034226, 0.034214, 0.034202, 0.034189, 0.034177, 0.034164, 0.034151, 0.034139, 0.034126, 0.034114, 0.034101, 0.034088, 0.034075, 0.034062, 0.034050, 0.034037, 0.034024, 0.034011, 0.033998, 0.033985, 0.033972, 0.033960, 0.033947, 0.033934, 0.033921, 0.033908, 0.033895, 0.033882, 0.033870, 0.033857, 0.033844, 0.033831, 0.033818, 0.033805, 0.033792, 0.033780, 0.033767, 0.033755, 0.033742, 0.033729, 0.033717, 0.033704, 0.033692, 0.033679, 0.033667, 0.033655, 0.033642, 0.033630, 0.033618, 0.033606, 0.033594, 0.033582, 0.033570, 0.033558, 0.033547, 0.033535, 0.033524, 0.033512, 0.033501, 0.033490, 0.033478, 0.033467, 0.033456, 0.033446, 0.033435, 0.033424, 0.033414, 0.033404, 0.033393, 0.033383, 0.033373, 0.033363, 0.033353, 0.033344, 0.033335, 0.033325, 0.033316, 0.033307, 0.033298, 0.033290, 0.033282, 0.033273, 0.033265, 0.033258, 0.033250, 0.033242, 0.033235, 0.033228, 0.033221, 0.033214, 0.033208, 0.033201, 0.033195, 0.033189, 0.033184, 0.033178, 0.033173, 0.033168, 0.033163, 0.033158, 0.033154, 0.033150, 0.033146, 0.033143, 0.033139, 0.033136, 0.033133, 0.033131, 0.033129, 0.033126, 0.033125, 0.033123, 0.033122, 0.033121, 0.033120, 0.033119, 0.033119, 0.033119, 0.033120, 0.033120, 0.033121, 0.033123, 0.033124, 0.033126, 0.033128, 0.033130, 0.033133, 0.033136, 0.033140, 0.033143, 0.033147, 0.033151, 0.033156, 0.033160, 0.033165, 0.033171, 0.033176, 0.033182, 0.033188, 0.033195, 0.033201, 0.033209, 0.033216, 0.033224, 0.033232, 0.033240, 0.033249, 0.033258, 0.033267, 0.033277, 0.033286, 0.033297, 0.033307, 0.033318, 0.033329, 0.033340, 0.033351, 0.033363, 0.033375, 0.033388, 0.033400, 0.033413, 0.033427, 0.033440, 0.033454, 0.033468, 0.033482, 0.033497, 0.033512, 0.033527, 0.033542, 0.033558, 0.033573, 0.033590, 0.033606, 0.033623, 0.033639, 0.033656, 0.033674, 0.033691, 0.033709, 0.033727, 0.033745, 0.033763, 0.033782, 0.033801, 0.033820, 0.033839, 0.033858, 0.033878, 0.033897, 0.033917, 0.033938, 0.033958, 0.033979, 0.033999, 0.034020, 0.034041, 0.034062, 0.034084, 0.034105, 0.034127, 0.034149, 0.034170, 0.034192, 0.034214, 0.034237, 0.034259, 0.034281, 0.034304, 0.034327, 0.034349, 0.034372, 0.034395, 0.034419, 0.034442, 0.034465, 0.034488, 0.034512, 0.034535, 0.034559, 0.034582, 0.034606, 0.034630, 0.034654, 0.034678, 0.034702, 0.034726, 0.034750, 0.034774, 0.034798, 0.034822, 0.034847, 0.034871, 0.034895, 0.034919, 0.034943, 0.034968, 0.034992, 0.035017, 0.035041, 0.035065, 0.035090, 0.035114, 0.035138, 0.035163, 0.035187, 0.035211, 0.035236, 0.035260, 0.035284, 0.035308, 0.035332, 0.035357, 0.035381, 0.035405, 0.035429, 0.035453, 0.035477, 0.035502, 0.035526, 0.035549, 0.035573, 0.035597, 0.035621, 0.035645, 0.035669, 0.035692, 0.035716, 0.035740, 0.035763, 0.035787, 0.035810, 0.035834, 0.035857, 0.035881, 0.035904, 0.035927, 0.035950, 0.035973, 0.035996, 0.036019, 0.036042, 0.036065, 0.036088, 0.036111, 0.036134, 0.036157, 0.036180, 0.036202, 0.036225, 0.036248, 0.036270, 0.036293, 0.036315, 0.036338, 0.036360, 0.036382, 0.036404, 0.036427, 0.036449, 0.036471, 0.036493, 0.036515, 0.036538, 0.036559, 0.036581, 0.036603, 0.036625, 0.036647, 0.036669, 0.036691, 0.036713, 0.036735, 0.036756, 0.036778, 0.036800, 0.036821, 0.036843, 0.036865, 0.036886, 0.036908, 0.036930, 0.036951, 0.036973, 0.036994, 0.037016, 0.037038, 0.037059, 0.037081, 0.037102, 0.037124, 0.037145, 0.037167, 0.037188, 0.037210, 0.037232, 0.037253, 0.037275, 0.037297, 0.037319, 0.037340, 0.037362, 0.037384, 0.037406, 0.037428, 0.037450, 0.037473, 0.037495, 0.037517, 0.037539, 0.037561, 0.037584, 0.037606, 0.037629, 0.037651, 0.037674, 0.037697, 0.037720, 0.037743, 0.037766, 0.037789, 0.037813, 0.037836, 0.037860, 0.037883, 0.037907, 0.037931, 0.037955, 0.037979, 0.038003, 0.038028, 0.038052, 0.038077, 0.038102, 0.038127, 0.038153, 0.038178, 0.038204, 0.038229, 0.038255, 0.038281, 0.038308, 0.038334, 0.038361, 0.038388, 0.038415, 0.038442, 0.038470, 0.038498, 0.038526, 0.038554, 0.038583, 0.038612, 0.038641, 0.038670, 0.038700, 0.038730, 0.038760, 0.038791, 0.038822, 0.038853, 0.038884, 0.038916, 0.038948, 0.038980, 0.039013, 0.039046, 0.039080, 0.039113, 0.039147, 0.039182, 0.039217, 0.039252, 0.039288, 0.039324, 0.039360, 0.039397, 0.039434, 0.039472, 0.039510, 0.039549, 0.039588, 0.039628, 0.039667, 0.039708, 0.039749, 0.039790, 0.039832, 0.039874, 0.039917, 0.039960, 0.040004, 0.040049, 0.040094, 0.040139, 0.040185, 0.040232, 0.040279, 0.040326, 0.040375, 0.040423, 0.040473, 0.040523, 0.040574, 0.040625, 0.040677, 0.040729, 0.040783, 0.040836, 0.040891, 0.040946, 0.041002, 0.041058, 0.041115, 0.041173, 0.041231, 0.041290, 0.041350, 0.041411, 0.041472, 0.041534, 0.041597, 0.041661, 0.041725, 0.041790, 0.041856, 0.041923, 0.041990, 0.042059, 0.042128, 0.042198, 0.042269, 0.042340, 0.042413, 0.042486, 0.042560, 0.042635, 0.042711, 0.042788, 0.042866, 0.042944, 0.043024, 0.043105, 0.043186, 0.043268, 0.043352, 0.043436, 0.043521, 0.043608, 0.043695, 0.043783, 0.043872, 0.043962, 0.044054, 0.044146, 0.044239, 0.044333, 0.044429, 0.044525, 0.044623, 0.044721, 0.044821, 0.044922, 0.045024, 0.045127, 0.045231, 0.045336, 0.045443, 0.045551, 0.045659, 0.045769, 0.045881, 0.045993, 0.046106, 0.046221, 0.046337, 0.046455, 0.046573, 0.046693, 0.046814, 0.046936, 0.047060, 0.047185, 0.047311, 0.047438, 0.047567, 0.047697, 0.047828, 0.047961, 0.048095, 0.048231, 0.048368, 0.048506, 0.048646, 0.048787, 0.048929, 0.049073, 0.049218, 0.049365, 0.049513, 0.049662, 0.049813, 0.049966, 0.050120, 0.050275, 0.050432, 0.050591, 0.050751, 0.050912, 0.051075, 0.051240, 0.051406, 0.051574, 0.051743, 0.051914, 0.052087, 0.052261, 0.052437, 0.052614, 0.052793, 0.052973, 0.053155, 0.053339, 0.053525, 0.053712, 0.053900, 0.054091, 0.054283, 0.054477, 0.054672, 0.054870, 0.055068, 0.055269, 0.055472, 0.055676, 0.055881, 0.056089, 0.056298, 0.056509, 0.056722, 0.056936, 0.057152, 0.057370, 0.057590, 0.057812, 0.058035, 0.058260, 0.058487, 0.058716, 0.058946, 0.059179, 0.059413, 0.059649, 0.059886, 0.060126, 0.060367, 0.060610, 0.060855, 0.061102, 0.061350, 0.061601, 0.061853, 0.062107, 0.062363, 0.062621, 0.062880, 0.063141, 0.063405, 0.063669, 0.063936, 0.064205, 0.064475, 0.064747, 0.065021, 0.065297, 0.065574, 0.065854, 0.066135, 0.066418, 0.066703, 0.066989, 0.067278, 0.067568, 0.067859, 0.068153, 0.068448, 0.068746, 0.069045, 0.069345, 0.069647, 0.069951, 0.070257, 0.070564, 0.070873, 0.071184, 0.071497, 0.071811, 0.072126, 0.072444, 0.072763, 0.073084, 0.073406, 0.073730, 0.074056, 0.074383, 0.074712, 0.075042, 0.075374, 0.075707, 0.076043, 0.076379, 0.076717, 0.077057, 0.077398, 0.077740, 0.078084, 0.078429, 0.078776, 0.079124, 0.079474, 0.079825, 0.080177, 0.080531, 0.080886, 0.081242, 0.081600, 0.081959, 0.082319, 0.082681, 0.083044, 0.083408, 0.083773, 0.084140, 0.084507, 0.084876, 0.085246, 0.085617, 0.085989, 0.086362, 0.086736, 0.087111, 0.087488, 0.087865, 0.088243, 0.088622, 0.089002, 0.089384, 0.089766, 0.090148, 0.090532, 0.090917, 0.091302, 0.091688, 0.092076, 0.092463, 0.092852, 0.093241, 0.093631, 0.094022, 0.094413, 0.094805, 0.095198, 0.095591, 0.095985, 0.096379, 0.096774, 0.097169, 0.097565, 0.097962, 0.098358, 0.098756, 0.099153, 0.099551, 0.099950, 0.100348, 0.100748, 0.101147, 0.101547, 0.101946, 0.102347, 0.102747, 0.103147, 0.103548, 0.103949, 0.104350, 0.104750, 0.105152, 0.105553, 0.105954, 0.106355, 0.106757, 0.107158, 0.107559, 0.107960, 0.108361, 0.108762, 0.109163, 0.109564, 0.109964, 0.110365, 0.110765, 0.111165, 0.111564, 0.111964, 0.112363, 0.112761, 0.113160, 0.113558, 0.113955, 0.114353, 0.114749, 0.115146, 0.115542, 0.115937, 0.116332, 0.116727, 0.117121, 0.117514, 0.117907, 0.118299, 0.118691, 0.119082, 0.119472, 0.119861, 0.120250, 0.120639, 0.121026, 0.121413, 0.121799, 0.122184, 0.122568, 0.122952, 0.123335, 0.123716, 0.124097, 0.124477, 0.124856, 0.125234, 0.125611, 0.125988, 0.126363, 0.126737, 0.127110, 0.127482, 0.127853, 0.128224, 0.128593, 0.128960, 0.129327, 0.129693, 0.130057, 0.130420, 0.130782, 0.131143, 0.131502, 0.131861, 0.132217, 0.132573, 0.132927, 0.133280, 0.133632, 0.133983, 0.134332, 0.134679, 0.135025, 0.135370, 0.135713, 0.136055, 0.136396, 0.136734, 0.137072, 0.137408, 0.137742, 0.138075, 0.138406, 0.138736, 0.139064, 0.139391, 0.139715, 0.140039, 0.140360, 0.140680, 0.140998, 0.141315, 0.141630, 0.141943, 0.142254, 0.142564, 0.142871, 0.143177, 0.143481, 0.143784, 0.144084, 0.144383, 0.144680, 0.144975, 0.145268, 0.145560, 0.145849, 0.146136, 0.146422, 0.146705, 0.146986, 0.147266, 0.147543, 0.147819, 0.148092, 0.148364, 0.148633, 0.148901, 0.149166, 0.149429, 0.149691, 0.149950, 0.150207, 0.150462, 0.150714, 0.150965, 0.151214, 0.151460, 0.151704, 0.151946, 0.152185, 0.152423, 0.152658, 0.152891, 0.153122, 0.153350, 0.153576, 0.153800, 0.154022, 0.154241, 0.154459, 0.154674, 0.154886, 0.155096, 0.155304, 0.155510, 0.155713, 0.155914, 0.156112, 0.156309, 0.156502, 0.156694, 0.156883, 0.157069, 0.157253, 0.157435, 0.157615, 0.157792, 0.157966, 0.158138, 0.158308, 0.158475, 0.158640, 0.158803, 0.158962, 0.159120, 0.159275, 0.159428, 0.159578, 0.159726, 0.159871, 0.160013, 0.160153, 0.160291, 0.160426, 0.160559, 0.160689, 0.160817, 0.160942, 0.161064, 0.161185, 0.161302, 0.161417, 0.161530, 0.161640, 0.161748, 0.161853, 0.161956, 0.162056, 0.162154, 0.162249, 0.162341, 0.162431, 0.162519, 0.162604, 0.162687, 0.162767, 0.162844, 0.162920, 0.162992, 0.163063, 0.163130, 0.163196, 0.163258, 0.163319, 0.163376, 0.163432, 0.163484, 0.163535, 0.163583, 0.163628, 0.163671, 0.163712, 0.163750, 0.163786, 0.163819, 0.163850, 0.163879, 0.163905, 0.163928, 0.163950, 0.163969, 0.163985, 0.163999, 0.164011, 0.164021, 0.164028, 0.164033, 0.164035, 0.164035, 0.164033, 0.164029, 0.164022, 0.164013, 0.164001, 0.163988, 0.163972, 0.163954, 0.163934, 0.163911, 0.163887, 0.163860, 0.163831, 0.163800, 0.163766, 0.163731, 0.163693, 0.163653, 0.163611, 0.163567, 0.163521, 0.163473, 0.163422, 0.163370, 0.163316, 0.163259, 0.163201, 0.163141, 0.163079, 0.163014, 0.162948, 0.162880, 0.162810, 0.162738, 0.162664, 0.162588, 0.162510, 0.162431, 0.162349, 0.162266, 0.162181, 0.162094, 0.162005, 0.161915, 0.161823, 0.161729, 0.161634, 0.161536, 0.161437, 0.161337, 0.161235, 0.161131, 0.161025, 0.160918, 0.160809, 0.160699, 0.160587, 0.160474, 0.160359, 0.160242, 0.160125, 0.160005, 0.159884, 0.159762, 0.159639, 0.159514, 0.159387, 0.159259, 0.159130, 0.159000, 0.158868, 0.158735, 0.158601, 0.158465, 0.158328, 0.158190, 0.158050, 0.157910, 0.157768, 0.157625, 0.157481, 0.157336, 0.157189, 0.157042, 0.156894, 0.156744, 0.156593, 0.156442, 0.156289, 0.156136, 0.155981, 0.155826, 0.155669, 0.155512, 0.155354, 0.155195, 0.155035, 0.154874, 0.154712, 0.154550, 0.154386, 0.154222, 0.154057, 0.153892, 0.153725, 0.153558, 0.153390, 0.153221, 0.153052, 0.152882, 0.152712, 0.152541, 0.152369, 0.152197, 0.152024, 0.151850, 0.151676, 0.151502, 0.151326, 0.151151, 0.150975, 0.150798, 0.150621, 0.150443, 0.150265, 0.150087, 0.149908, 0.149729, 0.149549, 0.149369, 0.149189, 0.149009, 0.148828, 0.148647, 0.148465, 0.148283, 0.148101, 0.147919, 0.147736, 0.147553, 0.147371, 0.147187, 0.147004, 0.146821, 0.146637, 0.146453, 0.146269, 0.146085, 0.145901, 0.145717, 0.145532, 0.145348, 0.145163, 0.144979, 0.144794, 0.144610, 0.144425, 0.144241, 0.144056, 0.143871, 0.143687, 0.143502, 0.143318, 0.143133, 0.142949, 0.142764, 0.142580, 0.142396, 0.142212, 0.142028, 0.141845, 0.141661, 0.141478, 0.141295, 0.141111, 0.140928, 0.140746, 0.140563, 0.140381, 0.140198, 0.140016, 0.139834, 0.139653, 0.139472, 0.139291, 0.139110, 0.138929, 0.138749, 0.138569, 0.138389, 0.138209, 0.138030, 0.137851, 0.137673, 0.137495, 0.137317, 0.137139, 0.136962, 0.136785, 0.136609, 0.136432, 0.136256, 0.136081, 0.135905, 0.135730, 0.135556, 0.135382, 0.135208, 0.135035, 0.134862, 0.134689, 0.134517, 0.134345, 0.134174, 0.134003, 0.133832, 0.133662, 0.133492, 0.133323, 0.133154, 0.132986, 0.132818, 0.132650, 0.132483, 0.132316, 0.132150, 0.131984, 0.131819, 0.131654, 0.131490, 0.131326, 0.131162, 0.130999, 0.130837, 0.130674, 0.130513, 0.130352, 0.130191, 0.130031, 0.129871, 0.129712, 0.129553, 0.129395, 0.129237, 0.129080, 0.128923, 0.128766, 0.128611, 0.128455, 0.128300, 0.128146, 0.127992, 0.127839, 0.127686, 0.127533, 0.127382, 0.127230, 0.127079, 0.126929, 0.126779, 0.126630, 0.126481, 0.126332, 0.126184, 0.126037, 0.125890, 0.125744, 0.125598, 0.125453, 0.125308, 0.125163, 0.125019, 0.124876, 0.124733, 0.124591, 0.124449, 0.124308, 0.124167, 0.124027, 0.123887, 0.123748, 0.123609, 0.123471, 0.123333, 0.123196, 0.123059, 0.122923, 0.122787, 0.122652, 0.122517, 0.122383, 0.122249, 0.122116, 0.121983, 0.121851, 0.121720, 0.121588, 0.121457, 0.121327, 0.121198, 0.121069, 0.120940, 0.120812, 0.120684, 0.120557, 0.120431, 0.120305, 0.120179, 0.120054, 0.119929, 0.119805, 0.119682, 0.119559, 0.119436, 0.119314, 0.119192, 0.119071, 0.118951, 0.118831, 0.118711, 0.118592, 0.118473, 0.118355, 0.118237, 0.118120, 0.118003, 0.117887, 0.117771, 0.117656, 0.117541, 0.117427, 0.117313, 0.117200, 0.117087, 0.116975, 0.116863, 0.116751, 0.116640, 0.116530, 0.116420, 0.116310, 0.116201, 0.116092, 0.115984, 0.115876, 0.115769, 0.115662, 0.115556, 0.115450, 0.115345, 0.115240, 0.115135, 0.115031, 0.114928, 0.114824, 0.114722, 0.114619, 0.114518, 0.114416, 0.114315, 0.114214, 0.114114, 0.114015, 0.113915, 0.113816, 0.113718, 0.113620, 0.113522, 0.113425, 0.113328, 0.113232, 0.113136, 0.113040, 0.112945, 0.112850, 0.112756, 0.112662, 0.112568, 0.112475, 0.112382, 0.112289, 0.112197, 0.112105, 0.112014, 0.111923, 0.111832, 0.111742, 0.111652, 0.111562, 0.111473, 0.111384, 0.111296, 0.111208, 0.111120, 0.111032, 0.110945, 0.110858, 0.110772, 0.110686, 0.110600, 0.110514, 0.110429, 0.110344, 0.110259, 0.110175, 0.110091, 0.110008, 0.109924, 0.109842, 0.109759, 0.109677, 0.109595, 0.109513, 0.109431, 0.109350, 0.109269, 0.109188, 0.109108, 0.109028, 0.108948, 0.108868, 0.108789, 0.108710, 0.108631, 0.108552, 0.108474, 0.108396, 0.108318, 0.108240, 0.108163, 0.108086, 0.108009, 0.107932, 0.107856, 0.107780, 0.107703, 0.107628, 0.107552, 0.107477, 0.107402, 0.107327, 0.107252, 0.107178, 0.107104, 0.107030, 0.106956, 0.106882, 0.106809, 0.106735, 0.106662, 0.106590, 0.106517, 0.106444, 0.106372, 0.106300, 0.106228, 0.106156, 0.106084, 0.106013, 0.105942, 0.105871, 0.105800, 0.105729, 0.105659, 0.105588, 0.105518, 0.105448, 0.105378, 0.105308, 0.105239, 0.105169, 0.105100, 0.105031, 0.104961, 0.104893, 0.104824, 0.104755, 0.104687, 0.104619, 0.104551, 0.104483, 0.104415, 0.104347, 0.104280, 0.104212, 0.104145, 0.104077, 0.104010, 0.103943, 0.103877, 0.103810, 0.103743, 0.103677, 0.103610, 0.103544, 0.103478, 0.103412, 0.103347, 0.103281, 0.103215, 0.103150, 0.103085, 0.103020, 0.102954, 0.102889, 0.102825, 0.102760, 0.102695, 0.102631, 0.102566, 0.102502, 0.102438, 0.102374, 0.102310, 0.102246, 0.102182, 0.102119, 0.102055, 0.101992, 0.101929, 0.101866, 0.101803, 0.101741, 0.101678, 0.101615, 0.101553, 0.101491, 0.101428, 0.101366, 0.101305, 0.101243, 0.101181, 0.101120, 0.101058, 0.100997, 0.100936, 0.100875, 0.100814, 0.100753, 0.100692, 0.100632, 0.100571, 0.100511, 0.100451, 0.100391, 0.100331, 0.100271, 0.100212, 0.100153, 0.100093, 0.100034, 0.099975, 0.099916, 0.099858, 0.099799, 0.099741, 0.099683, 0.099625, 0.099567, 0.099510, 0.099452, 0.099395, 0.099338, 0.099281, 0.099224, 0.099167, 0.099110, 0.099054, 0.098998, 0.098942, 0.098886, 0.098830, 0.098775, 0.098719, 0.098664, 0.098610, 0.098555, 0.098501, 0.098446, 0.098392, 0.098338, 0.098285, 0.098231, 0.098178, 0.098125, 0.098072, 0.098019, 0.097966, 0.097914, 0.097862, 0.097810, 0.097758, 0.097706, 0.097655, 0.097604, 0.097553, 0.097502, 0.097452, 0.097402, 0.097352, 0.097302, 0.097252, 0.097203, 0.097154, 0.097105, 0.097056, 0.097008, 0.096959, 0.096911, 0.096863, 0.096816, 0.096768, 0.096721, 0.096674, 0.096627, 0.096580, 0.096534, 0.096488, 0.096442, 0.096396, 0.096351, 0.096306, 0.096261, 0.096216, 0.096171, 0.096127, 0.096082, 0.096038, 0.095994, 0.095950, 0.095907, 0.095864, 0.095820, 0.095778, 0.095735, 0.095692, 0.095650, 0.095608, 0.095566, 0.095524, 0.095483, 0.095441, 0.095400, 0.095359, 0.095318, 0.095277, 0.095236, 0.095196, 0.095156, 0.095115, 0.095075, 0.095035, 0.094996, 0.094956, 0.094917, 0.094878, 0.094838, 0.094799, 0.094760, 0.094722, 0.094683, 0.094644, 0.094606, 0.094567, 0.094529, 0.094491, 0.094453, 0.094415, 0.094378, 0.094340, 0.094302, 0.094265, 0.094227, 0.094190, 0.094152, 0.094115, 0.094078, 0.094041, 0.094004, 0.093967, 0.093930, 0.093893, 0.093856, 0.093819, 0.093782, 0.093746, 0.093709, 0.093672, 0.093636, 0.093599, 0.093563, 0.093526, 0.093490, 0.093453, 0.093416, 0.093380, 0.093344, 0.093307, 0.093271, 0.093234, 0.093197, 0.093161, 0.093124, 0.093088, 0.093051, 0.093015, 0.092978, 0.092941, 0.092905, 0.092868, 0.092832, 0.092795, 0.092758, 0.092722, 0.092685, 0.092648, 0.092611, 0.092574, 0.092538, 0.092501, 0.092464, 0.092427, 0.092389, 0.092353, 0.092315, 0.092278, 0.092241, 0.092204, 0.092167, 0.092130, 0.092092, 0.092055, 0.092017, 0.091980, 0.091942, 0.091905, 0.091867, 0.091829, 0.091792, 0.091754, 0.091716, 0.091679, 0.091641, 0.091603, 0.091565, 0.091527, 0.091489, 0.091451, 0.091413, 0.091375, 0.091337, 0.091299, 0.091261, 0.091222, 0.091184, 0.091146, 0.091107, 0.091069, 0.091031, 0.090992, 0.090954, 0.090916, 0.090877, 0.090839, 0.090800, 0.090762, 0.090723, 0.090684, 0.090646, 0.090607, 0.090569, 0.090530, 0.090492, 0.090453, 0.090414, 0.090376, 0.090337, 0.090298, 0.090260, 0.090221, 0.090183, 0.090144, 0.090106, 0.090068, 0.090029, 0.089991, 0.089952, 0.089914, 0.089876, 0.089837, 0.089799, 0.089760, 0.089722, 0.089684, 0.089645, 0.089607, 0.089569, 0.089530, 0.089492, 0.089454, 0.089416, 0.089378, 0.089340, 0.089302, 0.089264, 0.089226, 0.089188, 0.089150, 0.089112, 0.089074, 0.089037, 0.088999, 0.088961, 0.088923, 0.088886, 0.088848, 0.088811, 0.088773, 0.088736, 0.088698, 0.088661, 0.088623, 0.088586, 0.088549, 0.088512, 0.088475, 0.088438, 0.088401, 0.088364, 0.088327, 0.088290, 0.088253, 0.088216, 0.088180, 0.088143, 0.088106, 0.088070, 0.088033, 0.087997, 0.087960, 0.087924, 0.087887, 0.087851, 0.087814, 0.087778, 0.087742, 0.087706, 0.087669, 0.087633, 0.087597, 0.087561, 0.087525, 0.087489, 0.087453, 0.087417, 0.087381, 0.087345, 0.087309, 0.087273, 0.087237, 0.087201, 0.087166, 0.087130, 0.087094, 0.087058, 0.087022, 0.086987, 0.086951, 0.086915, 0.086880, 0.086844, 0.086808, 0.086773, 0.086737, 0.086701, 0.086666, 0.086630, 0.086594, 0.086559, 0.086523, 0.086487, 0.086452, 0.086416, 0.086380, 0.086344, 0.086309, 0.086273, 0.086237, 0.086202, 0.086166, 0.086130, 0.086094, 0.086059, 0.086023, 0.085987, 0.085951, 0.085915, 0.085880, 0.085844, 0.085808, 0.085772, 0.085736, 0.085700, 0.085664, 0.085628, 0.085592, 0.085556, 0.085520, 0.085483, 0.085447, 0.085411, 0.085375, 0.085338, 0.085302, 0.085265, 0.085229, 0.085192, 0.085156, 0.085119, 0.085083, 0.085046, 0.085009, 0.084973, 0.084936, 0.084899, 0.084862, 0.084826, 0.084789, 0.084752, 0.084715, 0.084677, 0.084640, 0.084603, 0.084566, 0.084529, 0.084492, 0.084455, 0.084417, 0.084380, 0.084342, 0.084305, 0.084267, 0.084230, 0.084192, 0.084155, 0.084117, 0.084080, 0.084042, 0.084004, 0.083966, 0.083929, 0.083891, 0.083853, 0.083815, 0.083777, 0.083739, 0.083701, 0.083663, 0.083625, 0.083587, 0.083548, 0.083510, 0.083472, 0.083434, 0.083396, 0.083357, 0.083319, 0.083280, 0.083242, 0.083204, 0.083165, 0.083127, 0.083088, 0.083050, 0.083012, 0.082973, 0.082935, 0.082897, 0.082858, 0.082820, 0.082781, 0.082743, 0.082704, 0.082666, 0.082627, 0.082589, 0.082550, 0.082512, 0.082473, 0.082435, 0.082397, 0.082358, 0.082320, 0.082282, 0.082243, 0.082205, 0.082167, 0.082128, 0.082090, 0.082052, 0.082013, 0.081975, 0.081937, 0.081899, 0.081861, 0.081823, 0.081785, 0.081747, 0.081709, 0.081671, 0.081633, 0.081595, 0.081558, 0.081520, 0.081482, 0.081445, 0.081407, 0.081370, 0.081332, 0.081295, 0.081257, 0.081220, 0.081183, 0.081146, 0.081109, 0.081072, 0.081035, 0.080998, 0.080962, 0.080925, 0.080888, 0.080852, 0.080816, 0.080780, 0.080744, 0.080708, 0.080672, 0.080636, 0.080601, 0.080566, 0.080530, 0.080495, 0.080460, 0.080425, 0.080390, 0.080355, 0.080321, 0.080286, 0.080252, 0.080218, 0.080184, 0.080150, 0.080116, 0.080082, 0.080049, 0.080016, 0.079983, 0.079950, 0.079917, 0.079885, 0.079852, 0.079820, 0.079788, 0.079756, 0.079725, 0.079694, 0.079662, 0.079631, 0.079600, 0.079570, 0.079540, 0.079509, 0.079479, 0.079450, 0.079420, 0.079391, 0.079361, 0.079333, 0.079304, 0.079275, 0.079247, 0.079219, 0.079192, 0.079164, 0.079137, 0.079110, 0.079084, 0.079057, 0.079031, 0.079005, 0.078979, 0.078954, 0.078929, 0.078904, 0.078880, 0.078855, 0.078831, 0.078808, 0.078784, 0.078761, 0.078738, 0.078715, 0.078693, 0.078671, 0.078649, 0.078628, 0.078607, 0.078586, 0.078565, 0.078545, 0.078525, 0.078505, 0.078485, 0.078466, 0.078447, 0.078429, 0.078410, 0.078392, 0.078375, 0.078357, 0.078340, 0.078323, 0.078307, 0.078291, 0.078275, 0.078260, 0.078244, 0.078229, 0.078214, 0.078200, 0.078186, 0.078172, 0.078158, 0.078145, 0.078132, 0.078119, 0.078107, 0.078095, 0.078083, 0.078071, 0.078060, 0.078049, 0.078038, 0.078028, 0.078017, 0.078007, 0.077998, 0.077988, 0.077979, 0.077970, 0.077962, 0.077953, 0.077945, 0.077937, 0.077930, 0.077922, 0.077915, 0.077908, 0.077902, 0.077895, 0.077889, 0.077883, 0.077877, 0.077871, 0.077866, 0.077861, 0.077856, 0.077851, 0.077846, 0.077842, 0.077838, 0.077834, 0.077830, 0.077826, 0.077823, 0.077819, 0.077816, 0.077813, 0.077810, 0.077808, 0.077805, 0.077803, 0.077800, 0.077798, 0.077796, 0.077795, 0.077793, 0.077791, 0.077790, 0.077788, 0.077787, 0.077785, 0.077784, 0.077783, 0.077782, 0.077781, 0.077780, 0.077779, 0.077779, 0.077778, 0.077777, 0.077777, 0.077776, 0.077776, 0.077775, 0.077775, 0.077774, 0.077774, 0.077773, 0.077773, 0.077773, 0.077772, 0.077772, 0.077771, 0.077771, 0.077770, 0.077770, 0.077769, 0.077769, 0.077768, 0.077767, 0.077767, 0.077766, 0.077765, 0.077764, 0.077763, 0.077762, 0.077761, 0.077760, 0.077759, 0.077757, 0.077756, 0.077754, 0.077753, 0.077751, 0.077749, 0.077747, 0.077745, 0.077743, 0.077741, 0.077739, 0.077736, 0.077734, 0.077731, 0.077728, 0.077725, 0.077722, 0.077719, 0.077716, 0.077712, 0.077708, 0.077705, 0.077701, 0.077696, 0.077692, 0.077688, 0.077683, 0.077678, 0.077673, 0.077668, 0.077663, 0.077657, 0.077651, 0.077646, 0.077640, 0.077633, 0.077627, 0.077620, 0.077613, 0.077606, 0.077599, 0.077592, 0.077584, 0.077576, 0.077568, 0.077560, 0.077551, 0.077542, 0.077533, 0.077524, 0.077515, 0.077506, 0.077496, 0.077486, 0.077476, 0.077466, 0.077455, 0.077444, 0.077433, 0.077422, 0.077411, 0.077399, 0.077387, 0.077375, 0.077363, 0.077351, 0.077338, 0.077325, 0.077312, 0.077298, 0.077285, 0.077271, 0.077257, 0.077243, 0.077229, 0.077214, 0.077200, 0.077185, 0.077169, 0.077154, 0.077138, 0.077123, 0.077107, 0.077091, 0.077074, 0.077058, 0.077041, 0.077024, 0.077007, 0.076990, 0.076973, 0.076955, 0.076937, 0.076919, 0.076901, 0.076883, 0.076865, 0.076846, 0.076827, 0.076808, 0.076789, 0.076770, 0.076751, 0.076731, 0.076711, 0.076692, 0.076672, 0.076652, 0.076632, 0.076611, 0.076591, 0.076570, 0.076549, 0.076529, 0.076508, 0.076487, 0.076466, 0.076445, 0.076423, 0.076402, 0.076381, 0.076359, 0.076338, 0.076316, 0.076294, 0.076272, 0.076251, 0.076229, 0.076207, 0.076184, 0.076162, 0.076140, 0.076118, 0.076095, 0.076073, 0.076050, 0.076028, 0.076005, 0.075983, 0.075960, 0.075938, 0.075915, 0.075892, 0.075870, 0.075847, 0.075824, 0.075801, 0.075779, 0.075756, 0.075733, 0.075710, 0.075687, 0.075664, 0.075642, 0.075619, 0.075596, 0.075573, 0.075551, 0.075528, 0.075505, 0.075482, 0.075460, 0.075437, 0.075414, 0.075392, 0.075369, 0.075347, 0.075324, 0.075302, 0.075279, 0.075257, 0.075234, 0.075212, 0.075189, 0.075167, 0.075144, 0.075122, 0.075099, 0.075077, 0.075054, 0.075032, 0.075010, 0.074988, 0.074966, 0.074943, 0.074921, 0.074899, 0.074877, 0.074855, 0.074833, 0.074810, 0.074788, 0.074766, 0.074744, 0.074722, 0.074700, 0.074678, 0.074655, 0.074633, 0.074611, 0.074589, 0.074567, 0.074545, 0.074522, 0.074500, 0.074478, 0.074456, 0.074434, 0.074411, 0.074389, 0.074367, 0.074344, 0.074322, 0.074300, 0.074277, 0.074255, 0.074232, 0.074209, 0.074187, 0.074164, 0.074141, 0.074118, 0.074095, 0.074072, 0.074049, 0.074026, 0.074003, 0.073979, 0.073956, 0.073932, 0.073909, 0.073885, 0.073861, 0.073837, 0.073813, 0.073789, 0.073765, 0.073741, 0.073717, 0.073692, 0.073667, 0.073643, 0.073618, 0.073592, 0.073567, 0.073542, 0.073516, 0.073491, 0.073465, 0.073439, 0.073413, 0.073386, 0.073360, 0.073333, 0.073306, 0.073279, 0.073252, 0.073225, 0.073198, 0.073170, 0.073142, 0.073114, 0.073086, 0.073057, 0.073029, 0.073000, 0.072971, 0.072942, 0.072913, 0.072884, 0.072855, 0.072825, 0.072795, 0.072765, 0.072734, 0.072704, 0.072673, 0.072642, 0.072611, 0.072580, 0.072548, 0.072517, 0.072485, 0.072453, 0.072421, 0.072389, 0.072356, 0.072324, 0.072291, 0.072258, 0.072225, 0.072191, 0.072158, 0.072124, 0.072090, 0.072056, 0.072022, 0.071988, 0.071954, 0.071919, 0.071884, 0.071849, 0.071814, 0.071779, 0.071744, 0.071709, 0.071673, 0.071637, 0.071602, 0.071566, 0.071530, 0.071494, 0.071458, 0.071421, 0.071385, 0.071348, 0.071311, 0.071275, 0.071238, 0.071201, 0.071164, 0.071127, 0.071090, 0.071052, 0.071015, 0.070978, 0.070941, 0.070903, 0.070866, 0.070828, 0.070791, 0.070753, 0.070716, 0.070678, 0.070640, 0.070603, 0.070565, 0.070527, 0.070490, 0.070452, 0.070414, 0.070377, 0.070339, 0.070301, 0.070264, 0.070226, 0.070189, 0.070151, 0.070114, 0.070077, 0.070039, 0.070002, 0.069964, 0.069927, 0.069890, 0.069853, 0.069816, 0.069779, 0.069742, 0.069705, 0.069669, 0.069632, 0.069596, 0.069559, 0.069523, 0.069487, 0.069451, 0.069415, 0.069379, 0.069343, 0.069308, 0.069272, 0.069237, 0.069202, 0.069167, 0.069132, 0.069097, 0.069062, 0.069028, 0.068994, 0.068959, 0.068925, 0.068892, 0.068858, 0.068825, 0.068791, 0.068758, 0.068725, 0.068693, 0.068660, 0.068628, 0.068595, 0.068563, 0.068532, 0.068500, 0.068469, 0.068438, 0.068407, 0.068376, 0.068345, 0.068315, 0.068285, 0.068255, 0.068226, 0.068196, 0.068167, 0.068138, 0.068109, 0.068080, 0.068052, 0.068024, 0.067996, 0.067968, 0.067941, 0.067914, 0.067887, 0.067860, 0.067834, 0.067808, 0.067782, 0.067756, 0.067731, 0.067705, 0.067681, 0.067656, 0.067631, 0.067607, 0.067584, 0.067560, 0.067536, 0.067513, 0.067490, 0.067468, 0.067445, 0.067423, 0.067401, 0.067379, 0.067358, 0.067337, 0.067316, 0.067295, 0.067275, 0.067255, 0.067235, 0.067215, 0.067196, 0.067177, 0.067158, 0.067139, 0.067121, 0.067103, 0.067085, 0.067067, 0.067050, 0.067033, 0.067016, 0.066999, 0.066983, 0.066966, 0.066950, 0.066935, 0.066919, 0.066904, 0.066889, 0.066874, 0.066859, 0.066845, 0.066830, 0.066816, 0.066803, 0.066789, 0.066776, 0.066763, 0.066750, 0.066737, 0.066724, 0.066712, 0.066700, 0.066688, 0.066676, 0.066664, 0.066653, 0.066641, 0.066630, 0.066619, 0.066609, 0.066598, 0.066588, 0.066577, 0.066567, 0.066557, 0.066547, 0.066538, 0.066528, 0.066519, 0.066509, 0.066500, 0.066491, 0.066483, 0.066474, 0.066465, 0.066457, 0.066449, 0.066440, 0.066432, 0.066424, 0.066416, 0.066408, 0.066400, 0.066393, 0.066385, 0.066378, 0.066370, 0.066363, 0.066356, 0.066348, 0.066341, 0.066334, 0.066327, 0.066320, 0.066313, 0.066307, 0.066300, 0.066293, 0.066286, 0.066279, 0.066273, 0.066266, 0.066259, 0.066253, 0.066246, 0.066239, 0.066233, 0.066226, 0.066220, 0.066213, 0.066207, 0.066200, 0.066193, 0.066187, 0.066180, 0.066173, 0.066166, 0.066160, 0.066153, 0.066146, 0.066139, 0.066132, 0.066125, 0.066118, 0.066111, 0.066104, 0.066097, 0.066090, 0.066083, 0.066075, 0.066068, 0.066060, 0.066053, 0.066045, 0.066037, 0.066030, 0.066022, 0.066014, 0.066006, 0.065998, 0.065990, 0.065982, 0.065973, 0.065965, 0.065956, 0.065948, 0.065939, 0.065930, 0.065921, 0.065913, 0.065904, 0.065895, 0.065885, 0.065876, 0.065867, 0.065857, 0.065848, 0.065838, 0.065828, 0.065818, 0.065808, 0.065797, 0.065787, 0.065777, 0.065766, 0.065755, 0.065745, 0.065734, 0.065723, 0.065712, 0.065701, 0.065689, 0.065678, 0.065666, 0.065655, 0.065643, 0.065631, 0.065619, 0.065607, 0.065595, 0.065583, 0.065570, 0.065558, 0.065545, 0.065533, 0.065520, 0.065507, 0.065494, 0.065481, 0.065467, 0.065454, 0.065441, 0.065428, 0.065414, 0.065401, 0.065387, 0.065373, 0.065359, 0.065345, 0.065331, 0.065317, 0.065303, 0.065289, 0.065275, 0.065260, 0.065246, 0.065231, 0.065217, 0.065202, 0.065187, 0.065172, 0.065157, 0.065142, 0.065127, 0.065112, 0.065097, 0.065082, 0.065067, 0.065052, 0.065037, 0.065021, 0.065006, 0.064991, 0.064975, 0.064960, 0.064945, 0.064929, 0.064914, 0.064898, 0.064883, 0.064868, 0.064852, 0.064837, 0.064822, 0.064806, 0.064791, 0.064775, 0.064760, 0.064745, 0.064729, 0.064714, 0.064699, 0.064684, 0.064669, 0.064654, 0.064639, 0.064624, 0.064609, 0.064594, 0.064579, 0.064564, 0.064550, 0.064535, 0.064520, 0.064506, 0.064491, 0.064477, 0.064463, 0.064449, 0.064435, 0.064421, 0.064407, 0.064393, 0.064379, 0.064366, 0.064352, 0.064339, 0.064326, 0.064313, 0.064300, 0.064287, 0.064274, 0.064262, 0.064249, 0.064237, 0.064225, 0.064213, 0.064201, 0.064189, 0.064178, 0.064166, 0.064155, 0.064144, 0.064133, 0.064122, 0.064111, 0.064100, 0.064090, 0.064080, 0.064070, 0.064060, 0.064050, 0.064041, 0.064031, 0.064022, 0.064013, 0.064004, 0.063995, 0.063987, 0.063979, 0.063971, 0.063963, 0.063955, 0.063948, 0.063940, 0.063933, 0.063926, 0.063919, 0.063913, 0.063906, 0.063900, 0.063894, 0.063888, 0.063882, 0.063876, 0.063871, 0.063866, 0.063861, 0.063856, 0.063852, 0.063847, 0.063843, 0.063839, 0.063835, 0.063831, 0.063828, 0.063825, 0.063821, 0.063818, 0.063816, 0.063813, 0.063811, 0.063808, 0.063806, 0.063804, 0.063803, 0.063801, 0.063800, 0.063798, 0.063797, 0.063796, 0.063795, 0.063795, 0.063794, 0.063794, 0.063793, 0.063793, 0.063793, 0.063794, 0.063794, 0.063794, 0.063795, 0.063796, 0.063796, 0.063797, 0.063799, 0.063800, 0.063801, 0.063803, 0.063804, 0.063806, 0.063807, 0.063809, 0.063811, 0.063813, 0.063815, 0.063817, 0.063820, 0.063822, 0.063824, 0.063827, 0.063829, 0.063832, 0.063834, 0.063837, 0.063839, 0.063842, 0.063845, 0.063847, 0.063850, 0.063853, 0.063856, 0.063859, 0.063862, 0.063865, 0.063868, 0.063870, 0.063873, 0.063876, 0.063879, 0.063882, 0.063885, 0.063887, 0.063890, 0.063893, 0.063895, 0.063898, 0.063901, 0.063903, 0.063906, 0.063908, 0.063911, 0.063913, 0.063915, 0.063917, 0.063919, 0.063921, 0.063923, 0.063924, 0.063926, 0.063928, 0.063929, 0.063930, 0.063931, 0.063932, 0.063933, 0.063934, 0.063935, 0.063935, 0.063936, 0.063936, 0.063936, 0.063936, 0.063936, 0.063936, 0.063935, 0.063935, 0.063934, 0.063933, 0.063931, 0.063930, 0.063929, 0.063927, 0.063925, 0.063923, 0.063921, 0.063918, 0.063915, 0.063912, 0.063909, 0.063906, 0.063903, 0.063899, 0.063895, 0.063891, 0.063886, 0.063882, 0.063877, 0.063872, 0.063866, 0.063861, 0.063855, 0.063849, 0.063843, 0.063836, 0.063829, 0.063822, 0.063815, 0.063808, 0.063800, 0.063792, 0.063784, 0.063776, 0.063767, 0.063758, 0.063749, 0.063740, 0.063730, 0.063720, 0.063710, 0.063700, 0.063689, 0.063679, 0.063667, 0.063656, 0.063644, 0.063632, 0.063620, 0.063608, 0.063595, 0.063583, 0.063570, 0.063556, 0.063543, 0.063529, 0.063515, 0.063501, 0.063486, 0.063472, 0.063457, 0.063442, 0.063426, 0.063411, 0.063395, 0.063379, 0.063363, 0.063346, 0.063330, 0.063313, 0.063296, 0.063278, 0.063261, 0.063243, 0.063226, 0.063208, 0.063189, 0.063171, 0.063153, 0.063134, 0.063115, 0.063096, 0.063077, 0.063058, 0.063038, 0.063019, 0.062999, 0.062979, 0.062959, 0.062939, 0.062918, 0.062898, 0.062877, 0.062856, 0.062836, 0.062815, 0.062794, 0.062772, 0.062751, 0.062729, 0.062708, 0.062686, 0.062665, 0.062643, 0.062621, 0.062599, 0.062577, 0.062555, 0.062533, 0.062511, 0.062489, 0.062467, 0.062444, 0.062422, 0.062400, 0.062378, 0.062355, 0.062333, 0.062311, 0.062288, 0.062266, 0.062244, 0.062221, 0.062199, 0.062177, 0.062154, 0.062132, 0.062110, 0.062088, 0.062066, 0.062044, 0.062022, 0.062000, 0.061978, 0.061956, 0.061934, 0.061912, 0.061891, 0.061869, 0.061847, 0.061826, 0.061804, 0.061783, 0.061762, 0.061741, 0.061720, 0.061699, 0.061678, 0.061657, 0.061637, 0.061616, 0.061596, 0.061575, 0.061555, 0.061535, 0.061515, 0.061495, 0.061476, 0.061456, 0.061437, 0.061417, 0.061398, 0.061379, 0.061360, 0.061341, 0.061322, 0.061304, 0.061285, 0.061267, 0.061249, 0.061232, 0.061214, 0.061196, 0.061179, 0.061162, 0.061145, 0.061128, 0.061111, 0.061094, 0.061078, 0.061061, 0.061045, 0.061029, 0.061013, 0.060997, 0.060982, 0.060966, 0.060951, 0.060936, 0.060921, 0.060906, 0.060891, 0.060877, 0.060862, 0.060848, 0.060834, 0.060820, 0.060807, 0.060793, 0.060780, 0.060766, 0.060753, 0.060740, 0.060728, 0.060715, 0.060702, 0.060690, 0.060678, 0.060666, 0.060653, 0.060641, 0.060630, 0.060618, 0.060607, 0.060595, 0.060584, 0.060573, 0.060562, 0.060551, 0.060540, 0.060530, 0.060519, 0.060509, 0.060498, 0.060488, 0.060478, 0.060468, 0.060458, 0.060448, 0.060438, 0.060428, 0.060419, 0.060409, 0.060400, 0.060390, 0.060381, 0.060371, 0.060362, 0.060353, 0.060344, 0.060335, 0.060326, 0.060317, 0.060308, 0.060300, 0.060291, 0.060282, 0.060273, 0.060265, 0.060256, 0.060247, 0.060238, 0.060229, 0.060221, 0.060212, 0.060203, 0.060195, 0.060186, 0.060177, 0.060169, 0.060160, 0.060151, 0.060142, 0.060134, 0.060125, 0.060116, 0.060107, 0.060098, 0.060089, 0.060080, 0.060071, 0.060062, 0.060053, 0.060044, 0.060035, 0.060025, 0.060016, 0.060007, 0.059997, 0.059988, 0.059978, 0.059968, 0.059959, 0.059949, 0.059939, 0.059929, 0.059919, 0.059909, 0.059899, 0.059889, 0.059879, 0.059868, 0.059858, 0.059847, 0.059836, 0.059825, 0.059814, 0.059803, 0.059792, 0.059780, 0.059769, 0.059757, 0.059746, 0.059734, 0.059722, 0.059710, 0.059698, 0.059686, 0.059674, 0.059661, 0.059648, 0.059636, 0.059623, 0.059610, 0.059597, 0.059584, 0.059570, 0.059557, 0.059543, 0.059529, 0.059516, 0.059502, 0.059488, 0.059474, 0.059460, 0.059445, 0.059430, 0.059416, 0.059401, 0.059386, 0.059371, 0.059356, 0.059341, 0.059326, 0.059311, 0.059295, 0.059280, 0.059264, 0.059248, 0.059232, 0.059216, 0.059200, 0.059184, 0.059168, 0.059151, 0.059135, 0.059118, 0.059101, 0.059085, 0.059068, 0.059051, 0.059034, 0.059017, 0.059000, 0.058983, 0.058965, 0.058948, 0.058931, 0.058914, 0.058896, 0.058878, 0.058861, 0.058843, 0.058826, 0.058808, 0.058791, 0.058773, 0.058755, 0.058737, 0.058719, 0.058702, 0.058684, 0.058666, 0.058648, 0.058630, 0.058612, 0.058594, 0.058576, 0.058559, 0.058541, 0.058523, 0.058505, 0.058487, 0.058470, 0.058452, 0.058435, 0.058417, 0.058399, 0.058382, 0.058364, 0.058346, 0.058329, 0.058311, 0.058294, 0.058277, 0.058260, 0.058242, 0.058225, 0.058208, 0.058191, 0.058174, 0.058158, 0.058141, 0.058124, 0.058108, 0.058091, 0.058075, 0.058058, 0.058042, 0.058026, 0.058010, 0.057994, 0.057978, 0.057962, 0.057946, 0.057931, 0.057915, 0.057900, 0.057885, 0.057870, 0.057854, 0.057839, 0.057824, 0.057810, 0.057795, 0.057780, 0.057766, 0.057752, 0.057738, 0.057724, 0.057710, 0.057696, 0.057682, 0.057668, 0.057655, 0.057641, 0.057628, 0.057615, 0.057602, 0.057589, 0.057576, 0.057564, 0.057551, 0.057539, 0.057526, 0.057514, 0.057502, 0.057490, 0.057479, 0.057467, 0.057455, 0.057444, 0.057432, 0.057421, 0.057410, 0.057399, 0.057388, 0.057377, 0.057366, 0.057355, 0.057345, 0.057334, 0.057324, 0.057313, 0.057303, 0.057293, 0.057283, 0.057273, 0.057263, 0.057253, 0.057243, 0.057233, 0.057224, 0.057214, 0.057205, 0.057195, 0.057186, 0.057177, 0.057168, 0.057158, 0.057149, 0.057140, 0.057131, 0.057122, 0.057114, 0.057105, 0.057096, 0.057087, 0.057079, 0.057070, 0.057061, 0.057053, 0.057044, 0.057036, 0.057027, 0.057019, 0.057010, 0.057002, 0.056993, 0.056985, 0.056977, 0.056968, 0.056960, 0.056952, 0.056944, 0.056936, 0.056927, 0.056919, 0.056911, 0.056902, 0.056894, 0.056886, 0.056878, 0.056870, 0.056862, 0.056853, 0.056845, 0.056837, 0.056828, 0.056820, 0.056812, 0.056803, 0.056795, 0.056787, 0.056778, 0.056770, 0.056762, 0.056753, 0.056745, 0.056737, 0.056729, 0.056720, 0.056712, 0.056704, 0.056695, 0.056687, 0.056679, 0.056670, 0.056662, 0.056654, 0.056645, 0.056637, 0.056629, 0.056620, 0.056612, 0.056604, 0.056596, 0.056587, 0.056579, 0.056571, 0.056563, 0.056554, 0.056546, 0.056538, 0.056530, 0.056522, 0.056514, 0.056506, 0.056498, 0.056490, 0.056482, 0.056474, 0.056466, 0.056458, 0.056450, 0.056442, 0.056434, 0.056427, 0.056419, 0.056412, 0.056404, 0.056397, 0.056389, 0.056382, 0.056375, 0.056368, 0.056361, 0.056354, 0.056347, 0.056340, 0.056333, 0.056326, 0.056319, 0.056313, 0.056306, 0.056300, 0.056294, 0.056287, 0.056281, 0.056275, 0.056269, 0.056263, 0.056258, 0.056252, 0.056246, 0.056241, 0.056236, 0.056230, 0.056226, 0.056221, 0.056216, 0.056211, 0.056206, 0.056202, 0.056198, 0.056193, 0.056189, 0.056185, 0.056181, 0.056177, 0.056174, 0.056170, 0.056167, 0.056164, 0.056161, 0.056158, 0.056155, 0.056152, 0.056149, 0.056147, 0.056145, 0.056142, 0.056140, 0.056138, 0.056137, 0.056135, 0.056133, 0.056132, 0.056131, 0.056130, 0.056129, 0.056128, 0.056128, 0.056127, 0.056127, 0.056126, 0.056126, 0.056126, 0.056126, 0.056126, 0.056127, 0.056127, 0.056128, 0.056129, 0.056130, 0.056131, 0.056132, 0.056133, 0.056135, 0.056136, 0.056138, 0.056140, 0.056142, 0.056144, 0.056146, 0.056148, 0.056150, 0.056153, 0.056155, 0.056158, 0.056161, 0.056164, 0.056167, 0.056170, 0.056173, 0.056176, 0.056179, 0.056183, 0.056186, 0.056190, 0.056194, 0.056197, 0.056201, 0.056205, 0.056209, 0.056214, 0.056218, 0.056222, 0.056226, 0.056231, 0.056235, 0.056240, 0.056244, 0.056249, 0.056254, 0.056258, 0.056263, 0.056268, 0.056273, 0.056278, 0.056283, 0.056288, 0.056293, 0.056298, 0.056303, 0.056308, 0.056314, 0.056319, 0.056324, 0.056330, 0.056335, 0.056340, 0.056346, 0.056351, 0.056356, 0.056362, 0.056367, 0.056372, 0.056378, 0.056383, 0.056388, 0.056394, 0.056399, 0.056404, 0.056410, 0.056415, 0.056420, 0.056426, 0.056431, 0.056436, 0.056441, 0.056447, 0.056452, 0.056457, 0.056462, 0.056467, 0.056472, 0.056477, 0.056481, 0.056486, 0.056491, 0.056496, 0.056501, 0.056505, 0.056510, 0.056514, 0.056519, 0.056523, 0.056528, 0.056532, 0.056536, 0.056541, 0.056545, 0.056549, 0.056553, 0.056556, 0.056560, 0.056564, 0.056568, 0.056572, 0.056575, 0.056579, 0.056582, 0.056585, 0.056589, 0.056592, 0.056595, 0.056598, 0.056600, 0.056603, 0.056606, 0.056608, 0.056611, 0.056613, 0.056615, 0.056618, 0.056620, 0.056621, 0.056623, 0.056625, 0.056627, 0.056628, 0.056630, 0.056631, 0.056632, 0.056633, 0.056634, 0.056635, 0.056635, 0.056636, 0.056636, 0.056637, 0.056637, 0.056637, 0.056637, 0.056637, 0.056637, 0.056636, 0.056636, 0.056635, 0.056634, 0.056634, 0.056633, 0.056632, 0.056630, 0.056629, 0.056628, 0.056626, 0.056624, 0.056623, 0.056621, 0.056619, 0.056617, 0.056614, 0.056612, 0.056610, 0.056607, 0.056604, 0.056602, 0.056599, 0.056596, 0.056593, 0.056589, 0.056586, 0.056582, 0.056579, 0.056575, 0.056571, 0.056567, 0.056563, 0.056559, 0.056555, 0.056551, 0.056546, 0.056542, 0.056537, 0.056532, 0.056527, 0.056522, 0.056517, 0.056512, 0.056507, 0.056502, 0.056496, 0.056491, 0.056485, 0.056480, 0.056474, 0.056468, 0.056462, 0.056456, 0.056450, 0.056444, 0.056438, 0.056432, 0.056426, 0.056420, 0.056413, 0.056407, 0.056400, 0.056394, 0.056387, 0.056381, 0.056374, 0.056367, 0.056361, 0.056354, 0.056347, 0.056340, 0.056333, 0.056326, 0.056319, 0.056312, 0.056305, 0.056298, 0.056290, 0.056283, 0.056276, 0.056269, 0.056262, 0.056255, 0.056247, 0.056240, 0.056233, 0.056226, 0.056219, 0.056211, 0.056204, 0.056197, 0.056190, 0.056183, 0.056175, 0.056168, 0.056161, 0.056154, 0.056147, 0.056140, 0.056133, 0.056126, 0.056119, 0.056112, 0.056105, 0.056098, 0.056091, 0.056084, 0.056077, 0.056070, 0.056064, 0.056057, 0.056050, 0.056044, 0.056037, 0.056031, 0.056024, 0.056018, 0.056012, 0.056005, 0.055999, 0.055993, 0.055987, 0.055981, 0.055975, 0.055969, 0.055963, 0.055957, 0.055951, 0.055945, 0.055939, 0.055934, 0.055928, 0.055922, 0.055917, 0.055911, 0.055906, 0.055901, 0.055896, 0.055890, 0.055885, 0.055880, 0.055875, 0.055870, 0.055865, 0.055860, 0.055855, 0.055850, 0.055846, 0.055841, 0.055836, 0.055832, 0.055827, 0.055823, 0.055818, 0.055814, 0.055809, 0.055805, 0.055801, 0.055797, 0.055792, 0.055788, 0.055784, 0.055780, 0.055776, 0.055772, 0.055768, 0.055765, 0.055761, 0.055757, 0.055753, 0.055749, 0.055746, 0.055742, 0.055739, 0.055735, 0.055731, 0.055728, 0.055724, 0.055720, 0.055717, 0.055713, 0.055710, 0.055706, 0.055703, 0.055699, 0.055695, 0.055692, 0.055689, 0.055685, 0.055681, 0.055678, 0.055674, 0.055671, 0.055667, 0.055664, 0.055660, 0.055657, 0.055653, 0.055649, 0.055646, 0.055642, 0.055638, 0.055634, 0.055630, 0.055626, 0.055622, 0.055618, 0.055614, 0.055610, 0.055606, 0.055602, 0.055598, 0.055593, 0.055589, 0.055585, 0.055580, 0.055576, 0.055571, 0.055566, 0.055562, 0.055557, 0.055552, 0.055547, 0.055542, 0.055537, 0.055532, 0.055527, 0.055522, 0.055517, 0.055511, 0.055506, 0.055501, 0.055495, 0.055489, 0.055484, 0.055478, 0.055472, 0.055466, 0.055460, 0.055454, 0.055448, 0.055442, 0.055435, 0.055429, 0.055422, 0.055416, 0.055409, 0.055403, 0.055396, 0.055389, 0.055382, 0.055375, 0.055368, 0.055360, 0.055353, 0.055346, 0.055338, 0.055330, 0.055323, 0.055315, 0.055307, 0.055300, 0.055292, 0.055284, 0.055276, 0.055268, 0.055259, 0.055251, 0.055243, 0.055235, 0.055226, 0.055218, 0.055209, 0.055200, 0.055192, 0.055183, 0.055174, 0.055165, 0.055156, 0.055147, 0.055138, 0.055128, 0.055119, 0.055110, 0.055101, 0.055092, 0.055082, 0.055073, 0.055063, 0.055054, 0.055044, 0.055034, 0.055024, 0.055014, 0.055005, 0.054995, 0.054985, 0.054975, 0.054965, 0.054955, 0.054945, 0.054935, 0.054924, 0.054914, 0.054904, 0.054894, 0.054883, 0.054873, 0.054863, 0.054852, 0.054842, 0.054832, 0.054821, 0.054811, 0.054800, 0.054790, 0.054780, 0.054769, 0.054759, 0.054748, 0.054738, 0.054727, 0.054717, 0.054706, 0.054696, 0.054685, 0.054675, 0.054664, 0.054654, 0.054643, 0.054632, 0.054622, 0.054611, 0.054601, 0.054590, 0.054579, 0.054569, 0.054558, 0.054548, 0.054537, 0.054526, 0.054516, 0.054505, 0.054495, 0.054484, 0.054474, 0.054463, 0.054453, 0.054443, 0.054432, 0.054422, 0.054412, 0.054401, 0.054391, 0.054380, 0.054370, 0.054360, 0.054349, 0.054339, 0.054329, 0.054318, 0.054308, 0.054298, 0.054288, 0.054277, 0.054267, 0.054257, 0.054247, 0.054237, 0.054227, 0.054217, 0.054207, 0.054197, 0.054187, 0.054177, 0.054167, 0.054157, 0.054147, 0.054137, 0.054127, 0.054117, 0.054107, 0.054097, 0.054087, 0.054078, 0.054068, 0.054058, 0.054048, 0.054038, 0.054029, 0.054019, 0.054009, 0.054000, 0.053990, 0.053980, 0.053971, 0.053961, 0.053951, 0.053942, 0.053932, 0.053923, 0.053913, 0.053904, 0.053894, 0.053885, 0.053875, 0.053866, 0.053857, 0.053847, 0.053838, 0.053829, 0.053819, 0.053810, 0.053801, 0.053791, 0.053782, 0.053773, 0.053764, 0.053755, 0.053746, 0.053737, 0.053728, 0.053719, 0.053710, 0.053700, 0.053691, 0.053682, 0.053673, 0.053664, 0.053655, 0.053646, 0.053637, 0.053628, 0.053619, 0.053611, 0.053602, 0.053593, 0.053584, 0.053575, 0.053566, 0.053557, 0.053549, 0.053540, 0.053531, 0.053522, 0.053513, 0.053505, 0.053496, 0.053487, 0.053479, 0.053470, 0.053461, 0.053453, 0.053444, 0.053436, 0.053427, 0.053418, 0.053410, 0.053401, 0.053393, 0.053384, 0.053375, 0.053367, 0.053358, 0.053350, 0.053341, 0.053333, 0.053325, 0.053316, 0.053308, 0.053300, 0.053291, 0.053283, 0.053275, 0.053266, 0.053258, 0.053250, 0.053241, 0.053233, 0.053225, 0.053217, 0.053209, 0.053201, 0.053192, 0.053184, 0.053176, 0.053168, 0.053161, 0.053153, 0.053145, 0.053137, 0.053129, 0.053121, 0.053113, 0.053106, 0.053098, 0.053090, 0.053082, 0.053075, 0.053067, 0.053059, 0.053052, 0.053044, 0.053037, 0.053030, 0.053022, 0.053015, 0.053008, 0.053000, 0.052993, 0.052986, 0.052979, 0.052972, 0.052965, 0.052958, 0.052952, 0.052945, 0.052938, 0.052932, 0.052925, 0.052919, 0.052913, 0.052906, 0.052900, 0.052894, 0.052888, 0.052882, 0.052876, 0.052870, 0.052865, 0.052859, 0.052853, 0.052848, 0.052843, 0.052837, 0.052832, 0.052827, 0.052822, 0.052817, 0.052813, 0.052808, 0.052803, 0.052799, 0.052795, 0.052791, 0.052787, 0.052783, 0.052779, 0.052775, 0.052772, 0.052769, 0.052765, 0.052762, 0.052759, 0.052756, 0.052753, 0.052751, 0.052748, 0.052746, 0.052744, 0.052742, 0.052740, 0.052738, 0.052736, 0.052735, 0.052733, 0.052732, 0.052731, 0.052730, 0.052729, 0.052729, 0.052728, 0.052728, 0.052728, 0.052728, 0.052728, 0.052729, 0.052729, 0.052730, 0.052731, 0.052732, 0.052733, 0.052734, 0.052735, 0.052737, 0.052739, 0.052741, 0.052743, 0.052745, 0.052747, 0.052750, 0.052752, 0.052755, 0.052758, 0.052761, 0.052765, 0.052768, 0.052772, 0.052775, 0.052779, 0.052783, 0.052787, 0.052792, 0.052796, 0.052801, 0.052806, 0.052810, 0.052815, 0.052821, 0.052826, 0.052831, 0.052837, 0.052842, 0.052848, 0.052854, 0.052860, 0.052867, 0.052873, 0.052879, 0.052886, 0.052893, 0.052899, 0.052906, 0.052913, 0.052920, 0.052927, 0.052934, 0.052942, 0.052949, 0.052957, 0.052964, 0.052972, 0.052980, 0.052988, 0.052996, 0.053004, 0.053012, 0.053020, 0.053029, 0.053037, 0.053045, 0.053054, 0.053062, 0.053071, 0.053079, 0.053088, 0.053097, 0.053105, 0.053114, 0.053123, 0.053131, 0.053140, 0.053149, 0.053158, 0.053167, 0.053176, 0.053185, 0.053194, 0.053203, 0.053212, 0.053221, 0.053230, 0.053239, 0.053248, 0.053257, 0.053266, 0.053275, 0.053284, 0.053293, 0.053302, 0.053311, 0.053320, 0.053329, 0.053337, 0.053346, 0.053355, 0.053364, 0.053373, 0.053381, 0.053390, 0.053398, 0.053407, 0.053415, 0.053424, 0.053432, 0.053441, 0.053449, 0.053457, 0.053465, 0.053473, 0.053481, 0.053489, 0.053497, 0.053505, 0.053513, 0.053520, 0.053528, 0.053535, 0.053543, 0.053550, 0.053557, 0.053564, 0.053571, 0.053578, 0.053585, 0.053592, 0.053599, 0.053605, 0.053612, 0.053618, 0.053624, 0.053631, 0.053637, 0.053643, 0.053648, 0.053654, 0.053660, 0.053665, 0.053670, 0.053676, 0.053681, 0.053686, 0.053690, 0.053695, 0.053700, 0.053704, 0.053709, 0.053713, 0.053717, 0.053721, 0.053725, 0.053729, 0.053732, 0.053736, 0.053739, 0.053742, 0.053745, 0.053748, 0.053751, 0.053754, 0.053756, 0.053759, 0.053761, 0.053763, 0.053765, 0.053767, 0.053768, 0.053770, 0.053771, 0.053773, 0.053774, 0.053775, 0.053775, 0.053776, 0.053777, 0.053777, 0.053777, 0.053777, 0.053777, 0.053777, 0.053776, 0.053776, 0.053775, 0.053774, 0.053773, 0.053772, 0.053770, 0.053769, 0.053767, 0.053765, 0.053763, 0.053761, 0.053759, 0.053756, 0.053754, 0.053751, 0.053748, 0.053745, 0.053742, 0.053738, 0.053734, 0.053731, 0.053727, 0.053723, 0.053719, 0.053714, 0.053710, 0.053705, 0.053700, 0.053696, 0.053690, 0.053685, 0.053680, 0.053674, 0.053669, 0.053663, 0.053657, 0.053651, 0.053644, 0.053638, 0.053631, 0.053624, 0.053618, 0.053611, 0.053603, 0.053596, 0.053589, 0.053581, 0.053573, 0.053565, 0.053557, 0.053549, 0.053541, 0.053533, 0.053524, 0.053515, 0.053506, 0.053498, 0.053489, 0.053479, 0.053470, 0.053461, 0.053451, 0.053441, 0.053432, 0.053422, 0.053411, 0.053401, 0.053391, 0.053380, 0.053370, 0.053359, 0.053348, 0.053337, 0.053326, 0.053315, 0.053304, 0.053292, 0.053281, 0.053269, 0.053258, 0.053246, 0.053234, 0.053222, 0.053210, 0.053198, 0.053186, 0.053173, 0.053161, 0.053148, 0.053136, 0.053123, 0.053110, 0.053097, 0.053084, 0.053071, 0.053057, 0.053044, 0.053030, 0.053017, 0.053003, 0.052990, 0.052976, 0.052962, 0.052948, 0.052934, 0.052920, 0.052906, 0.052892, 0.052877, 0.052863, 0.052849, 0.052834, 0.052820, 0.052805, 0.052790, 0.052776, 0.052761, 0.052746, 0.052731, 0.052716, 0.052701, 0.052686, 0.052671, 0.052656, 0.052640, 0.052625, 0.052610, 0.052594, 0.052579, 0.052563, 0.052548, 0.052532, 0.052516, 0.052500, 0.052484, 0.052469, 0.052453, 0.052437, 0.052421, 0.052405, 0.052389, 0.052373, 0.052357, 0.052341, 0.052325, 0.052309, 0.052292, 0.052276, 0.052260, 0.052244, 0.052227, 0.052211, 0.052195, 0.052178, 0.052162, 0.052146, 0.052129, 0.052113, 0.052097, 0.052080, 0.052064, 0.052048, 0.052031, 0.052015, 0.051999, 0.051983, 0.051966, 0.051950, 0.051934, 0.051917, 0.051901, 0.051885, 0.051869, 0.051853, 0.051836, 0.051820, 0.051804, 0.051788, 0.051772, 0.051756, 0.051740, 0.051724, 0.051708, 0.051692, 0.051676, 0.051660, 0.051645, 0.051629, 0.051613, 0.051598, 0.051582, 0.051567, 0.051551, 0.051536, 0.051521, 0.051506, 0.051490, 0.051475, 0.051460, 0.051446, 0.051431, 0.051416, 0.051401, 0.051387, 0.051372, 0.051358, 0.051343, 0.051329, 0.051315, 0.051301, 0.051287, 0.051273, 0.051259, 0.051246, 0.051232, 0.051219, 0.051205, 0.051192, 0.051179, 0.051166, 0.051153, 0.051140, 0.051127, 0.051115, 0.051102, 0.051090, 0.051078, 0.051066, 0.051054, 0.051042, 0.051030, 0.051019, 0.051007, 0.050996, 0.050985, 0.050974, 0.050963, 0.050952, 0.050942, 0.050931, 0.050921, 0.050910, 0.050900, 0.050890, 0.050880, 0.050871, 0.050861, 0.050851, 0.050842, 0.050833, 0.050824, 0.050815, 0.050806, 0.050798, 0.050789, 0.050781, 0.050773, 0.050765, 0.050757, 0.050749, 0.050741, 0.050734, 0.050726, 0.050719, 0.050712, 0.050705, 0.050699, 0.050692, 0.050685, 0.050679, 0.050673, 0.050667, 0.050661, 0.050655, 0.050649, 0.050644, 0.050638, 0.050633, 0.050628, 0.050623, 0.050618, 0.050614, 0.050609, 0.050605, 0.050600, 0.050596, 0.050592, 0.050589, 0.050585, 0.050581, 0.050578, 0.050575, 0.050572, 0.050568, 0.050566, 0.050563, 0.050560, 0.050558, 0.050555, 0.050553, 0.050551, 0.050549, 0.050547, 0.050545, 0.050544, 0.050542, 0.050541, 0.050540, 0.050538, 0.050537, 0.050537, 0.050536, 0.050535, 0.050535, 0.050534, 0.050534, 0.050534, 0.050534, 0.050534, 0.050534, 0.050534, 0.050534, 0.050535, 0.050536, 0.050536, 0.050537, 0.050538, 0.050539, 0.050541, 0.050542, 0.050544, 0.050545, 0.050547, 0.050549, 0.050551, 0.050553, 0.050555, 0.050557, 0.050559, 0.050562, 0.050564, 0.050567, 0.050570, 0.050573, 0.050576, 0.050579, 0.050582, 0.050586, 0.050589, 0.050593, 0.050597, 0.050600, 0.050604, 0.050608, 0.050612, 0.050617, 0.050621, 0.050625, 0.050630, 0.050634, 0.050639, 0.050643, 0.050648, 0.050653, 0.050658, 0.050663, 0.050669, 0.050674, 0.050679, 0.050685, 0.050690, 0.050696, 0.050702, 0.050708, 0.050714, 0.050720, 0.050726, 0.050732, 0.050738, 0.050744, 0.050751, 0.050757, 0.050764, 0.050770, 0.050777, 0.050783, 0.050790, 0.050797, 0.050804, 0.050810, 0.050817, 0.050824, 0.050831, 0.050838, 0.050845, 0.050852, 0.050859, 0.050867, 0.050874, 0.050881, 0.050888, 0.050896, 0.050903, 0.050910, 0.050917, 0.050925, 0.050932, 0.050940, 0.050947, 0.050954, 0.050962, 0.050969, 0.050976, 0.050984, 0.050991, 0.050999, 0.051006, 0.051013, 0.051020, 0.051027, 0.051034, 0.051042, 0.051049, 0.051056, 0.051063, 0.051070, 0.051076, 0.051083, 0.051090, 0.051097, 0.051103, 0.051110, 0.051116, 0.051123, 0.051129, 0.051136, 0.051142, 0.051148, 0.051154, 0.051160, 0.051166, 0.051171, 0.051177, 0.051183, 0.051188, 0.051194, 0.051199, 0.051204, 0.051209, 0.051214, 0.051219, 0.051224, 0.051229, 0.051233, 0.051238, 0.051242, 0.051246, 0.051250, 0.051254, 0.051257, 0.051261, 0.051264, 0.051268, 0.051271, 0.051274, 0.051277, 0.051279, 0.051282, 0.051284, 0.051286, 0.051288, 0.051290, 0.051292, 0.051294, 0.051295, 0.051296, 0.051298, 0.051299, 0.051300, 0.051300, 0.051301, 0.051301, 0.051301, 0.051301, 0.051301, 0.051301, 0.051300, 0.051299, 0.051299, 0.051298, 0.051296, 0.051295, 0.051294, 0.051292, 0.051290, 0.051288, 0.051286, 0.051284, 0.051282, 0.051279, 0.051277, 0.051274, 0.051271, 0.051268, 0.051265, 0.051261, 0.051258, 0.051254, 0.051250, 0.051246, 0.051242, 0.051237, 0.051233, 0.051229, 0.051224, 0.051219, 0.051214, 0.051209, 0.051204, 0.051199, 0.051193, 0.051188, 0.051182, 0.051176, 0.051170, 0.051164, 0.051158, 0.051152, 0.051146, 0.051139, 0.051133, 0.051126, 0.051120, 0.051113, 0.051106, 0.051099, 0.051092, 0.051085, 0.051078, 0.051071, 0.051064, 0.051057, 0.051049, 0.051042, 0.051035, 0.051027, 0.051020, 0.051012, 0.051005, 0.050997, 0.050989, 0.050982, 0.050974, 0.050966, 0.050958, 0.050950, 0.050943, 0.050935, 0.050927, 0.050919, 0.050912, 0.050904, 0.050896, 0.050888, 0.050881, 0.050873, 0.050865, 0.050857, 0.050850, 0.050842, 0.050834, 0.050827, 0.050819, 0.050811, 0.050804, 0.050796, 0.050789, 0.050782, 0.050774, 0.050767, 0.050760, 0.050753, 0.050746, 0.050739, 0.050732, 0.050725, 0.050718, 0.050712, 0.050705, 0.050698, 0.050692, 0.050685, 0.050678, 0.050672, 0.050666, 0.050660, 0.050653, 0.050647, 0.050641, 0.050635, 0.050630, 0.050624, 0.050618, 0.050613, 0.050607, 0.050602, 0.050597, 0.050592, 0.050587, 0.050582, 0.050577, 0.050572, 0.050567, 0.050562, 0.050558, 0.050553, 0.050549, 0.050544, 0.050540, 0.050536, 0.050531, 0.050527, 0.050523, 0.050519, 0.050516, 0.050512, 0.050508, 0.050504, 0.050501, 0.050498, 0.050494, 0.050491, 0.050488, 0.050484, 0.050481, 0.050478, 0.050475, 0.050472, 0.050469, 0.050467, 0.050464, 0.050461, 0.050459, 0.050456, 0.050453, 0.050451, 0.050449, 0.050446, 0.050444, 0.050442, 0.050439, 0.050437, 0.050435, 0.050433, 0.050430, 0.050428, 0.050426, 0.050424, 0.050422, 0.050420, 0.050418, 0.050416, 0.050415, 0.050413, 0.050411, 0.050409, 0.050407, 0.050405, 0.050404, 0.050402, 0.050400, 0.050398, 0.050397, 0.050395, 0.050393, 0.050391, 0.050389, 0.050387, 0.050385, 0.050384, 0.050382, 0.050380, 0.050378, 0.050376, 0.050374, 0.050372, 0.050370, 0.050368, 0.050366, 0.050364, 0.050362, 0.050360, 0.050358, 0.050356, 0.050354, 0.050351, 0.050349, 0.050347, 0.050345, 0.050343, 0.050340, 0.050338, 0.050336, 0.050333, 0.050331, 0.050328, 0.050326, 0.050323, 0.050321, 0.050318, 0.050316, 0.050313, 0.050310, 0.050308, 0.050305, 0.050302, 0.050299, 0.050296, 0.050294, 0.050291, 0.050288, 0.050285, 0.050282, 0.050279, 0.050276, 0.050273, 0.050270, 0.050267, 0.050264, 0.050261, 0.050257, 0.050254, 0.050251, 0.050248, 0.050244, 0.050241, 0.050238, 0.050234, 0.050231, 0.050228, 0.050224, 0.050221, 0.050218, 0.050214, 0.050211, 0.050207, 0.050204, 0.050201, 0.050197, 0.050194, 0.050191, 0.050187, 0.050184, 0.050180, 0.050177, 0.050173, 0.050170, 0.050166, 0.050163, 0.050160, 0.050156, 0.050153, 0.050150, 0.050146, 0.050143, 0.050140, 0.050136, 0.050133, 0.050130, 0.050126, 0.050123, 0.050120, 0.050116, 0.050113, 0.050110, 0.050107, 0.050104, 0.050101, 0.050098, 0.050094, 0.050091, 0.050088, 0.050085, 0.050082, 0.050080, 0.050076, 0.050074, 0.050071, 0.050068, 0.050065, 0.050062, 0.050059, 0.050056, 0.050054, 0.050051, 0.050048, 0.050046, 0.050043, 0.050040, 0.050038, 0.050035, 0.050033, 0.050030, 0.050028, 0.050026, 0.050023, 0.050021, 0.050019, 0.050017, 0.050014, 0.050012, 0.050010, 0.050008, 0.050006, 0.050003, 0.050001, 0.049999, 0.049997, 0.049995, 0.049992, 0.049990, 0.049988, 0.049986, 0.049984, 0.049982, 0.049980, 0.049978, 0.049977, 0.049975, 0.049973, 0.049971, 0.049969, 0.049967, 0.049966, 0.049964, 0.049962, 0.049960, 0.049958, 0.049956, 0.049954, 0.049953, 0.049951, 0.049949, 0.049947, 0.049945, 0.049943, 0.049942, 0.049940, 0.049938, 0.049936, 0.049934, 0.049932, 0.049930, 0.049928, 0.049926, 0.049924, 0.049922, 0.049920, 0.049917, 0.049915, 0.049913, 0.049911, 0.049909, 0.049907, 0.049905, 0.049902, 0.049900, 0.049897, 0.049895, 0.049893, 0.049890, 0.049888, 0.049885, 0.049883, 0.049880, 0.049878, 0.049875, 0.049872, 0.049869, 0.049867, 0.049864, 0.049861, 0.049858, 0.049855, 0.049853, 0.049850, 0.049847, 0.049844, 0.049841, 0.049838, 0.049834, 0.049831, 0.049828, 0.049825, 0.049821, 0.049818, 0.049815, 0.049811, 0.049808, 0.049804, 0.049800, 0.049797, 0.049793, 0.049789, 0.049786, 0.049782, 0.049778, 0.049774, 0.049770, 0.049766, 0.049762, 0.049758, 0.049754, 0.049750, 0.049746, 0.049742, 0.049738, 0.049734, 0.049729, 0.049725, 0.049721, 0.049717, 0.049712, 0.049708, 0.049704, 0.049699, 0.049695, 0.049691, 0.049686, 0.049682, 0.049677, 0.049673, 0.049668, 0.049664, 0.049659, 0.049655, 0.049650, 0.049646, 0.049641, 0.049637, 0.049632, 0.049628, 0.049623, 0.049619, 0.049614, 0.049610, 0.049605, 0.049601, 0.049597, 0.049592, 0.049588, 0.049584, 0.049580, 0.049575, 0.049571, 0.049567, 0.049563, 0.049559, 0.049555, 0.049551, 0.049547, 0.049543, 0.049539, 0.049536, 0.049532, 0.049528, 0.049524, 0.049521, 0.049517, 0.049514, 0.049510, 0.049507, 0.049504, 0.049500, 0.049497, 0.049494, 0.049491, 0.049488, 0.049485, 0.049483, 0.049480, 0.049477, 0.049475, 0.049472, 0.049470, 0.049468, 0.049466, 0.049464, 0.049462, 0.049460, 0.049458, 0.049457, 0.049455, 0.049454, 0.049452, 0.049451, 0.049450, 0.049449, 0.049448, 0.049448, 0.049447, 0.049447, 0.049446, 0.049446, 0.049446, 0.049446, 0.049446, 0.049446, 0.049447, 0.049447, 0.049448, 0.049449, 0.049450, 0.049450, 0.049451, 0.049453, 0.049454, 0.049456, 0.049457, 0.049459, 0.049461, 0.049463, 0.049465, 0.049467, 0.049470, 0.049472, 0.049475, 0.049477, 0.049480, 0.049483, 0.049486, 0.049489, 0.049493, 0.049496, 0.049500, 0.049503
