# Supplementary material for: Non-classical microwave–optical photon pair generation with a chip-scale transducer
Source: Springer Nature journal article supplement (doi:10.1038/s41567-024-02409-z), 2024-02-23
Supplement: MOESM4 [file 41567_2024_2409_MOESM4_ESM.zip › Fig3/fig3c_fit.txt]

0.770000, 1.540000, 3.080000, 6.160000, 12.320000, 24.640000
0.154298, 0.229978, 0.342778, 0.510904, 0.761494, 1.134994
