# Supplementary material for: Non-classical microwave–optical photon pair generation with a chip-scale transducer
Source: Springer Nature journal article supplement (doi:10.1038/s41567-024-02409-z), 2024-02-23
Supplement: MOESM4 [file 41567_2024_2409_MOESM4_ESM.zip › Fig3/fig3d_data.txt]

20.000000	40.000000	80.000000	200.000000
0.036082	0.020215	0.006035	-0.003584
0.009995	0.008552	0.008839	0.008909
