# Supplementary material for: Non-classical microwave–optical photon pair generation with a chip-scale transducer
Source: Springer Nature journal article supplement (doi:10.1038/s41567-024-02409-z), 2024-02-23
Supplement: MOESM4 [file 41567_2024_2409_MOESM4_ESM.zip › Fig3/fig3d_fit.txt]

20.000000, 21.818182, 23.636364, 25.454545, 27.272727, 29.090909, 30.909091, 32.727273, 34.545455, 36.363636, 38.181818, 40.000000, 41.818182, 43.636364, 45.454545, 47.272727, 49.090909, 50.909091, 52.727273, 54.545455, 56.363636, 58.181818, 60.000000, 61.818182, 63.636364, 65.454545, 67.272727, 69.090909, 70.909091, 72.727273, 74.545455, 76.363636, 78.181818, 80.000000, 81.818182, 83.636364, 85.454545, 87.272727, 89.090909, 90.909091, 92.727273, 94.545455, 96.363636, 98.181818, 100.000000, 101.818182, 103.636364, 105.454545, 107.272727, 109.090909, 110.909091, 112.727273, 114.545455, 116.363636, 118.181818, 120.000000, 121.818182, 123.636364, 125.454545, 127.272727, 129.090909, 130.909091, 132.727273, 134.545455, 136.363636, 138.181818, 140.000000, 141.818182, 143.636364, 145.454545, 147.272727, 149.090909, 150.909091, 152.727273, 154.545455, 156.363636, 158.181818, 160.000000, 161.818182, 163.636364, 165.454545, 167.272727, 169.090909, 170.909091, 172.727273, 174.545455, 176.363636, 178.181818, 180.000000, 181.818182, 183.636364, 185.454545, 187.272727, 189.090909, 190.909091, 192.727273, 194.545455, 196.363636, 198.181818, 200.000000
0.036220, 0.034306, 0.032493, 0.030775, 0.029149, 0.027608, 0.026149, 0.024767, 0.023458, 0.022218, 0.021043, 0.019931, 0.018878, 0.017880, 0.016935, 0.016040, 0.015192, 0.014389, 0.013628, 0.012908, 0.012226, 0.011580, 0.010967, 0.010388, 0.009839, 0.009319, 0.008826, 0.008360, 0.007918, 0.007499, 0.007103, 0.006727, 0.006372, 0.006035, 0.005716, 0.005414, 0.005128, 0.004857, 0.004600, 0.004357, 0.004127, 0.003909, 0.003702, 0.003506, 0.003321, 0.003145, 0.002979, 0.002822, 0.002673, 0.002531, 0.002397, 0.002271, 0.002151, 0.002037, 0.001929, 0.001827, 0.001731, 0.001639, 0.001553, 0.001471, 0.001393, 0.001319, 0.001250, 0.001183, 0.001121, 0.001062, 0.001006, 0.000952, 0.000902, 0.000854, 0.000809, 0.000766, 0.000726, 0.000688, 0.000651, 0.000617, 0.000584, 0.000553, 0.000524, 0.000496, 0.000470, 0.000445, 0.000422, 0.000399, 0.000378, 0.000358, 0.000339, 0.000321, 0.000304, 0.000288, 0.000273, 0.000259, 0.000245, 0.000232, 0.000220, 0.000208, 0.000197, 0.000187, 0.000177, 0.000168
