# Supplementary material for: Non-classical microwave–optical photon pair generation with a chip-scale transducer
Source: Springer Nature journal article supplement (doi:10.1038/s41567-024-02409-z), 2024-02-23
Supplement: MOESM5 [file 41567_2024_2409_MOESM5_ESM.zip]

Archive with 7 entries (7 files):
- Fig4/data_key_for_4a_and_4b.txt
- Fig4/fig4a_data.txt
- Fig4/fig4a_gating_window.txt
- Fig4/fig4b_data.txt
- Fig4/fig4b_delays.txt
- Fig4/fig4c.txt
- Fig4/fig4d.txt
