# Supplementary material for: Non-classical microwave–optical photon pair generation with a chip-scale transducer
Source: Springer Nature journal article supplement (doi:10.1038/s41567-024-02409-z), 2024-02-23
Supplement: MOESM5 [file 41567_2024_2409_MOESM5_ESM.zip › Fig4/data_key_for_4a_and_4b.txt]

file: fig4a_data
first row: t (us)
second row: Optical CR (Hz)

----

file: fig4b_data
first row: tau (us)
second row: C_{11}
third row: mean of C_{11, click}
fourth row: mean-SD of C_{11, click}
fifth row: mean+SD of C_{11, click}
