# Supplementary material for: Non-classical microwave–optical photon pair generation with a chip-scale transducer
Source: Springer Nature journal article supplement (doi:10.1038/s41567-024-02409-z), 2024-02-23
Supplement: MOESM5 [file 41567_2024_2409_MOESM5_ESM.zip › Fig4/fig4a_data.txt]

-0.824983, -0.814950, -0.804916, -0.794883, -0.784849, -0.774816, -0.764783, -0.754749, -0.744716, -0.734682, -0.724649, -0.714615, -0.704582, -0.694548, -0.684515, -0.674482, -0.664448, -0.654415, -0.644381, -0.634348, -0.624314, -0.614281, -0.604247, -0.594214, -0.584181, -0.574147, -0.564114, -0.554080, -0.544047, -0.534013, -0.523980, -0.513946, -0.503913, -0.493880, -0.483846, -0.473813, -0.463779, -0.453746, -0.443712, -0.433679, -0.423645, -0.413612, -0.403579, -0.393545, -0.383512, -0.373478, -0.363445, -0.353411, -0.343378, -0.333344, -0.323311, -0.313278, -0.303244, -0.293211, -0.283177, -0.273144, -0.263110, -0.253077, -0.243043, -0.233010, -0.222977, -0.212943, -0.202910, -0.192876, -0.182843, -0.172809, -0.162776, -0.152742, -0.142709, -0.132676, -0.122642, -0.112609, -0.102575, -0.092542, -0.082508, -0.072475, -0.062441, -0.052408, -0.042375, -0.032341, -0.022308, -0.012274, -0.002241, 0.007793, 0.017826, 0.027860, 0.037893, 0.047926, 0.057960, 0.067993, 0.078027, 0.088060, 0.098094, 0.108127, 0.118161, 0.128194, 0.138227, 0.148261, 0.158294, 0.168328, 0.178361, 0.188395, 0.198428, 0.208462, 0.218495, 0.228528, 0.238562, 0.248595, 0.258629, 0.268662, 0.278696, 0.288729, 0.298763, 0.308796, 0.318829, 0.328863, 0.338896, 0.348930, 0.358963, 0.368997, 0.379030, 0.389064, 0.399097, 0.409130, 0.419164, 0.429197, 0.439231, 0.449264, 0.459298, 0.469331, 0.479365, 0.489398, 0.499431, 0.509465, 0.519498, 0.529532, 0.539565, 0.549599, 0.559632, 0.569666, 0.579699, 0.589732, 0.599766, 0.609799, 0.619833, 0.629866, 0.639900, 0.649933, 0.659967, 0.670000, 0.680033, 0.690067, 0.700100, 0.710134, 0.720167, 0.730201, 0.740234, 0.750268, 0.760301, 0.770334, 0.780368, 0.790401, 0.800435, 0.810468, 0.820502, 0.830535, 0.840569, 0.850602, 0.860635, 0.870669, 0.880702, 0.890736, 0.900769, 0.910803, 0.920836, 0.930870, 0.940903, 0.950936, 0.960970, 0.971003, 0.981037, 0.991070, 1.001104, 1.011137, 1.021171, 1.031204, 1.041237, 1.051271, 1.061304, 1.071338, 1.081371, 1.091405, 1.101438, 1.111472, 1.121505, 1.131538, 1.141572, 1.151605, 1.161639, 1.171672, 1.181706, 1.191739, 1.201773, 1.211806, 1.221839, 1.231873, 1.241906, 1.251940, 1.261973, 1.272007, 1.282040, 1.292074, 1.302107, 1.312140, 1.322174, 1.332207, 1.342241, 1.352274, 1.362308, 1.372341, 1.382375, 1.392408, 1.402441, 1.412475, 1.422508, 1.432542, 1.442575, 1.452609, 1.462642, 1.472676, 1.482709, 1.492742, 1.502776, 1.512809, 1.522843, 1.532876, 1.542910, 1.552943, 1.562977, 1.573010, 1.583043, 1.593077, 1.603110, 1.613144, 1.623177, 1.633211, 1.643244, 1.653278, 1.663311, 1.673344, 1.683378, 1.693411, 1.703445, 1.713478, 1.723512, 1.733545, 1.743579, 1.753612, 1.763645, 1.773679, 1.783712, 1.793746, 1.803779, 1.813813, 1.823846, 1.833880, 1.843913, 1.853946, 1.863980, 1.874013, 1.884047, 1.894080, 1.904114, 1.914147, 1.924181, 1.934214, 1.944247, 1.954281, 1.964314, 1.974348, 1.984381, 1.994415, 2.004448, 2.014482, 2.024515, 2.034548, 2.044582, 2.054615, 2.064649, 2.074682, 2.084716, 2.094749, 2.104783, 2.114816, 2.124849, 2.134883, 2.144916, 2.154950, 2.164983
1.399910, 1.493817, 1.443386, 1.532076, 1.391215, 1.483383, 1.563378, 1.412084, 1.488600, 1.441647, 1.446864, 1.459037, 1.497296, 1.504252, 1.464254, 1.474688, 1.497296, 1.512947, 1.493817, 1.460776, 1.445125, 1.486861, 1.405127, 1.380781, 1.441647, 1.485122, 1.558161, 1.441647, 1.342523, 1.438169, 1.450342, 1.459037, 1.452081, 1.568595, 1.483383, 1.431213, 1.387737, 1.488600, 1.460776, 1.472949, 1.452081, 1.439908, 1.422518, 1.575551, 1.419040, 1.391215, 1.419040, 1.452081, 1.472949, 1.389476, 1.457298, 1.462515, 1.346001, 1.554683, 1.413823, 1.495556, 1.429474, 1.471210, 1.450342, 1.443386, 1.547727, 1.533815, 1.551205, 1.700761, 1.669458, 1.718151, 1.747714, 1.744236, 1.752931, 1.919877, 1.911182, 1.912921, 1.979004, 1.916399, 2.166818, 2.076389, 2.072911, 2.126820, 2.232901, 2.250291, 2.231162, 2.521578, 2.681568, 2.766779, 3.371958, 3.728457, 4.481452, 5.093587, 5.803107, 6.644792, 7.561255, 8.349031, 9.587213, 10.274125, 10.837567, 12.042708, 12.234000, 12.828744, 12.651364, 13.086119, 12.707013, 12.566153, 11.882718, 11.336666, 10.731487, 10.121092, 9.675903, 9.063768, 8.319468, 7.597775, 7.157803, 6.589144, 5.804846, 5.528342, 5.004897, 4.643181, 4.312768, 4.032785, 3.679765, 3.309353, 3.187622, 2.940681, 2.695480, 2.570270, 2.399846, 2.286810, 2.036391, 2.125081, 1.935528, 1.975526, 1.824231, 1.789451, 1.695544, 1.653807, 1.718151, 1.639895, 1.632939, 1.603376, 1.591203, 1.612071, 1.478166, 1.660763, 1.580768, 1.592942, 1.499035, 1.540771, 1.502513, 1.526859, 1.493817, 1.507730, 1.552944, 1.382520, 1.558161, 1.474688, 1.490339, 1.448603, 1.465993, 1.427735, 1.511208, 1.394693, 1.439908, 1.483383, 1.507730, 1.519903, 1.500774, 1.505991, 1.392954, 1.467732, 1.429474, 1.455559, 1.467732, 1.486861, 1.483383, 1.492078, 1.368608, 1.514686, 1.502513, 1.476427, 1.424257, 1.519903, 1.455559, 1.425996, 1.382520, 1.493817, 1.459037, 1.427735, 1.462515, 1.483383, 1.575551, 1.547727, 1.486861, 1.532076, 1.438169, 1.455559, 1.575551, 1.446864, 1.446864, 1.450342, 1.521642, 1.459037, 1.535554, 1.465993, 1.413823, 1.453820, 1.365130, 1.502513, 1.509469, 1.514686, 1.476427, 1.613810, 1.467732, 1.403388, 1.439908, 1.481644, 1.441647, 1.441647, 1.530337, 1.485122, 1.542510, 1.521642, 1.488600, 1.436430, 1.542510, 1.420779, 1.401649, 1.410345, 1.479905, 1.511208, 1.518164, 1.479905, 1.439908, 1.436430, 1.419040, 1.523381, 1.387737, 1.603376, 1.544249, 1.417301, 1.526859, 1.502513, 1.373825, 1.472949, 1.535554, 1.432952, 1.495556, 1.525120, 1.507730, 1.542510, 1.425996, 1.525120, 1.408606, 1.443386, 1.533815, 1.398171, 1.441647, 1.425996, 1.552944, 1.427735, 1.479905, 1.417301, 1.379042, 1.469471, 1.481644, 1.445125, 1.399910, 1.452081, 1.445125, 1.512947, 1.464254, 1.488600, 1.452081, 1.420779, 1.504252, 1.405127, 1.434691, 1.535554, 1.459037, 1.464254, 1.441647, 1.453820, 1.424257, 1.443386, 1.547727, 1.483383, 1.497296, 1.453820, 1.533815, 1.474688, 1.514686, 1.464254, 1.601637, 1.537293, 1.518164, 1.443386, 1.410345, 1.500774, 1.459037, 1.481644, 1.408606
