# Supplementary material for: Non-classical microwave–optical photon pair generation with a chip-scale transducer
Source: Springer Nature journal article supplement (doi:10.1038/s41567-024-02409-z), 2024-02-23
Supplement: MOESM5 [file 41567_2024_2409_MOESM5_ESM.zip › Fig4/fig4a_gating_window.txt]

gate_start = 0
gate_stop = 0.32
