# Supplementary material for: Non-classical microwave–optical photon pair generation with a chip-scale transducer
Source: Springer Nature journal article supplement (doi:10.1038/s41567-024-02409-z), 2024-02-23
Supplement: MOESM5 [file 41567_2024_2409_MOESM5_ESM.zip › Fig4/fig4b_data.txt]

-0.985000	-0.984000	-0.983000	-0.982000	-0.981000	-0.980000	-0.979000	-0.978000	-0.977000	-0.976000	-0.975000	-0.974000	-0.973000	-0.972000	-0.971000	-0.970000	-0.969000	-0.968000	-0.967000	-0.966000	-0.965000	-0.964000	-0.963000	-0.962000	-0.961000	-0.960000	-0.959000	-0.958000	-0.957000	-0.956000	-0.955000	-0.954000	-0.953000	-0.952000	-0.951000	-0.950000	-0.949000	-0.948000	-0.947000	-0.946000	-0.945000	-0.944000	-0.943000	-0.942000	-0.941000	-0.940000	-0.939000	-0.938000	-0.937000	-0.936000
0.031024	0.031027	0.031031	0.031034	0.031038	0.031042	0.031046	0.031050	0.031054	0.031058	0.031063	0.031067	0.031071	0.031076	0.031081	0.031085	0.031090	0.031095	0.031100	0.031105	0.031110	0.031116	0.031121	0.031126	0.031132	0.031137	0.031142	0.031148	0.031153	0.031159	0.031164	0.031170	0.031175	0.031181	0.031187	0.031193	0.031198	0.031204	0.031210	0.031216	0.031222	0.031228	0.031234	0.031240	0.031246	0.031252	0.031258	0.031264	0.031270	0.031277
0.031720	0.031686	0.031654	0.031622	0.031592	0.031562	0.031533	0.031505	0.031479	0.031454	0.031429	0.031405	0.031383	0.031361	0.031341	0.031321	0.031303	0.031286	0.031270	0.031254	0.031240	0.031227	0.031213	0.031202	0.031191	0.031182	0.031173	0.031165	0.031158	0.031151	0.031145	0.031141	0.031138	0.031134	0.031131	0.031129	0.031127	0.031126	0.031126	0.031126	0.031127	0.031129	0.031131	0.031134	0.031137	0.031141	0.031145	0.031150	0.031156	0.031162
0.023247	0.023213	0.023181	0.023150	0.023119	0.023090	0.023061	0.023034	0.023007	0.022982	0.022958	0.022935	0.022913	0.022892	0.022872	0.022853	0.022836	0.022819	0.022804	0.022789	0.022776	0.022763	0.022751	0.022740	0.022731	0.022723	0.022715	0.022708	0.022702	0.022697	0.022693	0.022691	0.022689	0.022688	0.022687	0.022687	0.022688	0.022689	0.022692	0.022695	0.022698	0.022704	0.022709	0.022716	0.022723	0.022729	0.022737	0.022747	0.022757	0.022768
0.040193	0.040159	0.040127	0.040095	0.040064	0.040035	0.040006	0.039977	0.039950	0.039925	0.039900	0.039876	0.039853	0.039831	0.039810	0.039790	0.039770	0.039752	0.039736	0.039720	0.039705	0.039690	0.039676	0.039663	0.039652	0.039641	0.039630	0.039621	0.039613	0.039604	0.039597	0.039591	0.039586	0.039580	0.039575	0.039570	0.039566	0.039562	0.039560	0.039557	0.039555	0.039553	0.039553	0.039552	0.039552	0.039552	0.039552	0.039553	0.039555	0.039556
[truncated: 2,940 more columns]
