# Supplementary material for: Non-classical microwave–optical photon pair generation with a chip-scale transducer
Source: Springer Nature journal article supplement (doi:10.1038/s41567-024-02409-z), 2024-02-23
Supplement: MOESM5 [file 41567_2024_2409_MOESM5_ESM.zip › Fig4/fig4c.txt]

g2_ac_bef	g2_ac	g2_ac_aft
0.9355	3.8995	1.0024
g2_ac_bef_err_lower	g2_ac_err_lower	g2_ac_aft_err_lower
0.2684	0.0929	0.0838
g2_ac_bef_err_upper	g2_ac_err_upper	g2_ac_aft_err_upper
0.2684	0.0929	0.0838
