# Supplementary material for: Non-classical microwave–optical photon pair generation with a chip-scale transducer
Source: Springer Nature journal article supplement (doi:10.1038/s41567-024-02409-z), 2024-02-23
Supplement: MOESM5 [file 41567_2024_2409_MOESM5_ESM.zip › Fig4/fig4d.txt]

direct_g_2_mb,correlated_g_2_mb
1.9054,0.4202

direct_g_2_mb_err_lower,correlated_g_2_mb_err_lower
0.1433,0.2787

direct_g_2_mb_err_upper,correlated_g_2_mb_err_upper
0.1401,0.2729
